# Supplementary material for: Measuring and Validating the Factors Influenced the SME Business Growth in Germany—Descriptive Analysis and Construct Validation
Source: MDPI journal article supplement (doi:10.3390/data7110158), 2022-11-10
Supplement: s1 [file s1]

**Coefficients<sup>a</sup>**

| Model        | Unstandardized Coefficients |            | Standardized Coefficients | t      | Sig. |
|--------------|-----------------------------|------------|---------------------------|--------|------|
|              | B                           | Std. Error | Beta                      |        |      |
| 1 (Constant) | .038                        | .104       |                           | .369   | .713 |
| MDRM         | .995                        | .041       | .921                      | 24.052 | .000 |

**Coefficients<sup>a</sup>**

| Model        | Collinearity Statistics |       |
|--------------|-------------------------|-------|
|              | Tolerance               | VIF   |
| 1 (Constant) |                         |       |
| MDRM         | 1.000                   | 1.000 |

a. Dependent Variable: SMPM

**Coefficients<sup>a</sup>**

| Model            | Collinearity Statistics |       |
|------------------|-------------------------|-------|
|                  | Tolerance               | VIF   |
| 1 implementation | .950                    | 1.052 |
| transperancy     | .950                    | 1.052 |

a. Dependent Variable: innovation

**Collinearity Diagnostics<sup>a</sup>**

| Model | Dimension | Eigenvalue | Condition Index | Variance Proportions |                |              |
|-------|-----------|------------|-----------------|----------------------|----------------|--------------|
|       |           |            |                 | (Constant)           | implementation | transperancy |
| 1     | 1         | 2.906      | 1.000           | .00                  | .00            | .01          |
|       | 2         | .072       | 6.342           | .07                  | .11            | .98          |
|       | 3         | .022       | 11.575          | .93                  | .88            | .01          |

a. Dependent Variable: innovation
