# Supplementary material for: Measuring and Validating the Factors Influenced the SME Business Growth in Germany—Descriptive Analysis and Construct Validation
Source: MDPI journal article supplement (doi:10.3390/data7110158), 2022-11-10
Supplement: s1 [file s1]

```

> setwd("C:/DBA/Dr,Hosam/Statistics N1")#setting our working directory
> datast<-read.csv("m105r.csv", header=TRUE)# importing data
> dataFin<-datast[,1:26]
> library(polycor)#performing ploychoric correlation
> datacor<-hetcor(dataFin, use="complete.obs")
> datacor2<-datacor$correlations#extract the correlation matrix from list named datacor
> #standardizing the data
> datastand<-data.frame(scale(datacor2, center=TRUE, scale=TRUE))
> #evaluating the sampling adequacy
> library(psych)
> adequacy<-KMO(dataFin)
> adequacy

```

Kaiser-Meyer-Olkin factor adequacy

Call: KMO(r = dataFin)

Overall MSA = 0.86

MSA for each item =

| MDR1 | MDR2 | MDR3 | MDR4 | MDR5 | MDR6 | MDR7 | MDR8 | MDR9 |
|------|------|------|------|------|------|------|------|------|
| 0.88 | 0.82 | 0.83 | 0.88 | 0.80 | 0.89 | 0.91 | 0.91 | 0.76 |

  

| MDR10 | MDR11 | SMEF1 | SMEP1 | SMEP2 | SMEP3 | SMEP4 | SMEF2 | MDR12 |
|-------|-------|-------|-------|-------|-------|-------|-------|-------|
| 0.41  | 0.73  | 0.82  | 0.91  | 0.88  | 0.80  | 0.36  | 0.90  | 0.53  |

  

| SMEP5 | SMEF3 | SMEP6 | SMEF4 | SMEP7 | SMEF5 | SMEP8 | SMEF6 |
|-------|-------|-------|-------|-------|-------|-------|-------|
| 0.93  | 0.74  | 0.71  | 0.91  | 0.92  | 0.91  | 0.67  | 0.77  |

```

> library(REdaS)
> #Bartlett's Test of Sphericity
> bart_spher(dataFin,use="complete.obs")

```

Bartlett's Test of Sphericity

Call: bart\_spher(x = dataFin, use = "complete.obs")

X2 = 1122.365

df = 325

p-value < 2.22e-16

> #visualizing correlation matrix

> library(corrplot)

> par(oma=c(0.5,0.5,1.5,0.5), xpd=TRUE)#for outermargin:oma

> corrplot(cor(datastand,use="complete.obs" ), order="hclust",tl.col='black',tl.cex=0.85)

> save.image("C:/DBA/research paper,/German med paper/Data/data set/R software 4.1.1  
(21) results.RData")

> save.image("C:/DBA/research paper,/German med paper/Data/workspace.RData")
