# Supplementary material for: Measuring and Validating the Factors Influenced the SME Business Growth in Germany—Descriptive Analysis and Construct Validation
Source: MDPI journal article supplement (doi:10.3390/data7110158), 2022-11-10
Supplement: s1 [file s1]

**Table S1: The Factor Loading Rotated Component Matrix**

| Variable |                   |                        |
|----------|-------------------|------------------------|
|          | Components        |                        |
|          | Financial Burdens | Commercial performance |
| SMEF4    | .890              | -.109                  |
| SMEF2    | .843              | -.169                  |
| SMEF1    | .619              |                        |
| SMEF5    | .612              |                        |
| SMEF3    | .417              |                        |
| SMEF6    | -.112             | .993                   |

**Table S2: Variance and Rotation Sums of Squared Loadings**

| Variables | Total | % of Variance | Cumulative % |
|-----------|-------|---------------|--------------|
| Raw 1     | 1.684 | 41.661        | 41.661       |
| Raw 2     | .914  | 22.625        | 64.285       |

| Variable |           |       |
|----------|-----------|-------|
|          | Component |       |
|          | 1         | 2     |
| SMEP2    | .763      | -.124 |
| SMEP1    | .717      | -.264 |
| SMEP5    | .698      |       |
| SMEP3    | .657      |       |
| SMEP7    | .649      | -.226 |
| SMEP6    | .461      | .135  |

| Variable   | Total | % Of Variance | Cumulative % |
|------------|-------|---------------|--------------|
| Raw 1      | 2.265 | 35.826        | 35.826       |
| Raw 2      | 1.529 | 24.183        | 60.009       |
| Rescaled 1 | 2.617 | 37.381        | 35.826       |
| Rescaled 2 | 1.172 | 16.742        | 60.009       |

| Variable | Raw       |       | Rescaled  |       |
|----------|-----------|-------|-----------|-------|
|          | Component |       | Component |       |
|          | 1         | 2     | 1         | 2     |
| MDR7     | .681      | -.315 | .804      | -.371 |
| MDR1     | -.600     | .300  | -.690     | .345  |
| MDR11    | .678      | .252  | .678      | .252  |
| MDR6     | .577      | -.227 | .666      | -.262 |
| MDR4     | .450      | -.111 | .655      | -.162 |
| MDR8     | .391      |       | .596      |       |
| MDR2     | .373      | -.221 | .524      | -.311 |
| MDR9     |           | 1.113 |           | .918  |
| MDR5     |           | .498  |           | .567  |
| MDR3     | -.182     | .335  | -.208     | .384  |

| Variable   | Total | % of Variance | Cumulative % |
|------------|-------|---------------|--------------|
| Raw 1      | 2.763 | 36.184        | 36.184       |
| Raw 2      | 1.359 | 17.791        | 53.975       |
| Rescaled 1 | 3.579 | 35.786        | 36.184       |
| Rescaled 2 | 1.383 | 13.834        | 53.975       |
