# Supplementary material for: Measuring and Validating the Factors Influenced the SME Business Growth in Germany—Descriptive Analysis and Construct Validation
Source: MDPI journal article supplement (doi:10.3390/data7110158), 2022-11-10
Supplement: s1 [file s1]

```

GET
  FILE='C:\DBA\research paper,\German med paper\statistics\110 spss
data.sav'.
DATASET NAME DataSet1 WINDOW=FRONT.
DESCRIPTIVES VARIABLES=MDR1 MDR2 MDR3 MDR4 MDR5 MDR6 MDR7 MDR8 MDR9 MDR11
/SAVE
/STATISTICS=MEAN STDDEV MIN MAX.

```

## Descriptives

| Notes                         |                           |                                                                           |
|-------------------------------|---------------------------|---------------------------------------------------------------------------|
| Output Created                |                           | 15-SEP-2022 14:11:43                                                      |
| Comments                      |                           |                                                                           |
| Input                         | Data                      | C:\DBA\research paper,\German med paper\statistics\110 spss data.sav      |
|                               | Active Dataset            | DataSet1                                                                  |
|                               | Filter                    | <none>                                                                    |
|                               | Weight                    | <none>                                                                    |
|                               | Split File                | <none>                                                                    |
|                               | N of Rows in Working Data | 110                                                                       |
| Missing Value Handling        | File                      |                                                                           |
|                               | Definition of Missing     | User defined missing values are treated as missing.                       |
| Syntax                        | Cases Used                | All non-missing data are used.                                            |
|                               |                           | DESCRIPTIVES VARIABLES=MDR1 MDR2 MDR3 MDR4 MDR5 MDR6 MDR7 MDR8 MDR9 MDR11 |
|                               |                           | /SAVE                                                                     |
|                               |                           | /STATISTICS=MEAN STDDEV MIN MAX.                                          |
| Resources                     | Processor Time            | 00:00:00.02                                                               |
|                               | Elapsed Time              | 00:00:00.02                                                               |
| Variables Created or Modified | ZMDR1                     | Zscore(MDR1)                                                              |
|                               | ZMDR2                     | Zscore(MDR2)                                                              |
|                               | ZMDR3                     | Zscore(MDR3)                                                              |
|                               | ZMDR4                     | Zscore(MDR4)                                                              |
|                               | ZMDR5                     | Zscore(MDR5)                                                              |
|                               | ZMDR6                     | Zscore(MDR6)                                                              |
|                               | ZMDR7                     | Zscore(MDR7)                                                              |
|                               | ZMDR8                     | Zscore(MDR8)                                                              |

|        |               |
|--------|---------------|
| ZMDR9  | Zscore(MDR9)  |
| ZMDR11 | Zscore(MDR11) |

[DataSet1] C:\DBA\research paper,\German med paper\statistics\110 spss data.sav

#### Descriptive Statistics

|                    | N   | Minimum | Maximum | Mean  | Std. Deviation |
|--------------------|-----|---------|---------|-------|----------------|
| MDR1               | 110 | 1.0     | 5.0     | 4.067 | .8690          |
| MDR2               | 110 | 1.0     | 5.0     | 2.048 | .7123          |
| MDR3               | 110 | 1.0     | 5.0     | 2.400 | .8727          |
| MDR4               | 110 | 1.0     | 5.0     | 1.762 | .6867          |
| MDR5               | 110 | 1.0     | 5.0     | 2.476 | .8781          |
| MDR6               | 110 | 1.0     | 5.0     | 2.133 | .8668          |
| MDR7               | 110 | 1.0     | 5.0     | 1.619 | .8479          |
| MDR8               | 110 | 1.0     | 5.0     | 2.048 | .6561          |
| MDR9               | 110 | 1.0     | 5.0     | 3.029 | 1.2126         |
| MDR11              | 110 | 1.0     | 5.0     | 2.019 | .9998          |
| Valid N (listwise) | 110 |         |         |       |                |

```
EXAMINE VARIABLES=MDR1 MDR2 MDR3 MDR4 MDR5 MDR6 MDR7 MDR8 MDR9 MDR11
/PLOT BOXPLOT STEMLEAF NPLOT
/COMPARE GROUPS
/STATISTICS DESCRIPTIVES
/CINTERVAL 95
/MISSING LISTWISE
/NOTOTAL.
```

## Explore

#### Notes

|                |                                                                      |
|----------------|----------------------------------------------------------------------|
| Output Created | 15-SEP-2022 14:15:46                                                 |
| Comments       |                                                                      |
| Data           | C:\DBA\research paper,\German med paper\statistics\110 spss data.sav |
| Input          | DataSet1                                                             |
| Filter         | <none>                                                               |
| Weight         | <none>                                                               |

|                        |                                |                                                                                                 |             |
|------------------------|--------------------------------|-------------------------------------------------------------------------------------------------|-------------|
| Missing Value Handling | Split File                     | <none>                                                                                          |             |
|                        | N of Rows in Working Data File |                                                                                                 | 110         |
|                        | Definition of Missing          | User-defined missing values for dependent variables are treated as missing.                     |             |
|                        | Cases Used                     | Statistics are based on cases with no missing values for any dependent variable or factor used. |             |
| Syntax                 |                                | EXAMINE VARIABLES=MDR1 MDR2 MDR3 MDR4 MDR5 MDR6 MDR7 MDR8 MDR9 MDR11                            |             |
|                        |                                | /PLOT BOXPLOT STEMLEAF                                                                          |             |
|                        |                                | NPLOT                                                                                           |             |
|                        |                                | /COMPARE GROUPS                                                                                 |             |
| Resources              |                                | /STATISTICS DESCRIPTIVES                                                                        |             |
|                        |                                | /INTERVAL 95                                                                                    |             |
|                        |                                | /MISSING LISTWISE                                                                               |             |
|                        |                                | /NOTOTAL.                                                                                       |             |
| Resources              | Processor Time                 |                                                                                                 | 00:00:04.52 |
|                        | Elapsed Time                   |                                                                                                 | 00:00:04.11 |

[DataSet1] C:\DBA\research paper,\German med paper\statistics\110 spss data.sav

**Case Processing Summary**

|       | Cases |         |         |         |       |         |
|-------|-------|---------|---------|---------|-------|---------|
|       | Valid |         | Missing |         | Total |         |
|       | N     | Percent | N       | Percent | N     | Percent |
| MDR1  | 110   | 100.0%  | 0       | 0.0%    | 110   | 100.0%  |
| MDR2  | 110   | 100.0%  | 0       | 0.0%    | 110   | 100.0%  |
| MDR3  | 110   | 100.0%  | 0       | 0.0%    | 110   | 100.0%  |
| MDR4  | 110   | 100.0%  | 0       | 0.0%    | 110   | 100.0%  |
| MDR5  | 110   | 100.0%  | 0       | 0.0%    | 110   | 100.0%  |
| MDR6  | 110   | 100.0%  | 0       | 0.0%    | 110   | 100.0%  |
| MDR7  | 110   | 100.0%  | 0       | 0.0%    | 110   | 100.0%  |
| MDR8  | 110   | 100.0%  | 0       | 0.0%    | 110   | 100.0%  |
| MDR9  | 110   | 100.0%  | 0       | 0.0%    | 110   | 100.0%  |
| MDR11 | 110   | 100.0%  | 0       | 0.0%    | 110   | 100.0%  |

**Descriptives**

|      |                             |             | Statistic | Std. Error |
|------|-----------------------------|-------------|-----------|------------|
| MDR1 | Mean                        |             | 4.067     | .0848      |
|      | 95% Confidence Interval for | Lower Bound | 3.898     |            |
|      | Mean                        | Upper Bound | 4.235     |            |
|      | 5% Trimmed Mean             |             | 4.161     |            |
|      | Median                      |             | 4.000     |            |
|      | Variance                    |             | .755      |            |
|      | Std. Deviation              |             | .8690     |            |
|      | Minimum                     |             | 1.0       |            |
|      | Maximum                     |             | 5.0       |            |
|      | Range                       |             | 4.0       |            |
|      | Interquartile Range         |             | 1.0       |            |
|      | Skewness                    |             | -1.565    | .236       |
|      | Kurtosis                    |             | 3.500     | .467       |
|      | Mean                        |             | 2.048     | .0695      |
| MDR2 | 95% Confidence Interval for | Lower Bound | 1.910     |            |
|      | Mean                        | Upper Bound | 2.185     |            |
|      | 5% Trimmed Mean             |             | 1.987     |            |
|      | Median                      |             | 2.000     |            |
|      | Variance                    |             | .507      |            |
|      | Std. Deviation              |             | .7123     |            |
|      | Minimum                     |             | 1.0       |            |
|      | Maximum                     |             | 5.0       |            |
|      | Range                       |             | 4.0       |            |
|      | Interquartile Range         |             | .0        |            |
|      | Skewness                    |             | 1.396     | .236       |
|      | Kurtosis                    |             | 3.817     | .467       |
|      | Mean                        |             | 2.400     | .0852      |
|      | 95% Confidence Interval for | Lower Bound | 2.231     |            |
| MDR3 | Mean                        | Upper Bound | 2.569     |            |
|      | 5% Trimmed Mean             |             | 2.378     |            |
|      | Median                      |             | 2.000     |            |
|      | Variance                    |             | .762      |            |
|      | Std. Deviation              |             | .8727     |            |
|      | Minimum                     |             | 1.0       |            |
|      | Maximum                     |             | 5.0       |            |
|      | Range                       |             | 4.0       |            |
|      | Interquartile Range         |             | 1.0       |            |
|      | Skewness                    |             | .535      | .236       |

|      |                             |             |        |       |
|------|-----------------------------|-------------|--------|-------|
| MDR4 | Kurtosis                    |             | - .009 | .467  |
|      | Mean                        |             | 1.762  | .0670 |
|      | 95% Confidence Interval for | Lower Bound | 1.629  |       |
|      | Mean                        | Upper Bound | 1.895  |       |
|      | 5% Trimmed Mean             |             | 1.704  |       |
|      | Median                      |             | 2.000  |       |
|      | Variance                    |             | .472   |       |
|      | Std. Deviation              |             | .6867  |       |
|      | Minimum                     |             | 1.0    |       |
|      | Maximum                     |             | 5.0    |       |
|      | Range                       |             | 4.0    |       |
|      | Interquartile Range         |             | 1.0    |       |
|      | Skewness                    |             | 1.255  | .236  |
|      | Kurtosis                    |             | 4.306  | .467  |
| MDR5 | Mean                        |             | 2.476  | .0857 |
|      | 95% Confidence Interval for | Lower Bound | 2.306  |       |
|      | Mean                        | Upper Bound | 2.646  |       |
|      | 5% Trimmed Mean             |             | 2.452  |       |
|      | Median                      |             | 2.000  |       |
|      | Variance                    |             | .771   |       |
|      | Std. Deviation              |             | .8781  |       |
|      | Minimum                     |             | 1.0    |       |
|      | Maximum                     |             | 5.0    |       |
|      | Range                       |             | 4.0    |       |
|      | Interquartile Range         |             | 1.0    |       |
|      | Skewness                    |             | .378   | .236  |
|      | Kurtosis                    |             | .197   | .467  |
|      | Mean                        |             | 2.133  | .0846 |
| MDR6 | 95% Confidence Interval for | Lower Bound | 1.966  |       |
|      | Mean                        | Upper Bound | 2.301  |       |
|      | 5% Trimmed Mean             |             | 2.061  |       |
|      | Median                      |             | 2.000  |       |
|      | Variance                    |             | .751   |       |
|      | Std. Deviation              |             | .8668  |       |
|      | Minimum                     |             | 1.0    |       |
|      | Maximum                     |             | 5.0    |       |
|      | Range                       |             | 4.0    |       |
|      | Interquartile Range         |             | .0     |       |
|      | Skewness                    |             | 1.453  | .236  |
|      | Kurtosis                    |             | 2.690  | .467  |
|      | Mean                        |             | 1.619  | .0827 |
| MDR7 | 95% Confidence Interval for | Lower Bound | 1.455  |       |
|      | Mean                        | Upper Bound | 1.783  |       |

|       |                             |             |        |       |
|-------|-----------------------------|-------------|--------|-------|
| MDR8  | 5% Trimmed Mean             |             | 1.503  |       |
|       | Median                      |             | 1.000  |       |
|       | Variance                    |             | .719   |       |
|       | Std. Deviation              |             | .8479  |       |
|       | Minimum                     |             | 1.0    |       |
|       | Maximum                     |             | 5.0    |       |
|       | Range                       |             | 4.0    |       |
|       | Interquartile Range         |             | 1.0    |       |
|       | Skewness                    |             | 1.886  | .236  |
|       | Kurtosis                    |             | 4.429  | .467  |
|       | Mean                        |             | 2.048  | .0640 |
|       | 95% Confidence Interval for | Lower Bound | 1.921  |       |
|       | Mean                        | Upper Bound | 2.175  |       |
|       | 5% Trimmed Mean             |             | 2.021  |       |
|       | Median                      |             | 2.000  |       |
|       | Variance                    |             | .430   |       |
|       | Std. Deviation              |             | .6561  |       |
|       | Minimum                     |             | 1.0    |       |
|       | Maximum                     |             | 5.0    |       |
|       | Range                       |             | 4.0    |       |
|       | Interquartile Range         |             | .0     |       |
|       | Skewness                    |             | .993   | .236  |
|       | Kurtosis                    |             | 3.672  | .467  |
|       | Mean                        |             | 3.029  | .1183 |
| MDR9  | 95% Confidence Interval for | Lower Bound | 2.794  |       |
|       | Mean                        | Upper Bound | 3.263  |       |
|       | 5% Trimmed Mean             |             | 3.032  |       |
|       | Median                      |             | 3.000  |       |
|       | Variance                    |             | 1.470  |       |
|       | Std. Deviation              |             | 1.2126 |       |
|       | Minimum                     |             | 1.0    |       |
|       | Maximum                     |             | 5.0    |       |
|       | Range                       |             | 4.0    |       |
|       | Interquartile Range         |             | 2.0    |       |
|       | Skewness                    |             | -.319  | .236  |
|       | Kurtosis                    |             | -.983  | .467  |
|       | Mean                        |             | 2.019  | .0976 |
|       | 95% Confidence Interval for | Lower Bound | 1.826  |       |
|       | Mean                        | Upper Bound | 2.213  |       |
| MDR11 | 5% Trimmed Mean             |             | 1.934  |       |
|       | Median                      |             | 2.000  |       |
|       | Variance                    |             | 1.000  |       |
|       |                             |             |        |       |



```
5 . 00000000000000000000000000000000
```

```
Stem width:      1.0
Each leaf:       1 case(s)
```

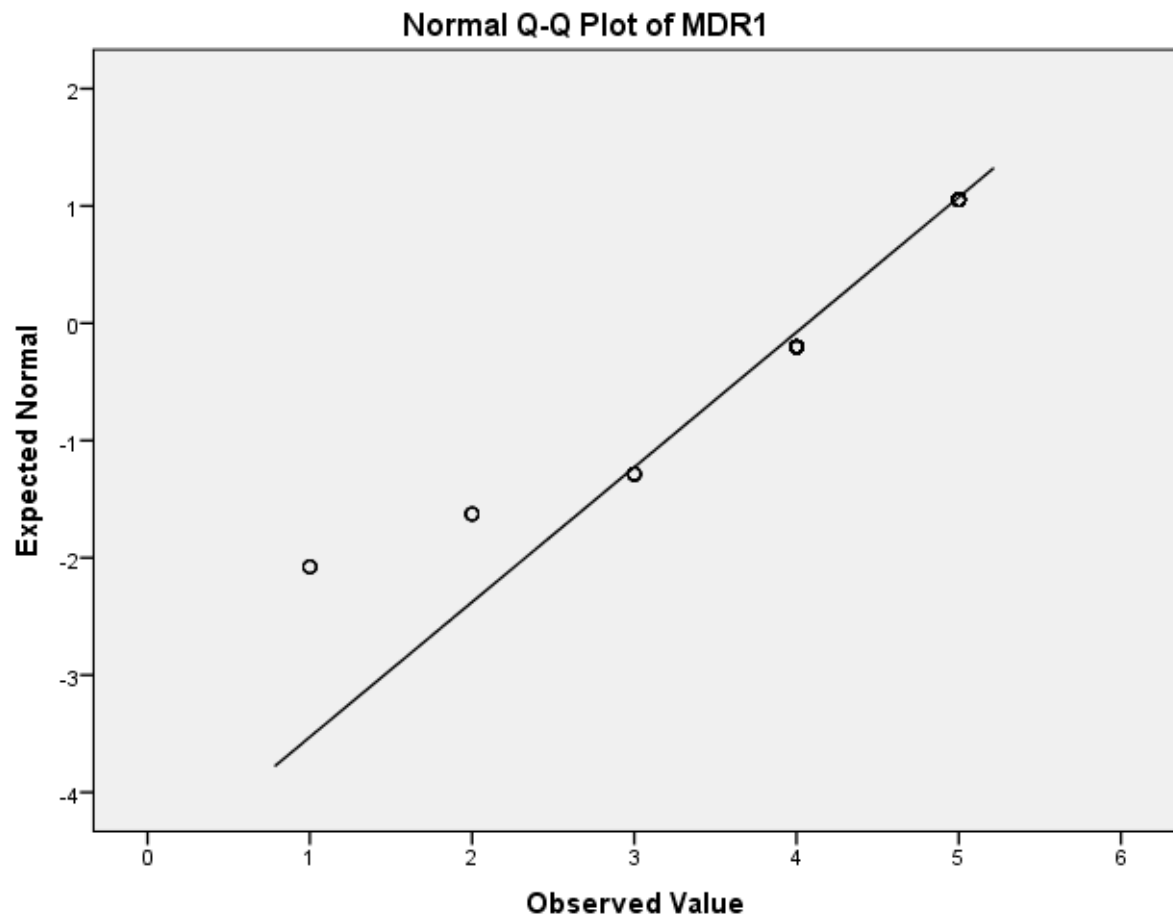



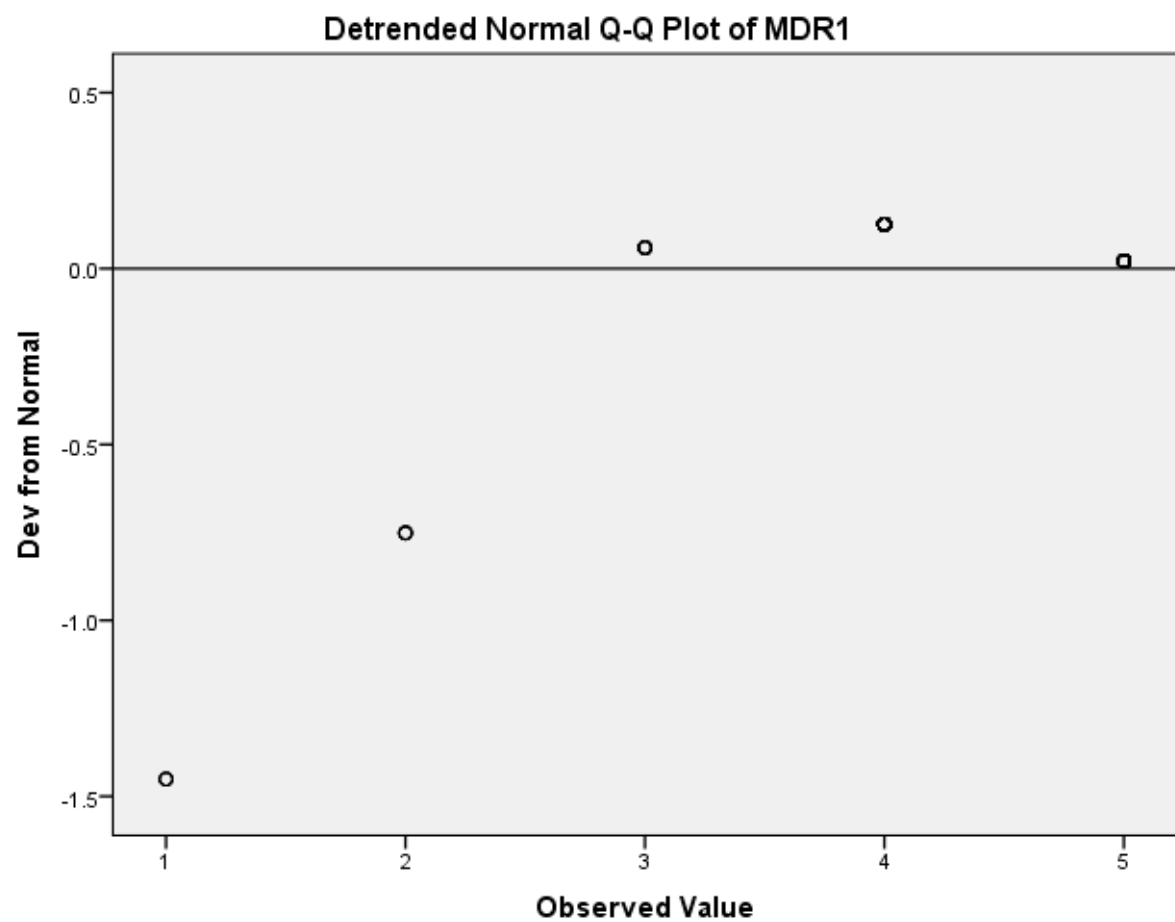

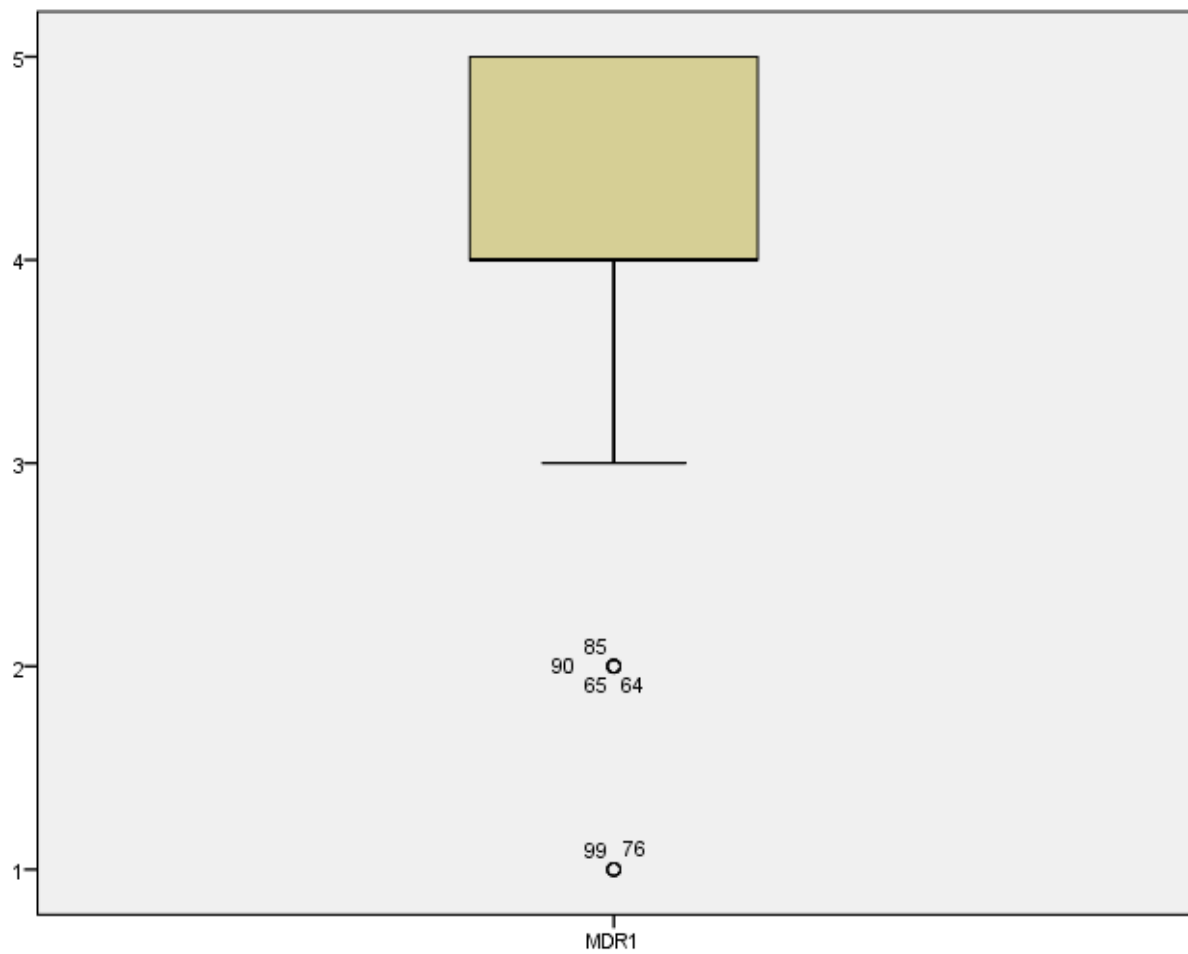

## MDR2

MDR2 Stem-and-Leaf Plot

[illegible]

Normal Q-Q Plot of MDR2

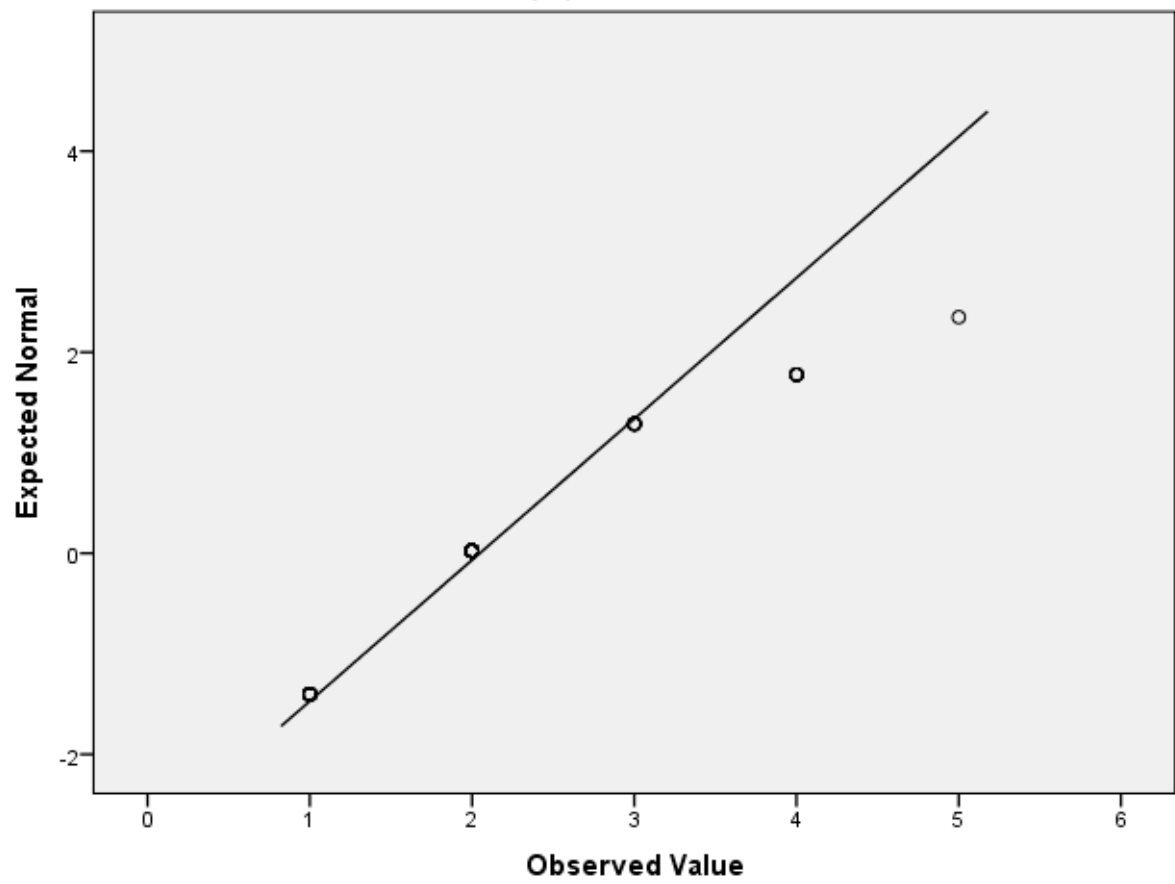

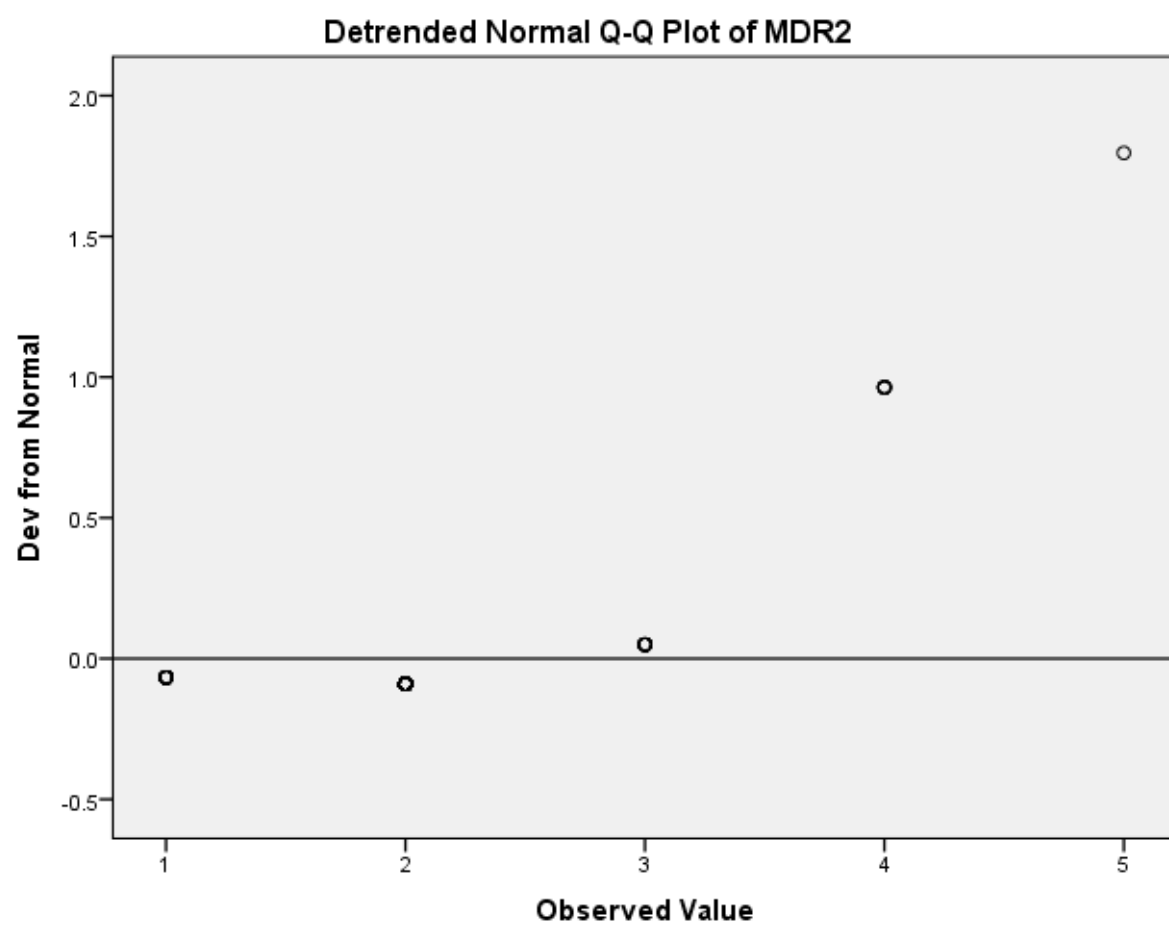

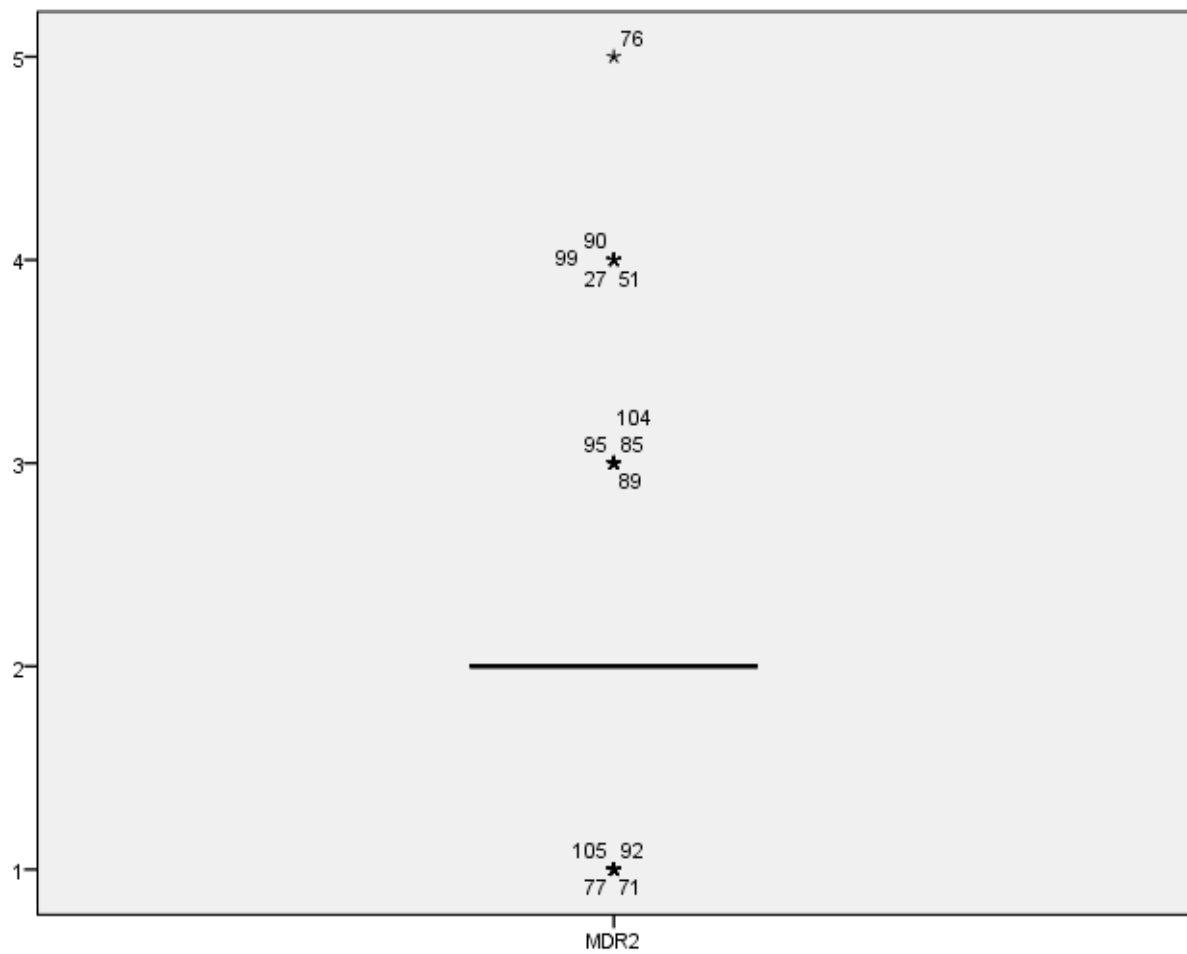

## MDR3

MDR3 Stem-and-Leaf Plot

[illegible]

```
12.00      4 . 0000000000000
1.00 Extremes    (>=5.0)
```

```
Stem width:      1.0
Each leaf:       1 case(s)
```

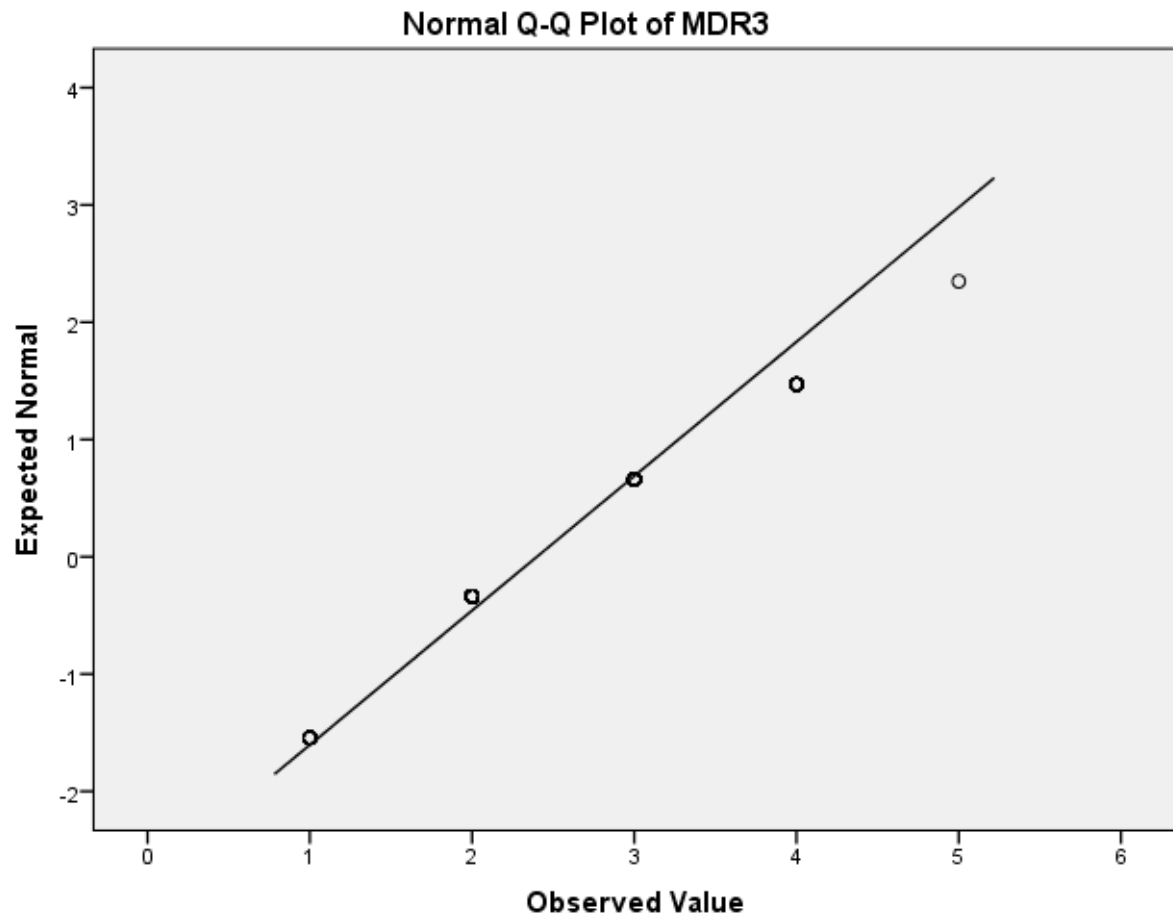

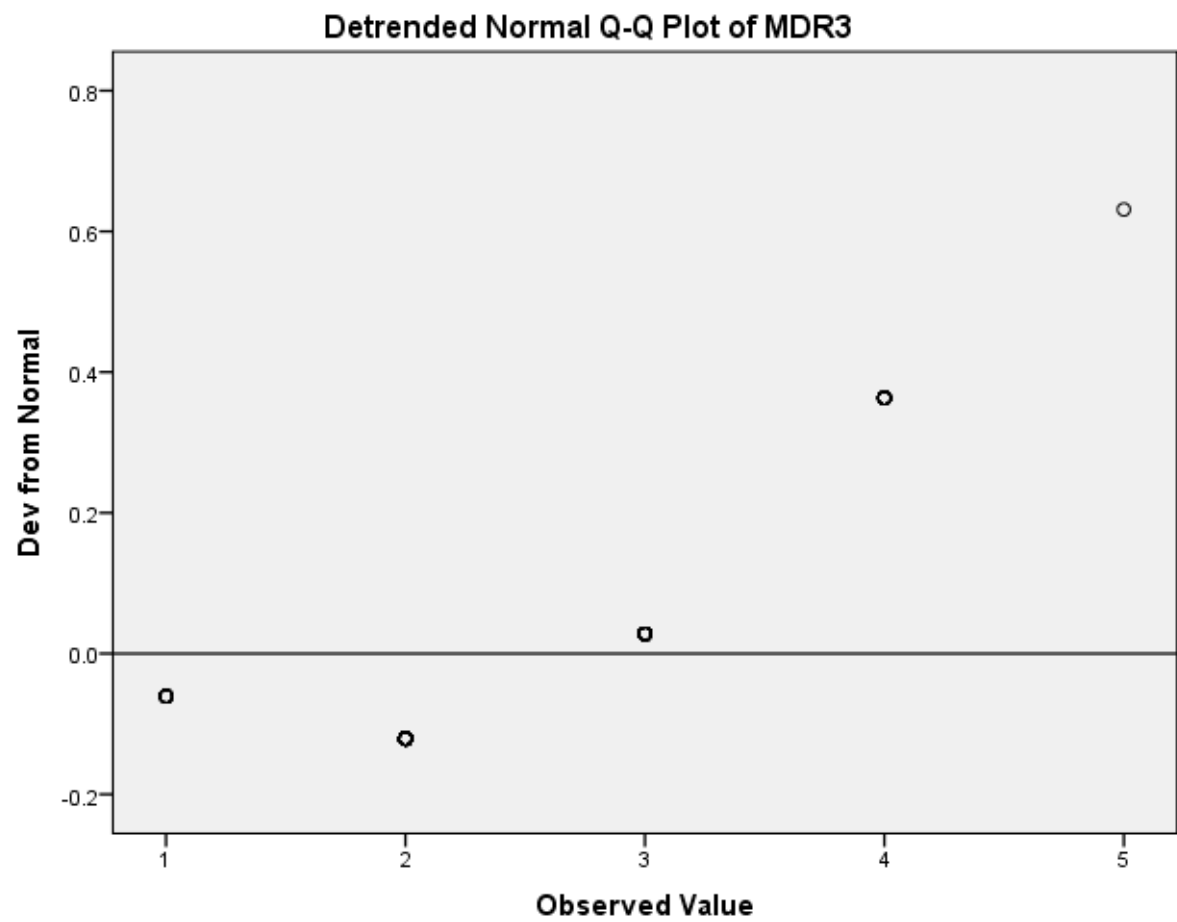

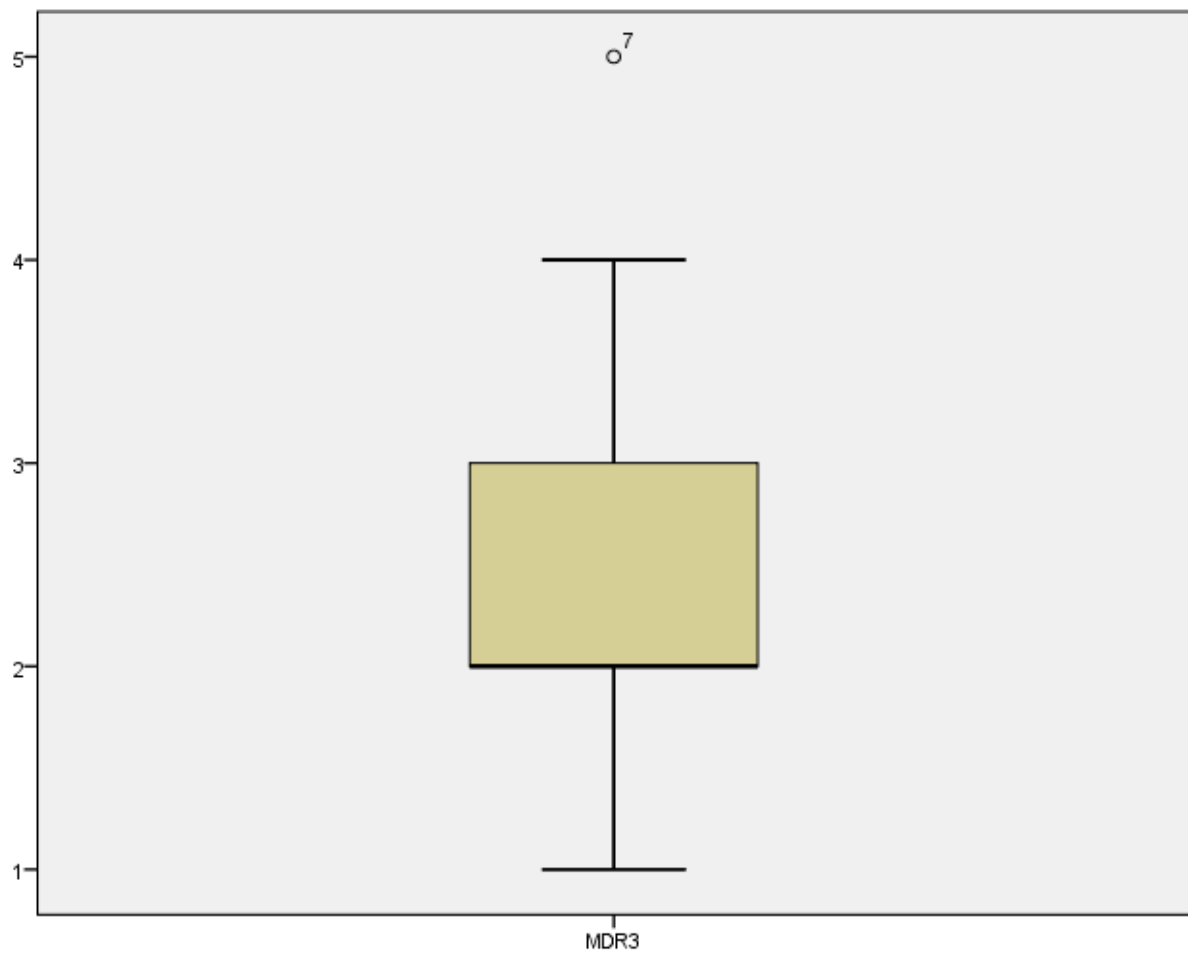

## MDR4

MDR4 Stem-and-Leaf Plot

```

Frequency      Stem &  Leaf

  36.00        1 .  0000000000000000000000000000000000
   .00         1 .
   .00         1 .
   .00         1 .
   .00         1 .
  61.00        2 .
00000000000000000000000000000000000000000000000000000
   .00         2 .
   .00         2 .
   .00         2 .
   .00         2 .
   6.00        3 .  000000
   2.00 Extremes    (>=4.0)

Stem width:      1.0

```



Each leaf: 1 case(s)

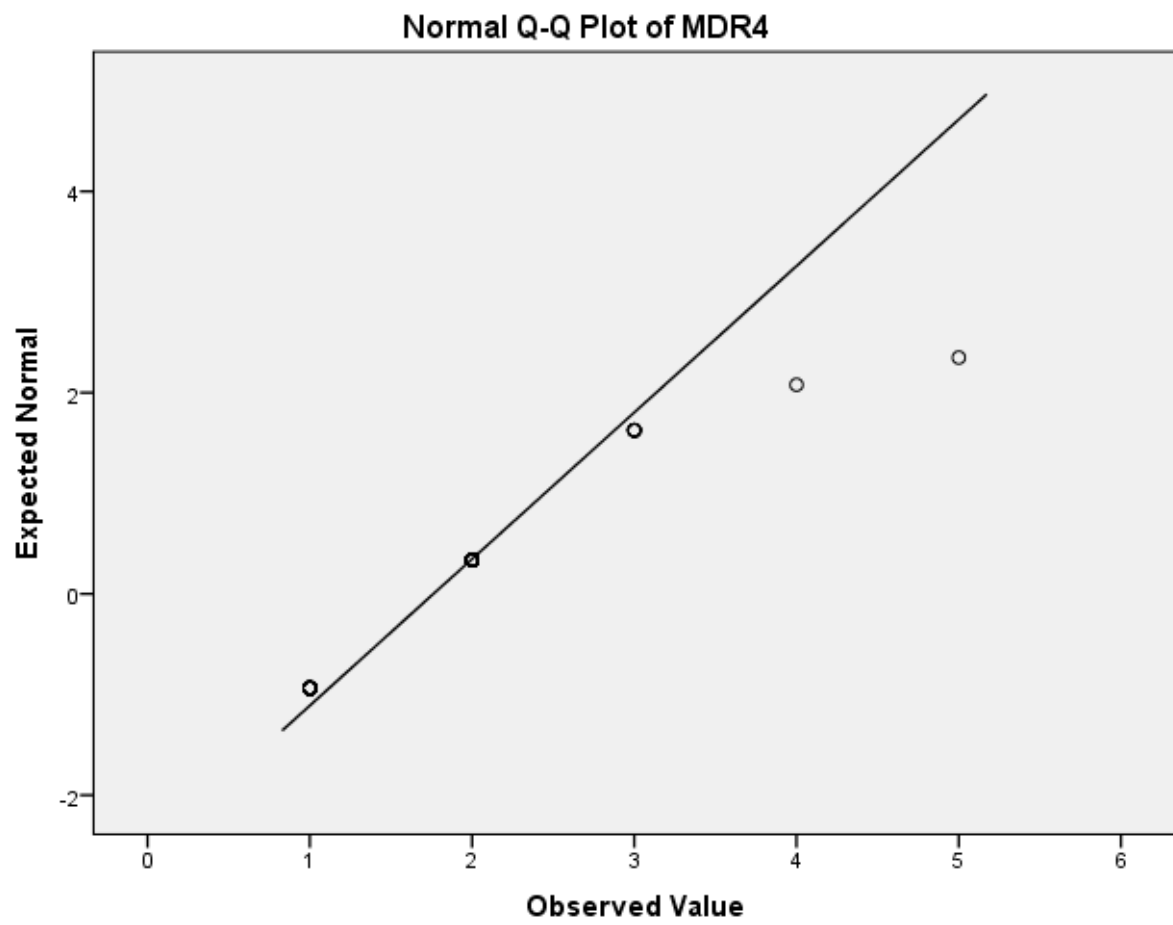

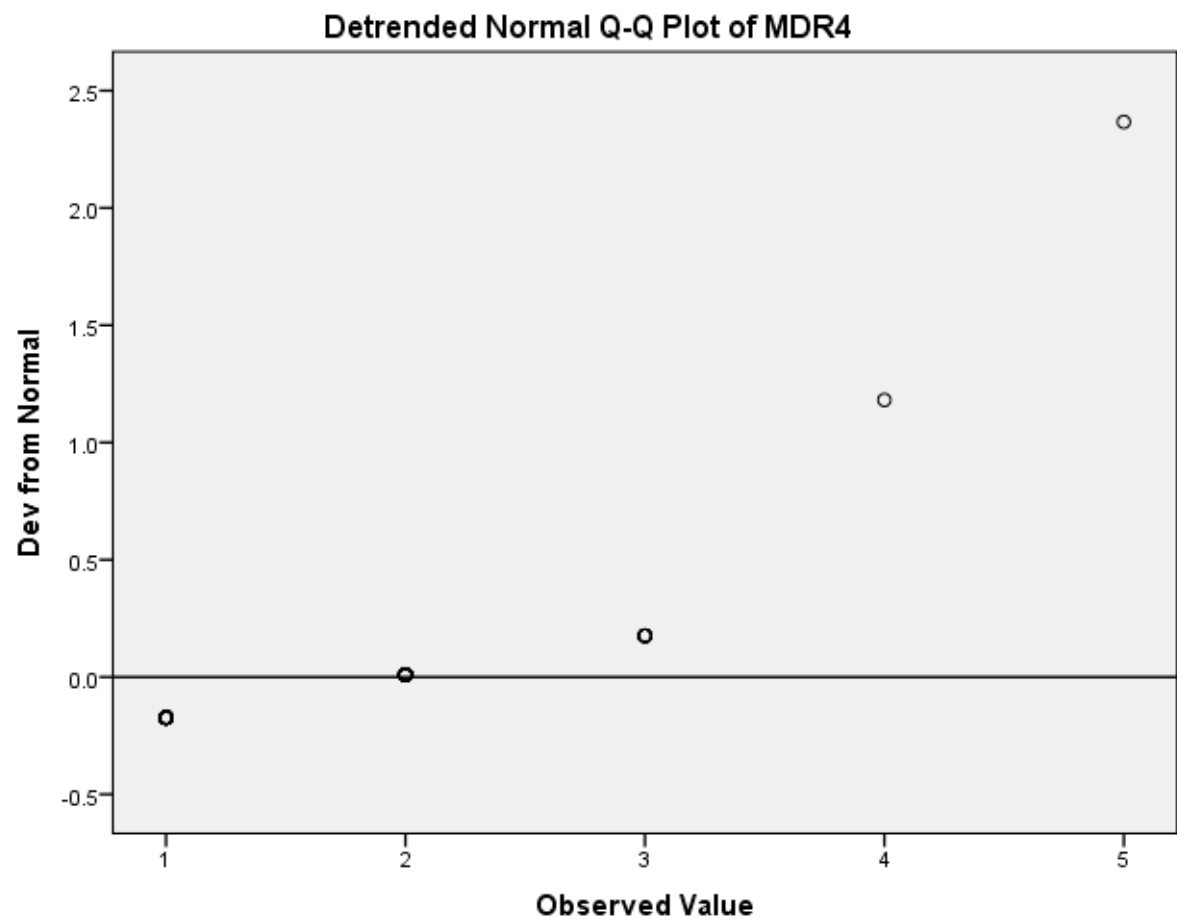

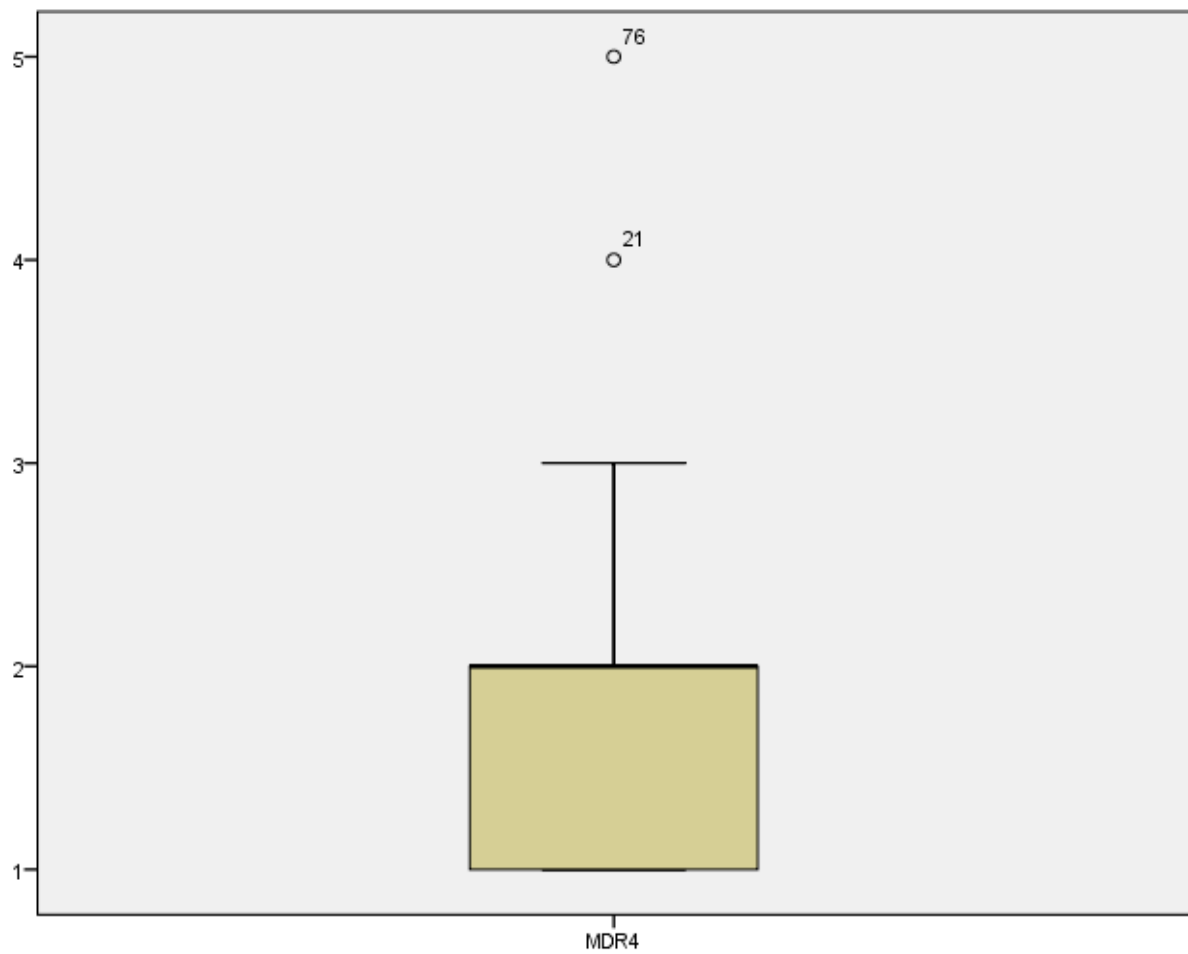

## MDR5

MDR5 Stem-and-Leaf Plot

[illegible]

```
9.00      4 . 0000000000
2.00 Extremes    (>=5.0)
```

```
Stem width:      1.0
Each leaf:       1 case(s)
```

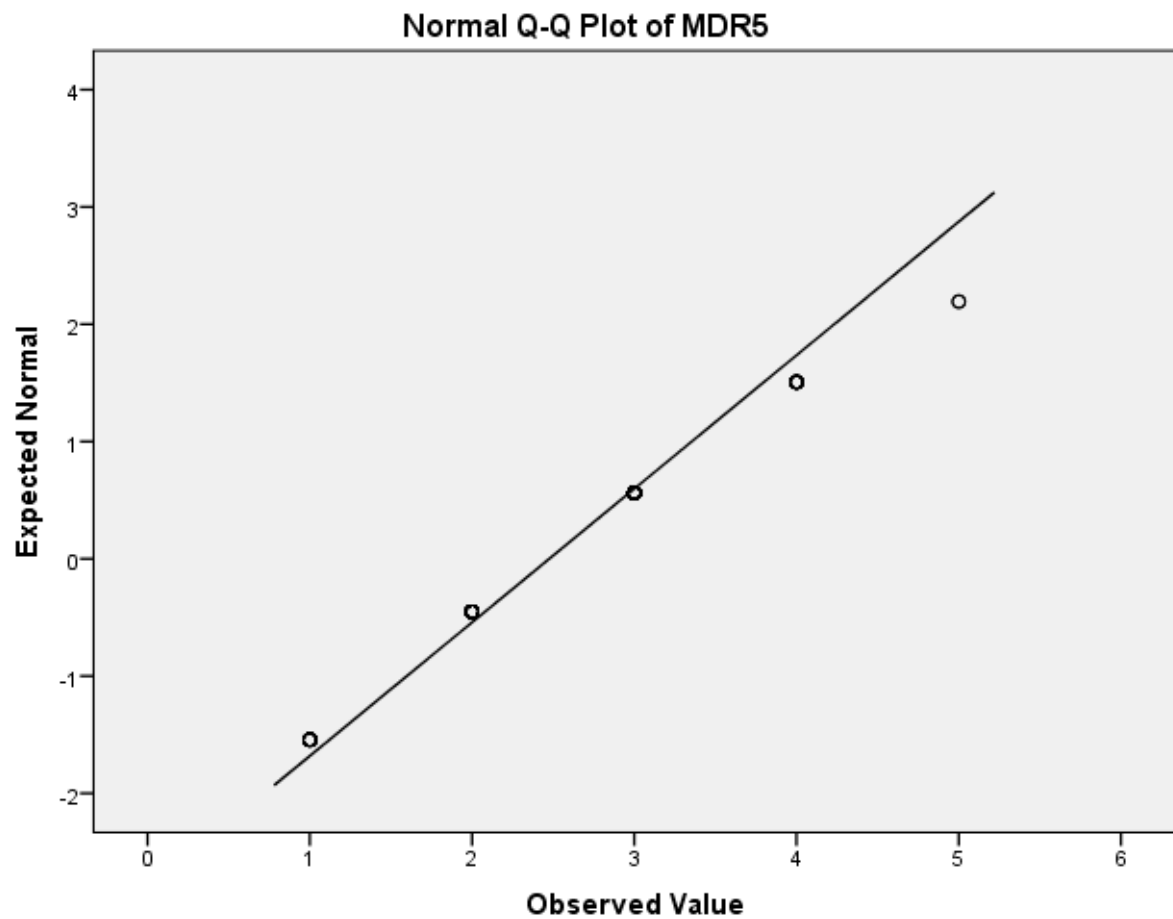

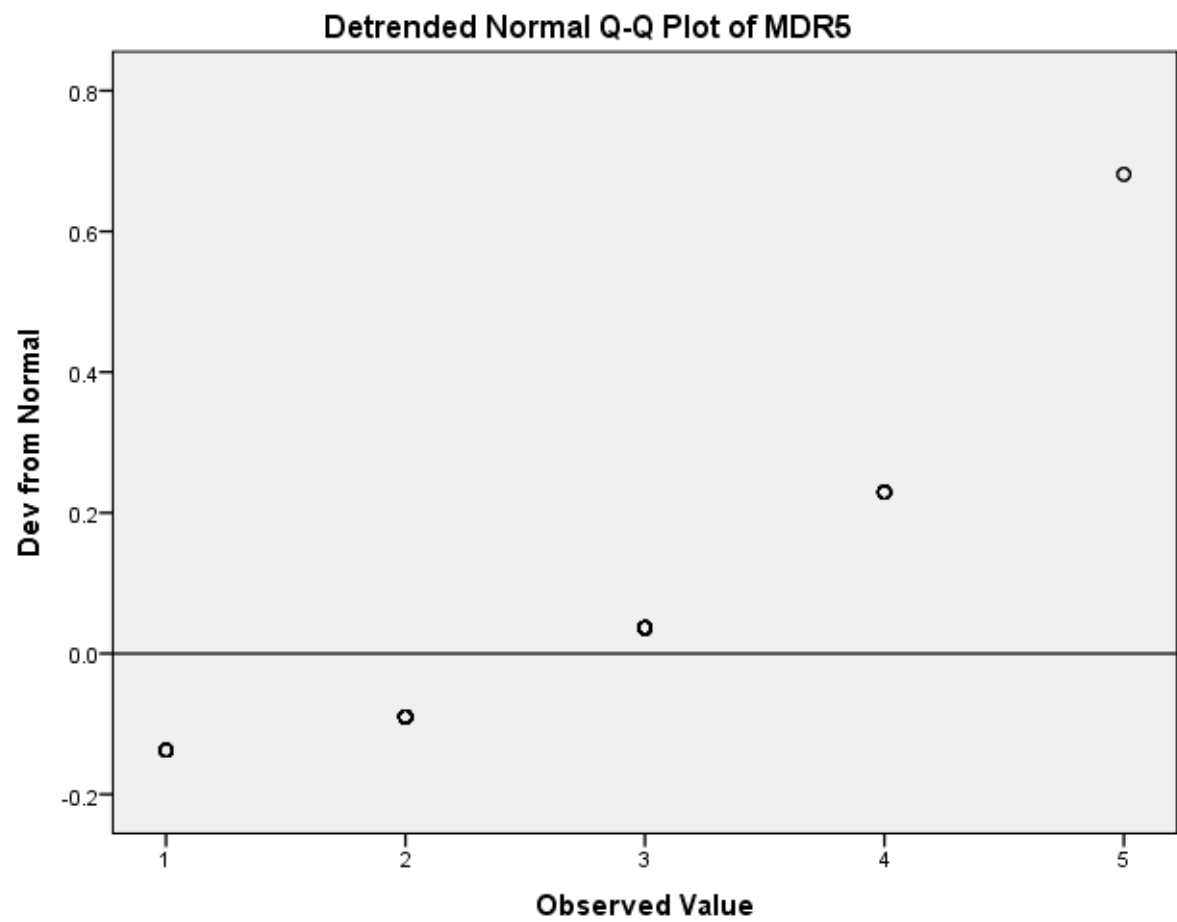

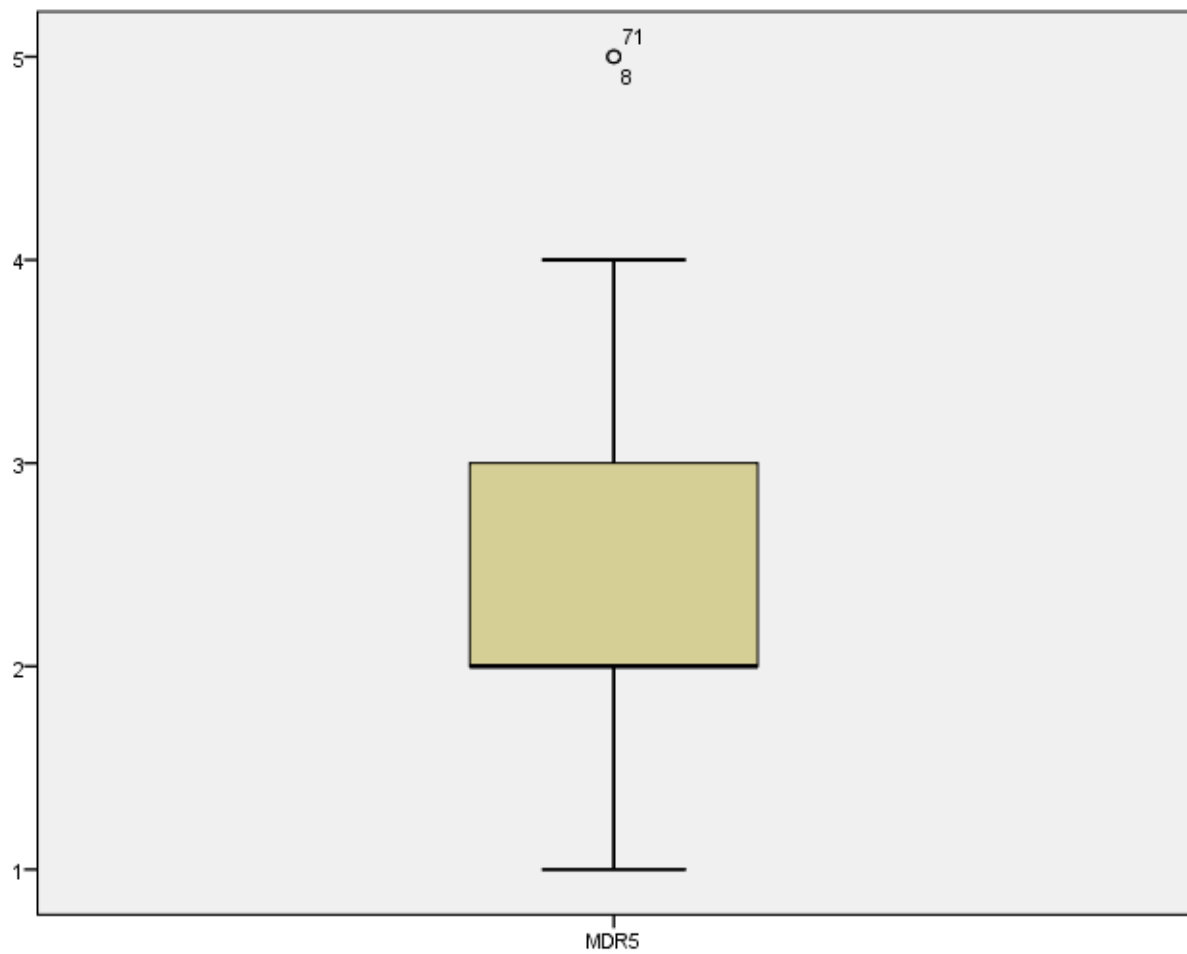

## MDR6

MDR6 Stem-and-Leaf Plot

[illegible]

Normal Q-Q Plot of MDR6

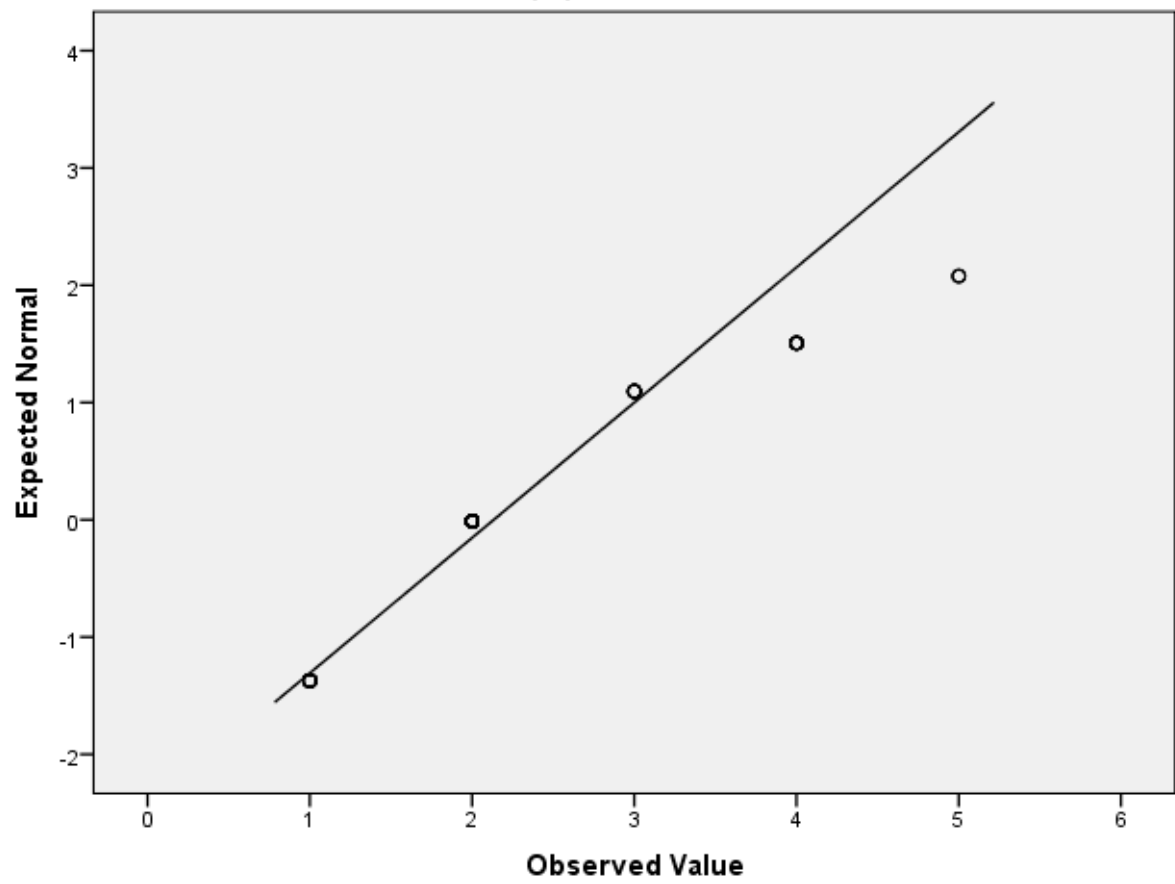

Detrended Normal Q-Q Plot of MDR6

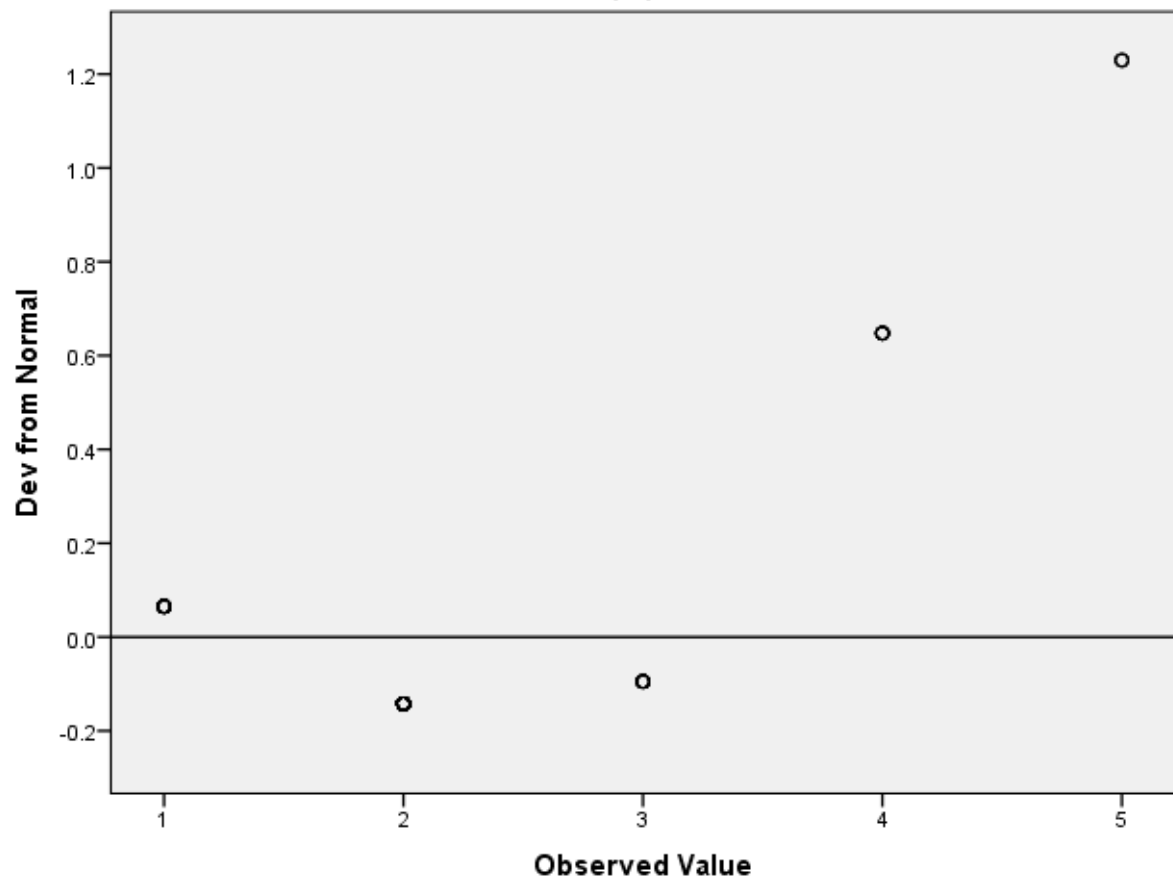



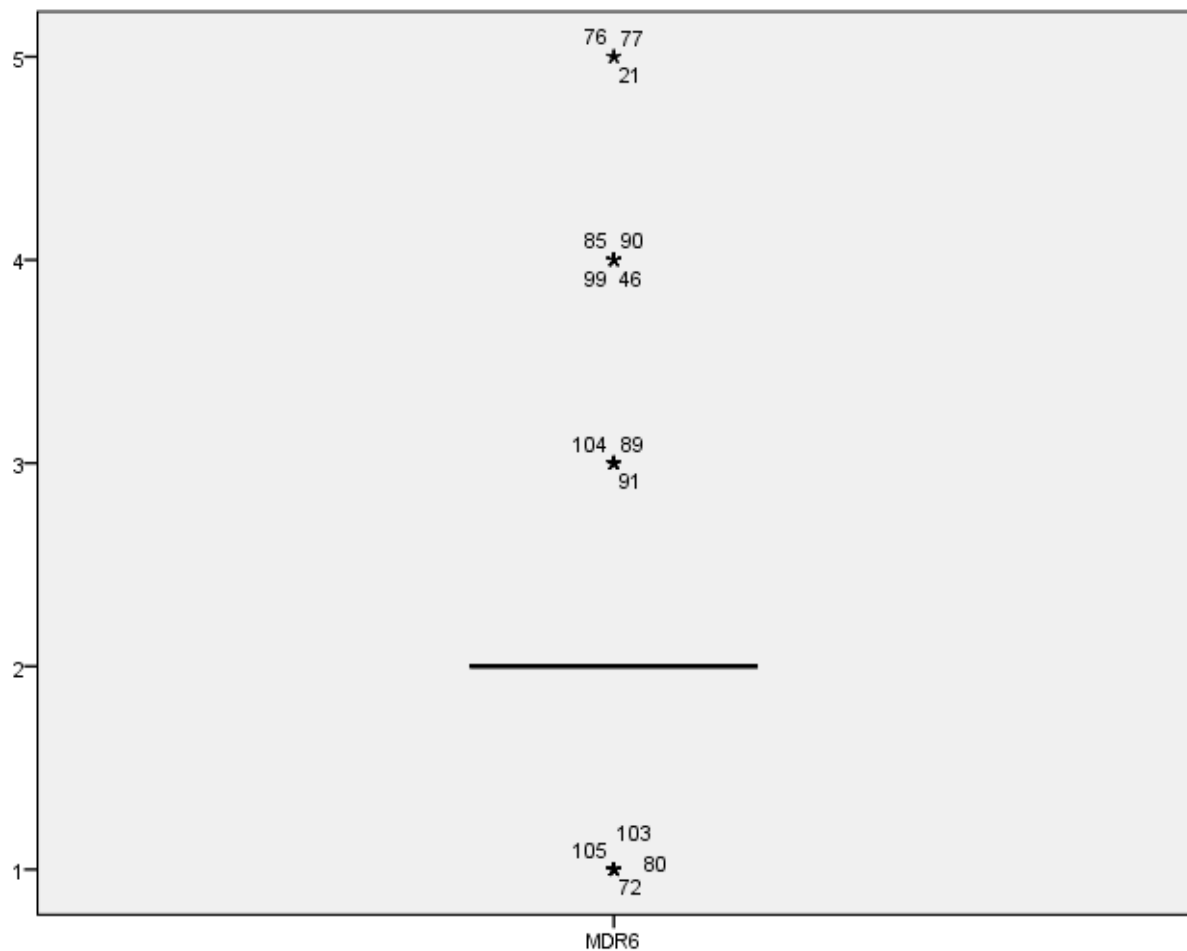

## MDR7

MDR7 Stem-and-Leaf Plot

[illegible]

Each leaf: 1 case(s)

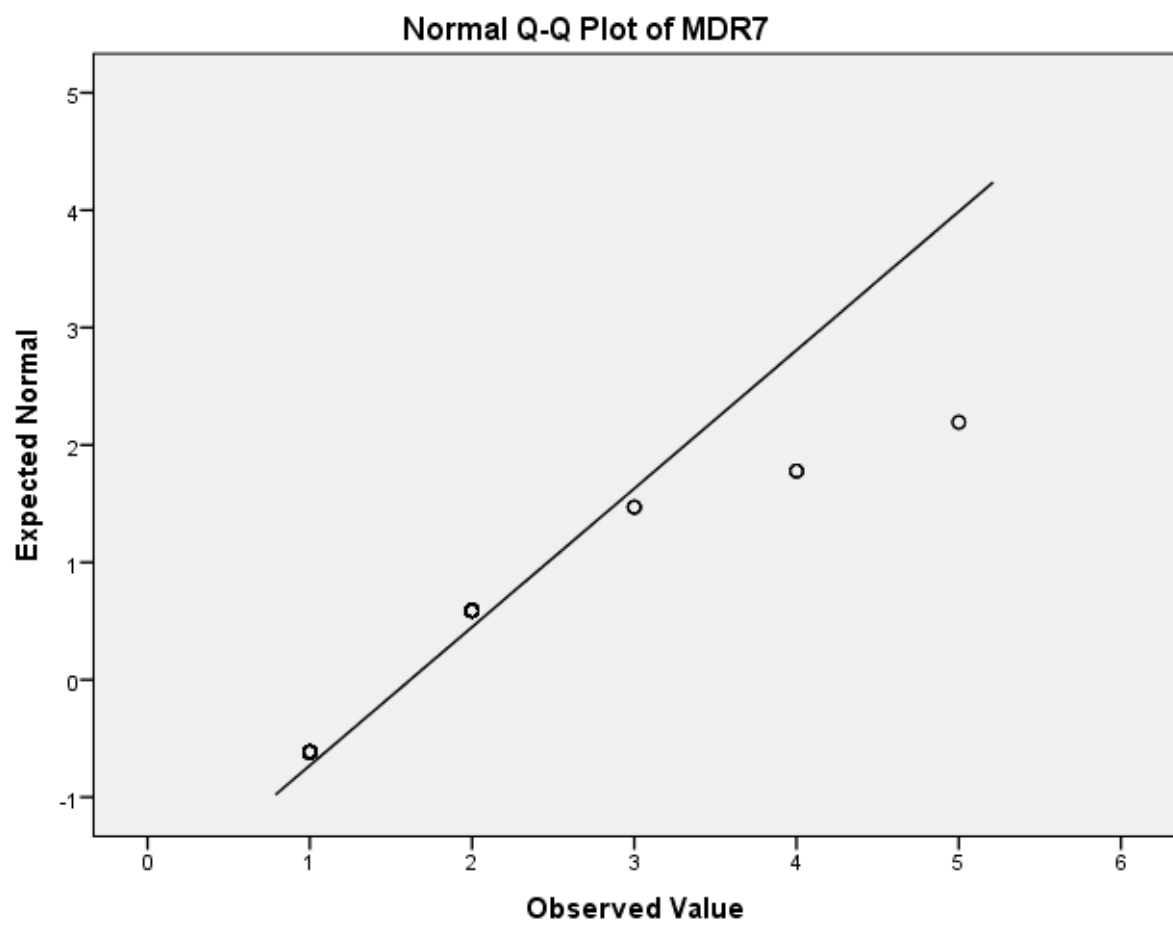

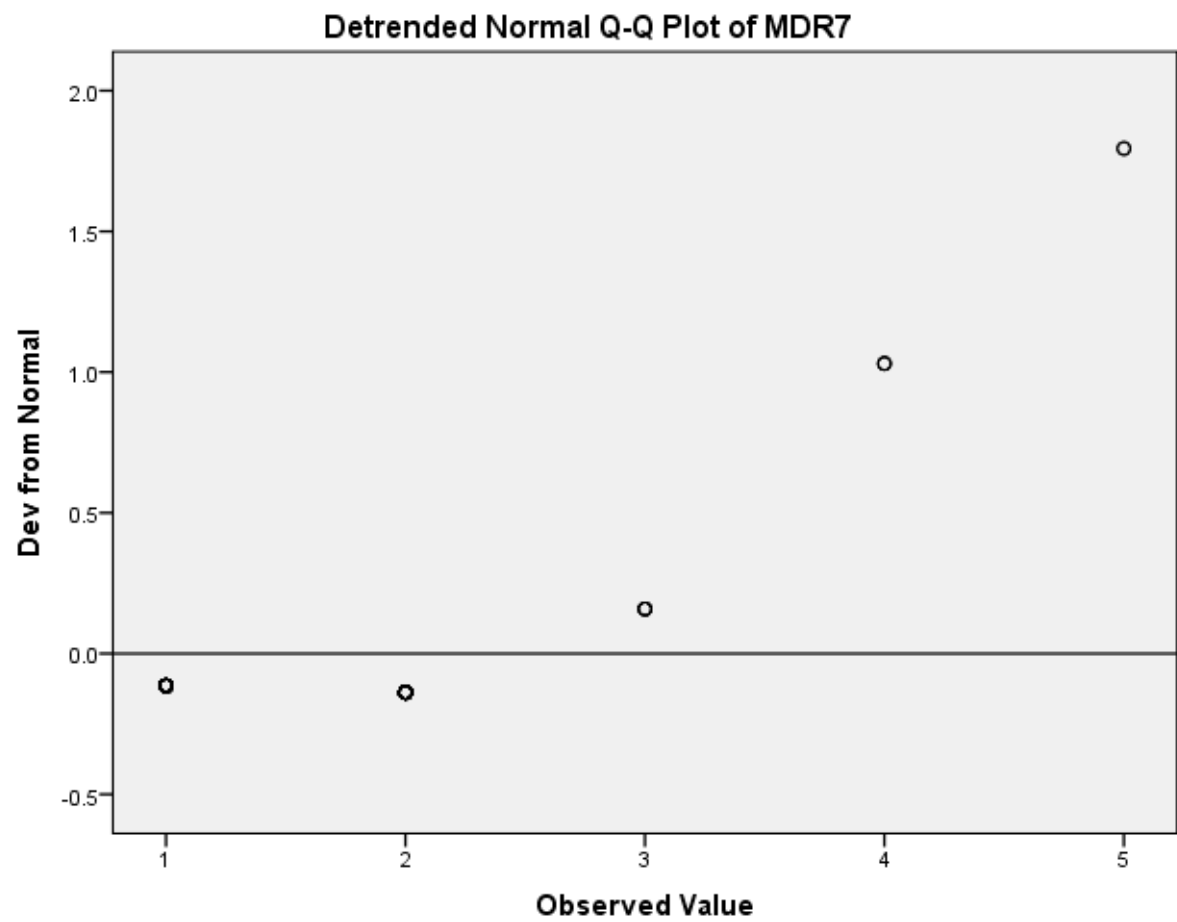

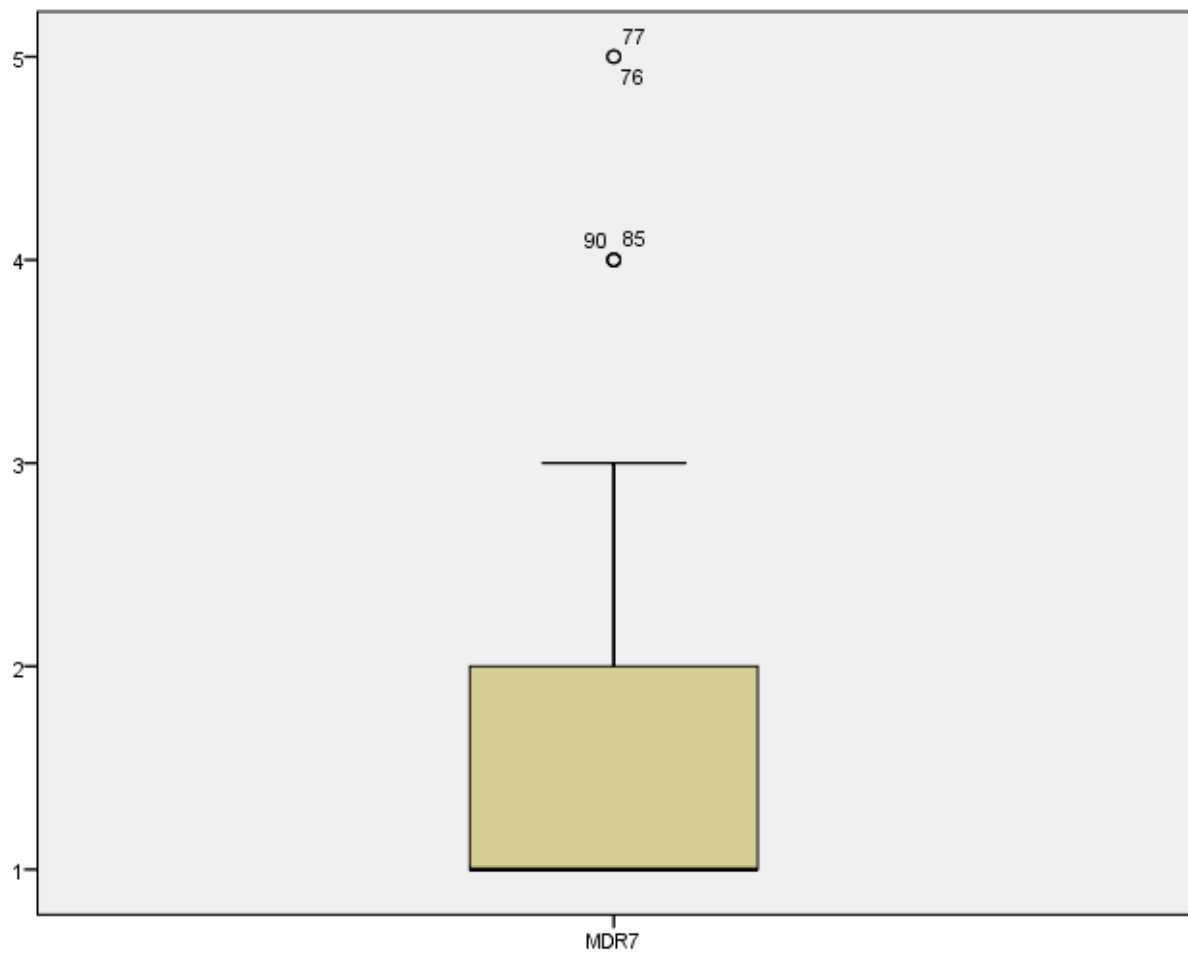

## MDR8

MDR8 Stem-and-Leaf Plot

[illegible]

Normal Q-Q Plot of MDR8

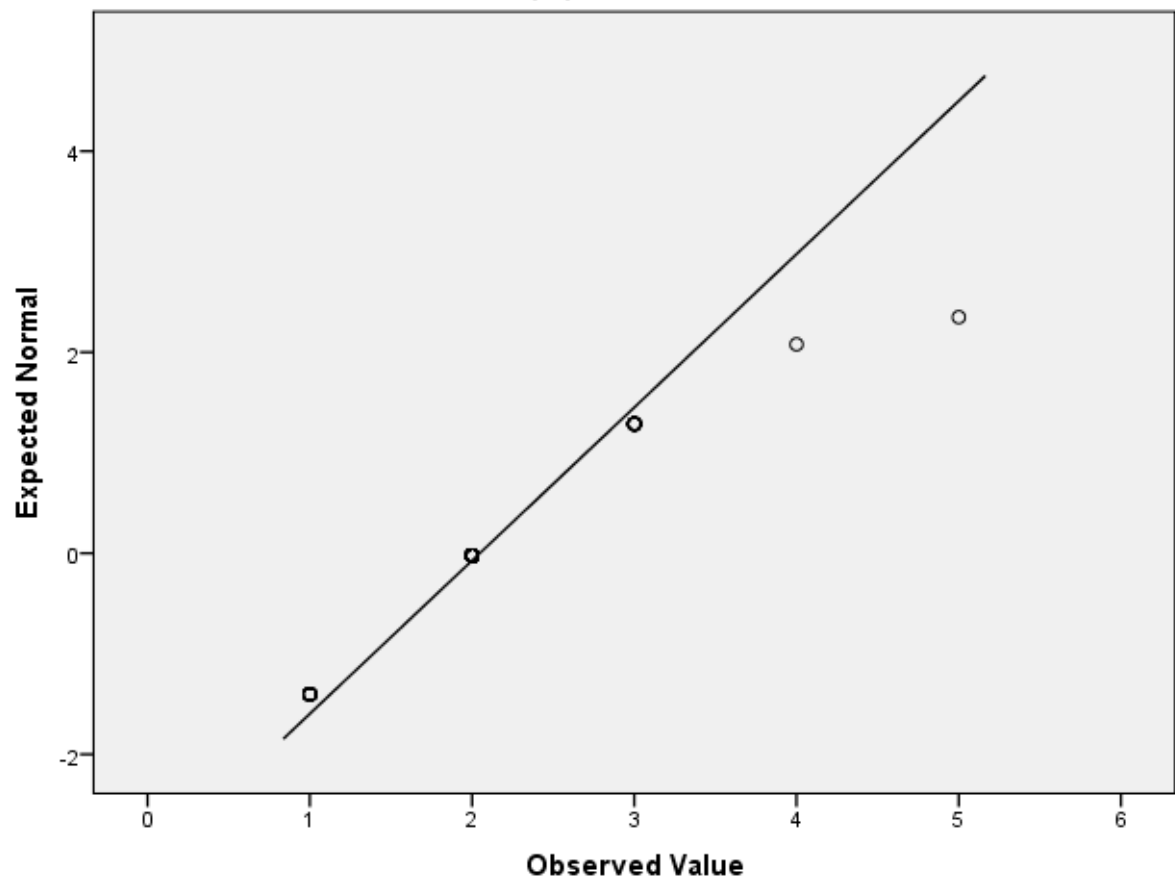

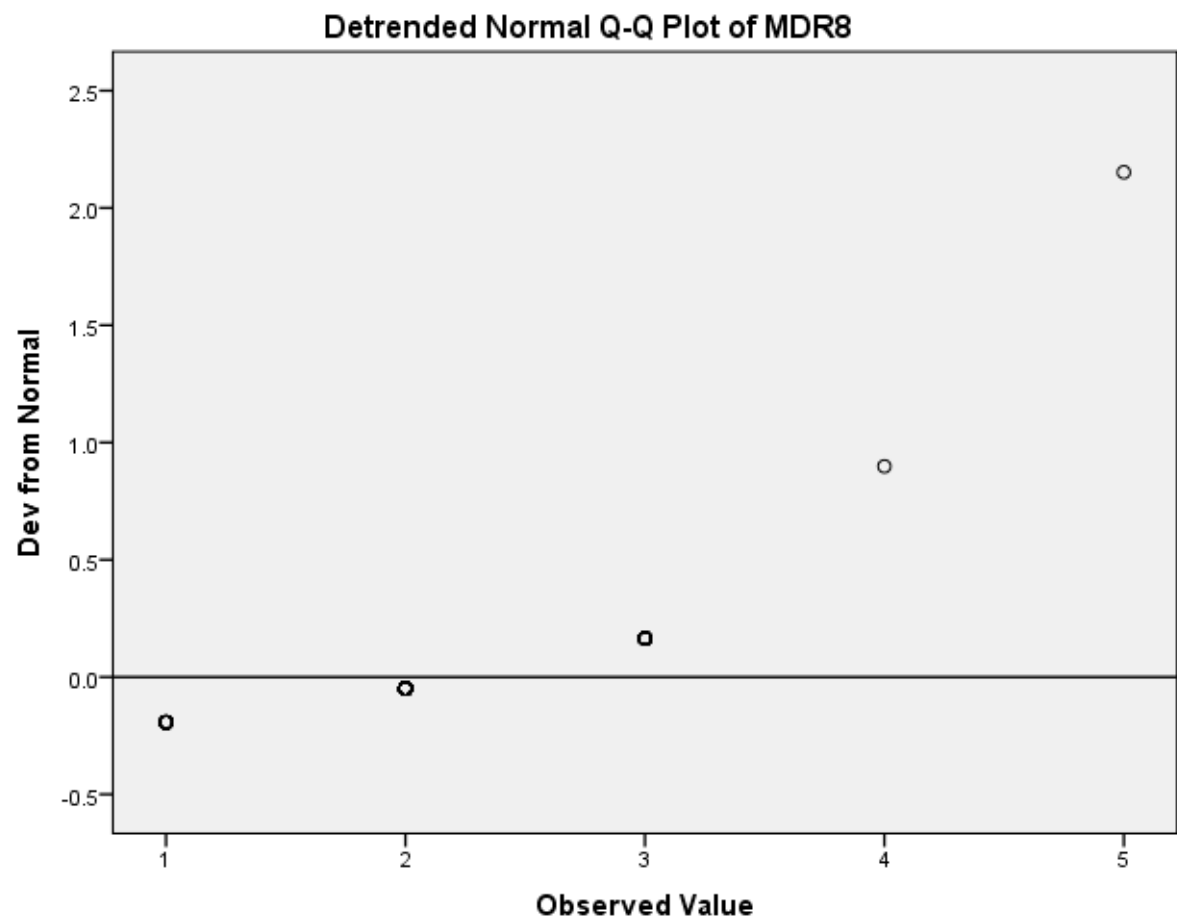

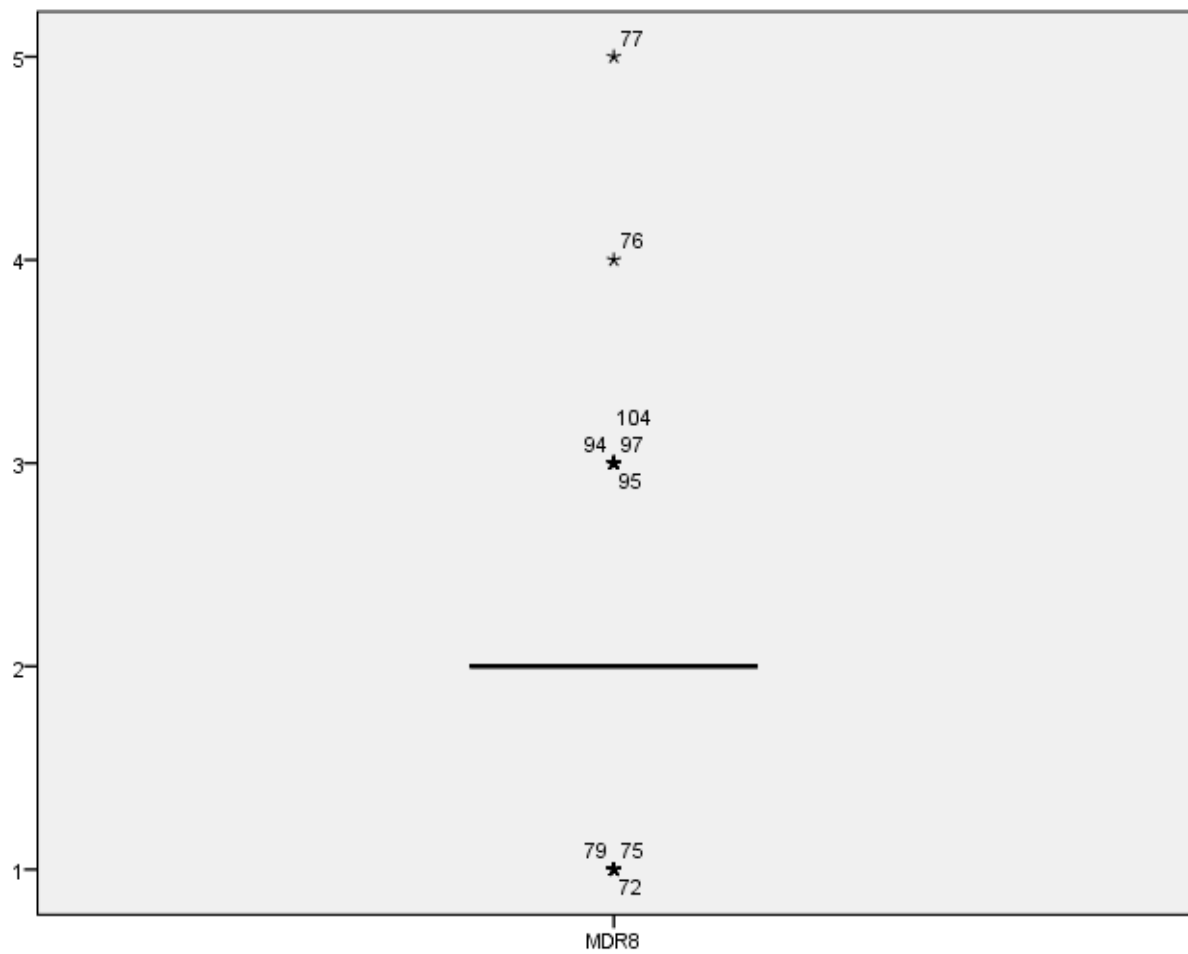

## MDR9

MDR9 Stem-and-Leaf Plot

| Frequency   | Stem &    | Leaf                                              |
|-------------|-----------|---------------------------------------------------|
| 16.00       | 1 .       | 0000000000000000                                  |
| .00         | 1 .       |                                                   |
| 19.00       | 2 .       | 000000000000000000                                |
| .00         | 2 .       |                                                   |
| 24.00       | 3 .       | 00000000000000000000                              |
| .00         | 3 .       |                                                   |
| 38.00       | 4 .       | 0000000000000000000000000000000000000000000000000 |
| .00         | 4 .       |                                                   |
| 8.00        | 5 .       | 00000000                                          |
| Stem width: | 1.0       |                                                   |
| Each leaf:  | 1 case(s) |                                                   |

Normal Q-Q Plot of MDR9

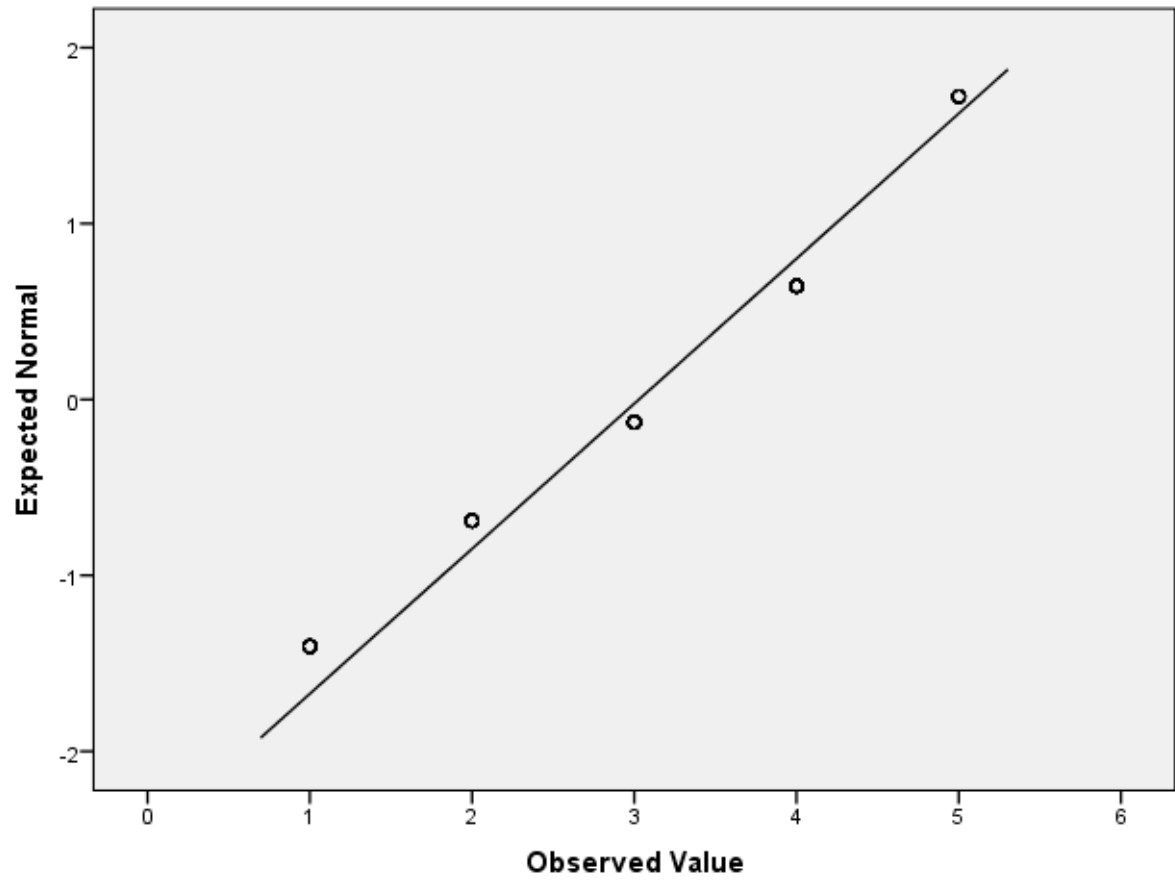



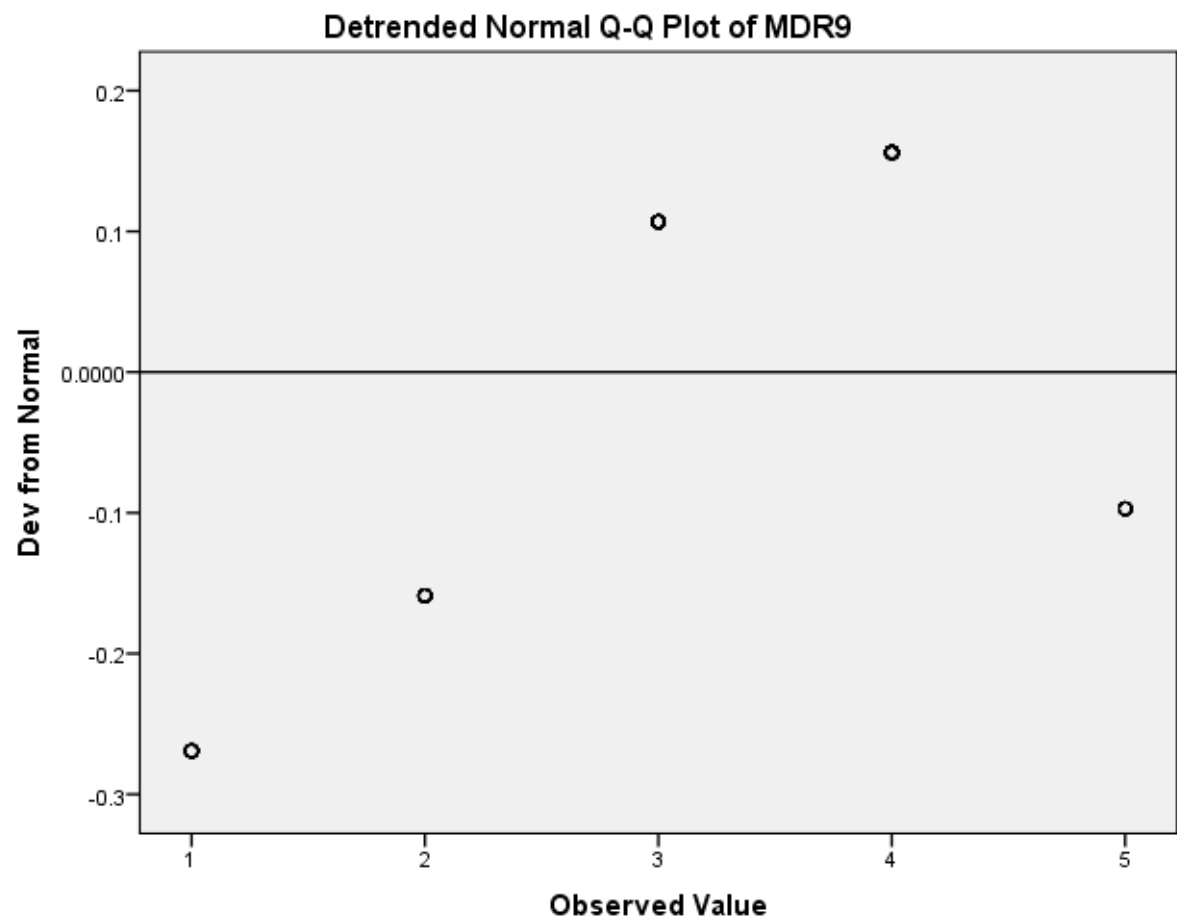

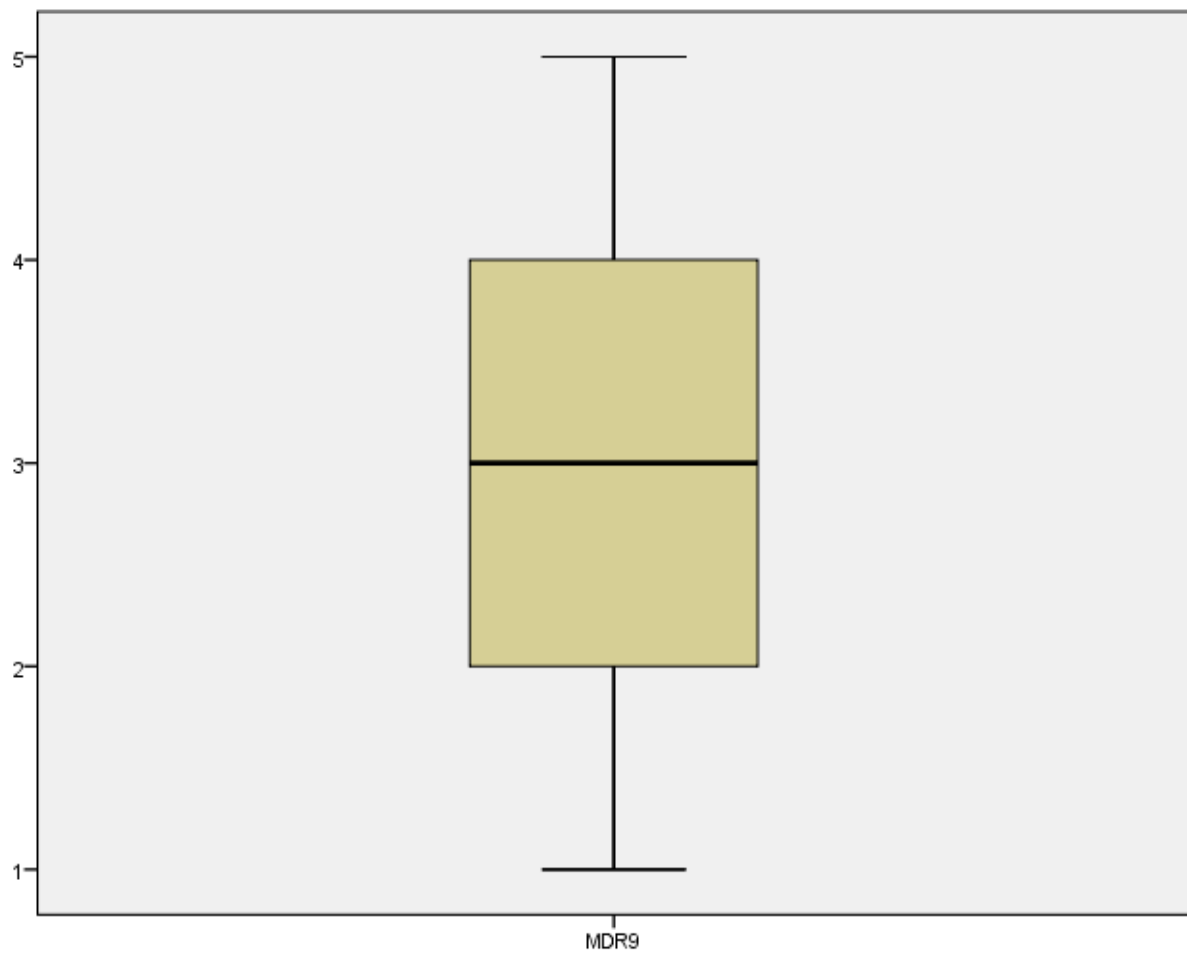

## MDR11

MDR11 Stem-and-Leaf Plot

| Frequency | Stem &   | Leaf                                                             |
|-----------|----------|------------------------------------------------------------------|
| 34.00     | 1 .      | 00000000000000000000000000000000                                 |
| .00       | 1 .      |                                                                  |
| .00       | 1 .      |                                                                  |
| .00       | 1 .      |                                                                  |
| .00       | 1 .      |                                                                  |
| 49.00     | 2 .      | 0000000000000000000000000000000000000000000000000000000000000000 |
| .00       | 2 .      |                                                                  |
| .00       | 2 .      |                                                                  |
| .00       | 2 .      |                                                                  |
| .00       | 2 .      |                                                                  |
| 11.00     | 3 .      | 000000000000                                                     |
| 11.00     | Extremes | (>=4.0)                                                          |

```
Stem width:      1.0
Each leaf:       1 case(s)
```

Normal Q-Q Plot of MDR11

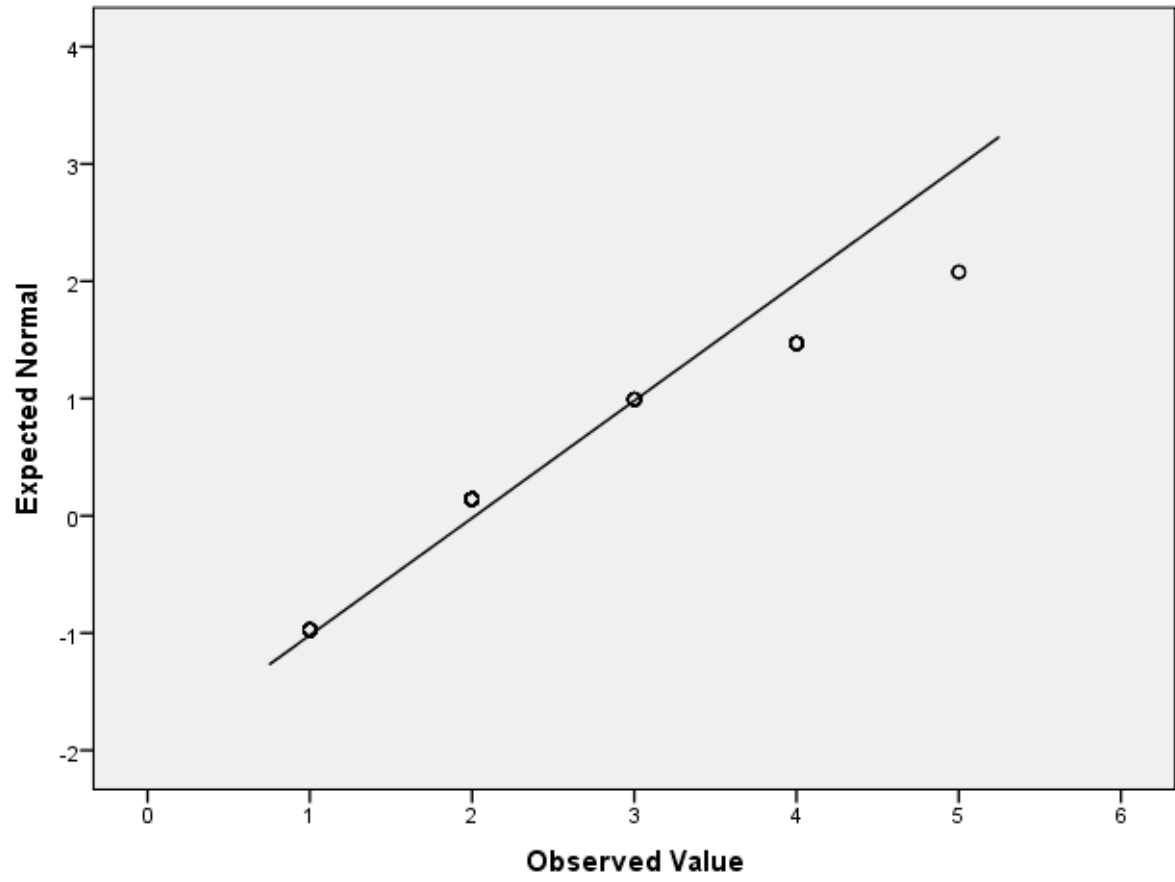

Detrended Normal Q-Q Plot of MDR11

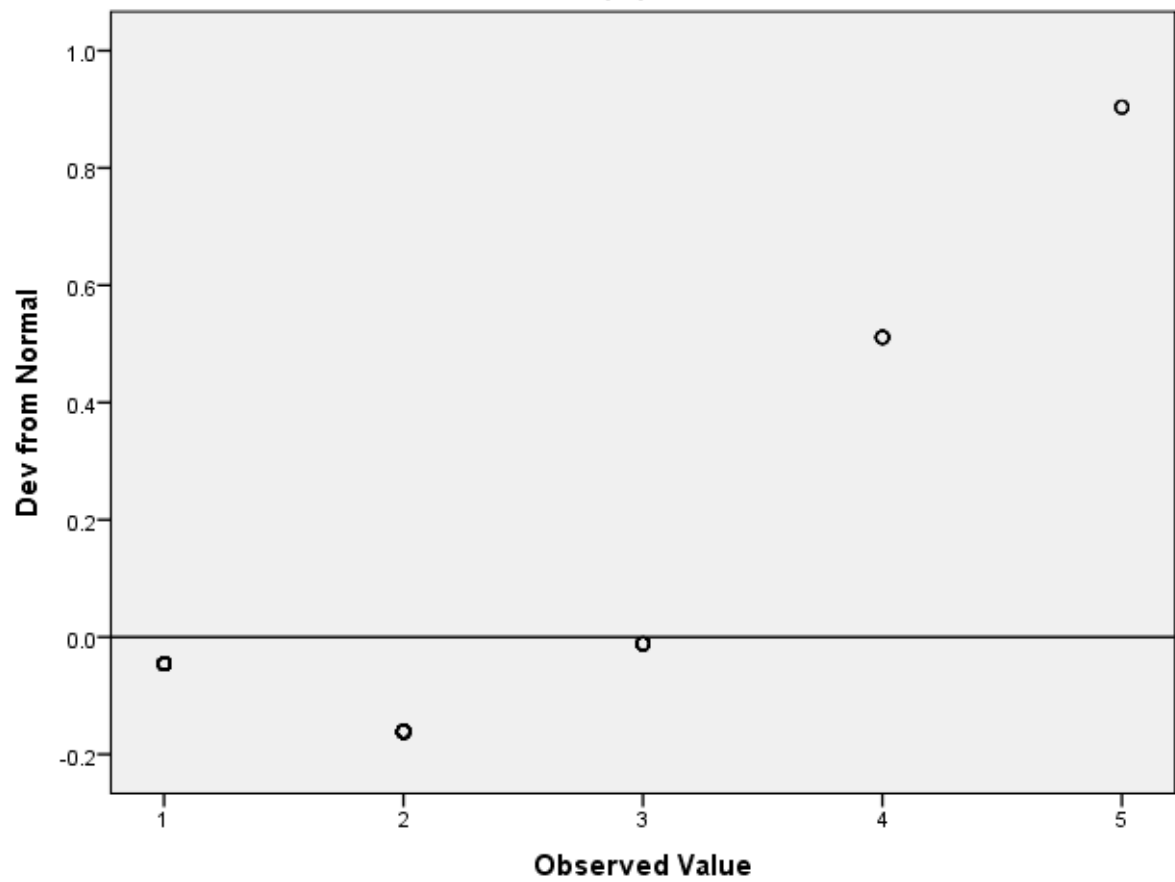

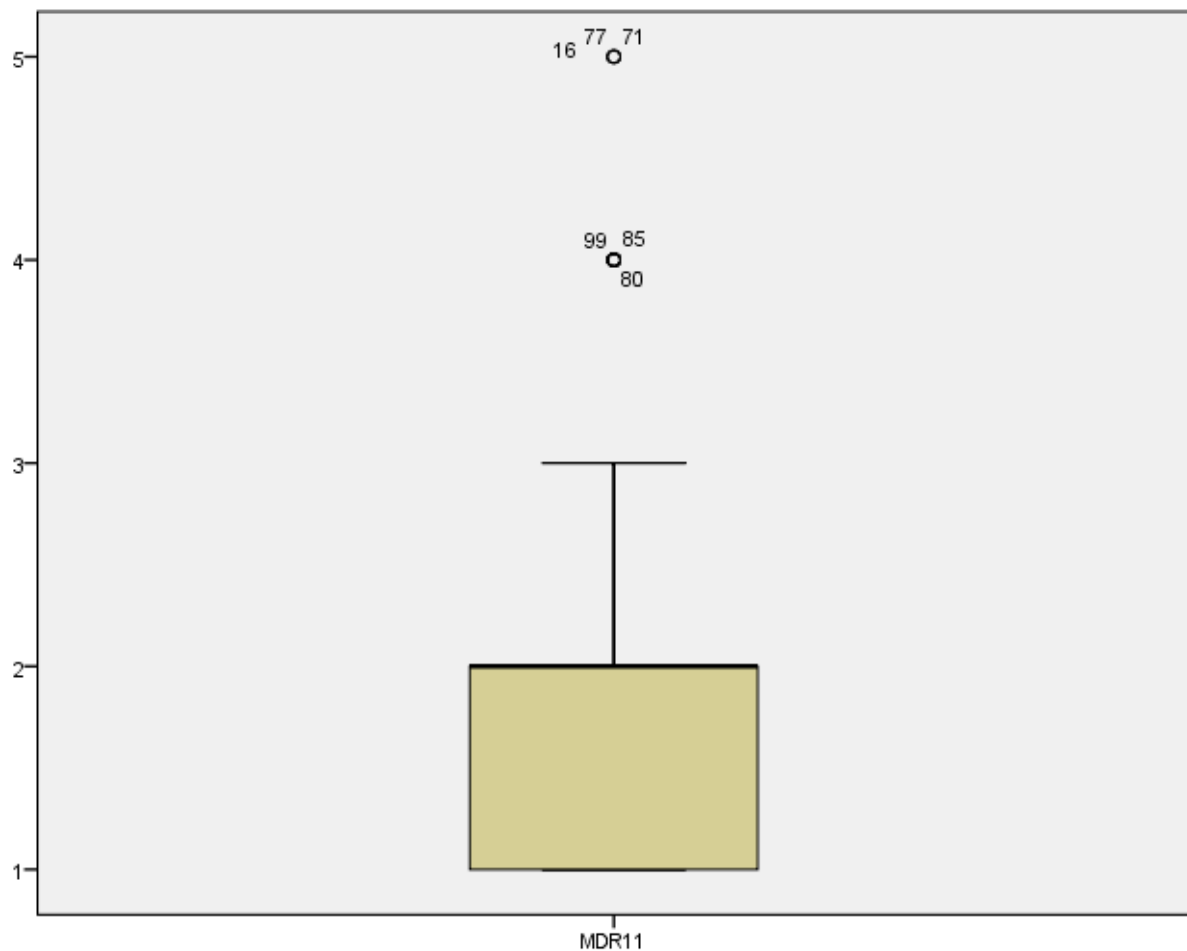

```

EXAMINE VARIABLES=MDR1 MDR2 MDR3 MDR4 MDR5 MDR6 MDR7 MDR8 MDR9 MDR11
/PLOT BOXPLOT STEMLEAF HISTOGRAM NPLOT
/COMPARE GROUPS
/STATISTICS EXTREME
/MISSING REPORT
/NOTOTAL.

```

## Explore

| Notes          |                |                                                                      |
|----------------|----------------|----------------------------------------------------------------------|
| Output Created |                | 15-SEP-2022 14:17:38                                                 |
| Comments       |                |                                                                      |
| Input          | Data           | C:\DBA\research paper,\German med paper\statistics\110 spss data.sav |
|                | Active Dataset | DataSet1                                                             |
|                | Filter         | <none>                                                               |

|                        |                                |                                                                                                                                                           |             |
|------------------------|--------------------------------|-----------------------------------------------------------------------------------------------------------------------------------------------------------|-------------|
|                        | Weight                         | <none>                                                                                                                                                    |             |
|                        | Split File                     | <none>                                                                                                                                                    |             |
|                        | N of Rows in Working Data File |                                                                                                                                                           | 110         |
|                        | Definition of Missing          | User-defined missing values for dependent variables are treated as missing. User-defined and system missing values for factors are treated as valid data. |             |
| Missing Value Handling | Cases Used                     | Statistics are based on cases with no missing values for any dependent variable or factor used.                                                           |             |
| Syntax                 |                                | EXAMINE VARIABLES=MDR1 MDR2 MDR3 MDR4 MDR5 MDR6 MDR7 MDR8 MDR9 MDR11                                                                                      |             |
|                        |                                | /PLOT BOXPLOT STEMLEAF                                                                                                                                    |             |
|                        |                                | HISTOGRAM NPLOT                                                                                                                                           |             |
|                        |                                | /COMPARE GROUPS                                                                                                                                           |             |
| Resources              |                                | /STATISTICS EXTREME                                                                                                                                       |             |
|                        |                                | /MISSING REPORT                                                                                                                                           |             |
|                        |                                | /NOTOTAL.                                                                                                                                                 |             |
|                        | Processor Time                 |                                                                                                                                                           | 00:00:03.28 |
|                        | Elapsed Time                   |                                                                                                                                                           | 00:00:03.28 |

[DataSet1] C:\DBA\research paper,\German med paper\statistics\110 spss data.sav

**Case Processing Summary**

|      | Cases |         |         |         |       |         |
|------|-------|---------|---------|---------|-------|---------|
|      | Valid |         | Missing |         | Total |         |
|      | N     | Percent | N       | Percent | N     | Percent |
| MDR1 | 110   | 100.0%  | 0       | 0.0%    | 110   | 100.0%  |
| MDR2 | 110   | 100.0%  | 0       | 0.0%    | 110   | 100.0%  |
| MDR3 | 110   | 100.0%  | 0       | 0.0%    | 110   | 100.0%  |
| MDR4 | 110   | 100.0%  | 0       | 0.0%    | 110   | 100.0%  |
| MDR5 | 110   | 100.0%  | 0       | 0.0%    | 110   | 100.0%  |
| MDR6 | 110   | 100.0%  | 0       | 0.0%    | 110   | 100.0%  |
| MDR7 | 110   | 100.0%  | 0       | 0.0%    | 110   | 100.0%  |
| MDR8 | 110   | 100.0%  | 0       | 0.0%    | 110   | 100.0%  |
| MDR9 | 110   | 100.0%  | 0       | 0.0%    | 110   | 100.0%  |

|       |     |        |   |      |     |        |
|-------|-----|--------|---|------|-----|--------|
| MDR11 | 110 | 100.0% | 0 | 0.0% | 110 | 100.0% |
|-------|-----|--------|---|------|-----|--------|

### Extreme Values

|      |         |   | Case Number | Value            |
|------|---------|---|-------------|------------------|
| MDR1 | Highest | 1 | 2           | 5.0              |
|      |         | 2 | 5           | 5.0              |
|      |         | 3 | 6           | 5.0              |
|      |         | 4 | 7           | 5.0              |
|      |         | 5 | 8           | 5.0 <sup>a</sup> |
|      | Lowest  | 1 | 99          | 1.0              |
|      |         | 2 | 77          | 1.0              |
|      |         | 3 | 76          | 1.0              |
|      |         | 4 | 90          | 2.0              |
|      |         | 5 | 85          | 2.0 <sup>b</sup> |
| MDR2 | Highest | 1 | 76          | 5.0              |
|      |         | 2 | 21          | 4.0              |
|      |         | 3 | 27          | 4.0              |
|      |         | 4 | 51          | 4.0              |
|      |         | 5 | 90          | 4.0 <sup>c</sup> |
|      | Lowest  | 1 | 110         | 1.0              |
|      |         | 2 | 92          | 1.0              |
|      |         | 3 | 77          | 1.0              |
|      |         | 4 | 71          | 1.0              |
|      |         | 5 | 64          | 1.0 <sup>d</sup> |
| MDR3 | Highest | 1 | 7           | 5.0              |
|      |         | 2 | 9           | 4.0              |
|      |         | 3 | 13          | 4.0              |
|      |         | 4 | 15          | 4.0              |
|      |         | 5 | 50          | 4.0 <sup>e</sup> |
|      | Lowest  | 1 | 103         | 1.0              |
|      |         | 2 | 99          | 1.0              |
|      |         | 3 | 77          | 1.0              |
|      |         | 4 | 76          | 1.0              |
|      |         | 5 | 72          | 1.0 <sup>d</sup> |
| MDR4 | Highest | 1 | 76          | 5.0              |
|      |         | 2 | 21          | 4.0              |
|      |         | 3 | 43          | 3.0              |
|      |         | 4 | 56          | 3.0              |
|      | Lowest  | 5 | 63          | 3.0 <sup>e</sup> |
|      |         | 1 | 104         | 1.0              |

|      |         |   |     |                  |
|------|---------|---|-----|------------------|
|      |         | 2 | 102 | 1.0              |
|      |         | 3 | 94  | 1.0              |
|      |         | 4 | 93  | 1.0              |
|      |         | 5 | 82  | 1.0 <sup>d</sup> |
|      |         | 1 | 8   | 5.0              |
|      |         | 2 | 71  | 5.0              |
|      | Highest | 3 | 2   | 4.0              |
|      |         | 4 | 7   | 4.0              |
| MDR5 |         | 5 | 15  | 4.0 <sup>c</sup> |
|      |         | 1 | 103 | 1.0              |
|      |         | 2 | 99  | 1.0              |
|      | Lowest  | 3 | 82  | 1.0              |
|      |         | 4 | 77  | 1.0              |
|      |         | 5 | 76  | 1.0 <sup>d</sup> |
|      |         | 1 | 21  | 5.0              |
|      |         | 2 | 76  | 5.0              |
|      | Highest | 3 | 77  | 5.0              |
|      |         | 4 | 5   | 4.0              |
| MDR6 |         | 5 | 27  | 4.0 <sup>c</sup> |
|      |         | 1 | 110 | 1.0              |
|      |         | 2 | 103 | 1.0              |
|      | Lowest  | 3 | 80  | 1.0              |
|      |         | 4 | 72  | 1.0              |
|      |         | 5 | 62  | 1.0 <sup>d</sup> |
|      |         | 1 | 76  | 5.0              |
|      |         | 2 | 77  | 5.0              |
|      | Highest | 3 | 85  | 4.0              |
|      |         | 4 | 90  | 4.0              |
| MDR7 |         | 5 | 99  | 4.0              |
|      |         | 1 | 110 | 1.0              |
|      |         | 2 | 101 | 1.0              |
|      | Lowest  | 3 | 94  | 1.0              |
|      |         | 4 | 92  | 1.0              |
|      |         | 5 | 88  | 1.0 <sup>d</sup> |
|      |         | 1 | 77  | 5.0              |
|      |         | 2 | 76  | 4.0              |
|      | Highest | 3 | 21  | 3.0              |
|      |         | 4 | 32  | 3.0              |
| MDR8 |         | 5 | 38  | 3.0 <sup>e</sup> |
|      |         | 1 | 99  | 1.0              |
|      | Lowest  | 2 | 79  | 1.0              |
|      |         | 3 | 75  | 1.0              |
|      |         | 4 | 72  | 1.0              |



|       |         |   |     |                  |
|-------|---------|---|-----|------------------|
| MDR9  | Highest | 5 | 61  | 1.0 <sup>d</sup> |
|       |         | 1 | 16  | 5.0              |
|       |         | 2 | 17  | 5.0              |
|       |         | 3 | 18  | 5.0              |
|       |         | 4 | 42  | 5.0              |
|       | Lowest  | 5 | 68  | 5.0 <sup>a</sup> |
|       |         | 1 | 99  | 1.0              |
|       |         | 2 | 90  | 1.0              |
|       |         | 3 | 89  | 1.0              |
|       |         | 4 | 85  | 1.0              |
| MDR11 | Highest | 5 | 78  | 1.0 <sup>d</sup> |
|       |         | 1 | 16  | 5.0              |
|       |         | 2 | 71  | 5.0              |
|       |         | 3 | 77  | 5.0              |
|       |         | 4 | 2   | 4.0              |
|       | Lowest  | 5 | 21  | 4.0 <sup>c</sup> |
|       |         | 1 | 110 | 1.0              |
|       |         | 2 | 96  | 1.0              |
|       |         | 3 | 87  | 1.0              |
|       |         | 4 | 83  | 1.0              |
|       |         | 5 | 76  | 1.0 <sup>d</sup> |

- a. Only a partial list of cases with the value 5.0 are shown in the table of upper extremes.
- b. Only a partial list of cases with the value 2.0 are shown in the table of lower extremes.
- c. Only a partial list of cases with the value 4.0 are shown in the table of upper extremes.
- d. Only a partial list of cases with the value 1.0 are shown in the table of lower extremes.
- e. Only a partial list of cases with the value 3.0 are shown in the table of upper extremes.

#### Tests of Normality

|      | Kolmogorov-Smirnov <sup>a</sup> |     |      | Shapiro-Wilk |     |      |
|------|---------------------------------|-----|------|--------------|-----|------|
|      | Statistic                       | df  | Sig. | Statistic    | df  | Sig. |
| MDR1 | .346                            | 110 | .000 | .731         | 110 | .000 |
| MDR2 | .393                            | 110 | .000 | .697         | 110 | .000 |
| MDR3 | .296                            | 110 | .000 | .859         | 110 | .000 |
| MDR4 | .293                            | 110 | .000 | .730         | 110 | .000 |

|       |      |     |      |      |     |      |
|-------|------|-----|------|------|-----|------|
| MDR5  | .240 | 110 | .000 | .879 | 110 | .000 |
| MDR6  | .390 | 110 | .000 | .725 | 110 | .000 |
| MDR7  | .301 | 110 | .000 | .689 | 110 | .000 |
| MDR8  | .358 | 110 | .000 | .744 | 110 | .000 |
| MDR9  | .227 | 110 | .000 | .887 | 110 | .000 |
| MDR11 | .298 | 110 | .000 | .808 | 110 | .000 |

a. Lilliefors Significance Correction

## MDR1

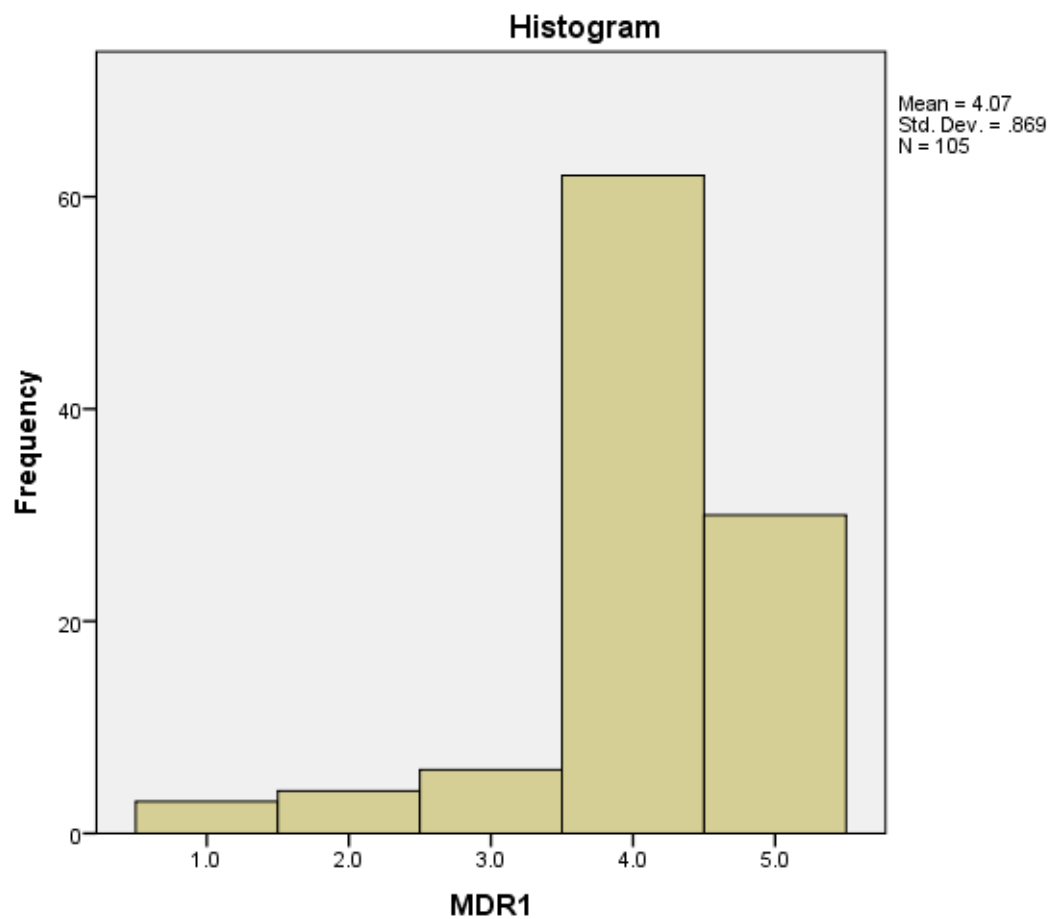

MDR1 Stem-and-Leaf Plot

|           |          |         |
|-----------|----------|---------|
| Frequency | Stem &   | Leaf    |
| 7.00      | Extremes | (=<2.0) |
| 6.00      | 3 .      | 000000  |

Normal Q-Q Plot of MDR1

The plot displays the relationship between the Observed Value (X-axis) and the Expected Normal (Y-axis). The data points are approximately (1, -2.1), (2, -1.6), (3, -1.3), (4, -0.2), and (5, 1.1). A diagonal line represents the expected normal distribution.



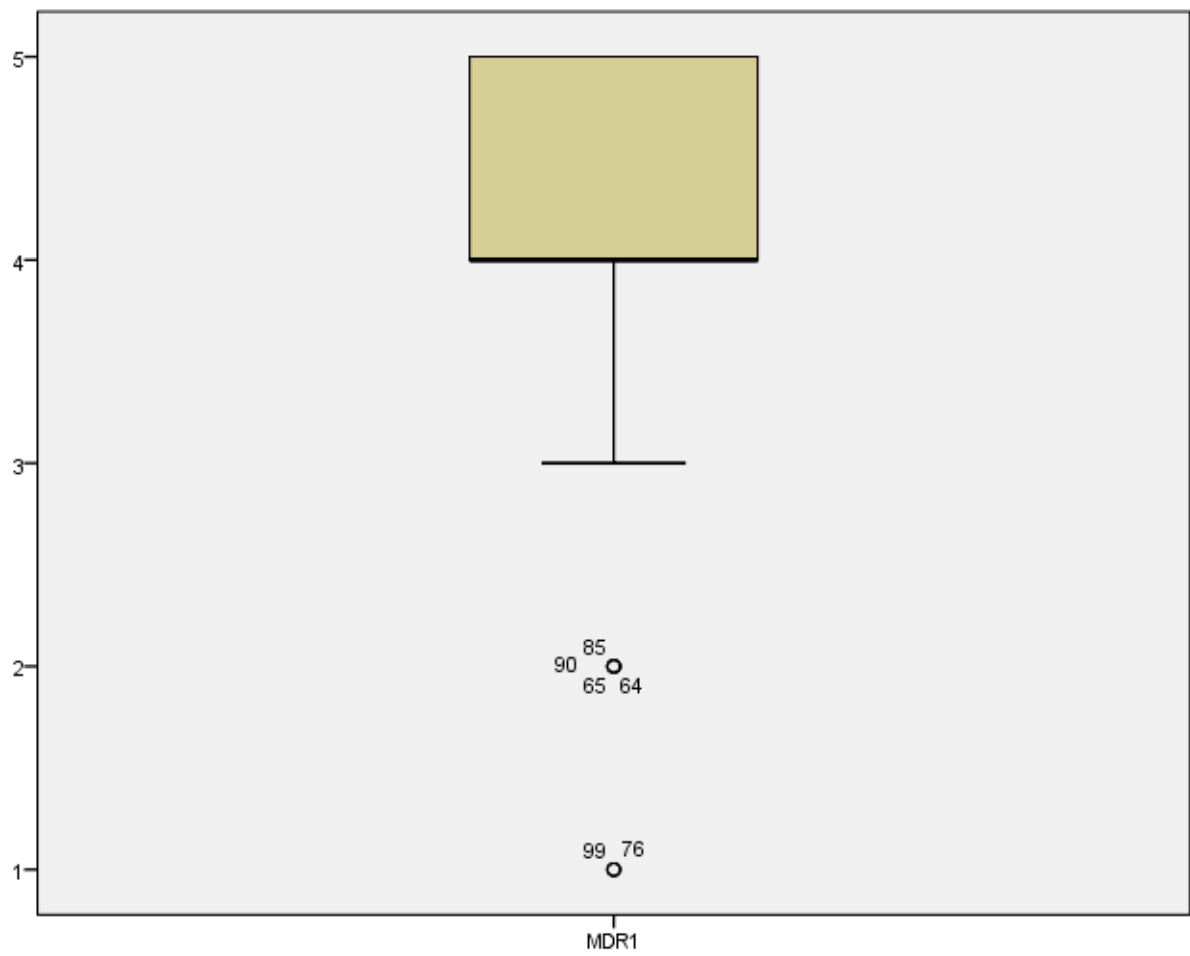

**MDR2**

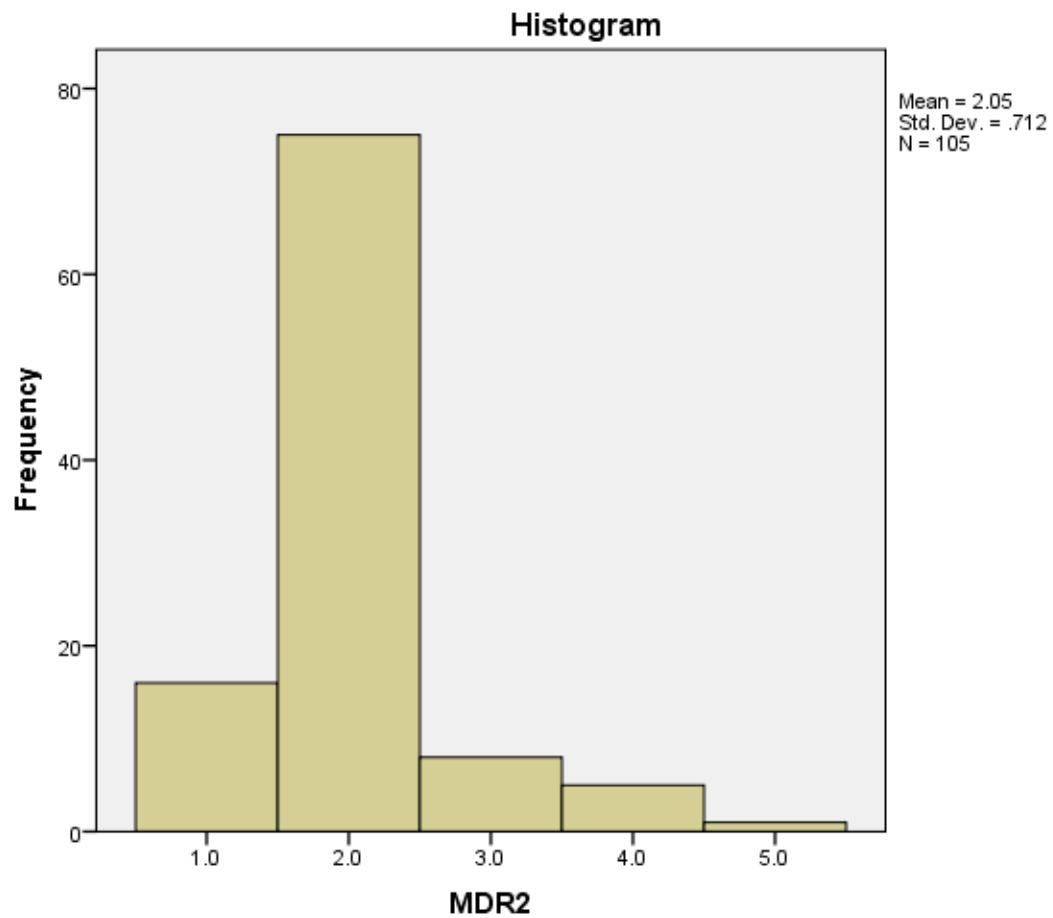

MDR2 Stem-and-Leaf Plot

[illegible]

Normal Q-Q Plot of MDR2

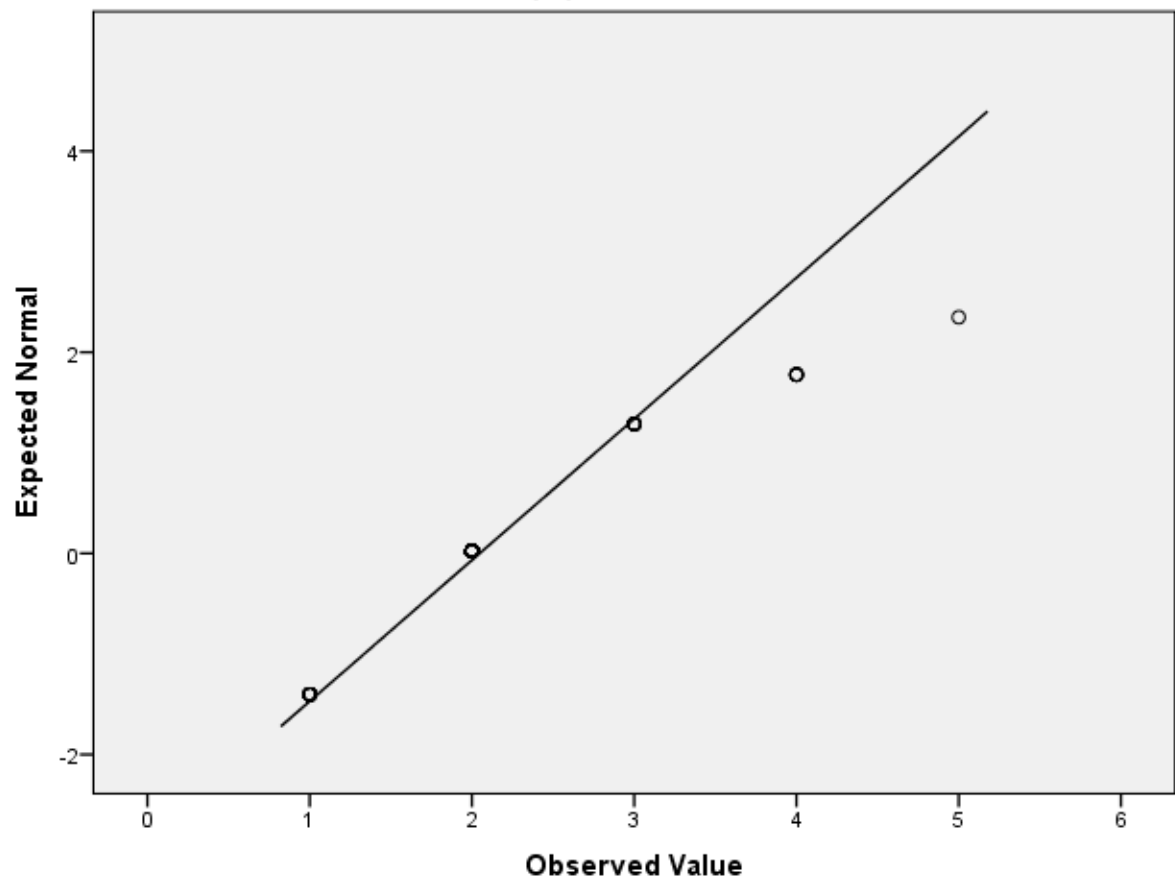

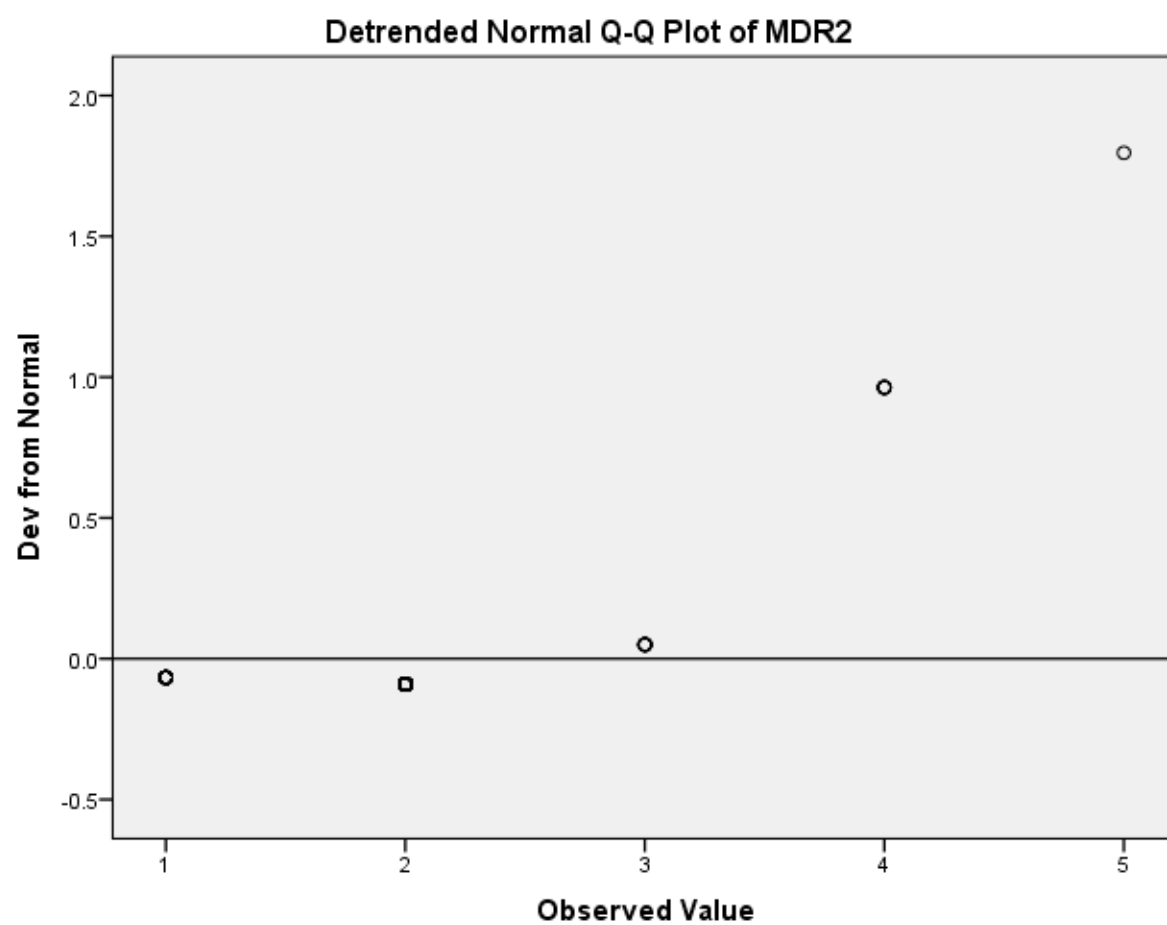



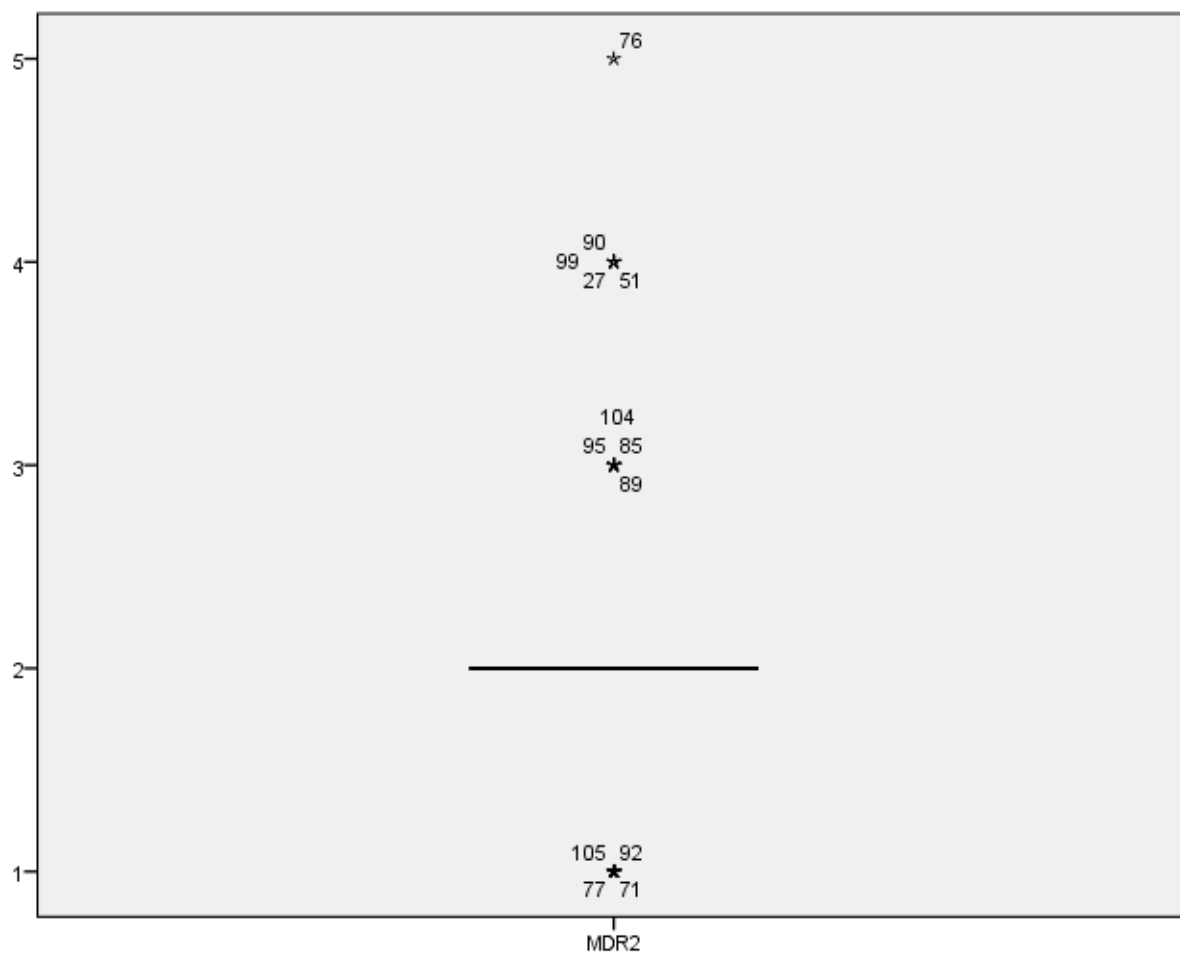

**MDR3**

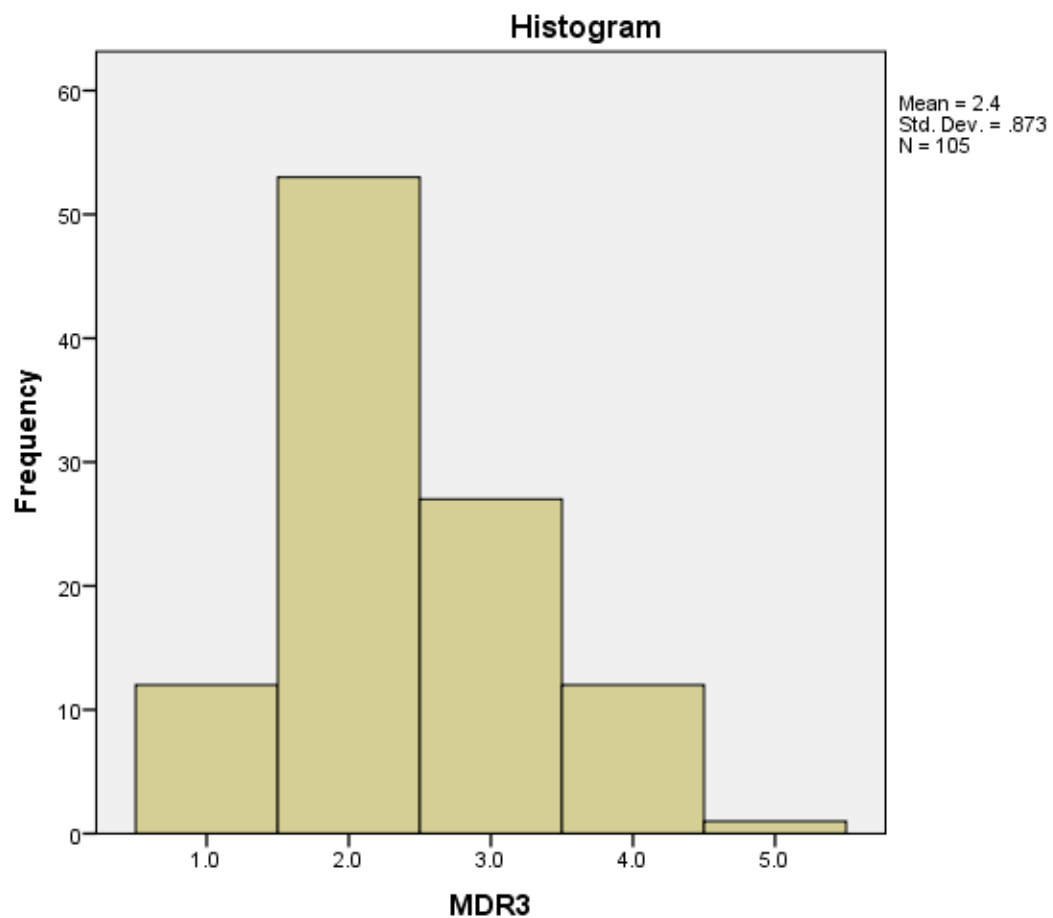

MDR3 Stem-and-Leaf Plot

[illegible]

```
Stem width:      1.0
Each leaf:      1 case(s)
```

Normal Q-Q Plot of MDR3

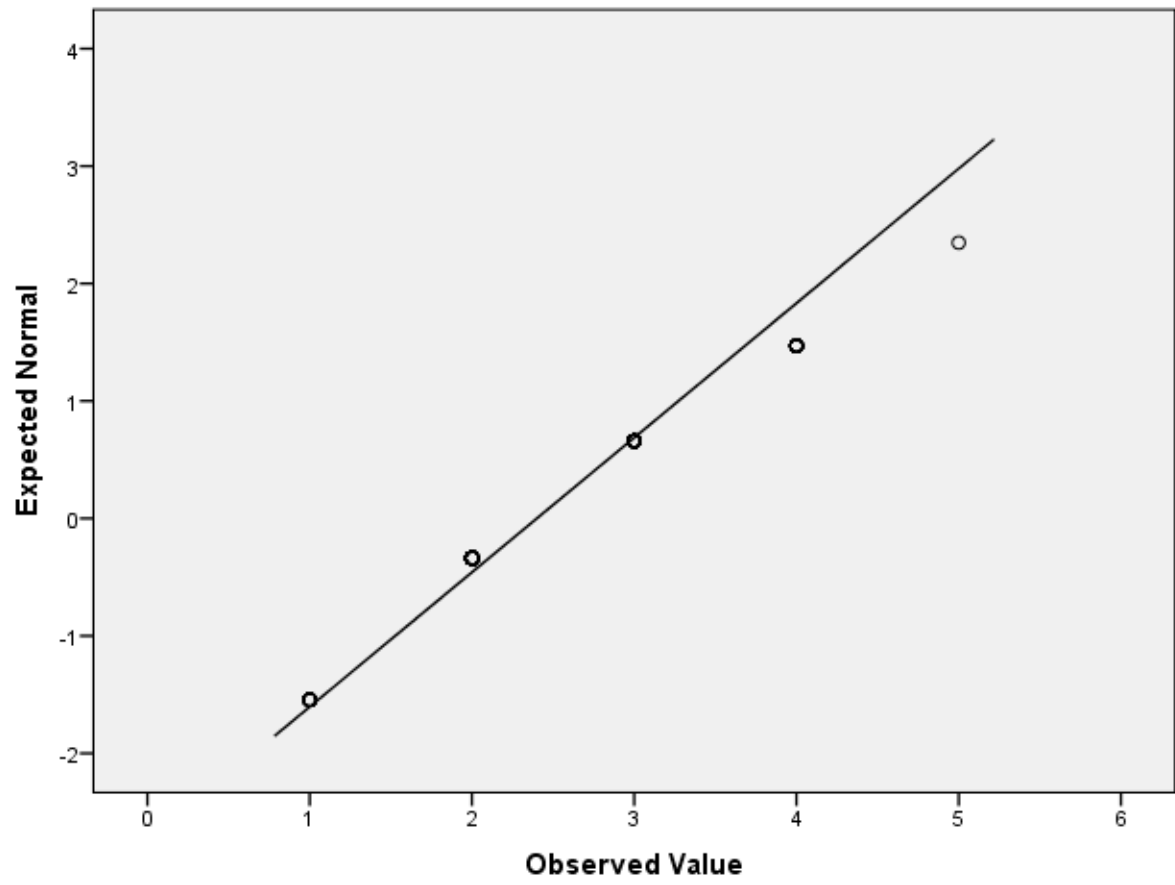

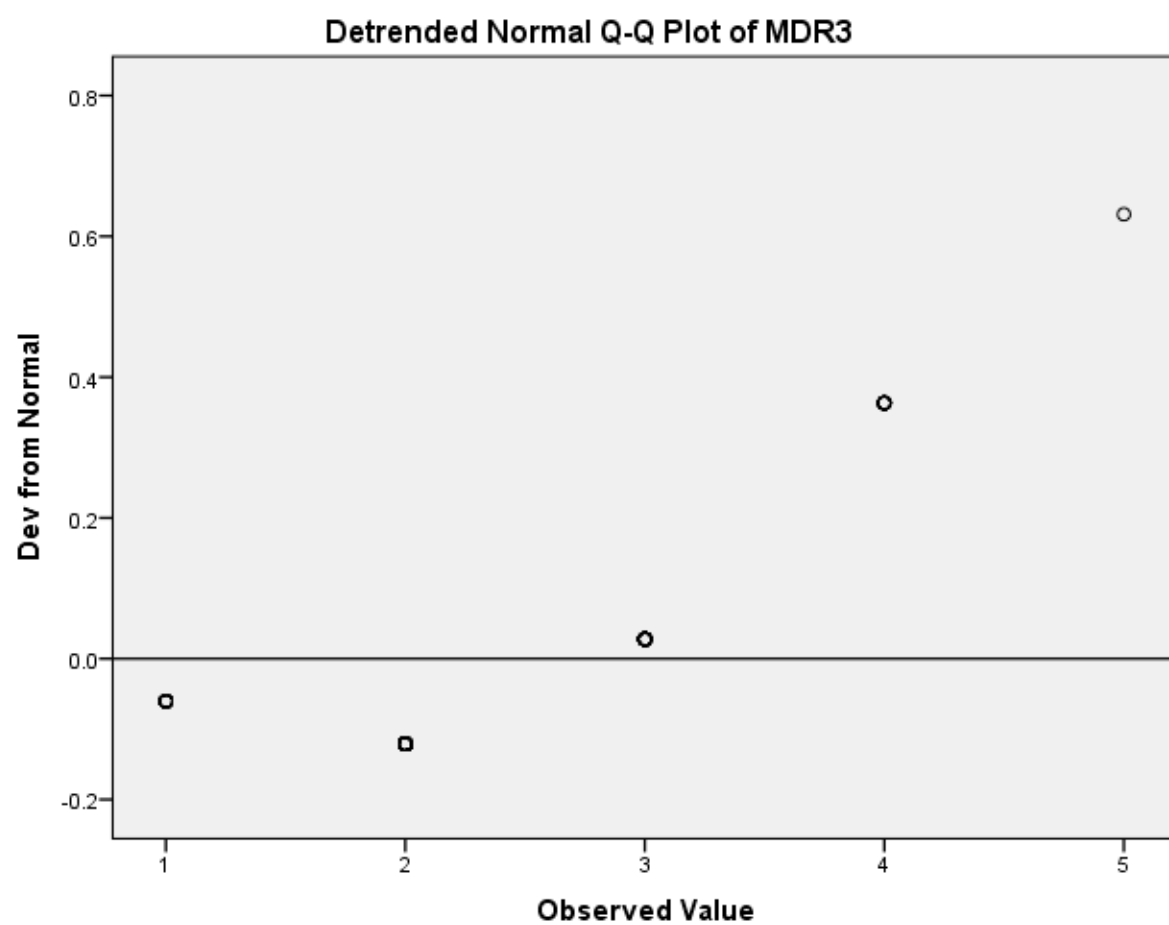

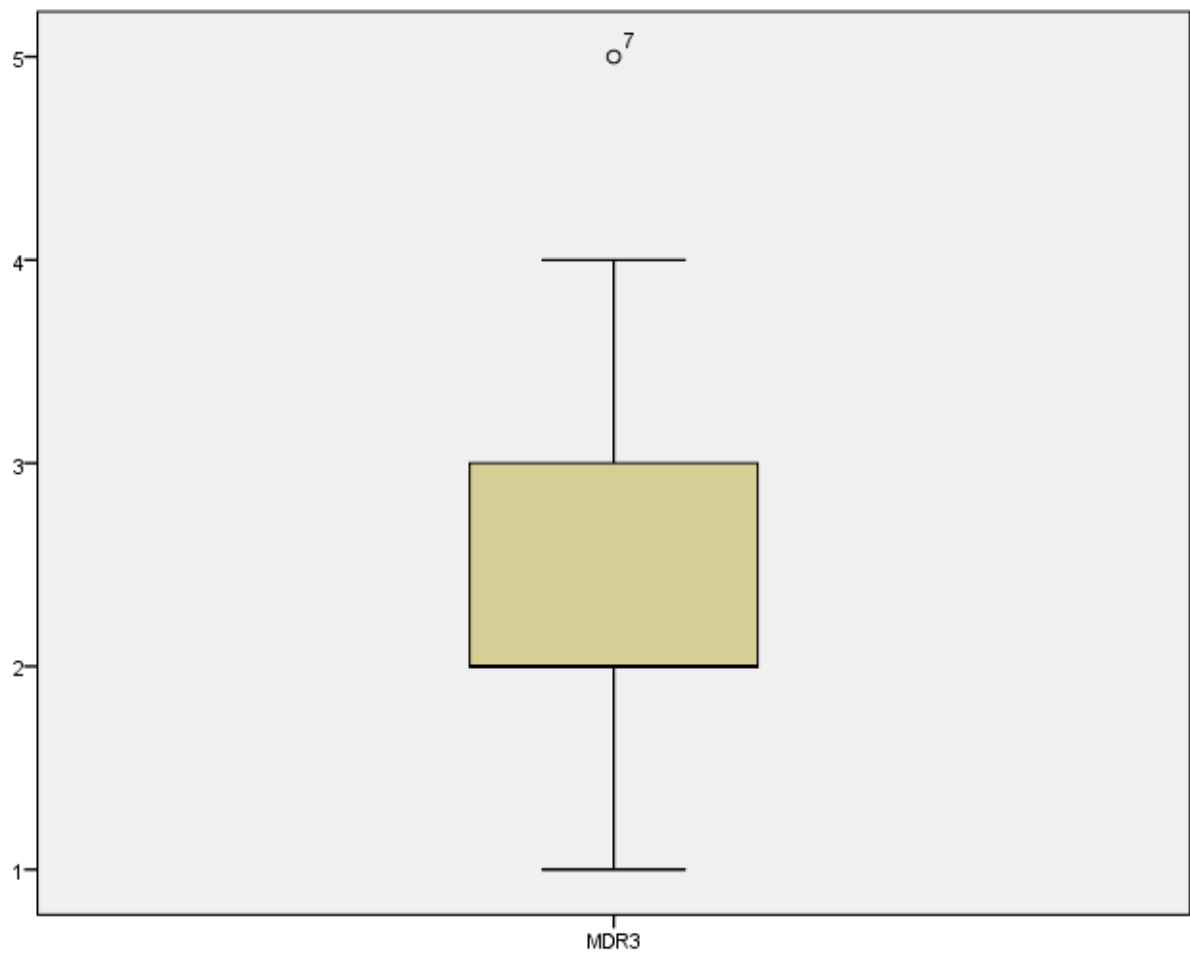

**MDR4**

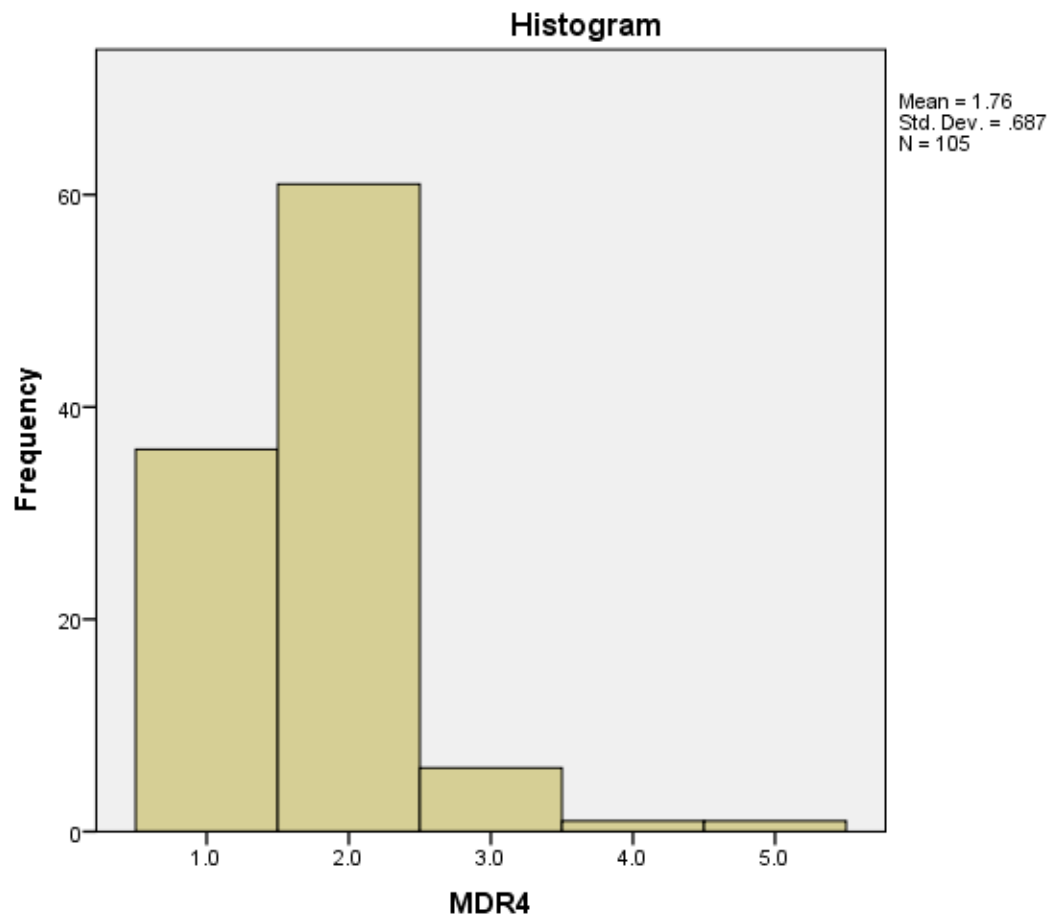

## MDR4 Stem-and-Leaf Plot

```

Frequency      Stem &  Leaf

  36.00         1 .  0000000000000000000000000000000000
   .00         1 .
   .00         1 .
   .00         1 .
   .00         1 .
  61.00         2 .
00000000000000000000000000000000000000000000000000000
   .00         2 .
   .00         2 .
   .00         2 .
   .00         2 .
   6.00         3 .  000000
   2.00 Extremes      (>=4.0)

Stem width:      1.0
Each leaf:       1 case(s)

```

Normal Q-Q Plot of MDR4

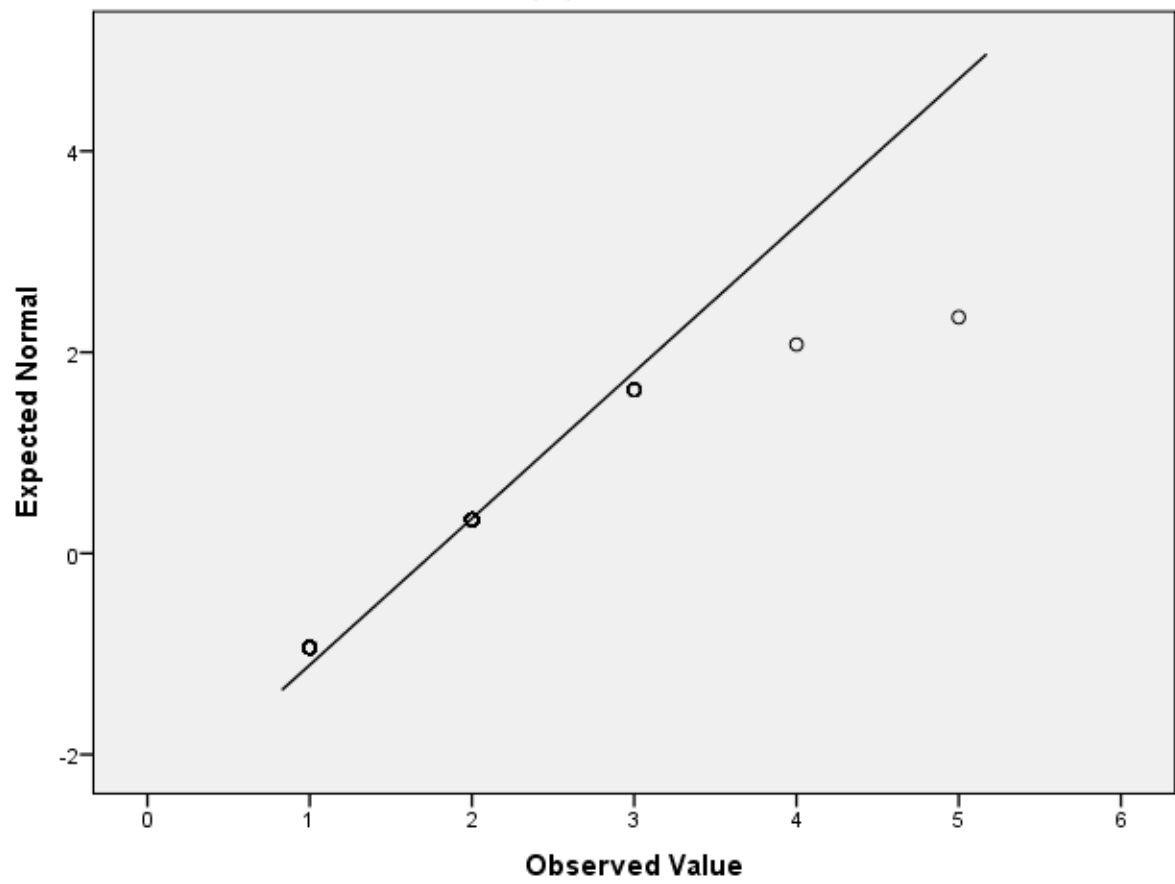

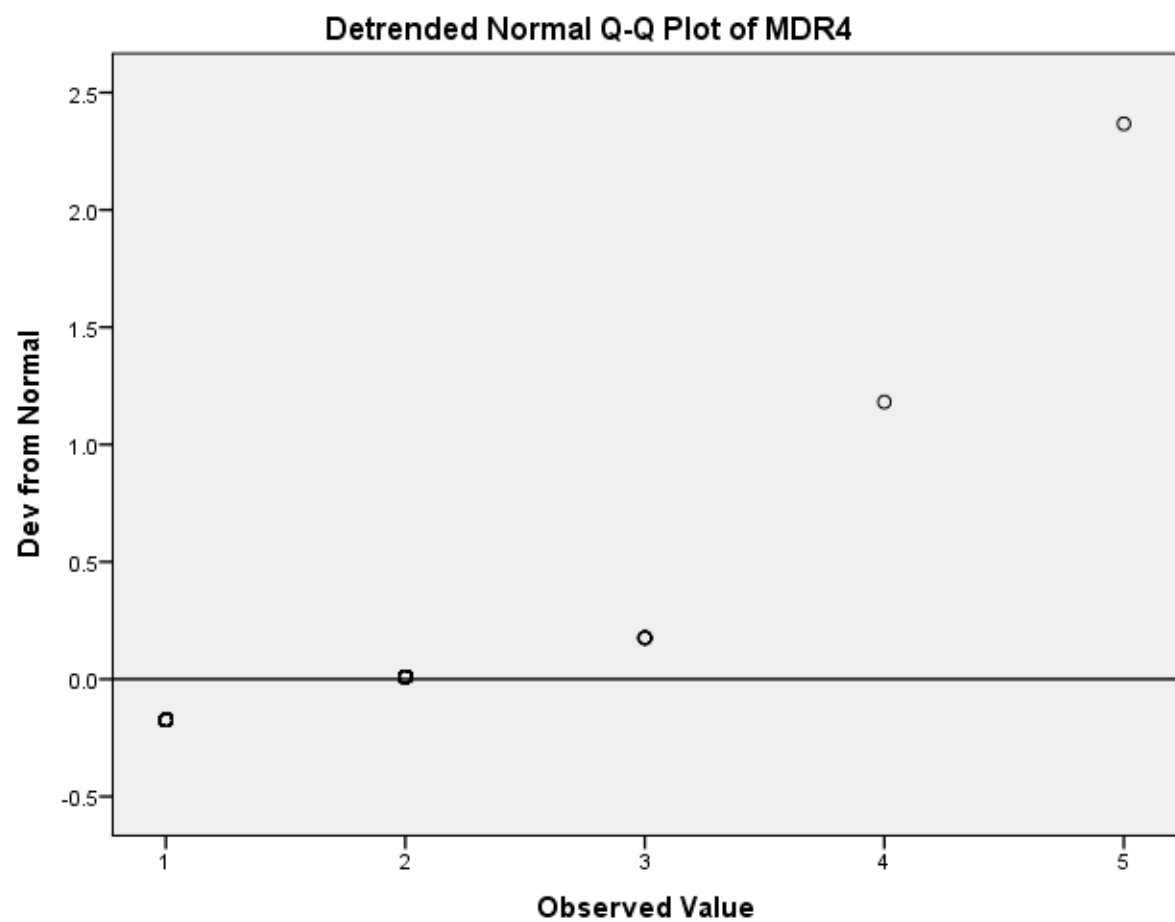



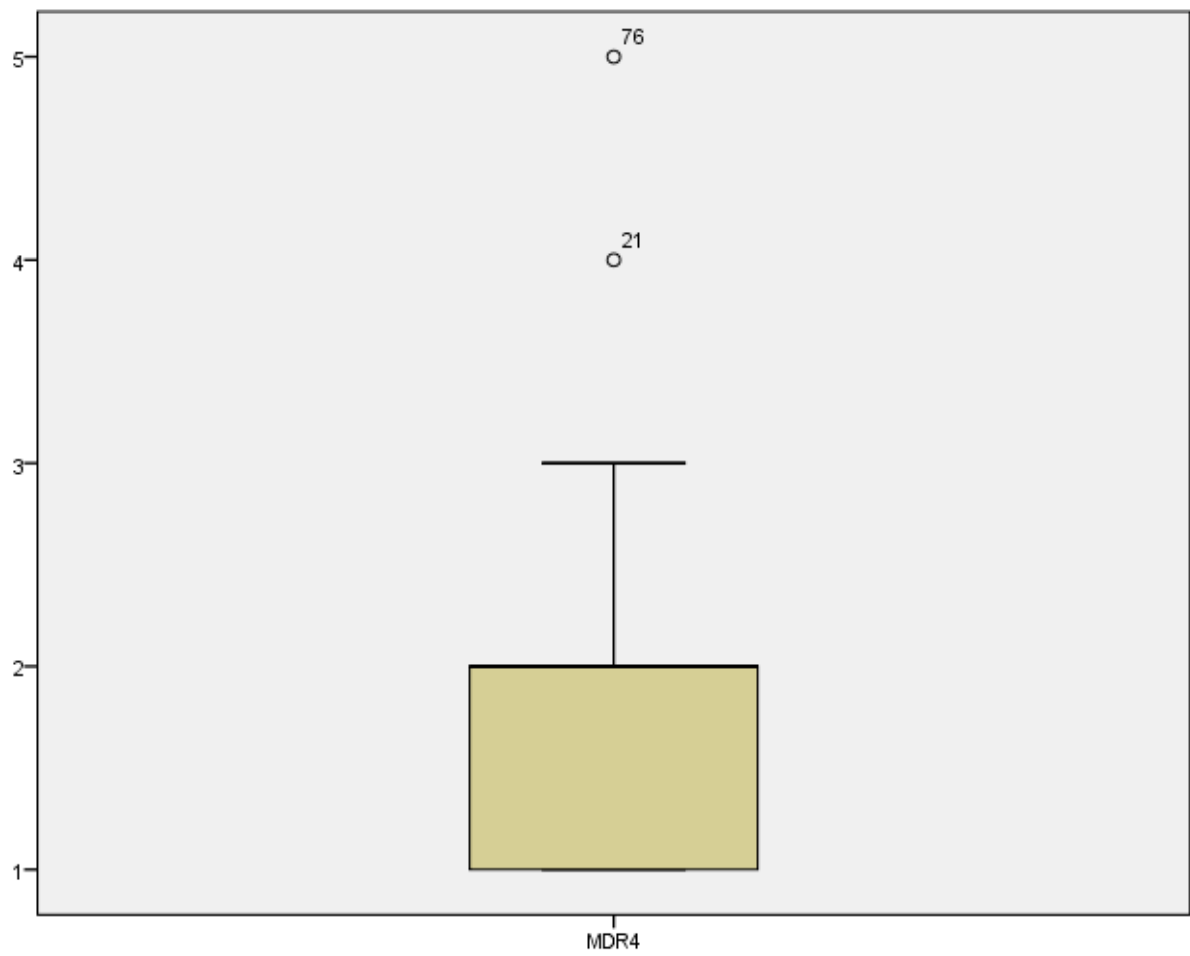

**MDR5**

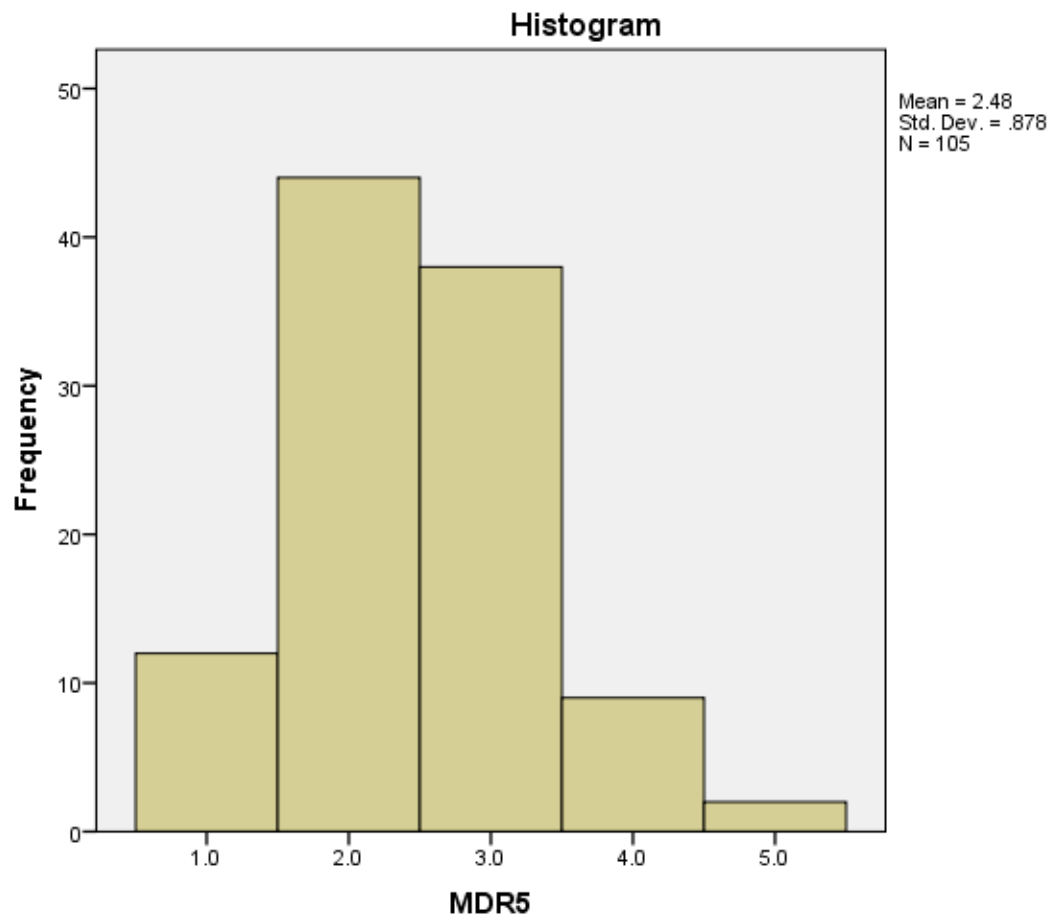

MDR5 Stem-and-Leaf Plot

[illegible]

```
Stem width:      1.0
Each leaf:      1 case(s)
```

Normal Q-Q Plot of MDR5

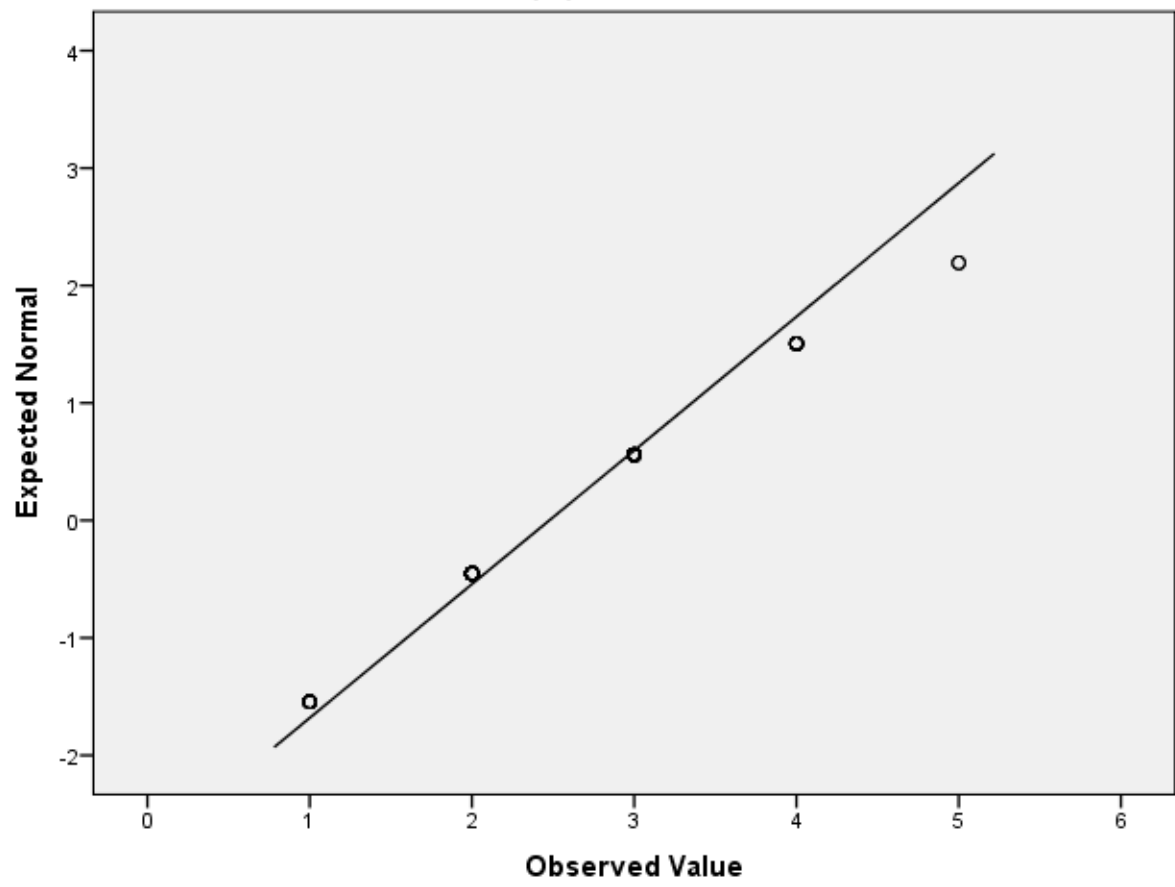

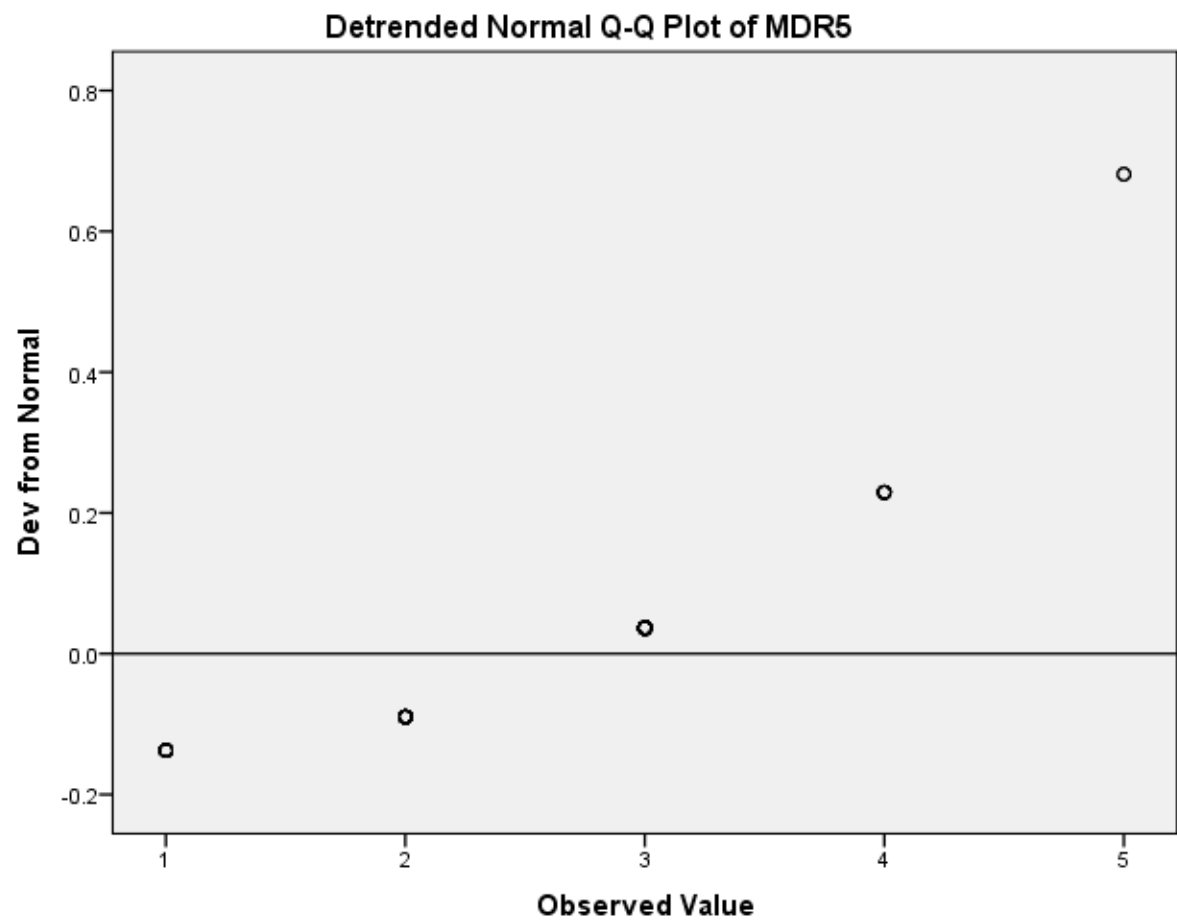

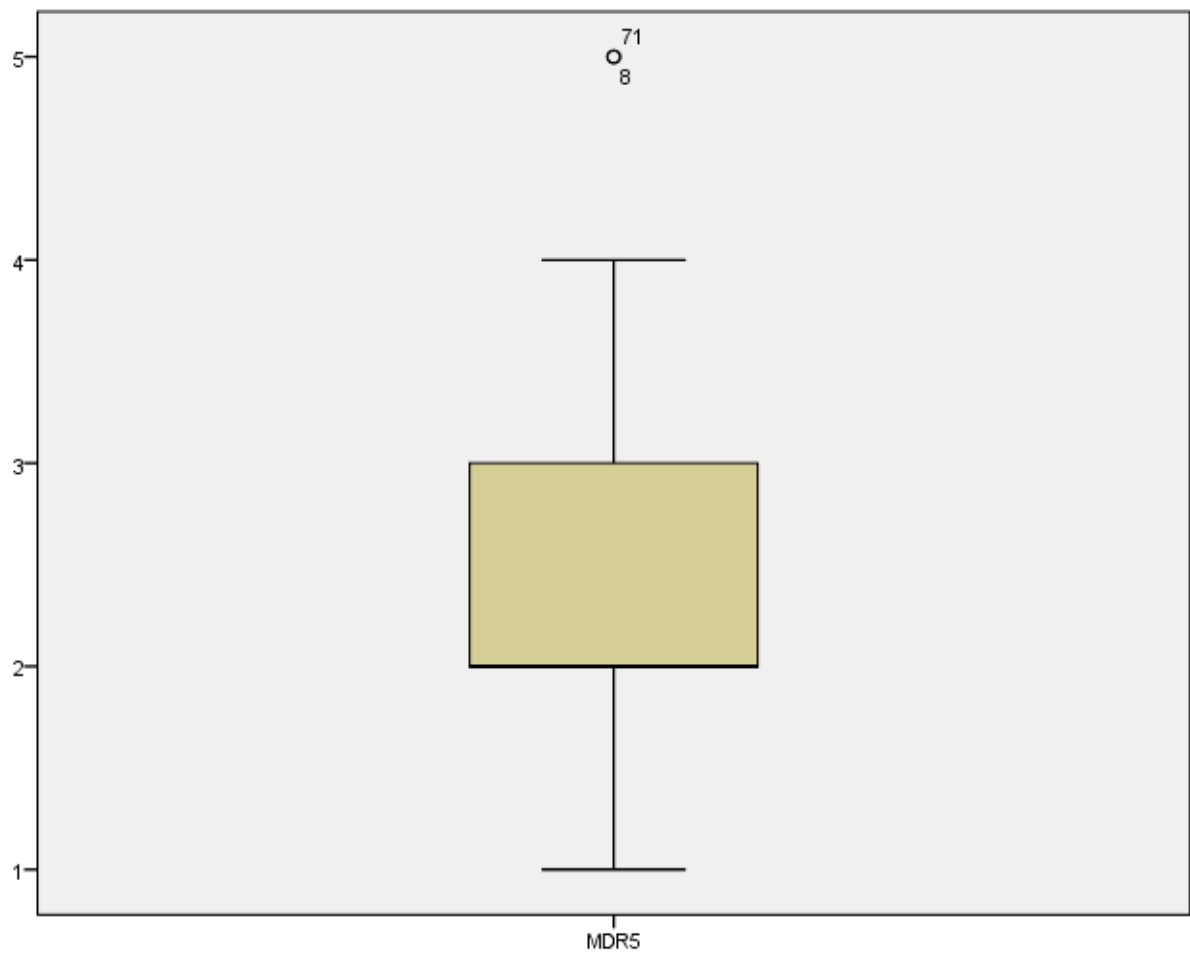

**MDR6**

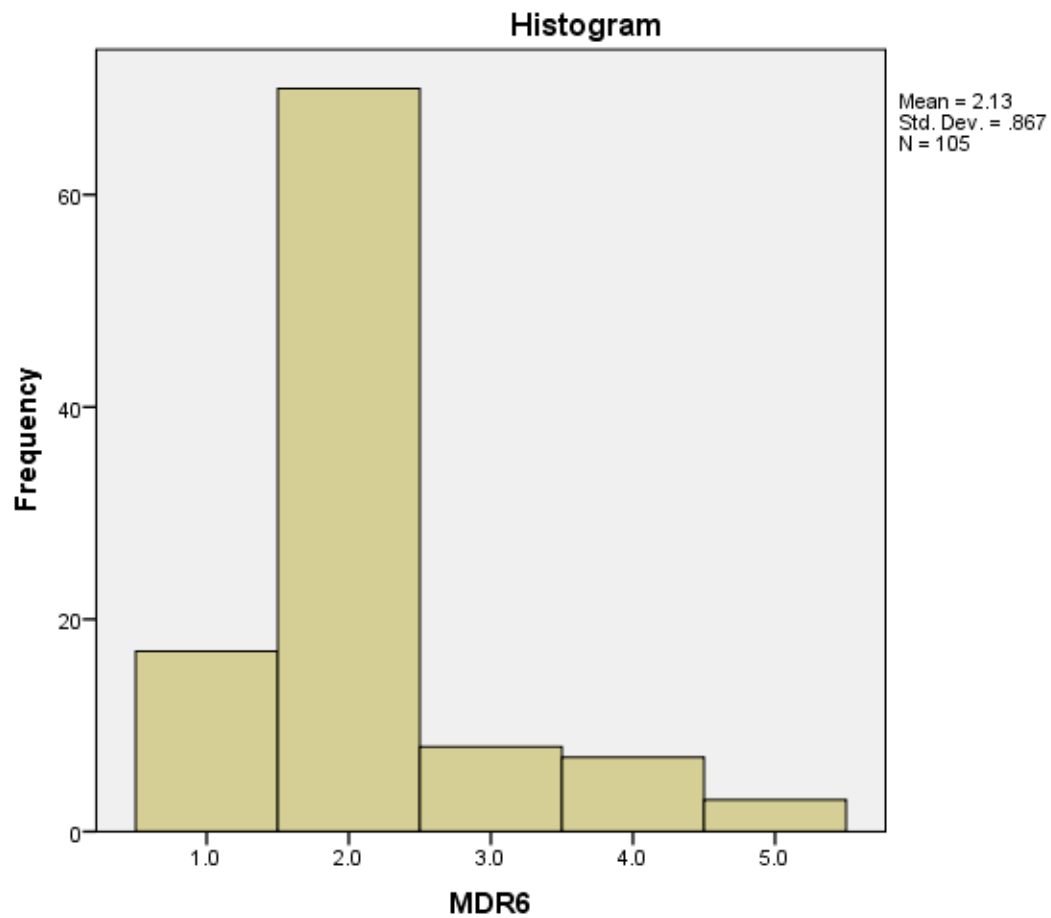

MDR6 Stem-and-Leaf Plot

[illegible]

Normal Q-Q Plot of MDR6

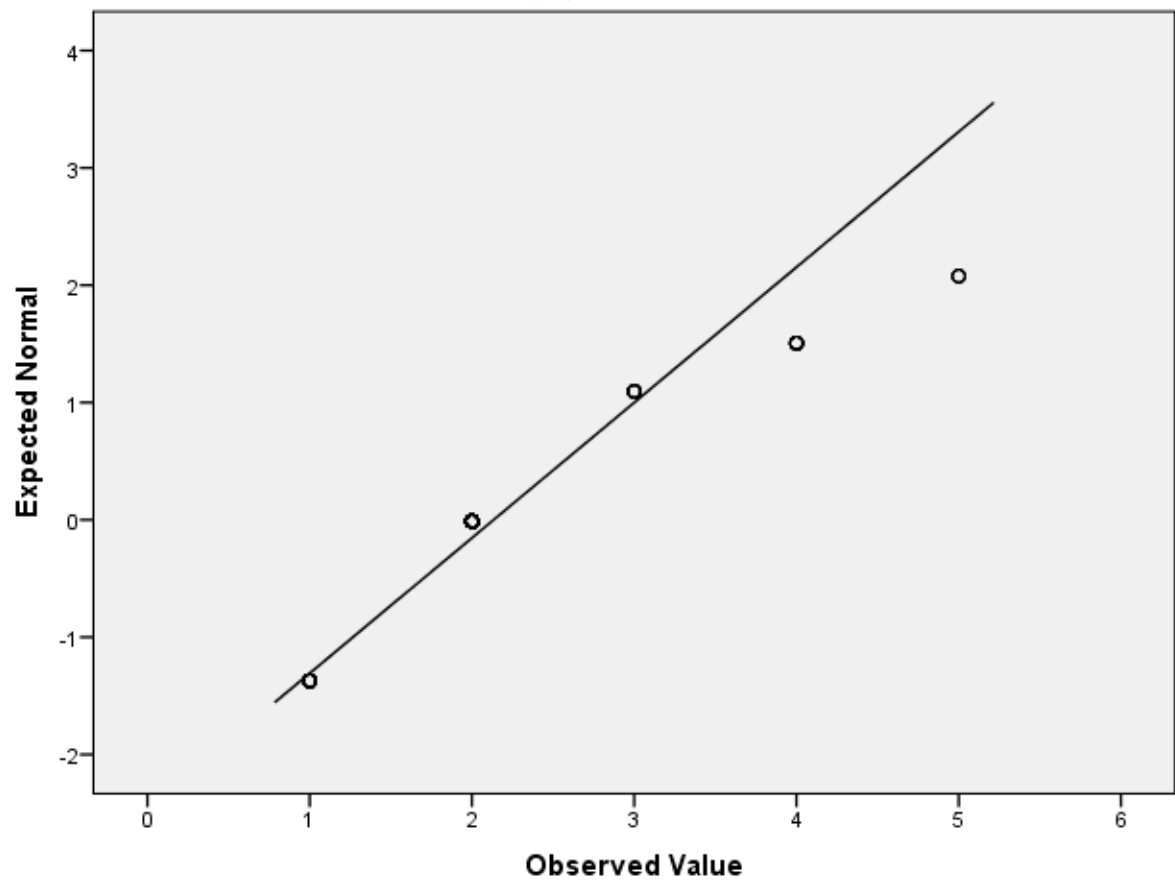

Detrended Normal Q-Q Plot of MDR6

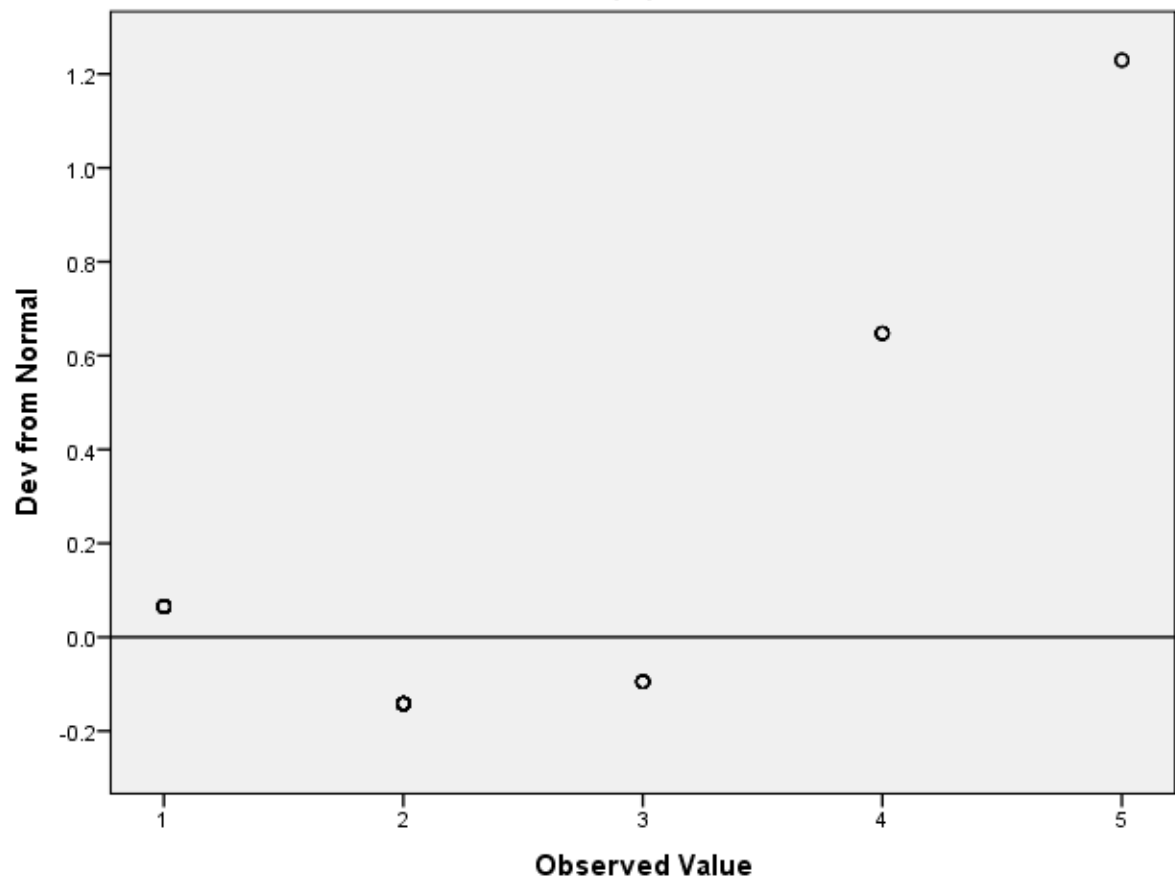



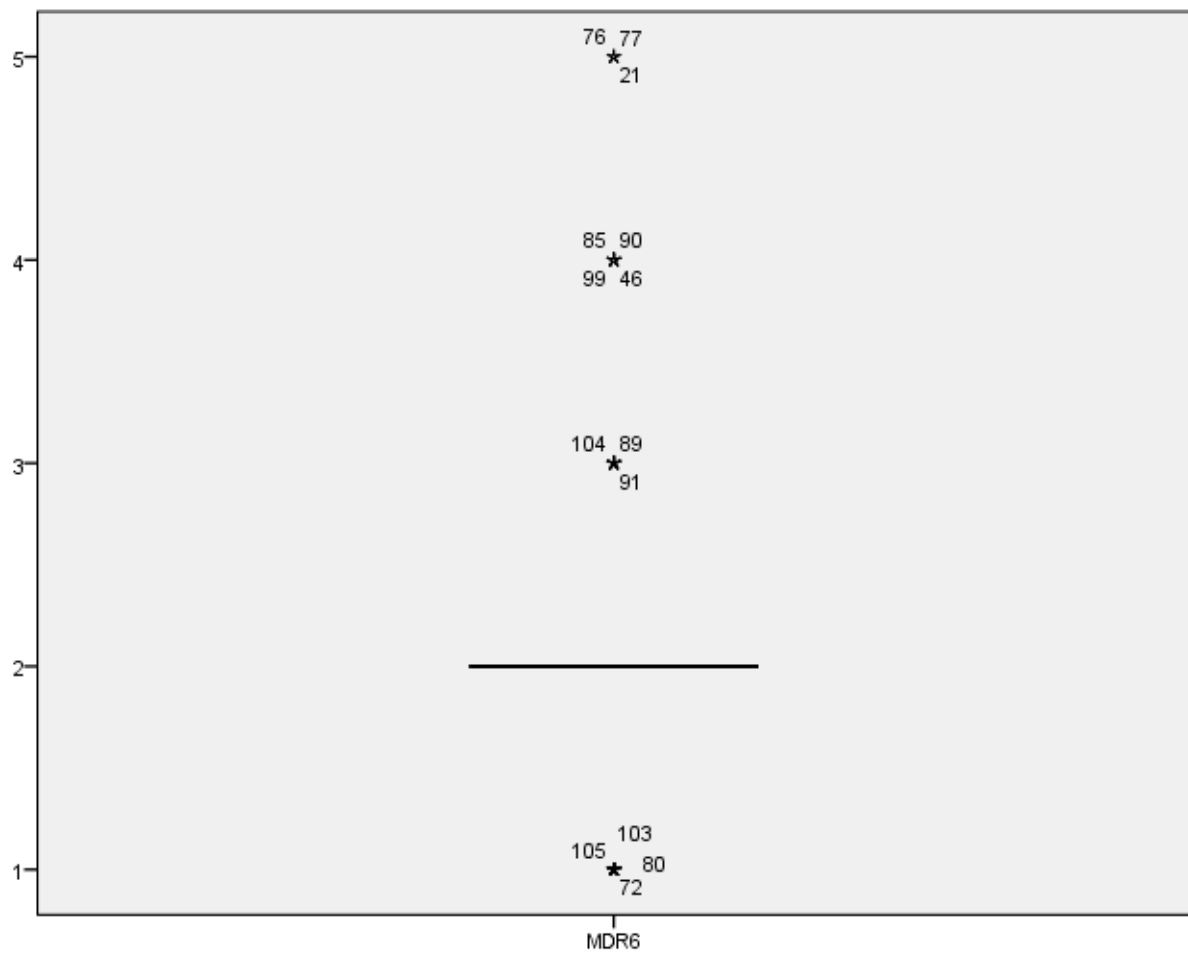

**MDR7**

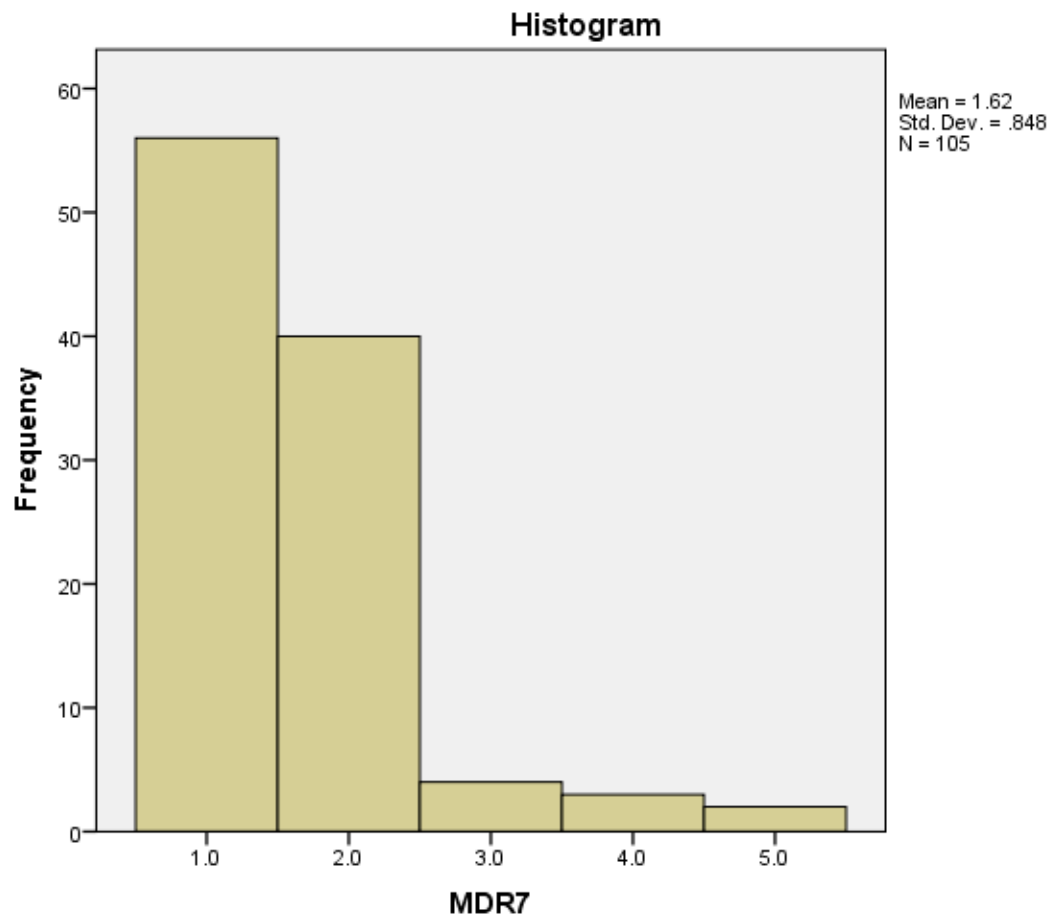

MDR7 Stem-and-Leaf Plot

[illegible]

Normal Q-Q Plot of MDR7

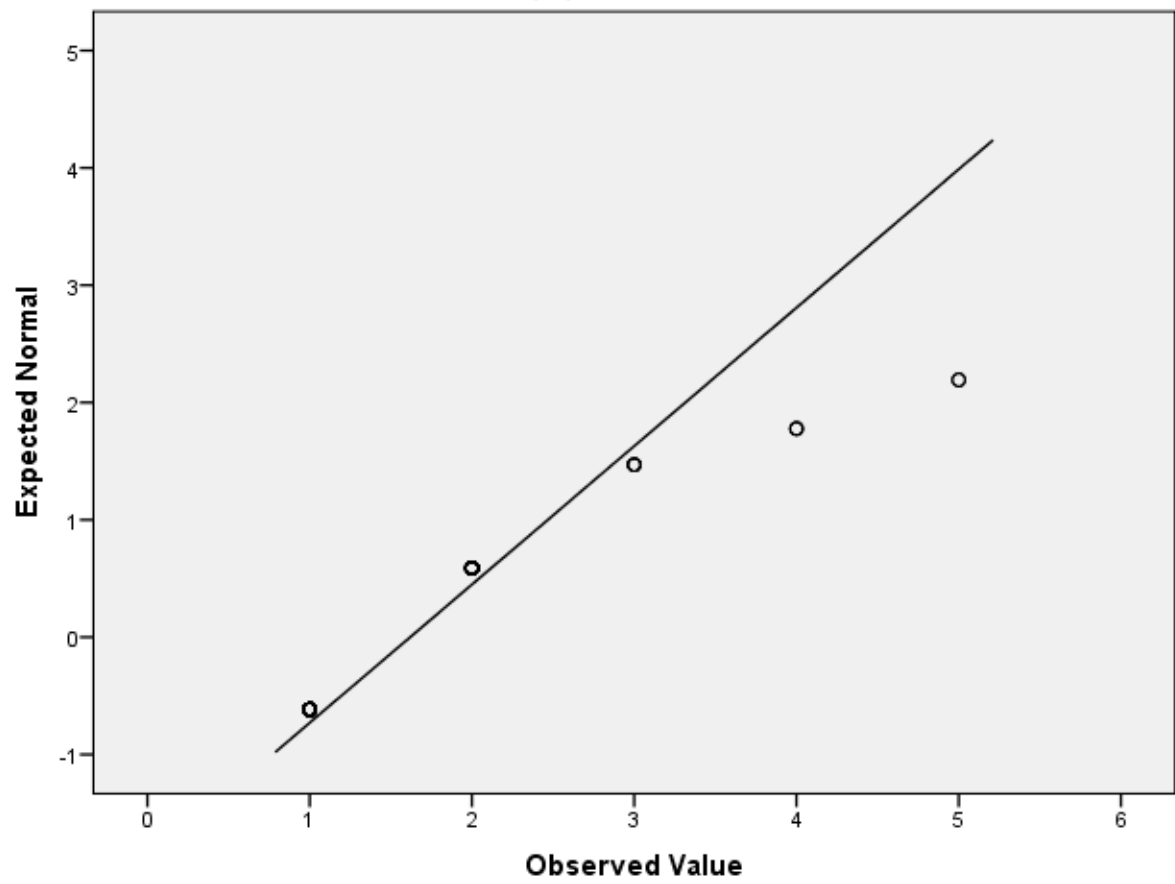

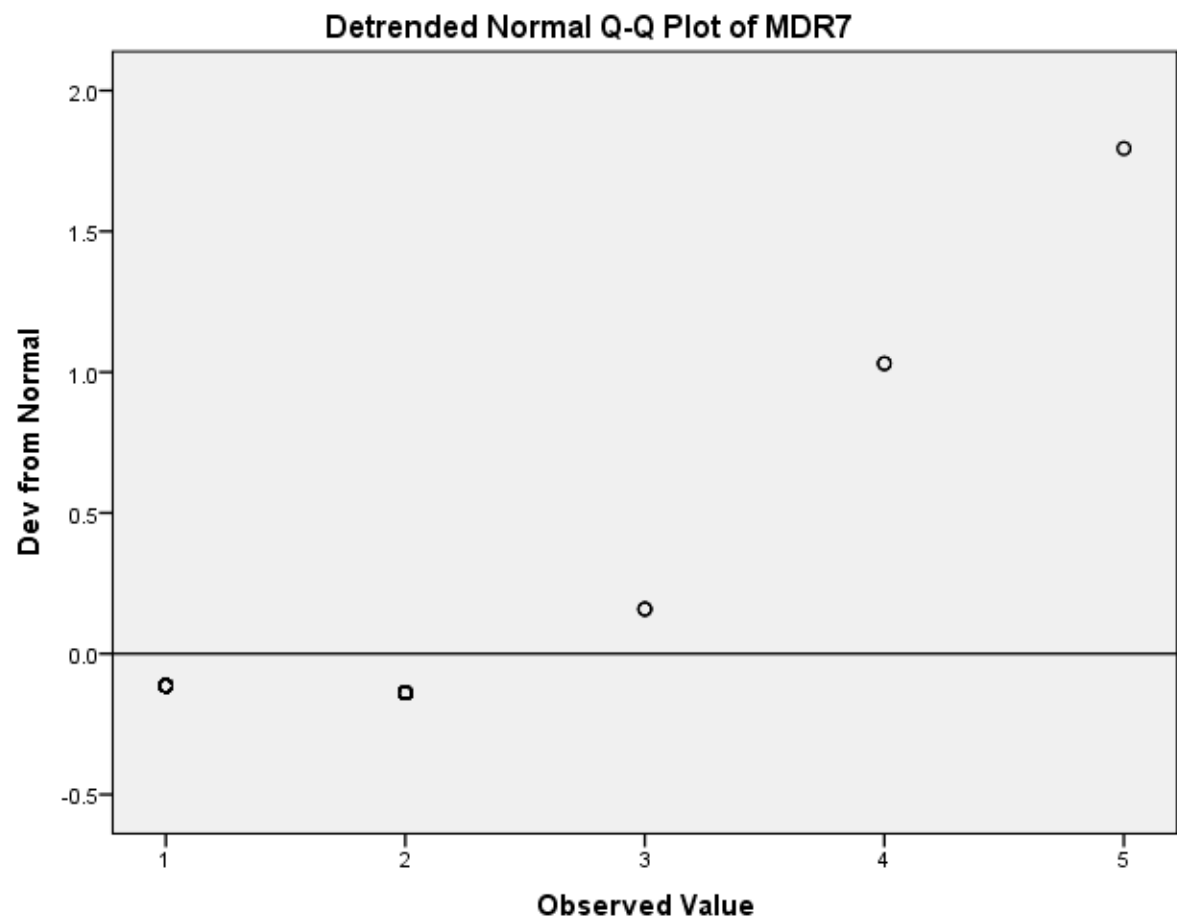

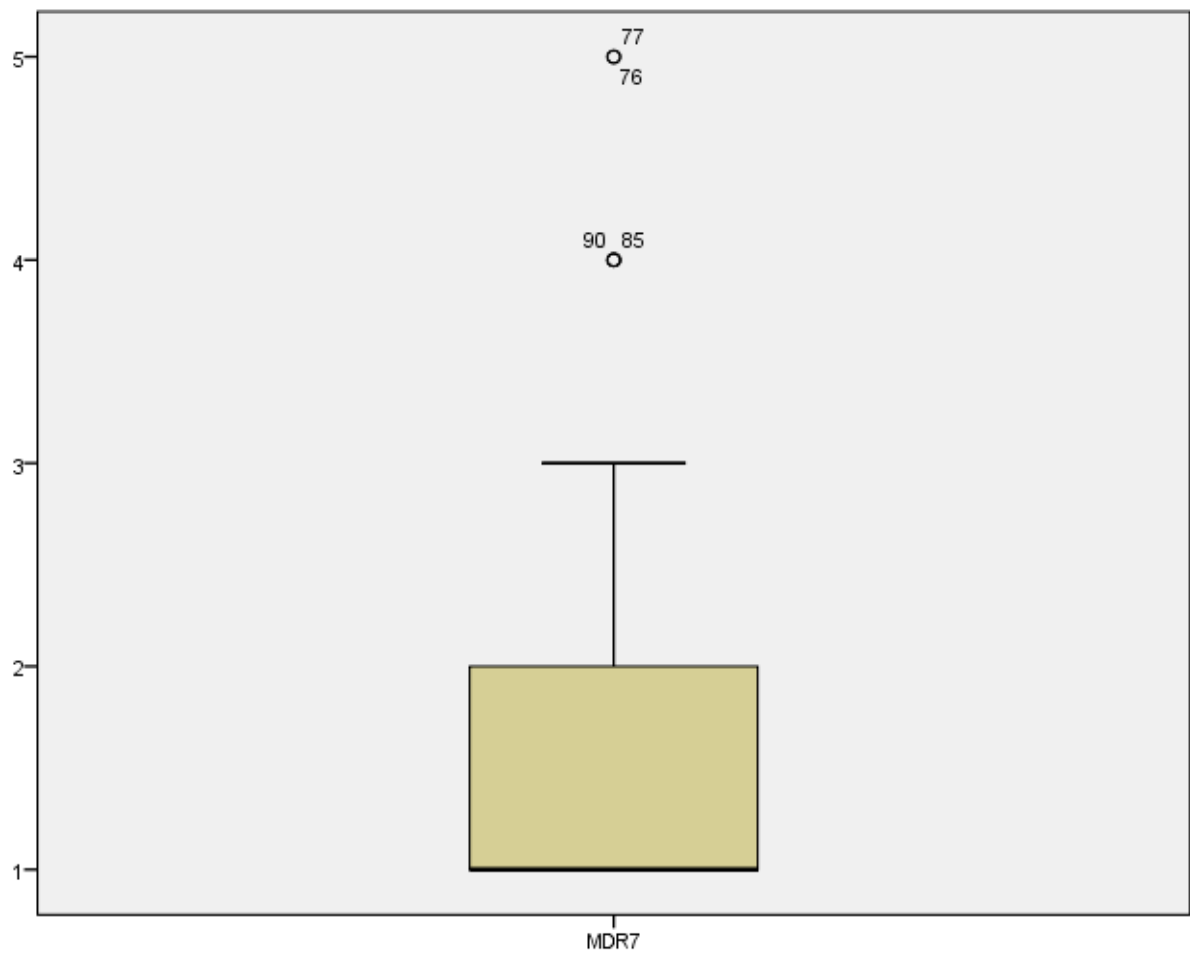

**MDR8**

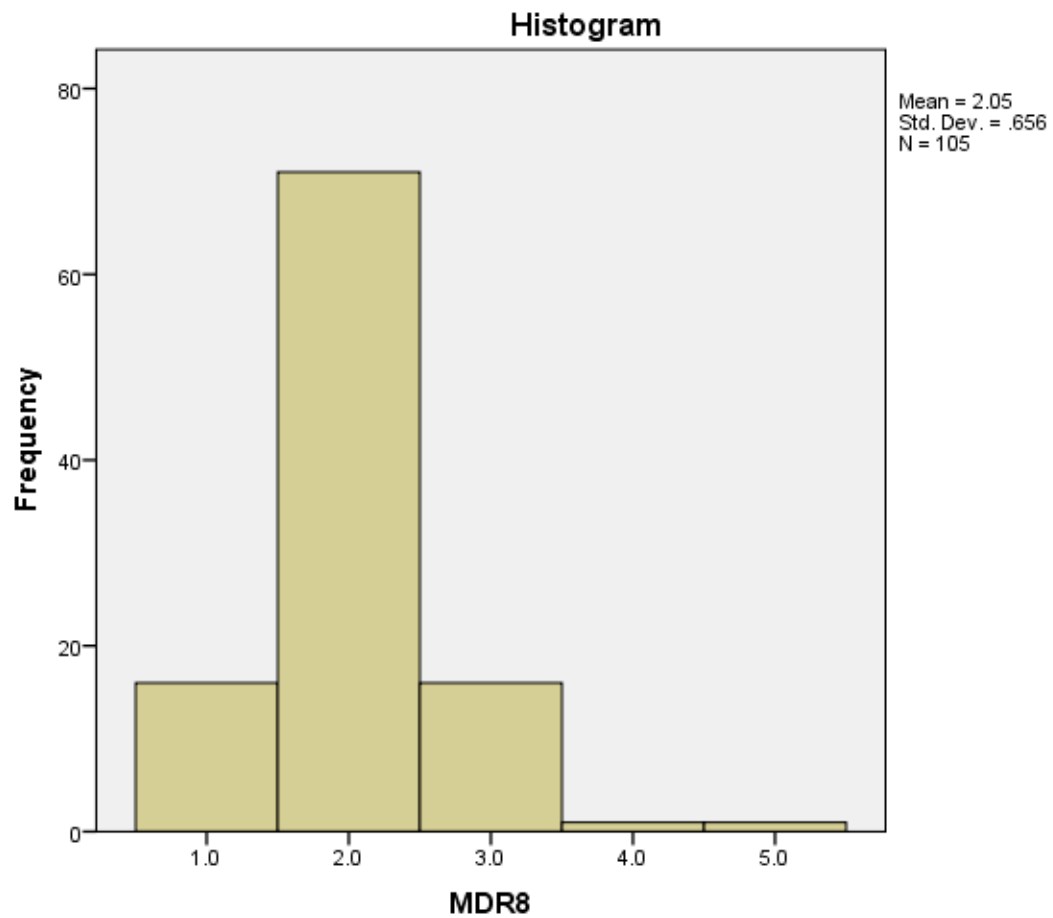

MDR8 Stem-and-Leaf Plot

[illegible]

Normal Q-Q Plot of MDR8

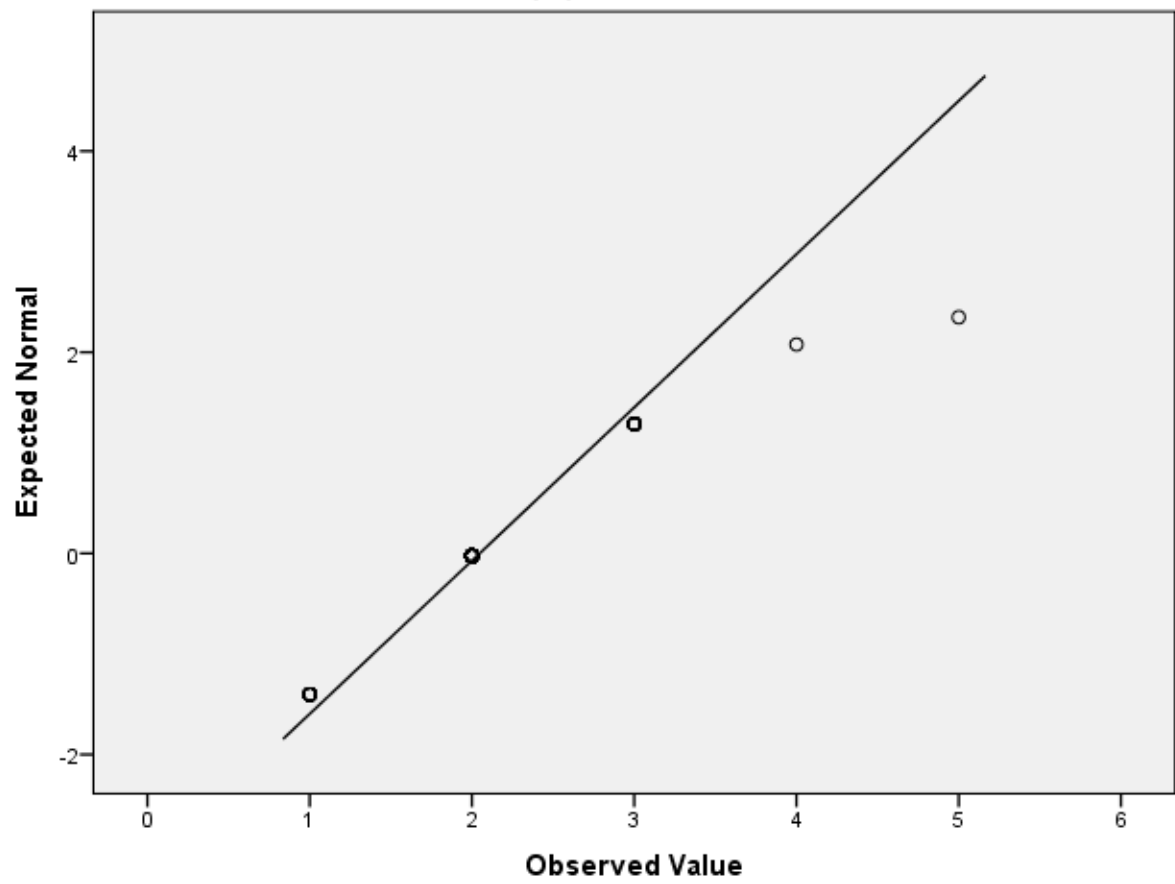

Detrended Normal Q-Q Plot of MDR8

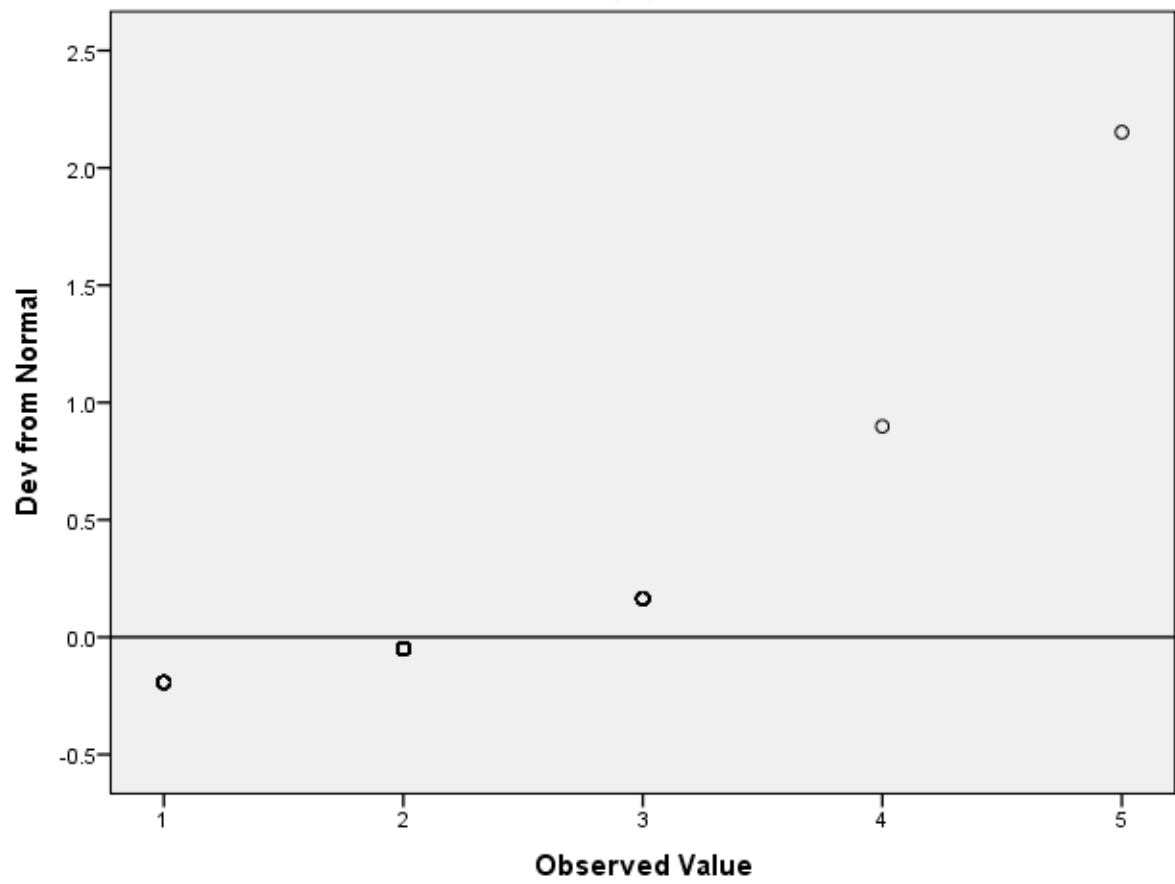



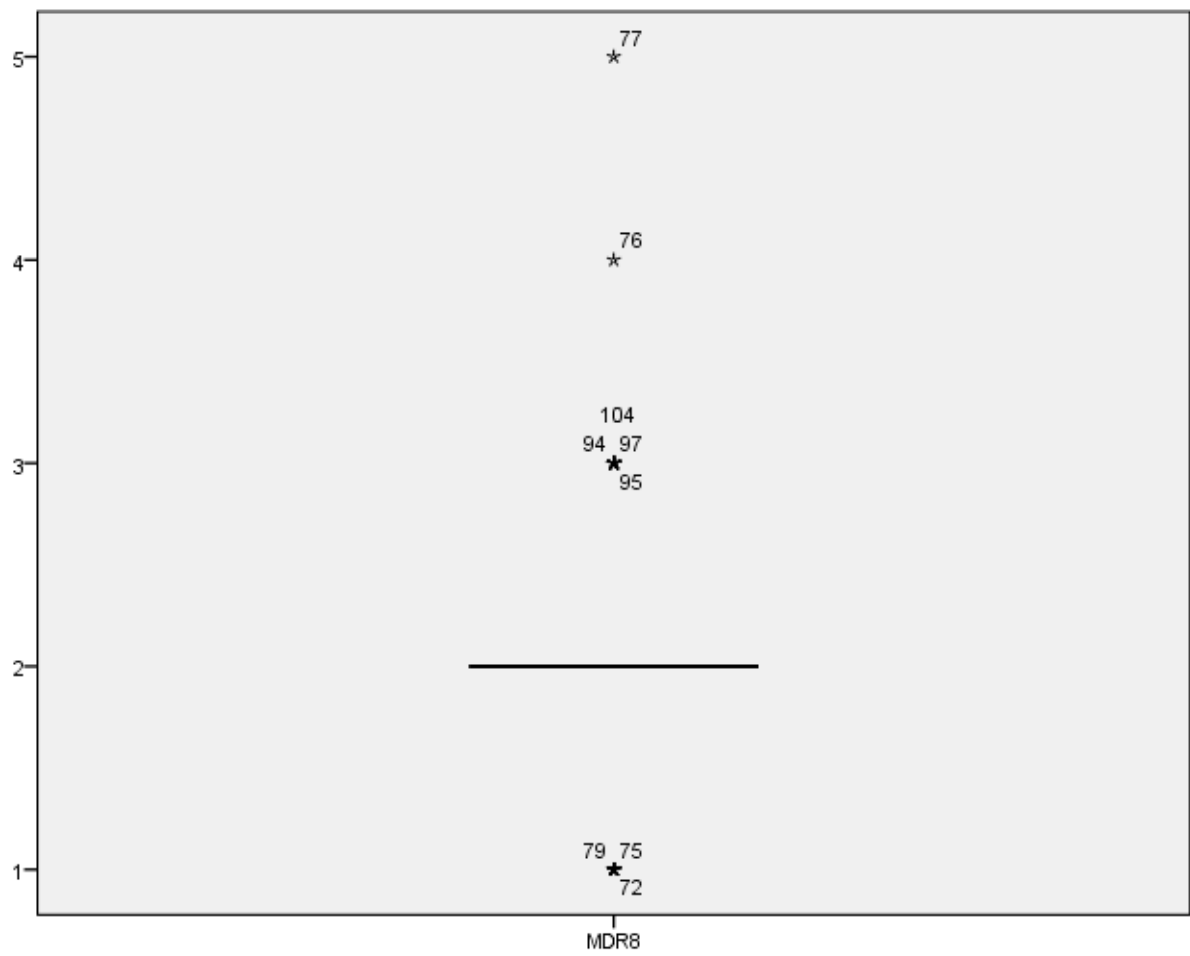

**MDR9**

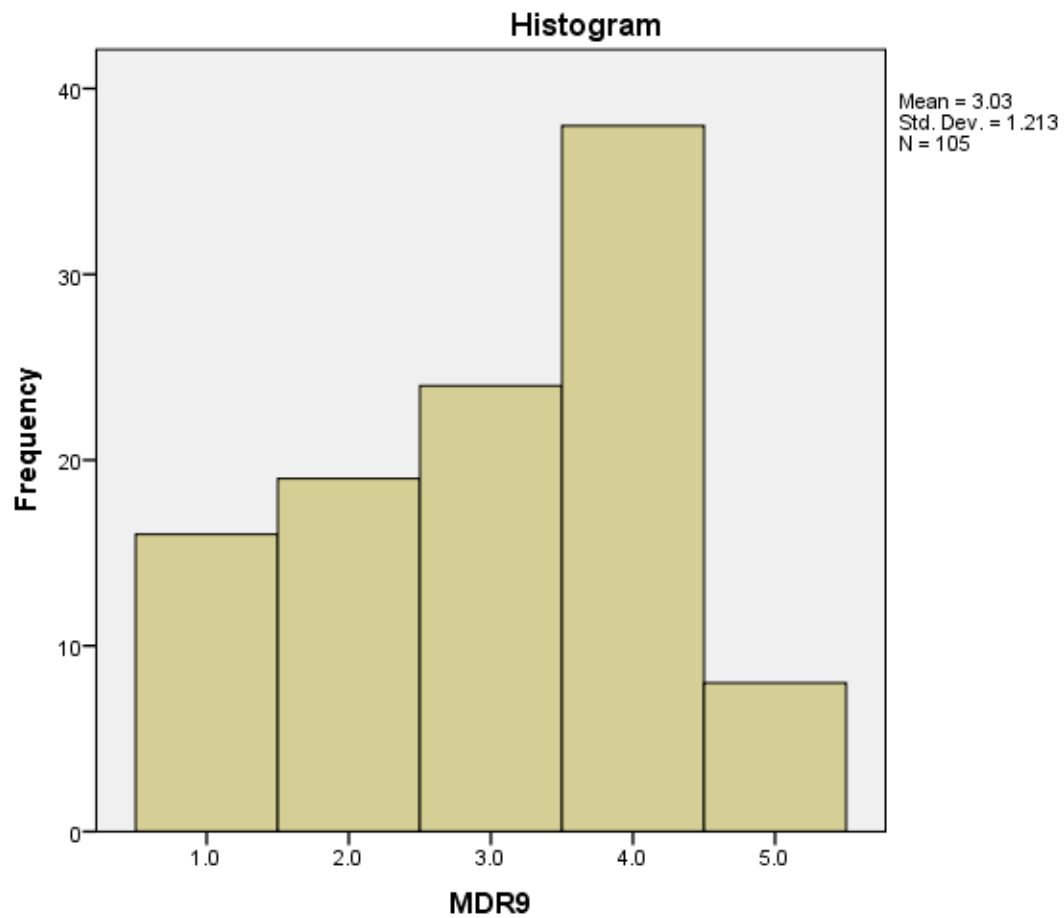

MDR9 Stem-and-Leaf Plot

| Frequency | Stem & | Leaf                                 |
|-----------|--------|--------------------------------------|
| 16.00     | 1 .    | 0000000000000000                     |
| .00       | 1 .    |                                      |
| 19.00     | 2 .    | 000000000000000000                   |
| .00       | 2 .    |                                      |
| 24.00     | 3 .    | 00000000000000000000                 |
| .00       | 3 .    |                                      |
| 38.00     | 4 .    | 000000000000000000000000000000000000 |
| .00       | 4 .    |                                      |
| 8.00      | 5 .    | 00000000                             |

Stem width: 1.0  
Each leaf: 1 case(s)

Normal Q-Q Plot of MDR9

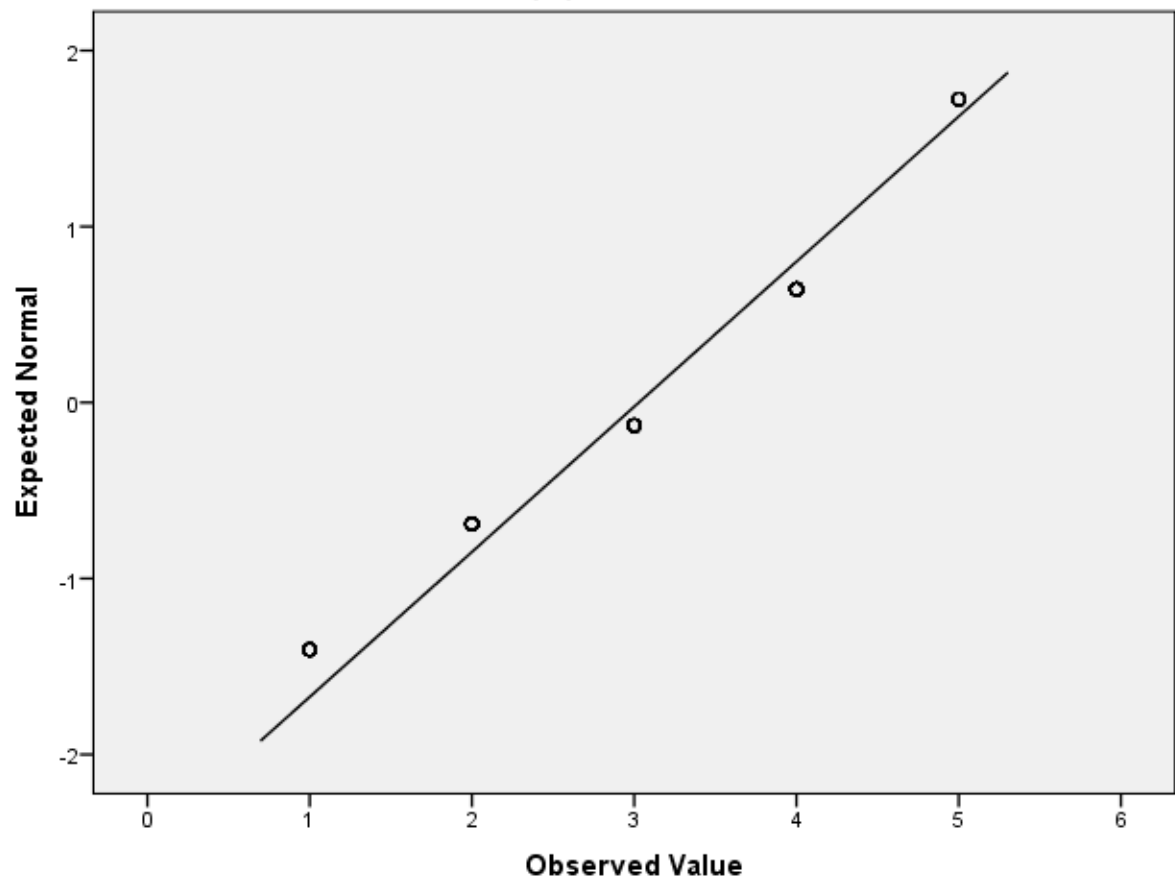

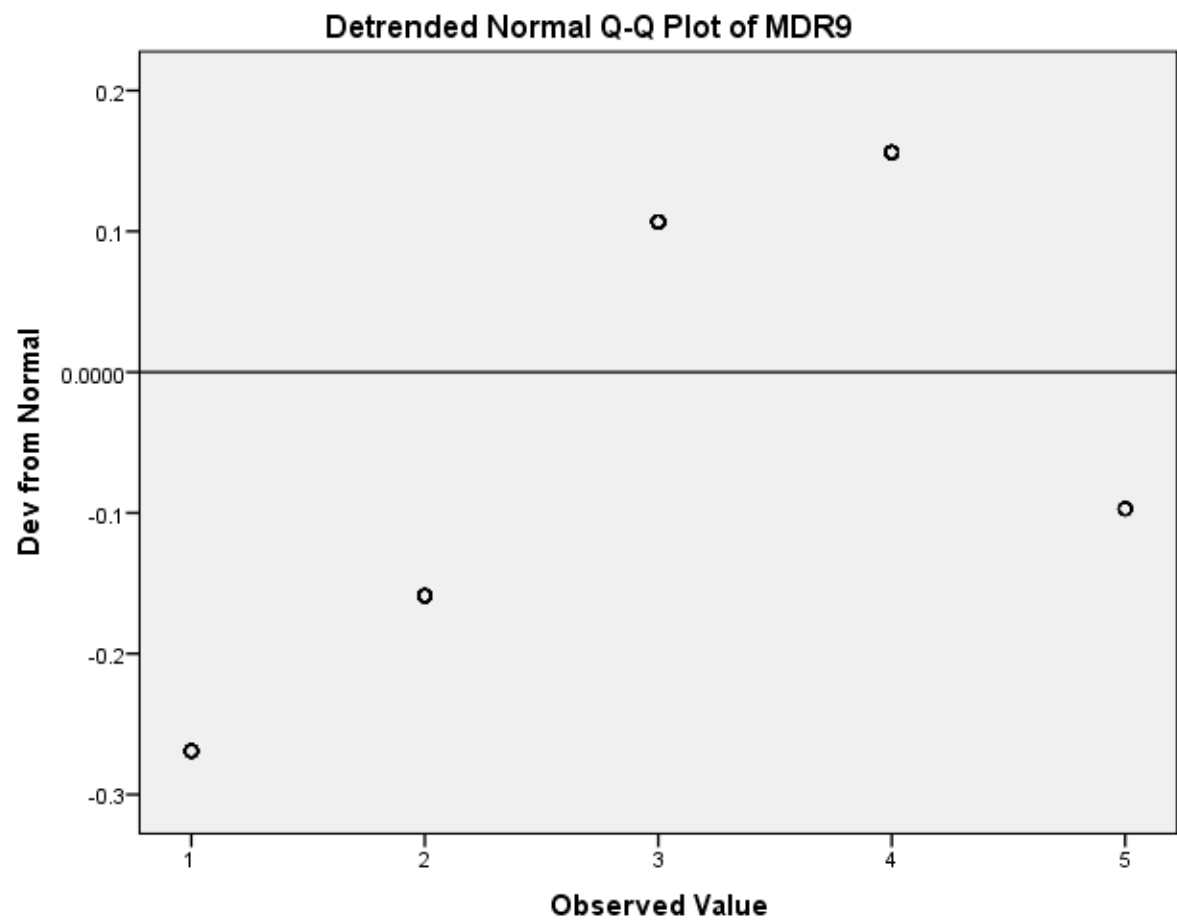

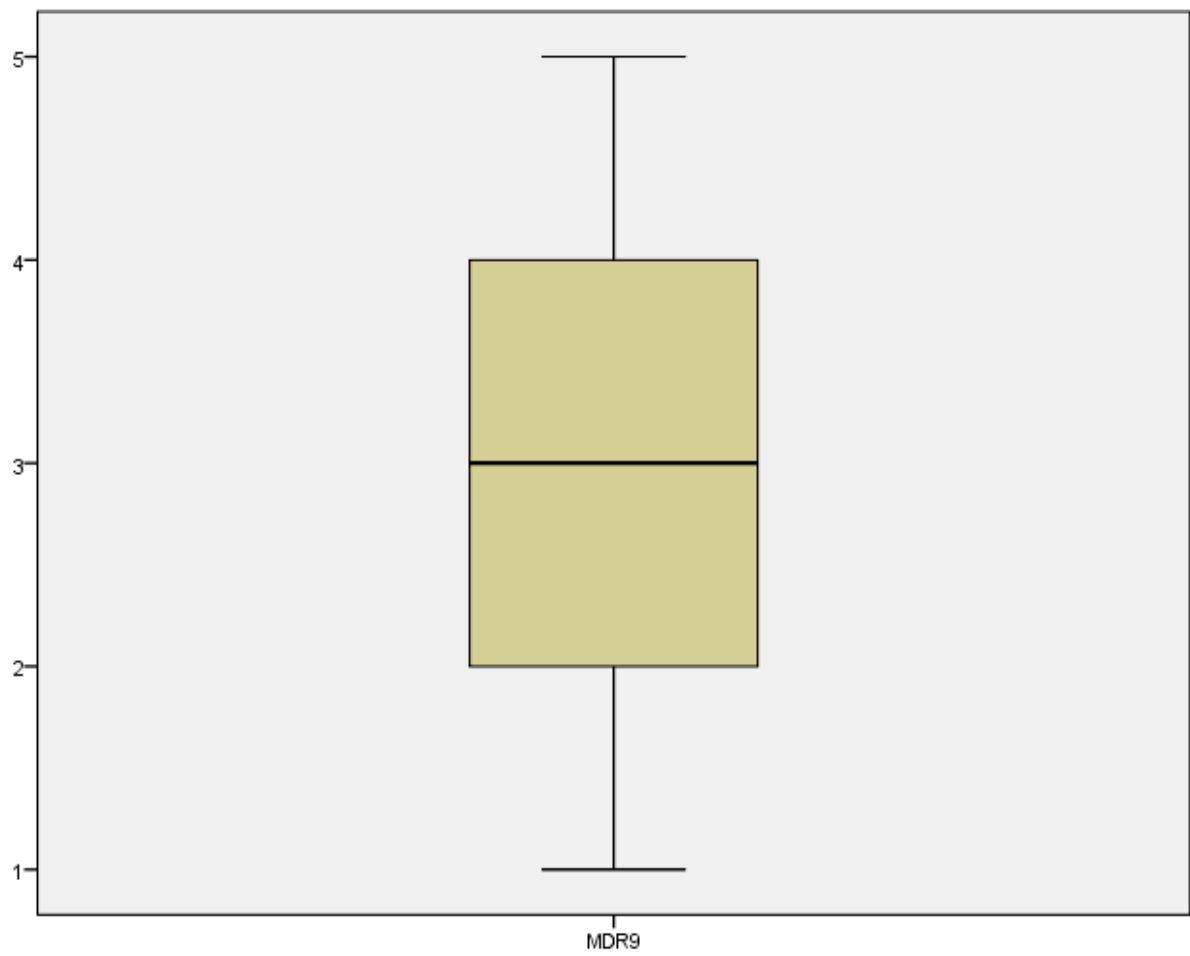

**MDR11**

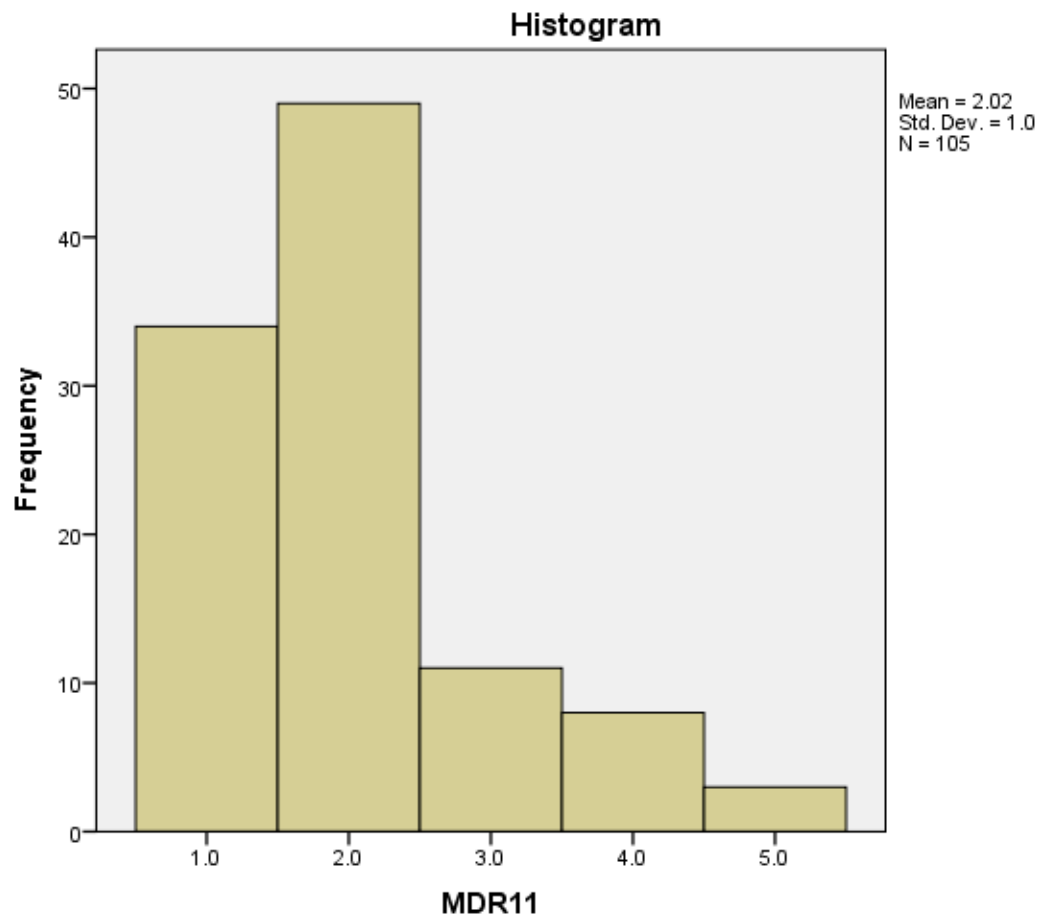

MDR11 Stem-and-Leaf Plot

| Frequency | Stem &   | Leaf                             |
|-----------|----------|----------------------------------|
| 34.00     | 1 .      | 00000000000000000000000000000000 |
| .00       | 1 .      |                                  |
| .00       | 1 .      |                                  |
| .00       | 1 .      |                                  |
| .00       | 1 .      |                                  |
| 49.00     | 2 .      | 00000000000000000000000000000000 |
| .00       | 2 .      |                                  |
| .00       | 2 .      |                                  |
| .00       | 2 .      |                                  |
| .00       | 2 .      |                                  |
| 11.00     | 3 .      | 000000000000                     |
| 11.00     | Extremes | (>=4.0)                          |

Stem width: 1.0  
Each leaf: 1 case(s)

Normal Q-Q Plot of MDR11

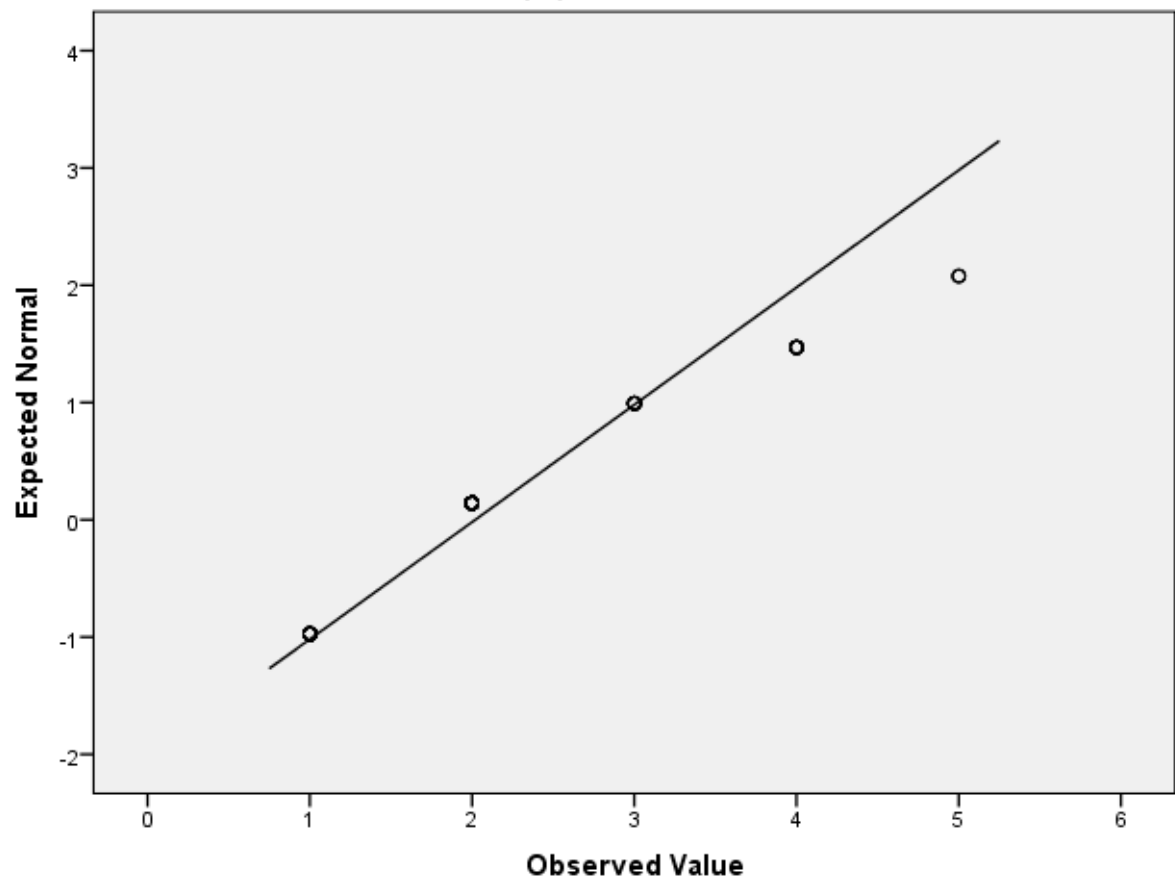

Detrended Normal Q-Q Plot of MDR11





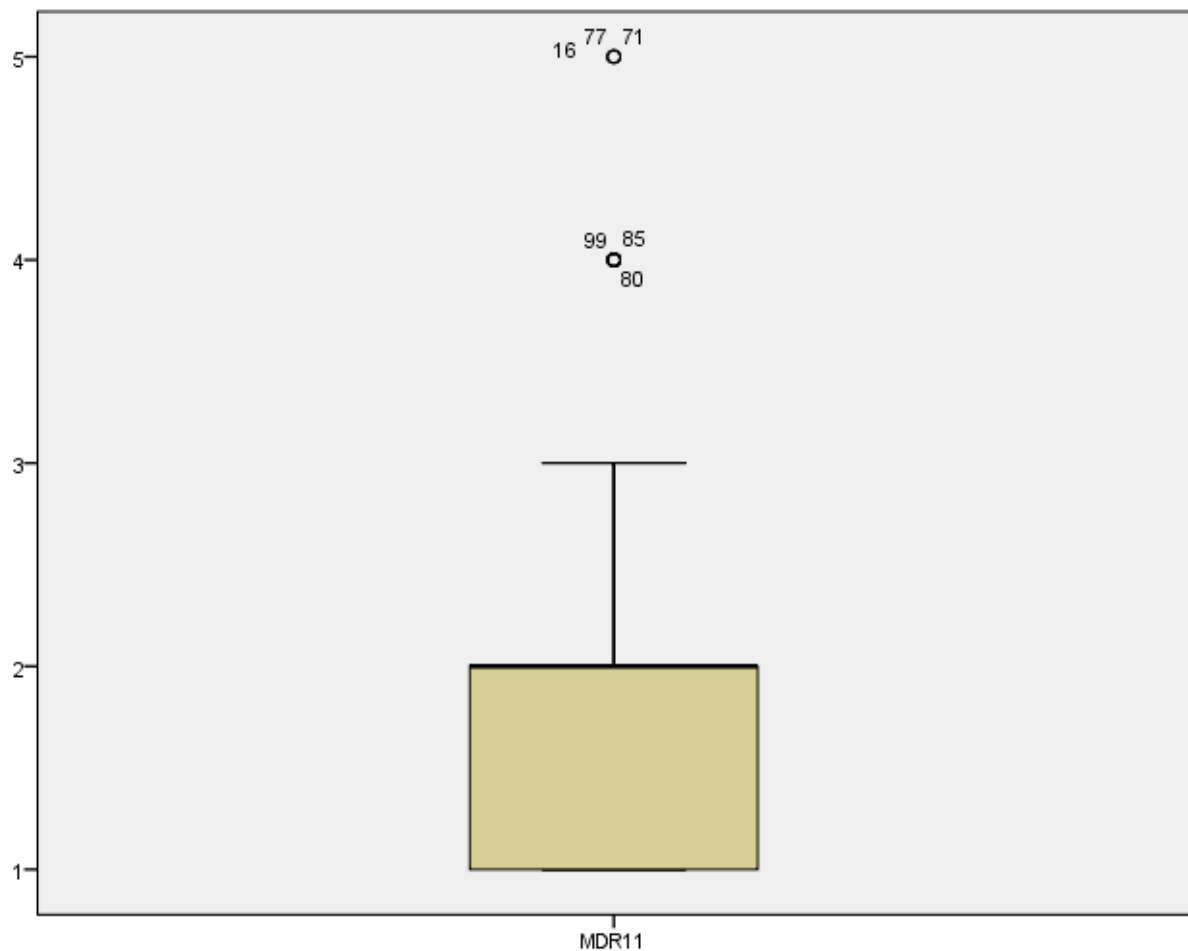

```

EXAMINE VARIABLES=SMEF1 SMEF2 SMEF3 SMEF4 SMEF5 SMEF6
  /PLOT BOXPLOT STEMLEAF HISTOGRAM NPLOT
  /COMPARE GROUPS
  /STATISTICS EXTREME
  /MISSING REPORT
  /NOTOTAL.

```

## Explore

### Notes

|                |                      |                                                                      |
|----------------|----------------------|----------------------------------------------------------------------|
| Output Created | 15-SEP-2022 14:32:49 |                                                                      |
| Comments       |                      |                                                                      |
| Input          | Data                 | C:\DBA\research paper,\German med paper\statistics\110 spss data.sav |
|                | Active Dataset       | DataSet1                                                             |
|                | Filter               | <none>                                                               |

|                        |                                |                                                                                                                                                                                    |             |
|------------------------|--------------------------------|------------------------------------------------------------------------------------------------------------------------------------------------------------------------------------|-------------|
|                        | Weight                         | <none>                                                                                                                                                                             |             |
|                        | Split File                     | <none>                                                                                                                                                                             |             |
|                        | N of Rows in Working Data File |                                                                                                                                                                                    | 110         |
| Missing Value Handling | Definition of Missing          | User-defined missing values for dependent variables are treated as missing. User-defined and system missing values for factors are treated as valid data.                          |             |
|                        | Cases Used                     | Statistics are based on cases with no missing values for any dependent variable or factor used.                                                                                    |             |
| Syntax                 |                                | EXAMINE VARIABLES=SMEF1<br>SMEF2 SMEF3 SMEF4 SMEF5<br>SMEF6<br>/PLOT BOXPLOT STEMLEAF<br>HISTOGRAM NPLOT<br>/COMPARE GROUPS<br>/STATISTICS EXTREME<br>/MISSING REPORT<br>/NOTOTAL. |             |
| Resources              | Processor Time                 |                                                                                                                                                                                    | 00:00:02.03 |
|                        | Elapsed Time                   |                                                                                                                                                                                    | 00:00:02.00 |

[DataSet1] C:\DBA\research paper,\German med paper\statistics\110 spss data.sav

#### Case Processing Summary

|       | Cases |         |         |         |       |         |
|-------|-------|---------|---------|---------|-------|---------|
|       | Valid |         | Missing |         | Total |         |
|       | N     | Percent | N       | Percent | N     | Percent |
| SMEF1 | 110   | 100.0%  | 0       | 0.0%    | 110   | 100.0%  |
| SMEF2 | 110   | 100.0%  | 0       | 0.0%    | 110   | 100.0%  |
| SMEF3 | 110   | 100.0%  | 0       | 0.0%    | 110   | 100.0%  |
| SMEF4 | 110   | 100.0%  | 0       | 0.0%    | 110   | 100.0%  |
| SMEF5 | 110   | 100.0%  | 0       | 0.0%    | 110   | 100.0%  |
| SMEF6 | 110   | 100.0%  | 0       | 0.0%    | 110   | 100.0%  |

#### Extreme Values

|       |         |   | Case Number | Value            |
|-------|---------|---|-------------|------------------|
| SMEF1 | Highest | 1 | 76          | 5.0              |
|       |         | 2 | 77          | 5.0              |
|       |         | 3 | 2           | 4.0              |
|       |         | 4 | 57          | 4.0              |
|       |         | 5 | 59          | 4.0 <sup>a</sup> |
|       | Lowest  | 1 | 96          | 1.0              |
|       |         | 2 | 93          | 1.0              |
|       |         | 3 | 42          | 1.0              |
|       |         | 4 | 9           | 1.0              |
|       |         | 5 | 7           | 1.0 <sup>b</sup> |
| SMEF2 | Highest | 1 | 76          | 5.0              |
|       |         | 2 | 77          | 5.0              |
|       |         | 3 | 85          | 4.0              |
|       |         | 4 | 21          | 3.0              |
|       |         | 5 | 43          | 3.0 <sup>c</sup> |
|       | Lowest  | 1 | 110         | 1.0              |
|       |         | 2 | 103         | 1.0              |
|       |         | 3 | 96          | 1.0              |
|       |         | 4 | 82          | 1.0              |
|       |         | 5 | 81          | 1.0 <sup>b</sup> |
| SMEF3 | Highest | 1 | 4           | 5.0              |
|       |         | 2 | 1           | 4.0              |
|       |         | 3 | 41          | 4.0              |
|       |         | 4 | 51          | 4.0              |
|       |         | 5 | 52          | 4.0 <sup>a</sup> |
|       | Lowest  | 1 | 102         | 1.0              |
|       |         | 2 | 81          | 1.0              |
|       |         | 3 | 72          | 1.0              |
|       |         | 4 | 62          | 1.0              |
|       |         | 5 | 33          | 1.0 <sup>b</sup> |
| SMEF4 | Highest | 1 | 76          | 5.0              |
|       |         | 2 | 77          | 5.0              |
|       |         | 3 | 20          | 4.0              |
|       |         | 4 | 21          | 4.0              |
|       |         | 5 | 56          | 4.0 <sup>a</sup> |
|       | Lowest  | 1 | 103         | 1.0              |
|       |         | 2 | 82          | 1.0              |
|       |         | 3 | 81          | 1.0              |
|       |         | 4 | 79          | 1.0              |
|       |         | 5 | 75          | 1.0 <sup>b</sup> |
| SMEF5 | Highest | 1 | 72          | 4.0              |

|       |         |   |     |                  |
|-------|---------|---|-----|------------------|
| SMEF6 |         | 2 | 85  | 4.0              |
|       |         | 3 | 90  | 4.0              |
|       |         | 4 | 99  | 4.0              |
|       |         | 5 | 5   | 3.0 <sup>c</sup> |
|       |         | 1 | 110 | 1.0              |
|       | Lowest  | 2 | 93  | 1.0              |
|       |         | 3 | 75  | 1.0              |
|       |         | 4 | 71  | 1.0              |
|       |         | 5 | 53  | 1.0 <sup>b</sup> |
|       |         | 1 | 4   | 5.0              |
|       | Highest | 2 | 7   | 5.0              |
|       |         | 3 | 13  | 5.0              |
|       |         | 4 | 56  | 5.0              |
|       |         | 5 | 74  | 5.0 <sup>d</sup> |
|       |         | 1 | 90  | 1.0              |
|       | Lowest  | 2 | 85  | 1.0              |
|       |         | 3 | 77  | 1.0              |
|       |         | 4 | 76  | 1.0              |
|       |         | 5 | 72  | 1.0 <sup>b</sup> |

a. Only a partial list of cases with the value 4.0 are shown in the table of upper extremes.

b. Only a partial list of cases with the value 1.0 are shown in the table of lower extremes.

c. Only a partial list of cases with the value 3.0 are shown in the table of upper extremes.

d. Only a partial list of cases with the value 5.0 are shown in the table of upper extremes.

#### Tests of Normality

|       | Kolmogorov-Smirnov <sup>a</sup> |     |      | Shapiro-Wilk |     |      |
|-------|---------------------------------|-----|------|--------------|-----|------|
|       | Statistic                       | df  | Sig. | Statistic    | df  | Sig. |
| SMEF1 | .392                            | 110 | .000 | .730         | 110 | .000 |
| SMEF2 | .315                            | 110 | .000 | .732         | 110 | .000 |
| SMEF3 | .282                            | 110 | .000 | .850         | 110 | .000 |
| SMEF4 | .343                            | 110 | .000 | .795         | 110 | .000 |
| SMEF5 | .365                            | 110 | .000 | .757         | 110 | .000 |
| SMEF6 | .178                            | 110 | .000 | .911         | 110 | .000 |

a. Lilliefors Significance Correction

**SMEF1**

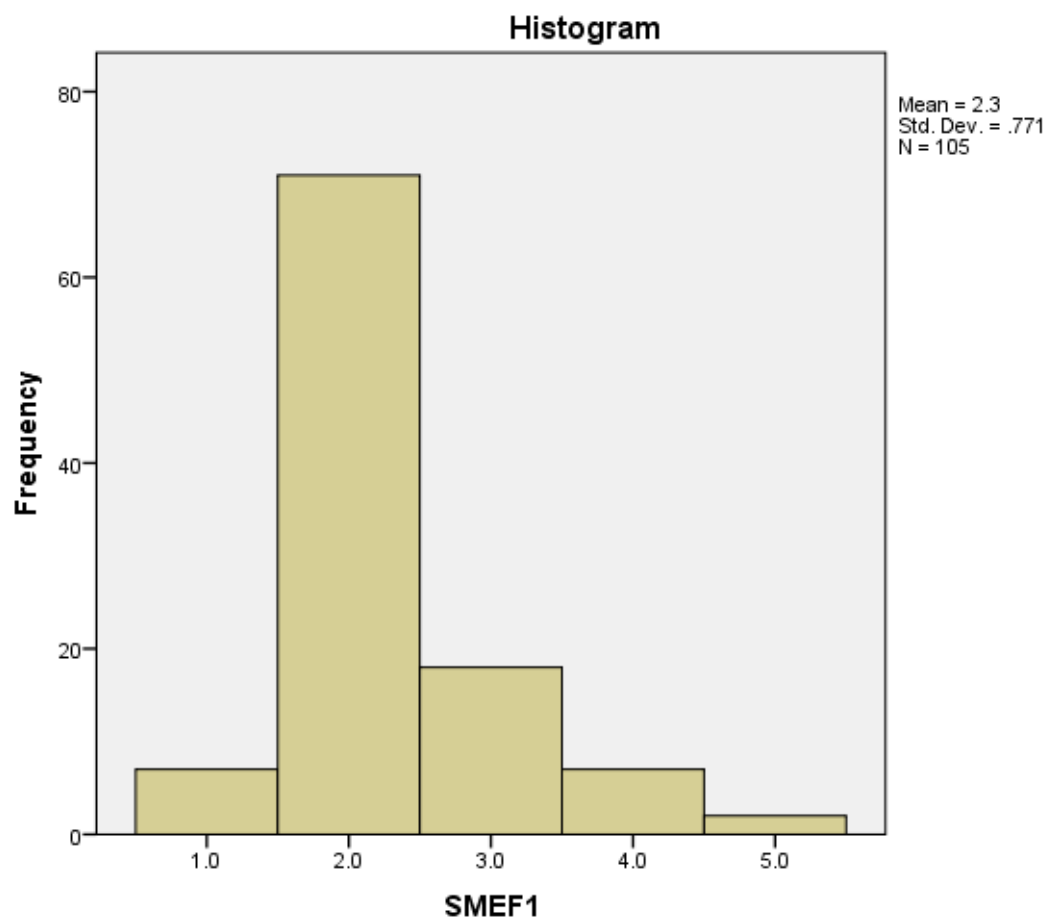

SMEF1 Stem-and-Leaf Plot

[illegible]

|      |          |   |         |
|------|----------|---|---------|
| .00  | 3        | . |         |
| .00  | 3        | . |         |
| .00  | 3        | . |         |
| 7.00 | 4        | . | 0000000 |
| 2.00 | Extremes |   | (>=5.0) |

Stem width: 1.0  
Each leaf: 1 case(s)

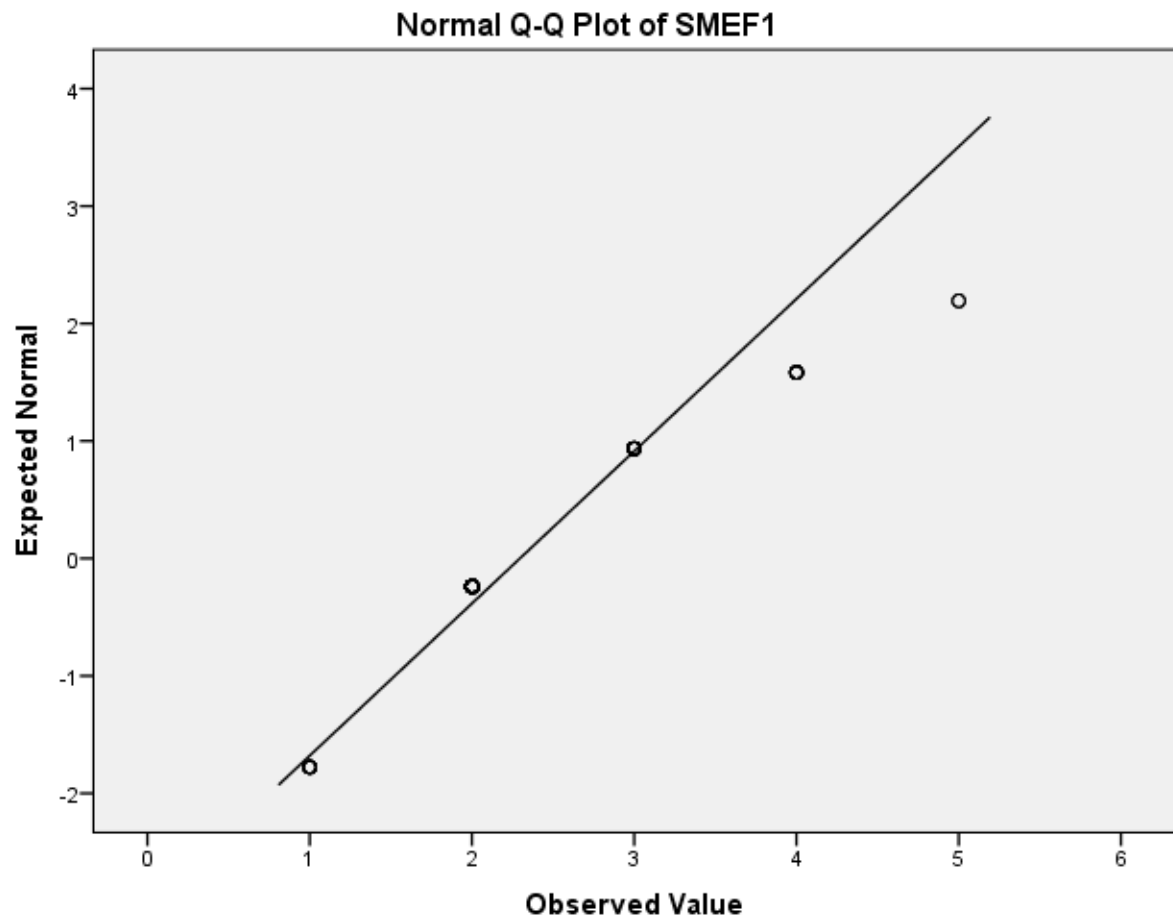

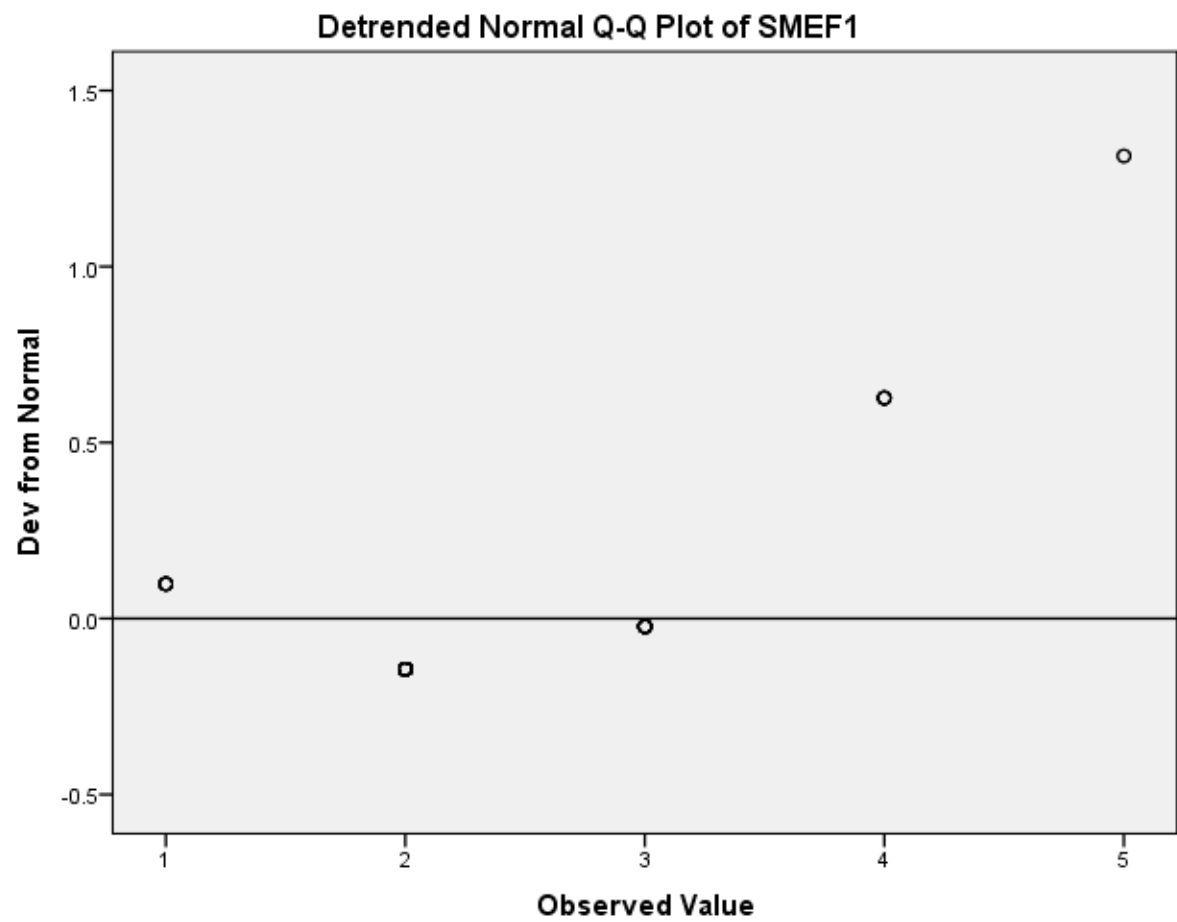

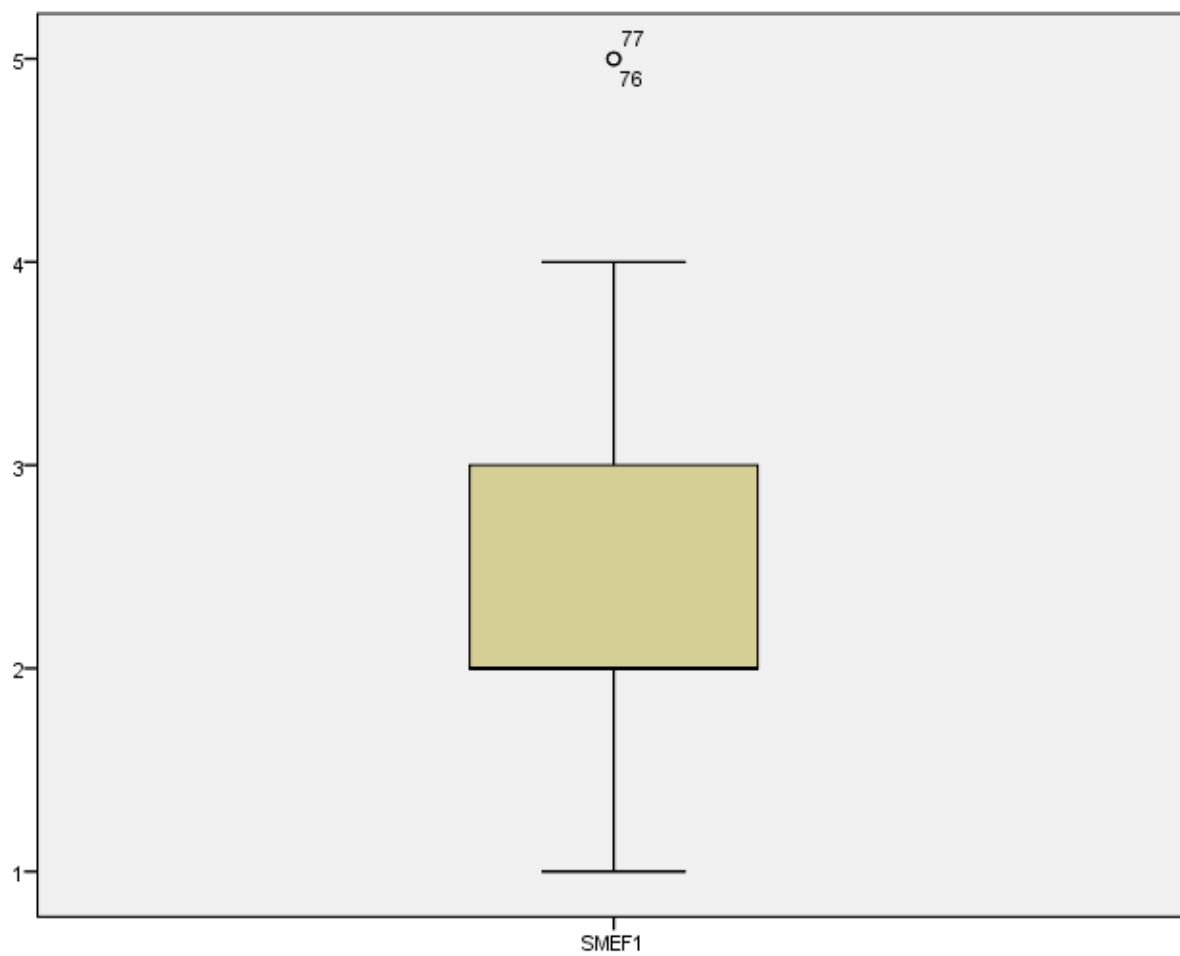

**SMEF2**



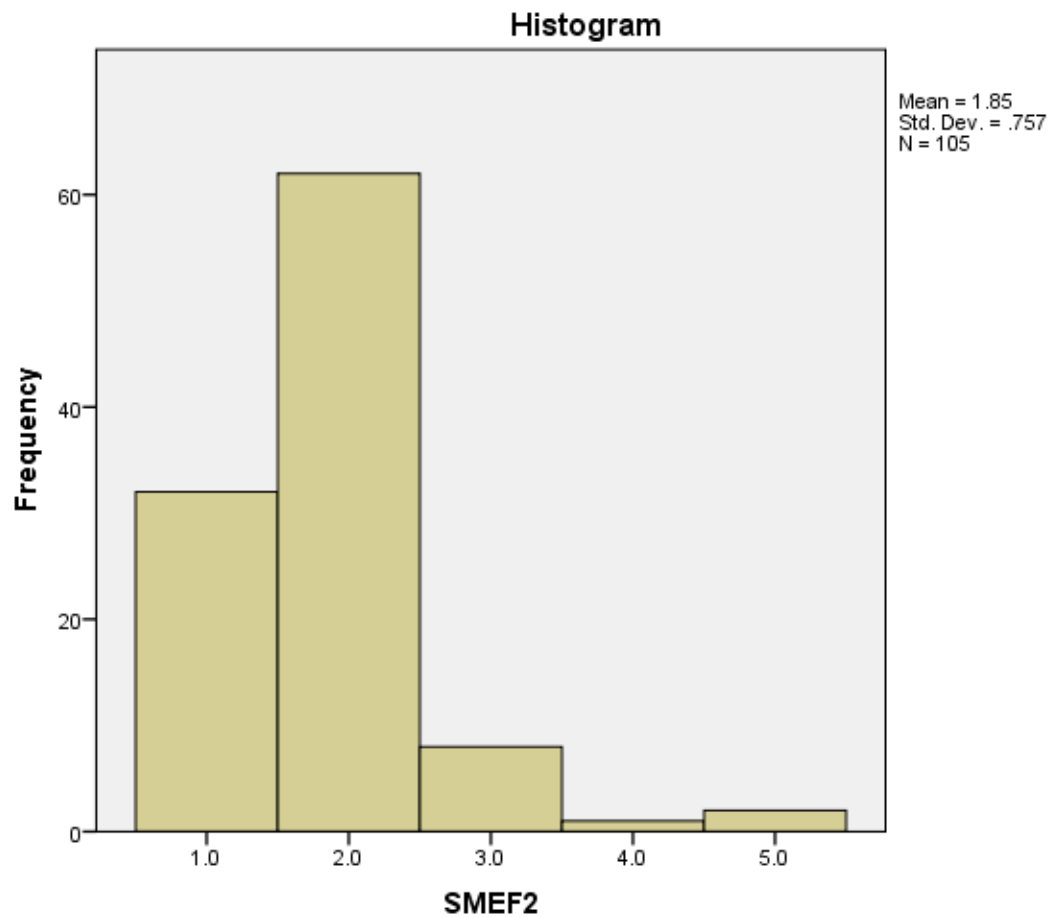

SMEF2 Stem-and-Leaf Plot

```

Frequency      Stem &  Leaf

  32.00         1 .  00000000000000000000000000000000
   .00         1 .
   .00         1 .
   .00         1 .
   .00         1 .
  62.00         2 .
0000000000000000000000000000000000000000000000000000000000000000
   .00         2 .
   .00         2 .
   .00         2 .
   .00         2 .
   8.00         3 .  00000000
   3.00 Extremes      (>=4.0)

Stem width:      1.0
Each leaf:       1 case(s)

```

Normal Q-Q Plot of SMEF2

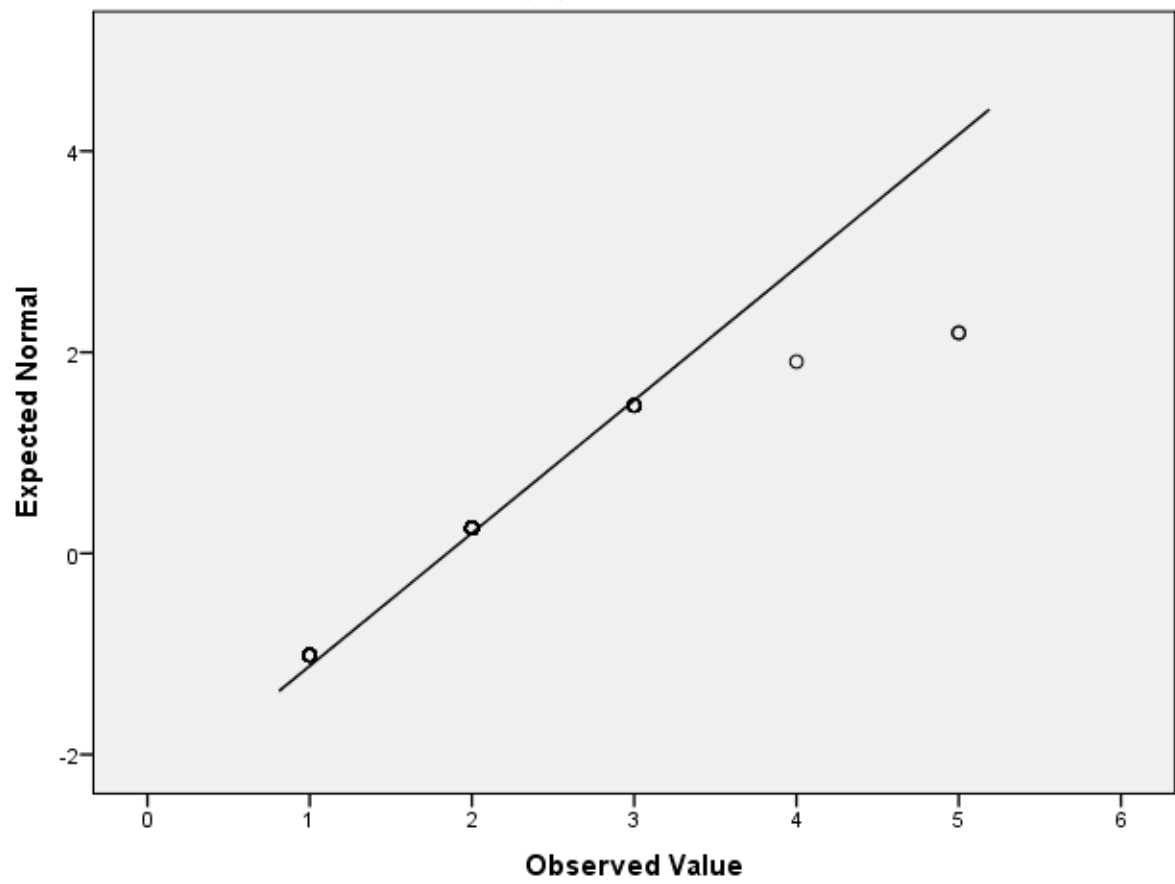

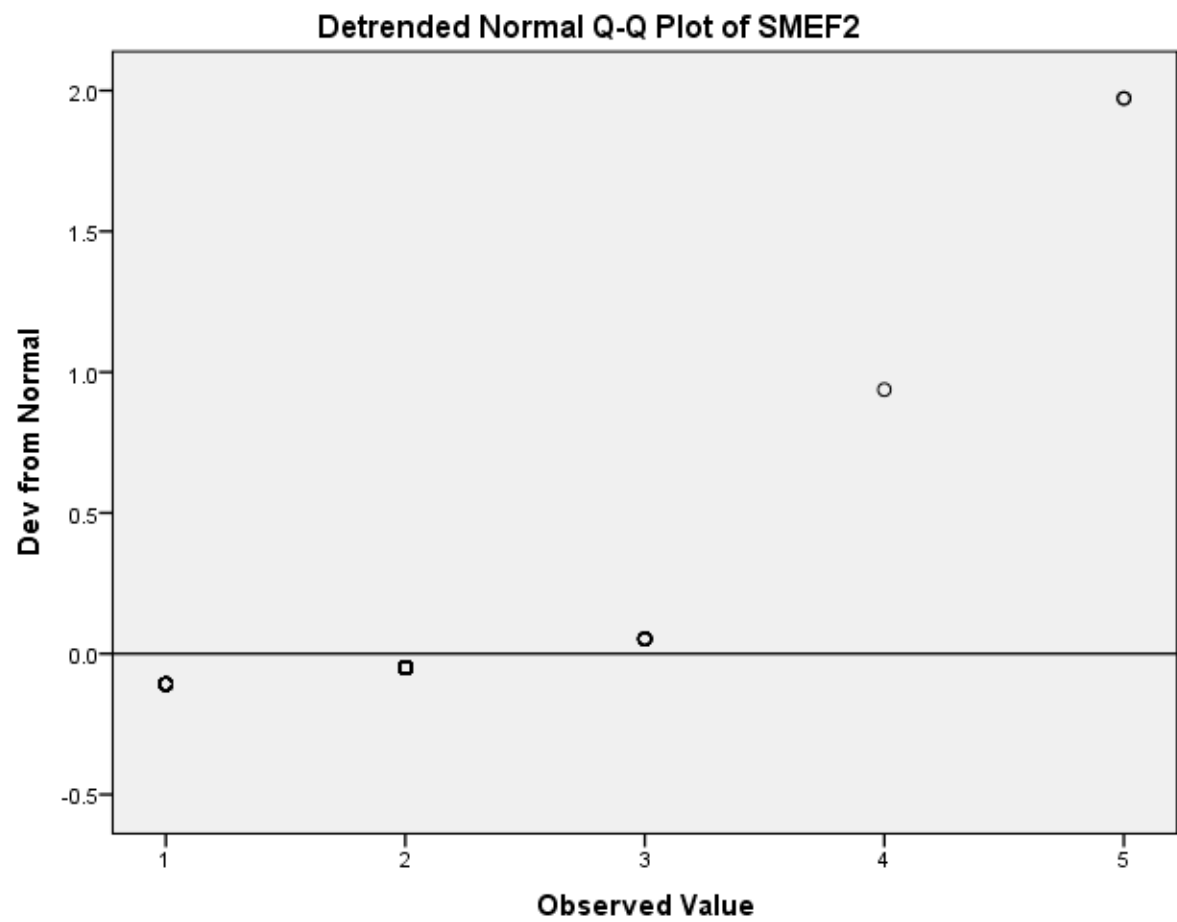

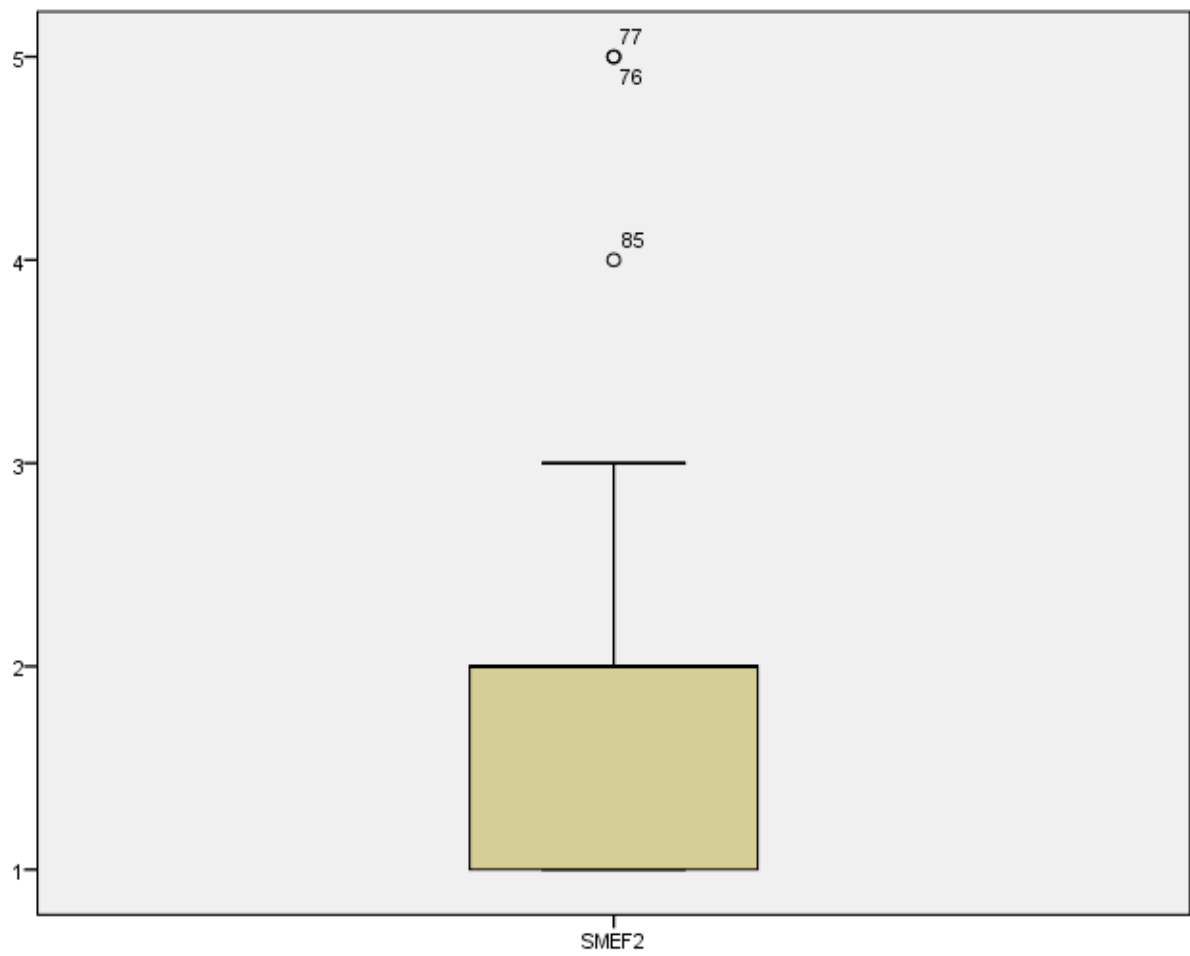

**SMEF3**

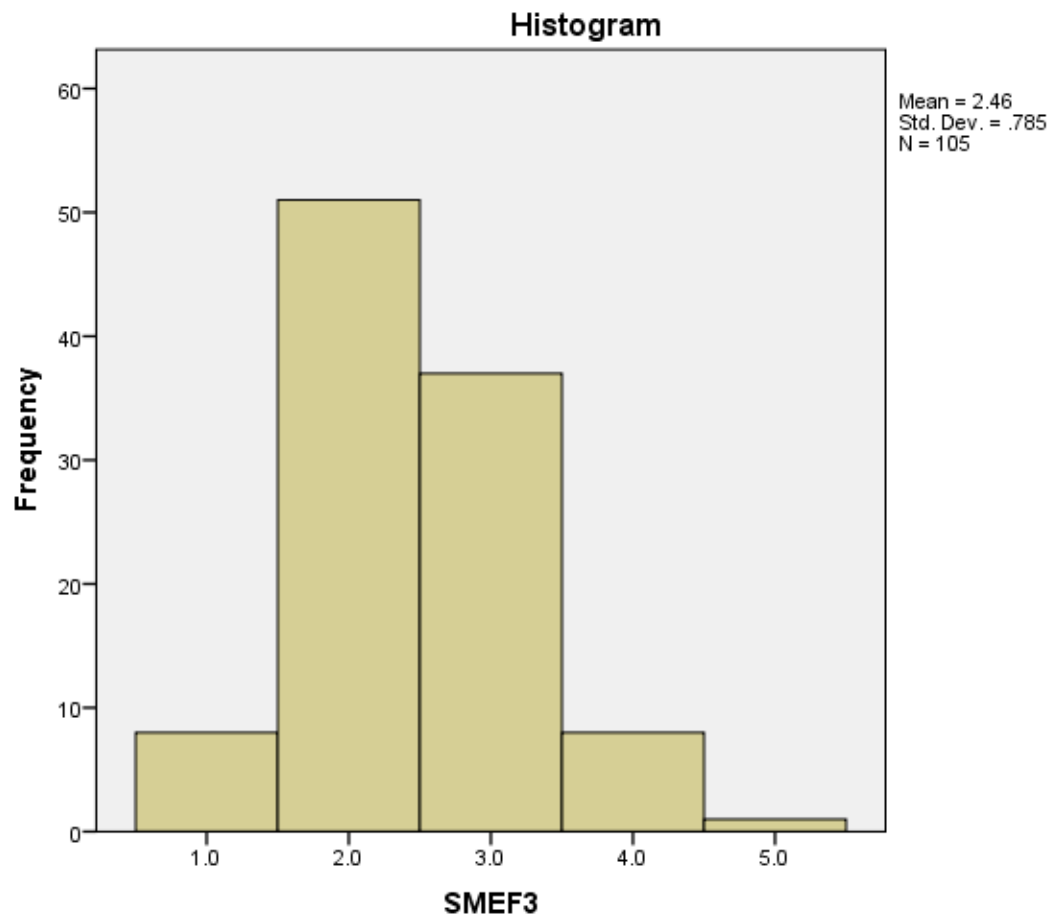

SMEF3 Stem-and-Leaf Plot

[illegible]

```
Stem width:      1.0
Each leaf:      1 case(s)
```

Normal Q-Q Plot of SMEF3

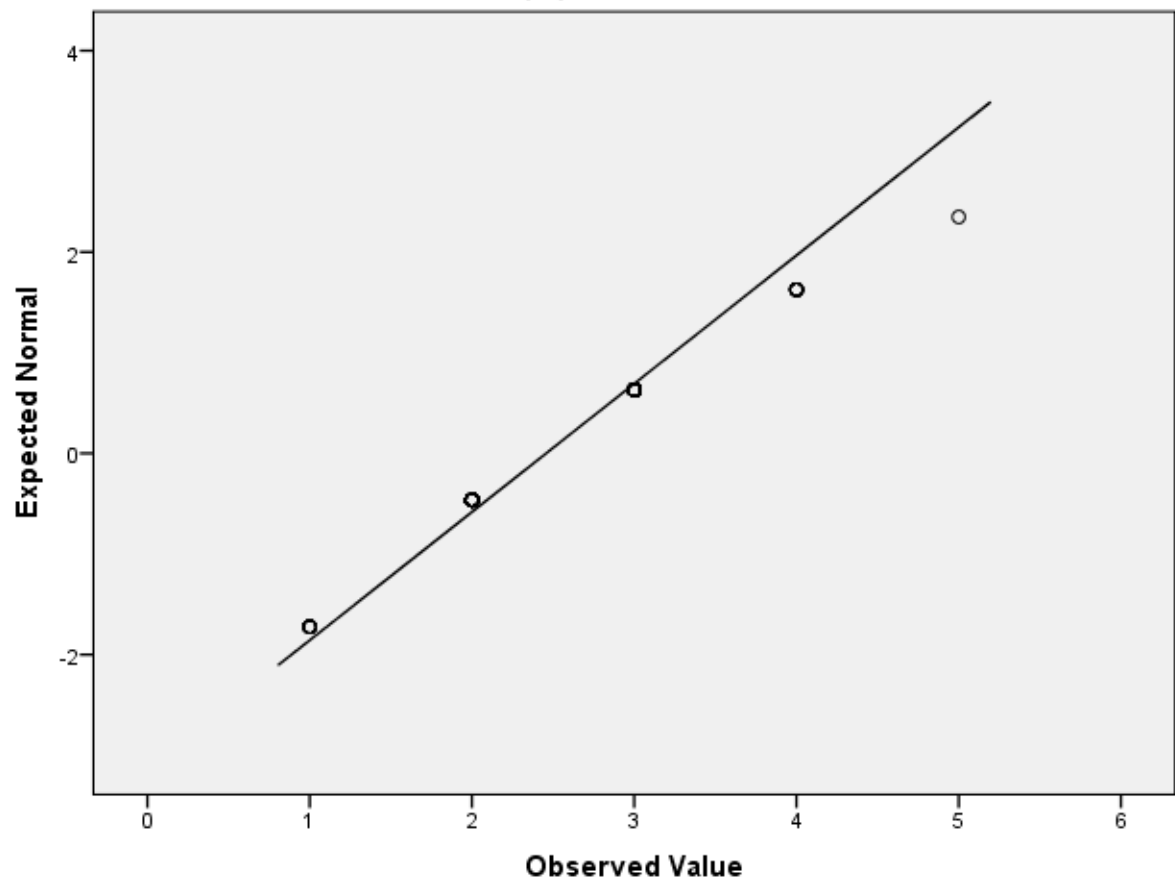

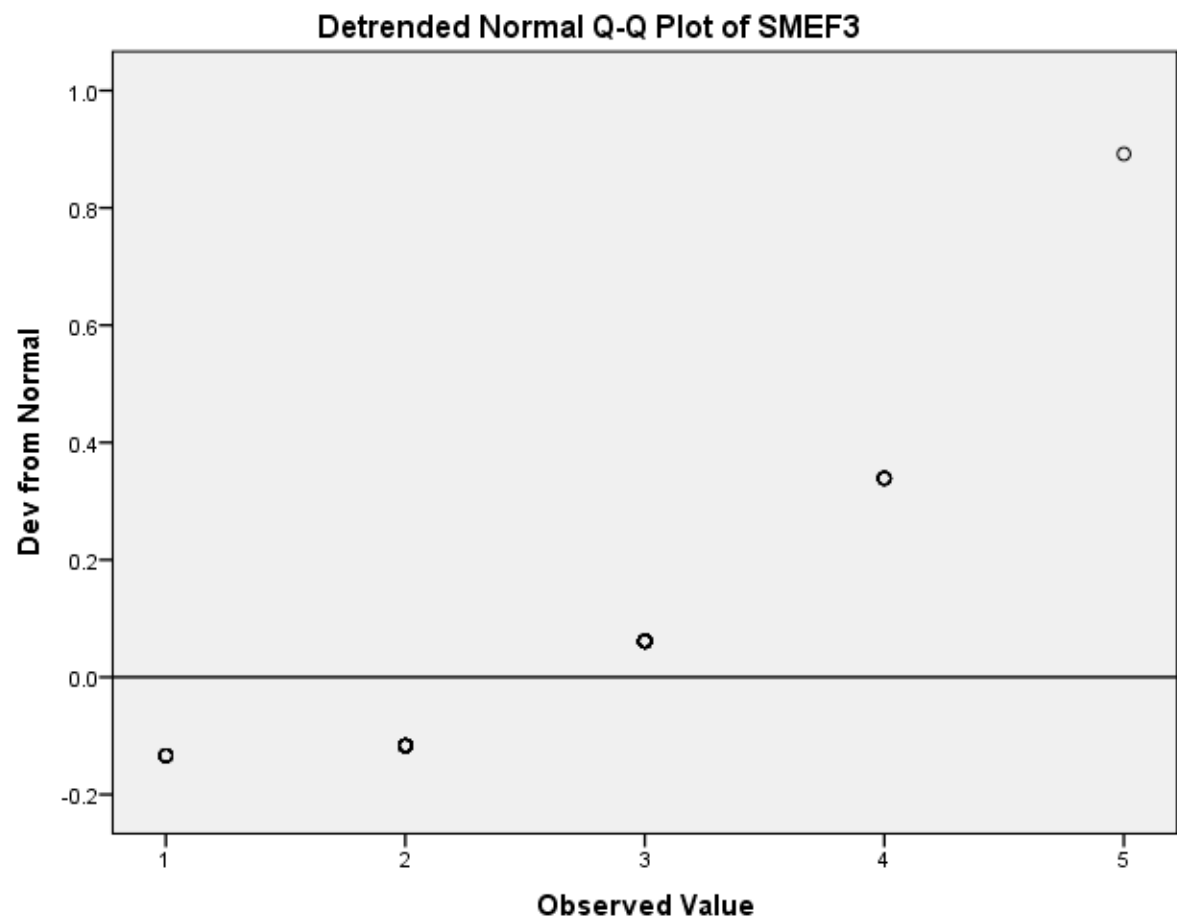

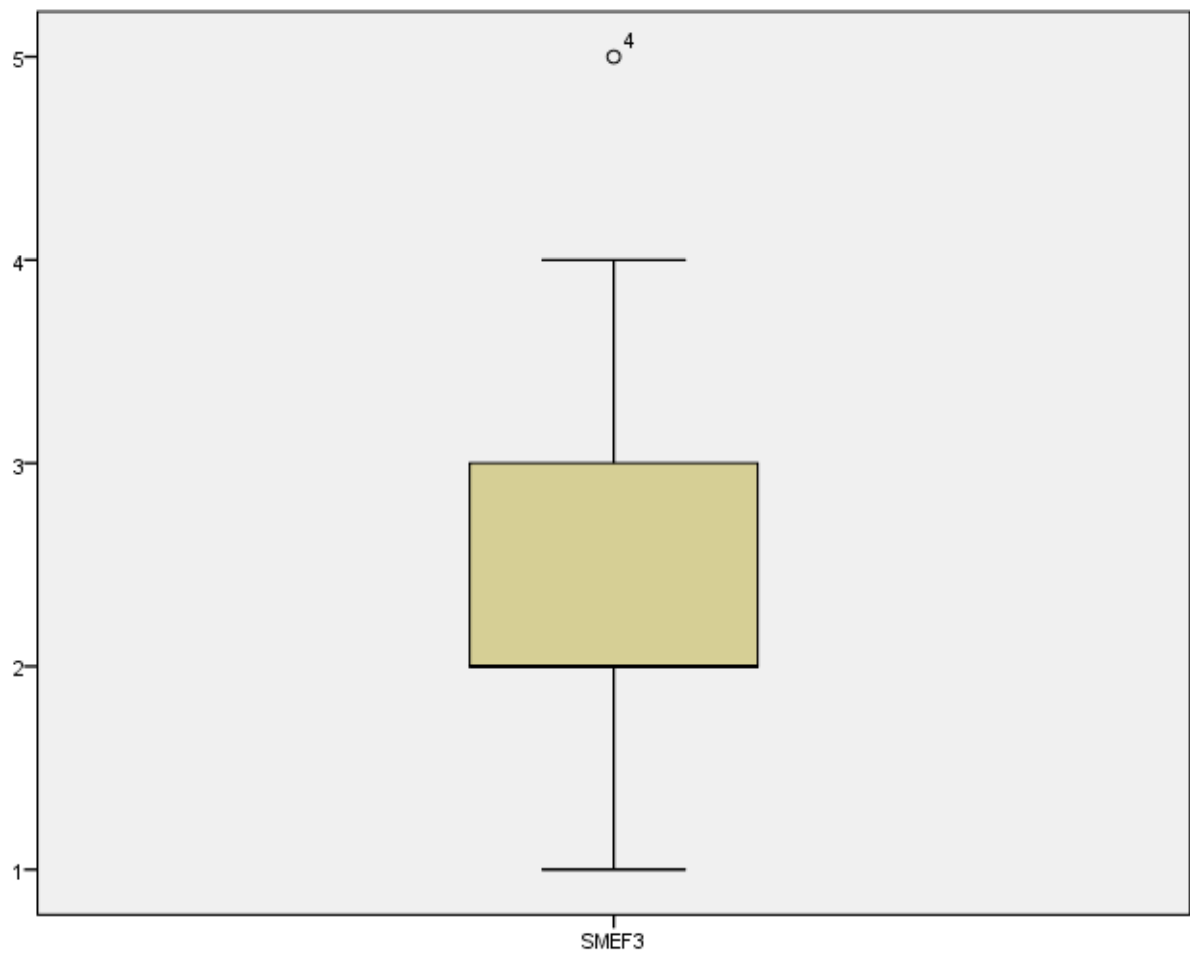

**SMEF4**



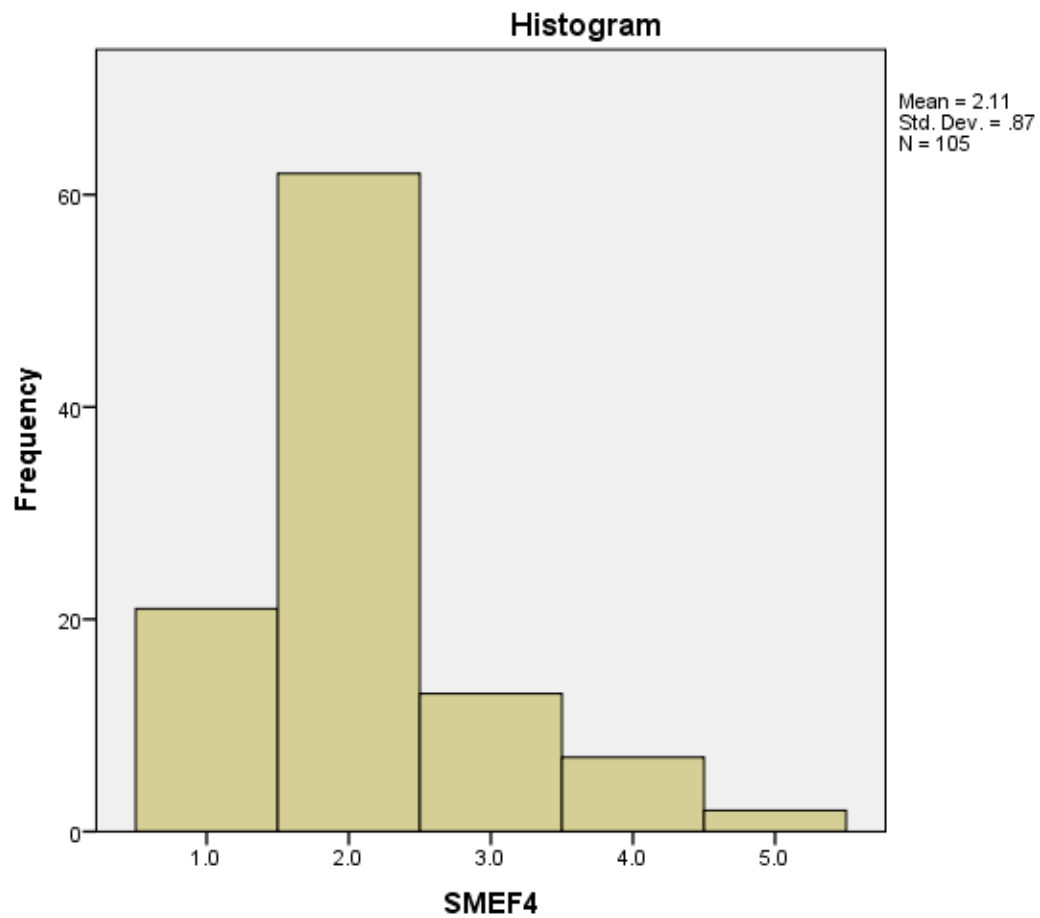

SMEF4 Stem-and-Leaf Plot

[illegible]

Normal Q-Q Plot of SMEF4

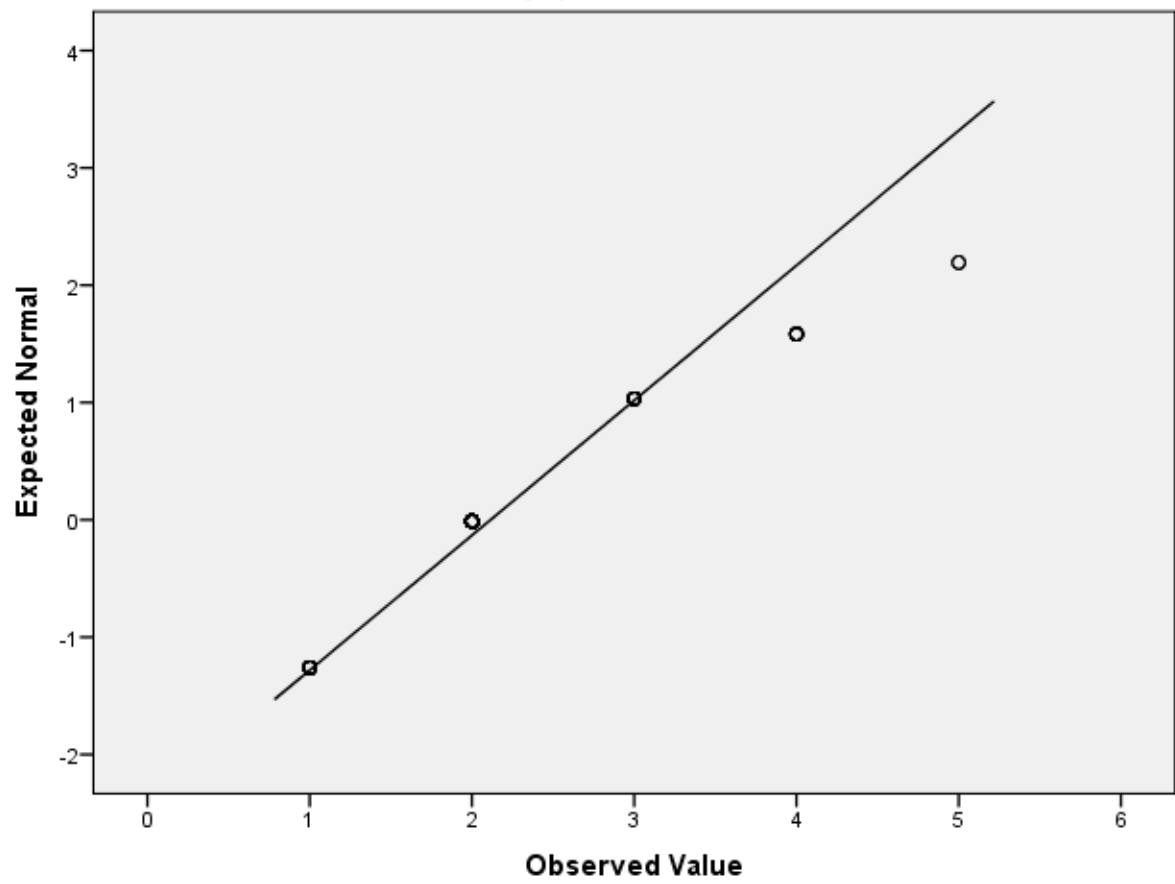

Detrended Normal Q-Q Plot of SMEF4

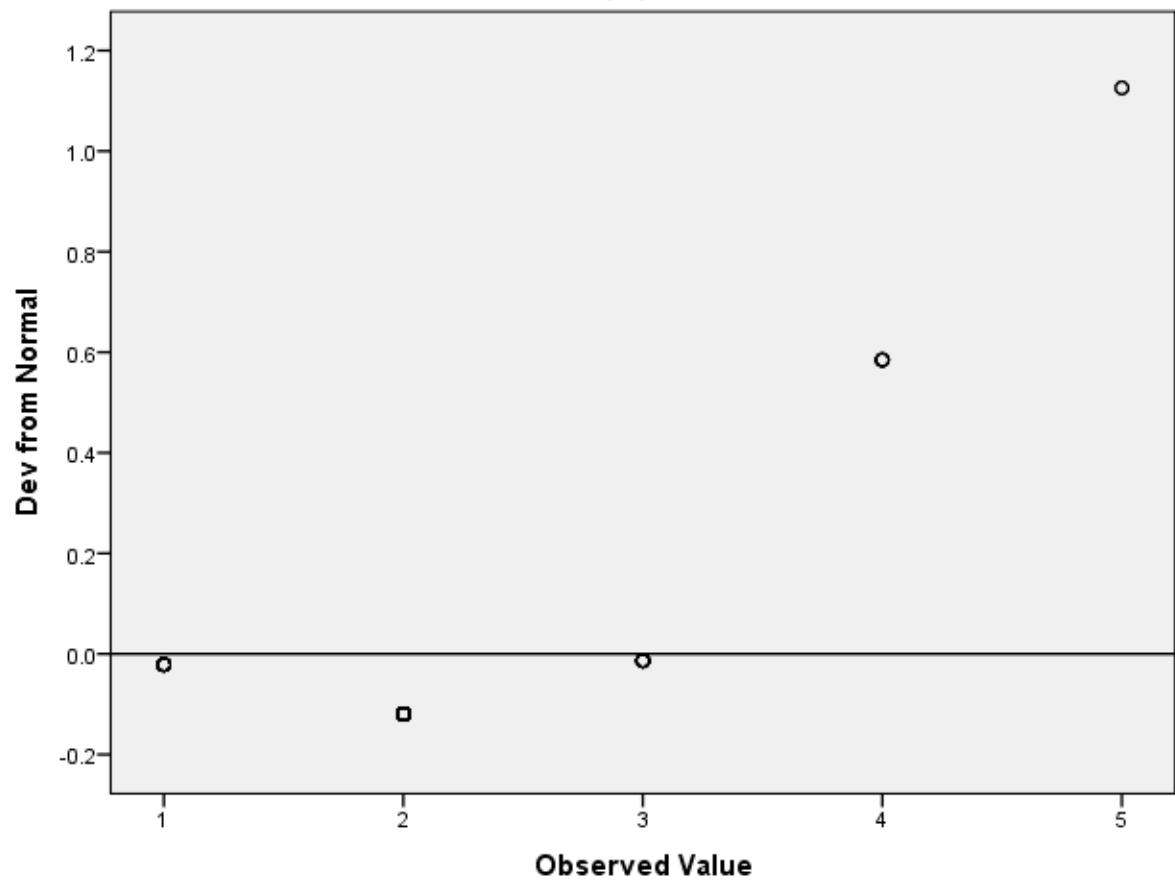

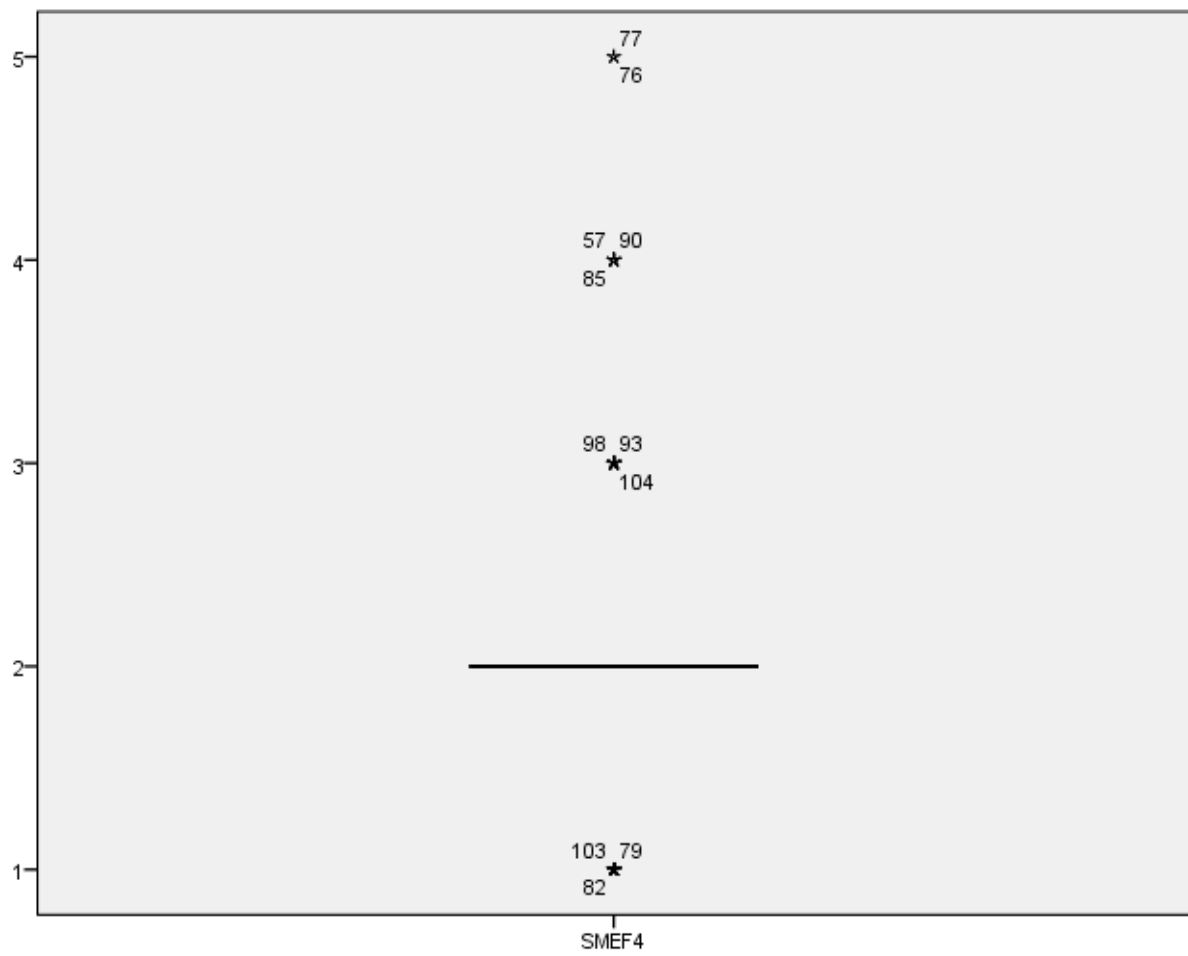

**SMEF5**

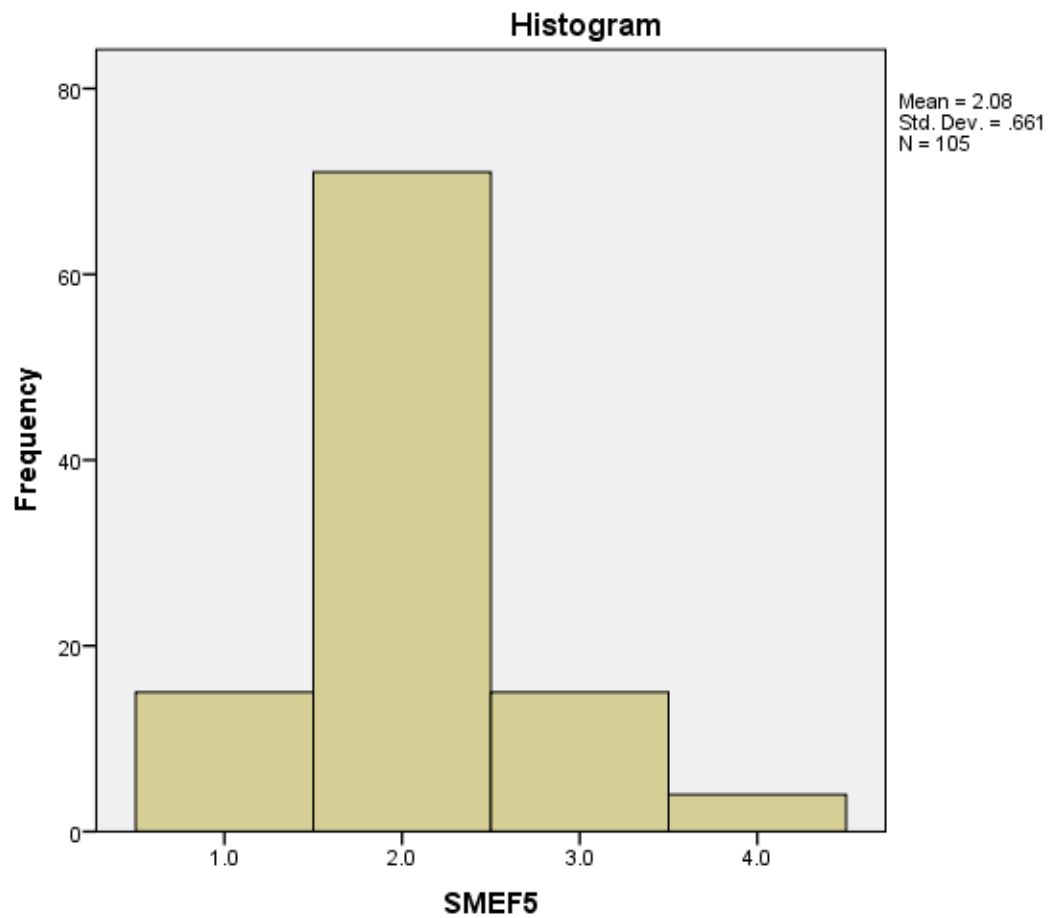

SMEF5 Stem-and-Leaf Plot

[illegible]

Normal Q-Q Plot of SMEF5

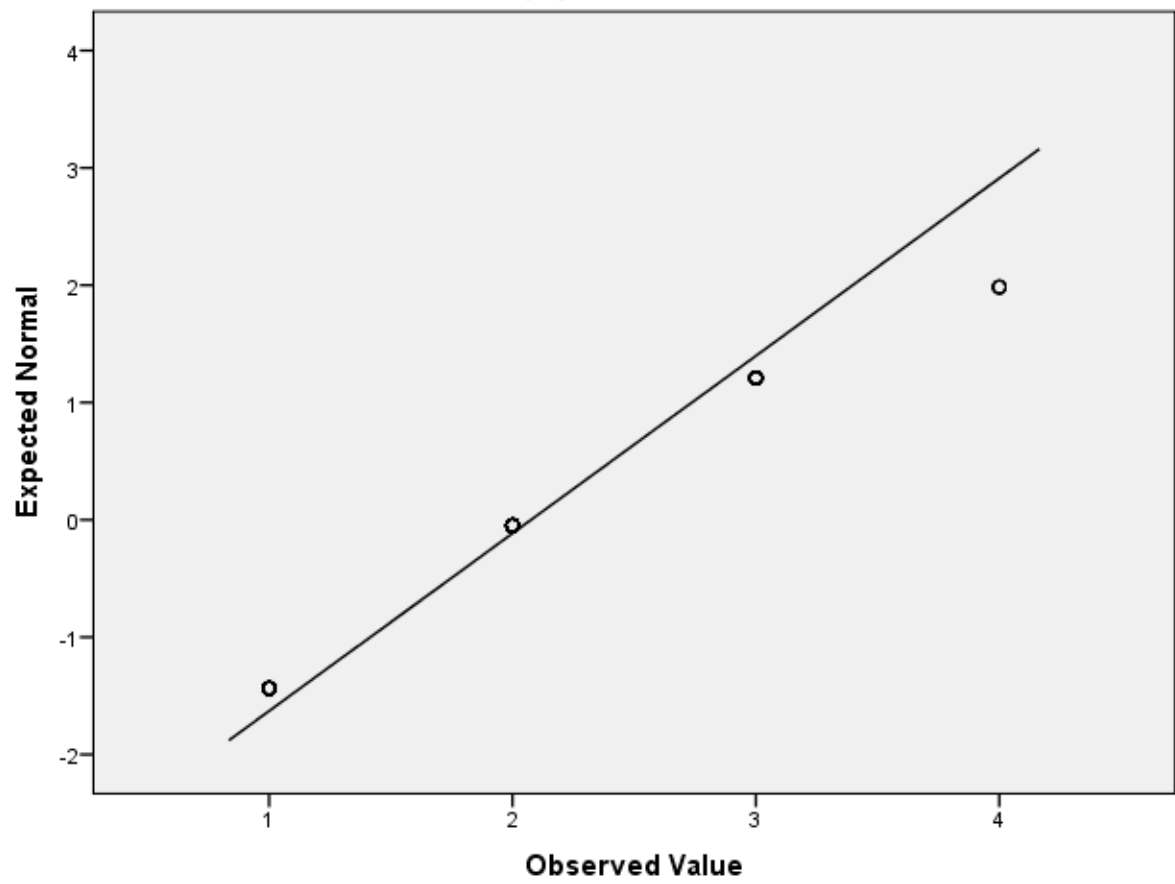

Detrended Normal Q-Q Plot of SMEF5

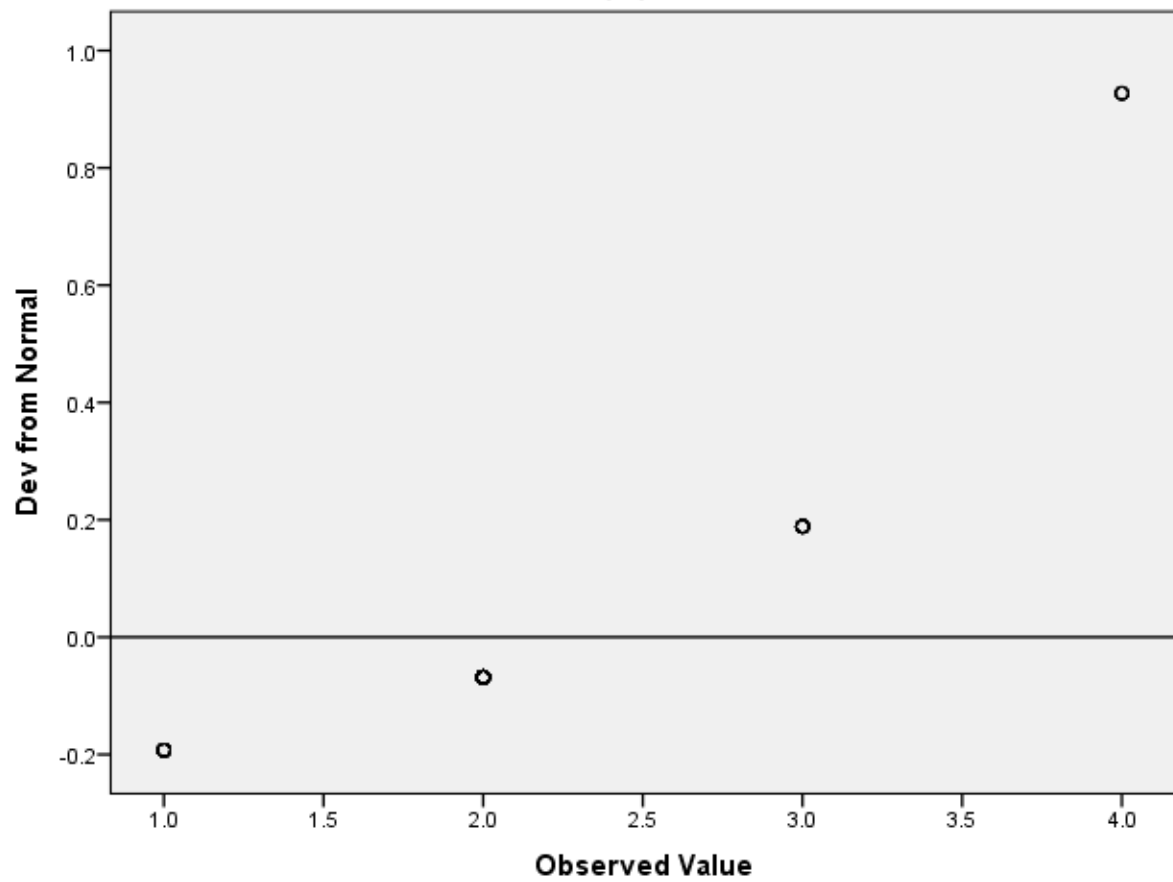

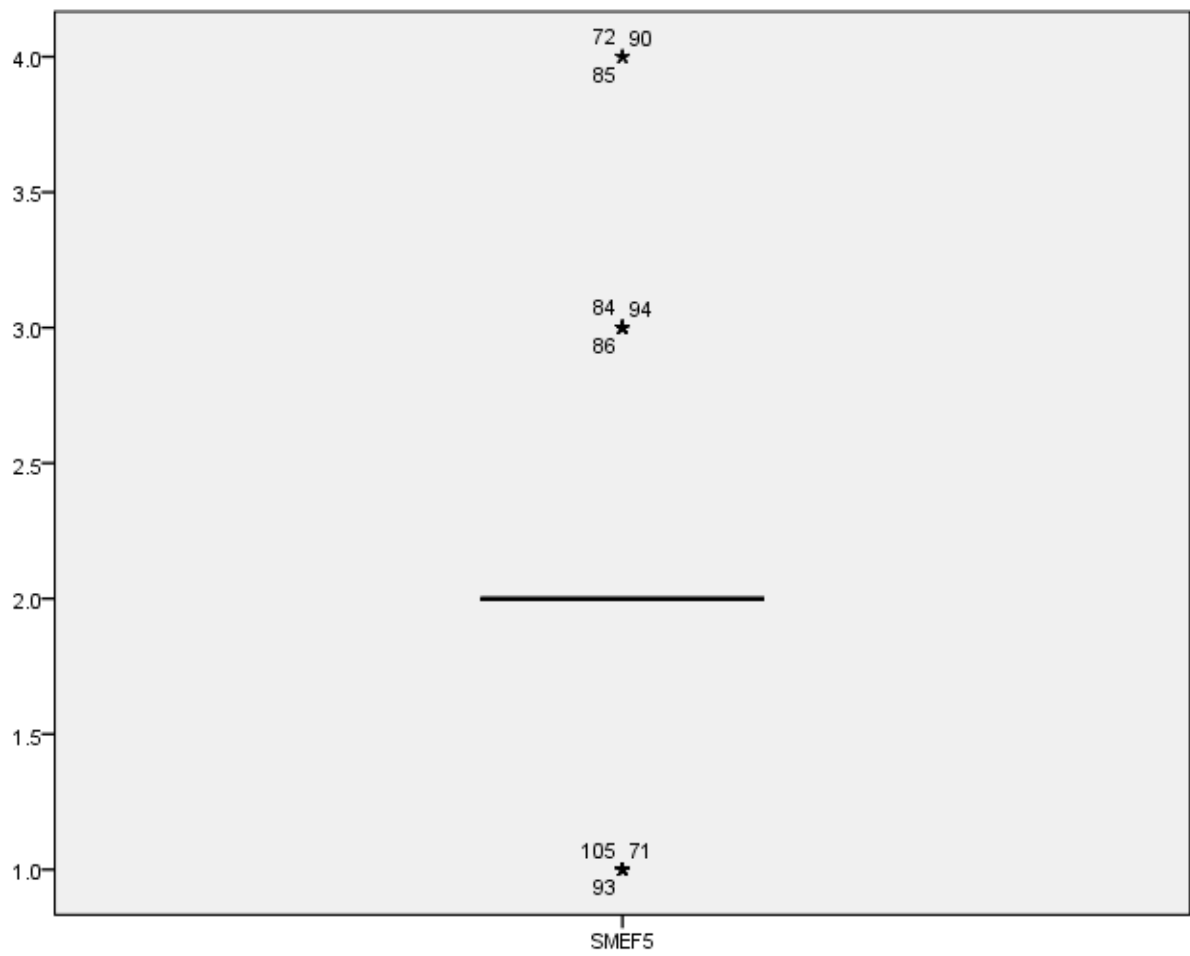

**SMEF6**



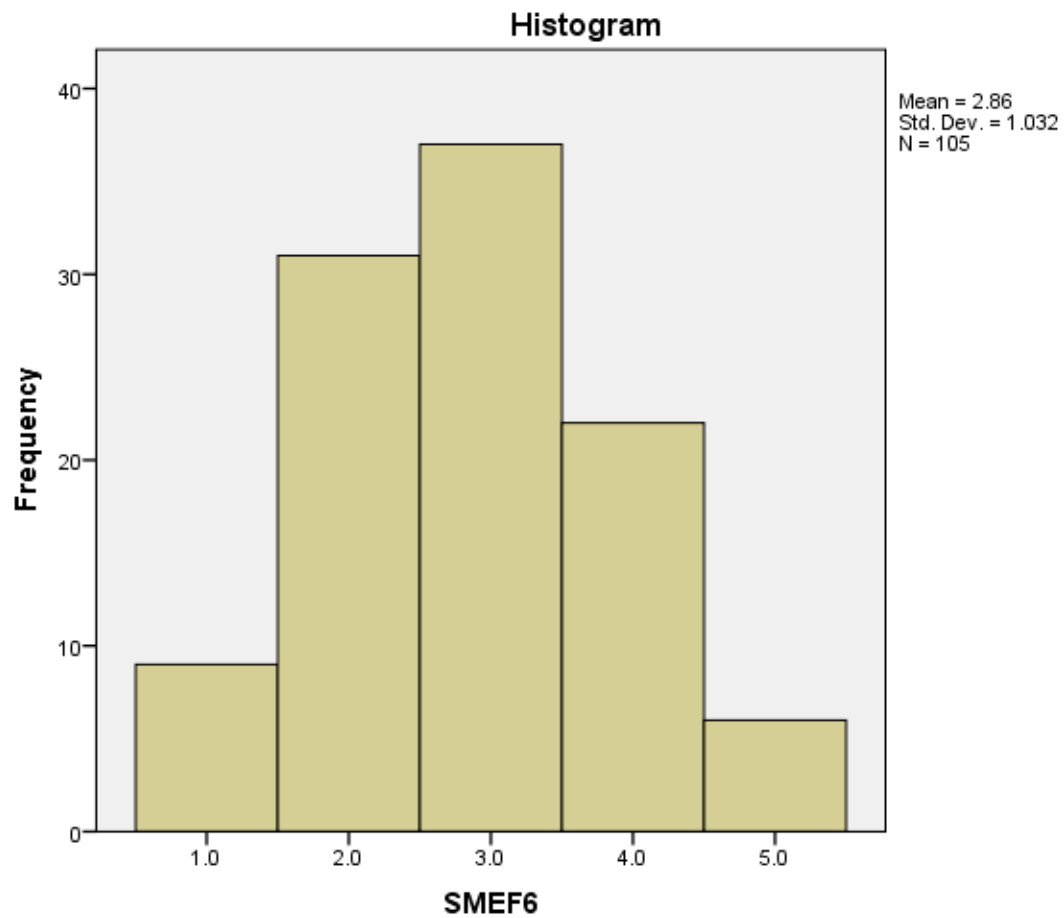

SMEF6 Stem-and-Leaf Plot

```

Frequency      Stem &   Leaf
      9.00      1 .   000000000
       .00      1 .
     31.00      2 .   00000000000000000000000000000000
       .00      2 .
     37.00      3 .   0000000000000000000000000000000000
       .00      3 .
     22.00      4 .   0000000000000000000000
       .00      4 .
      6.00      5 .   000000

Stem width:      1.0
Each leaf:      1 case(s)

```

Normal Q-Q Plot of SMEF6

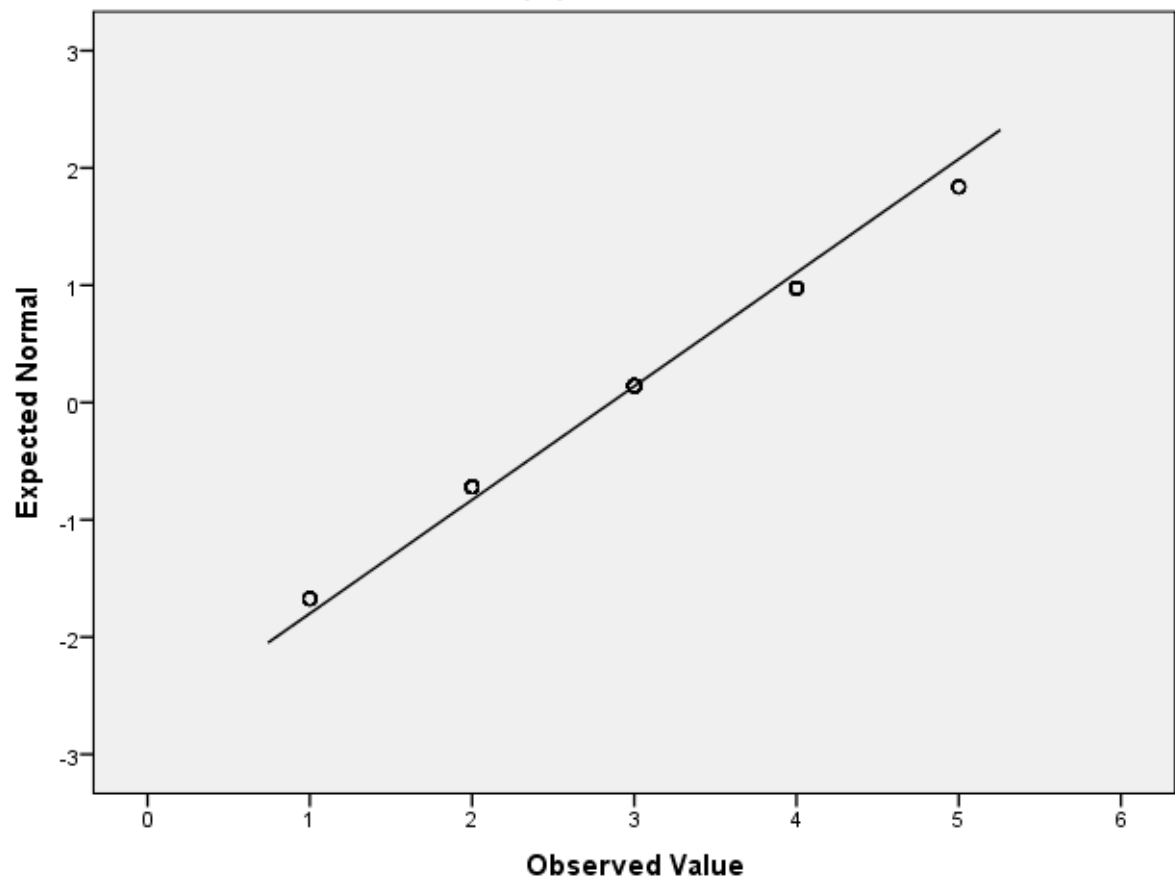

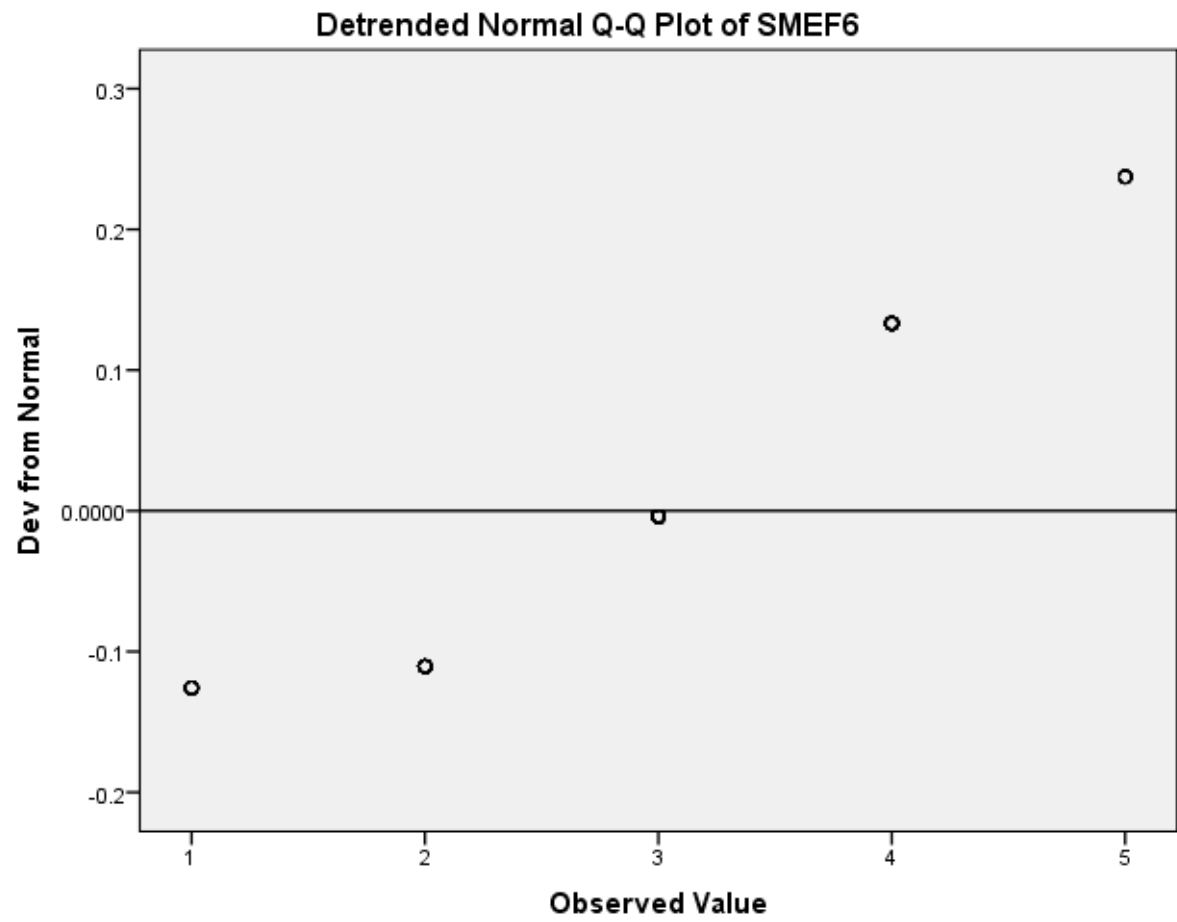

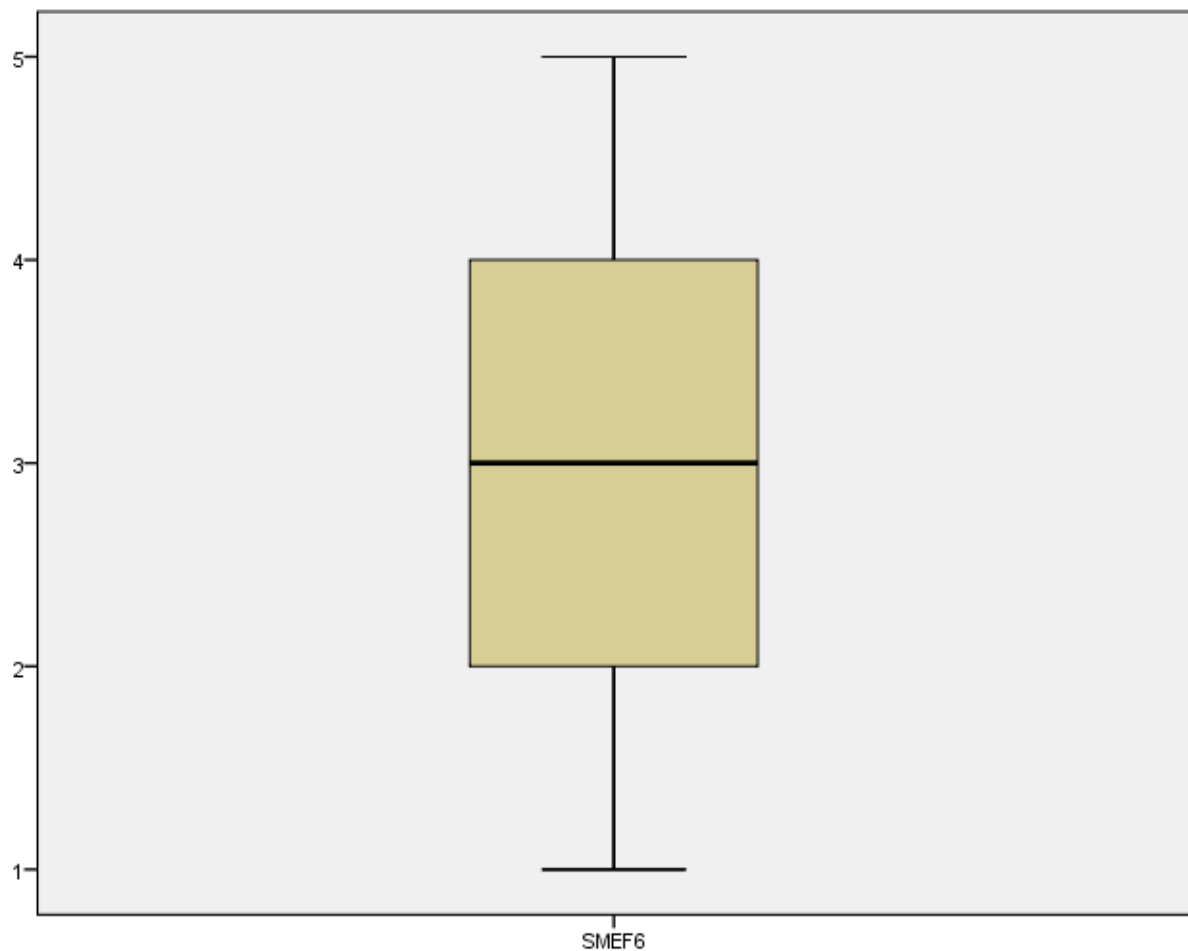

```
EXAMINE VARIABLES=SMEP1 SMEP2 SMEP3 SMEP5 SMEP6 SMEP7 SMEP8
/PLOT BOXPLOT STEMLEAF HISTOGRAM NPLOT
/COMPARE GROUPS
/STATISTICS EXTREME
/MISSING REPORT
/NOTOTAL.
```

## Explore

| Notes          |                |                                                                      |
|----------------|----------------|----------------------------------------------------------------------|
| Output Created |                | 15-SEP-2022 14:34:24                                                 |
| Comments       |                |                                                                      |
| Input          | Data           | C:\DBA\research paper,\German med paper\statistics\110 spss data.sav |
|                | Active Dataset | DataSet1                                                             |
|                | Filter         | <none>                                                               |

|                        |                                |                                                                                                                                                                                          |             |
|------------------------|--------------------------------|------------------------------------------------------------------------------------------------------------------------------------------------------------------------------------------|-------------|
|                        | Weight                         | <none>                                                                                                                                                                                   |             |
|                        | Split File                     | <none>                                                                                                                                                                                   |             |
|                        | N of Rows in Working Data File |                                                                                                                                                                                          | 110         |
| Missing Value Handling | Definition of Missing          | User-defined missing values for dependent variables are treated as missing. User-defined and system missing values for factors are treated as valid data.                                |             |
|                        | Cases Used                     | Statistics are based on cases with no missing values for any dependent variable or factor used.                                                                                          |             |
| Syntax                 |                                | EXAMINE VARIABLES=SMEP1<br>SMEP2 SMEP3 SMEP5 SMEP6<br>SMEP7 SMEP8<br>/PLOT BOXPLOT STEMLEAF<br>HISTOGRAM NPLOT<br>/COMPARE GROUPS<br>/STATISTICS EXTREME<br>/MISSING REPORT<br>/NOTOTAL. |             |
| Resources              | Processor Time                 |                                                                                                                                                                                          | 00:00:02.41 |
|                        | Elapsed Time                   |                                                                                                                                                                                          | 00:00:02.35 |

[DataSet1] C:\DBA\research paper,\German med paper\statistics\110 spss data.sav

**Case Processing Summary**

|       | Cases |         |         |         |       |         |
|-------|-------|---------|---------|---------|-------|---------|
|       | Valid |         | Missing |         | Total |         |
|       | N     | Percent | N       | Percent | N     | Percent |
| SMEP1 | 110   | 100.0%  | 0       | 0.0%    | 110   | 100.0%  |
| SMEP2 | 110   | 100.0%  | 0       | 0.0%    | 110   | 100.0%  |
| SMEP3 | 110   | 100.0%  | 0       | 0.0%    | 110   | 100.0%  |
| SMEP5 | 110   | 100.0%  | 0       | 0.0%    | 110   | 100.0%  |
| SMEP6 | 110   | 100.0%  | 0       | 0.0%    | 110   | 100.0%  |
| SMEP7 | 110   | 100.0%  | 0       | 0.0%    | 110   | 100.0%  |
| SMEP8 | 110   | 100.0%  | 0       | 0.0%    | 110   | 100.0%  |

# Extreme Values

|       |         | Case Number | Value            |
|-------|---------|-------------|------------------|
| SMEP1 |         | 1           | 76               |
|       |         | 2           | 77               |
|       | Highest | 3           | 13               |
|       |         | 4           | 44               |
|       |         | 5           | 85               |
|       |         |             | 4.0 <sup>a</sup> |
|       |         | 1           | 110              |
|       |         | 2           | 103              |
|       | Lowest  | 3           | 101              |
|       |         | 4           | 100              |
| SMEP2 |         | 5           | 96               |
|       |         |             | 1.0 <sup>b</sup> |
|       |         | 1           | 76               |
|       |         | 2           | 77               |
|       | Highest | 3           | 57               |
|       |         | 4           | 85               |
|       |         | 5           | 99               |
|       |         |             | 4.0              |
|       |         | 1           | 110              |
|       |         | 2           | 96               |
| SMEP3 |         |             | 1.0              |
|       | Lowest  | 3           | 83               |
|       |         | 4           | 81               |
|       |         |             | 1.0              |
|       |         | 5           | 79               |
|       |         |             | 1.0 <sup>b</sup> |
|       |         | 1           | 12               |
|       |         | 2           | 28               |
|       | Highest | 3           | 57               |
|       |         | 4           | 75               |
| SMEP5 |         | 5           | 76               |
|       |         |             | 5.0 <sup>c</sup> |
|       |         | 1           | 13               |
|       |         | 2           | 8                |
|       | Lowest  | 3           | 5                |
|       |         |             | 1.0              |
|       |         | 4           | 110              |
|       |         |             | 2.0              |
|       |         | 5           | 104              |
|       |         |             | 2.0 <sup>d</sup> |
| SMEP5 |         | 1           | 76               |
|       |         | 2           | 77               |
|       | Highest | 3           | 87               |
|       |         | 4           | 90               |
|       |         |             | 4.0              |
|       |         | 5           | 30               |
|       |         |             | 3.0 <sup>e</sup> |
|       |         | 1           | 110              |
|       |         | 2           | 94               |
|       | Lowest  | 3           | 85               |
|       |         | 4           | 82               |
|       |         |             | 1.0              |
|       |         | 5           | 81               |
|       |         |             | 1.0 <sup>b</sup> |

|       |         |   |     |                  |
|-------|---------|---|-----|------------------|
| SMEP6 | Highest | 1 | 21  | 4.0              |
|       |         | 2 | 26  | 4.0              |
|       |         | 3 | 43  | 4.0              |
|       |         | 4 | 55  | 4.0              |
|       |         | 5 | 57  | 4.0 <sup>a</sup> |
|       | Lowest  | 1 | 110 | 1.0              |
|       |         | 2 | 93  | 1.0              |
|       |         | 3 | 72  | 1.0              |
|       |         | 4 | 62  | 1.0              |
|       |         | 5 | 56  | 1.0 <sup>b</sup> |
| SMEP7 | Highest | 1 | 76  | 5.0              |
|       |         | 2 | 77  | 5.0              |
|       |         | 3 | 21  | 4.0              |
|       |         | 4 | 41  | 4.0              |
|       |         | 5 | 58  | 4.0 <sup>a</sup> |
|       | Lowest  | 1 | 83  | 1.0              |
|       |         | 2 | 75  | 1.0              |
|       |         | 3 | 71  | 1.0              |
|       |         | 4 | 42  | 1.0              |
|       |         | 5 | 39  | 1.0 <sup>b</sup> |
| SMEP8 | Highest | 1 | 18  | 5.0              |
|       |         | 2 | 22  | 5.0              |
|       |         | 3 | 39  | 5.0              |
|       |         | 4 | 42  | 5.0              |
|       |         | 5 | 45  | 5.0 <sup>c</sup> |
|       | Lowest  | 1 | 110 | 1.0              |
|       |         | 2 | 96  | 1.0              |
|       |         | 3 | 90  | 1.0              |
|       |         | 4 | 89  | 1.0              |
|       |         | 5 | 85  | 1.0 <sup>b</sup> |

a. Only a partial list of cases with the value 4.0 are shown in the table of upper extremes.

b. Only a partial list of cases with the value 1.0 are shown in the table of lower extremes.

c. Only a partial list of cases with the value 5.0 are shown in the table of upper extremes.

d. Only a partial list of cases with the value 2.0 are shown in the table of lower extremes.

e. Only a partial list of cases with the value 3.0 are shown in the table of upper extremes.

| Tests of Normality |                                 |     |      |              |     |      |
|--------------------|---------------------------------|-----|------|--------------|-----|------|
|                    | Kolmogorov-Smirnov <sup>a</sup> |     |      | Shapiro-Wilk |     |      |
|                    | Statistic                       | df  | Sig. | Statistic    | df  | Sig. |
| SMEP1              | .283                            | 110 | .000 | .727         | 110 | .000 |
| SMEP2              | .338                            | 110 | .000 | .776         | 110 | .000 |
| SMEP3              | .225                            | 110 | .000 | .873         | 110 | .000 |
| SMEP5              | .283                            | 110 | .000 | .801         | 110 | .000 |
| SMEP6              | .250                            | 110 | .000 | .858         | 110 | .000 |
| SMEP7              | .309                            | 110 | .000 | .844         | 110 | .000 |
| SMEP8              | .252                            | 110 | .000 | .875         | 110 | .000 |

a. Lilliefors Significance Correction

## SMEP1

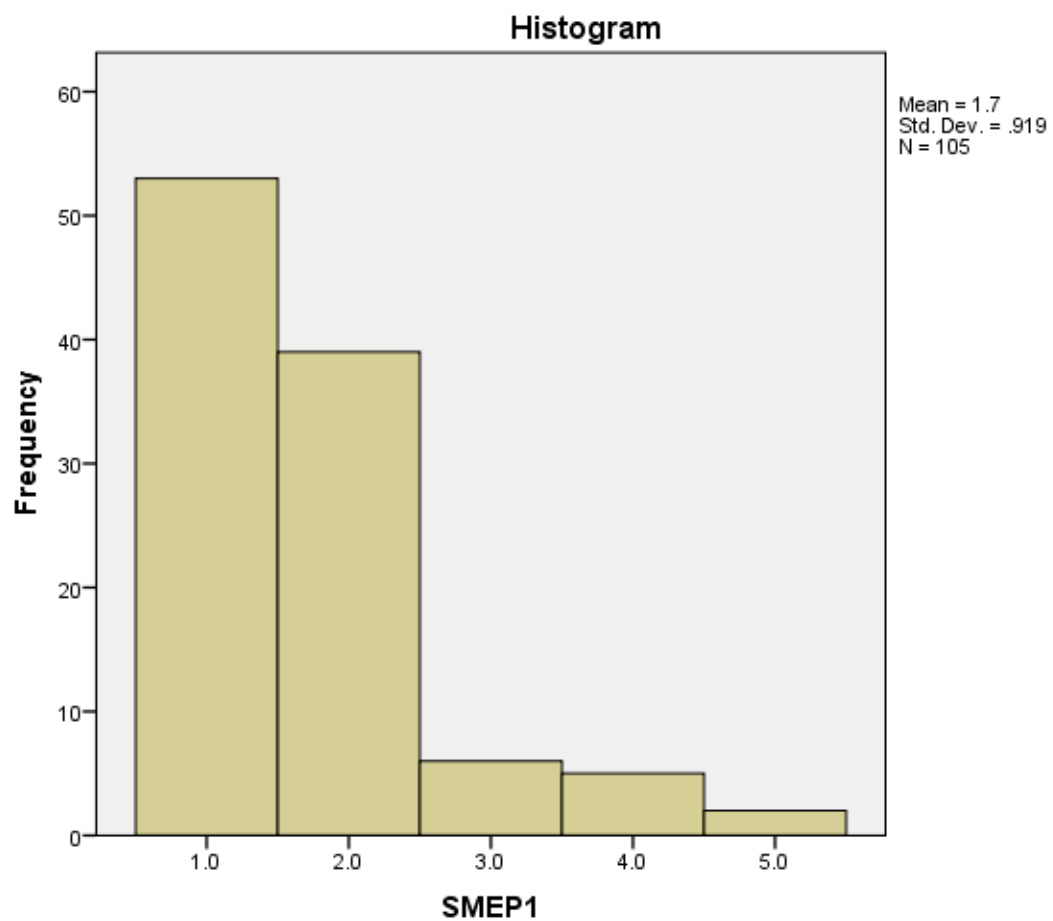



## SMEP1 Stem-and-Leaf Plot

[illegible]

```
Stem width:      1.0
Each leaf:       1 case(s)
```

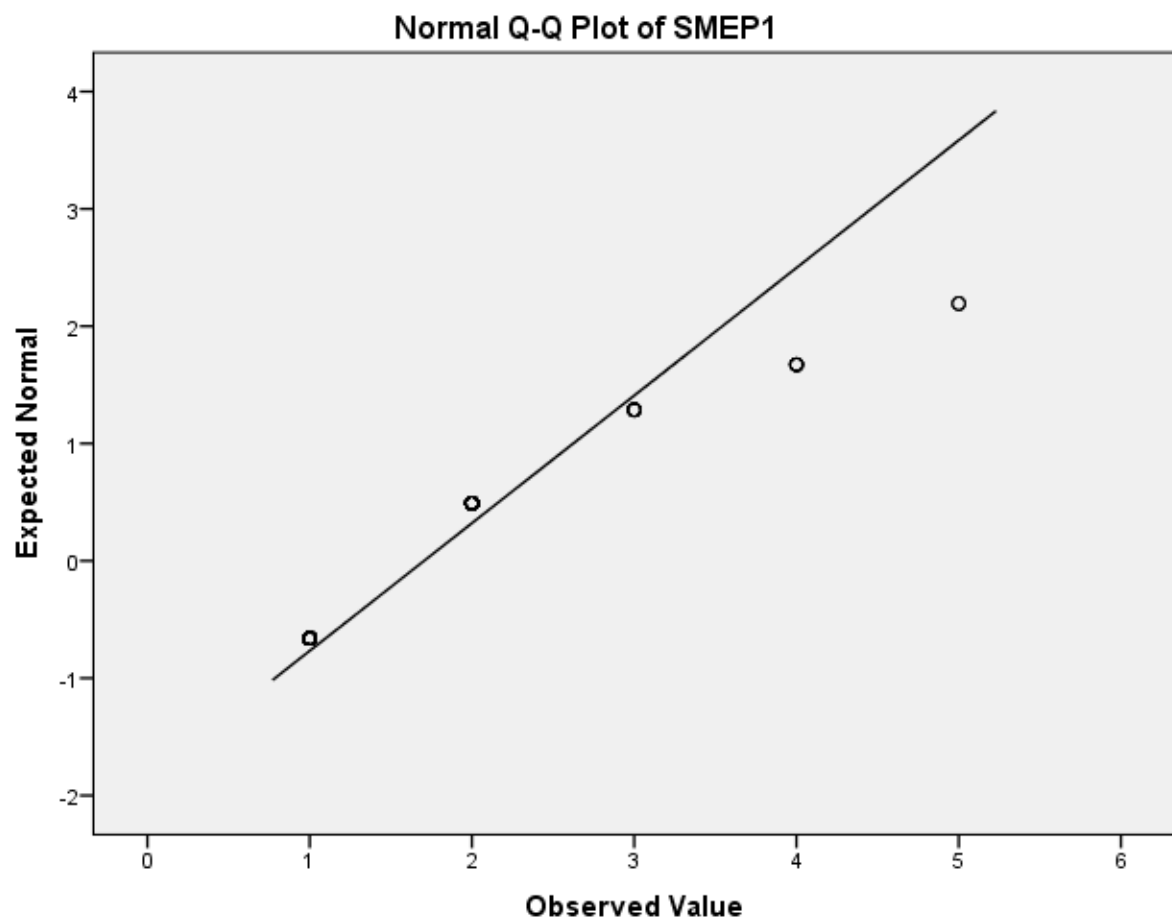

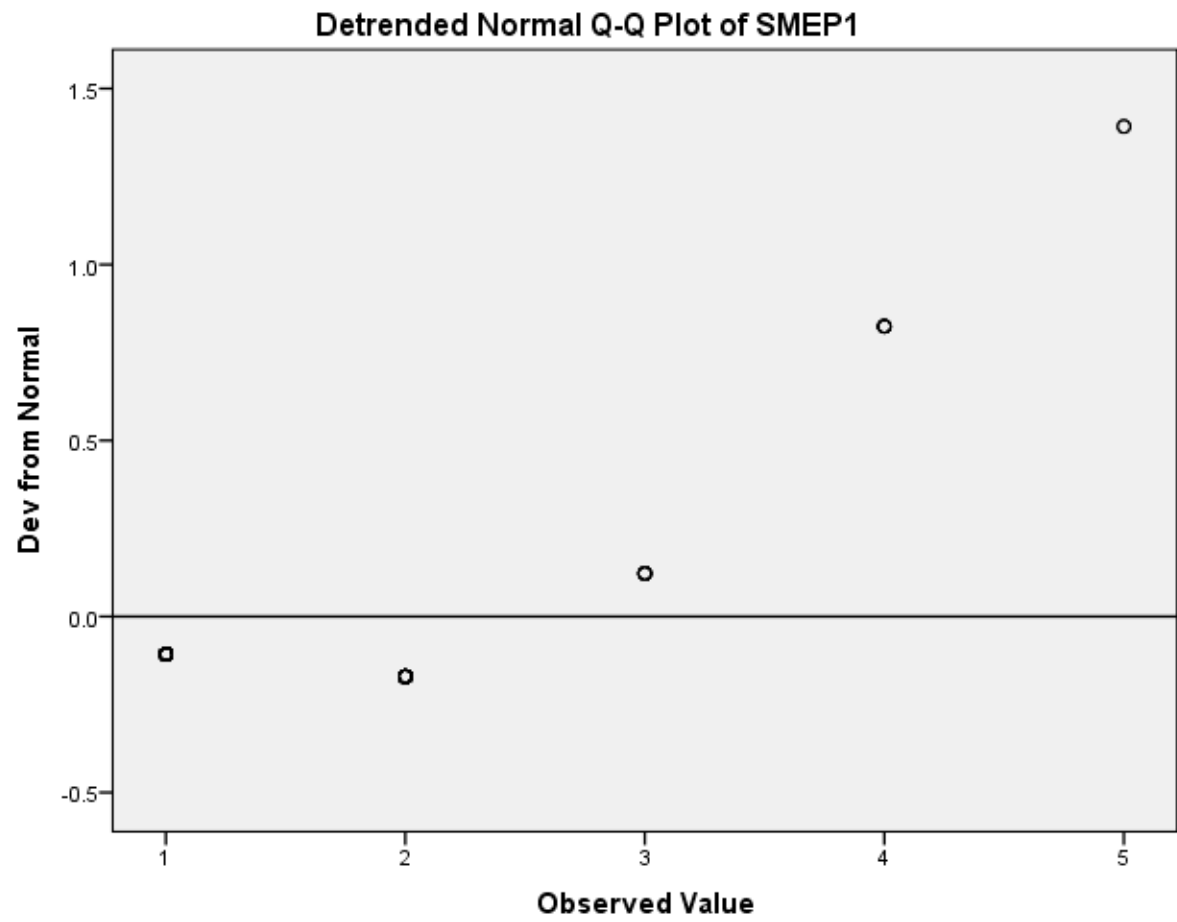

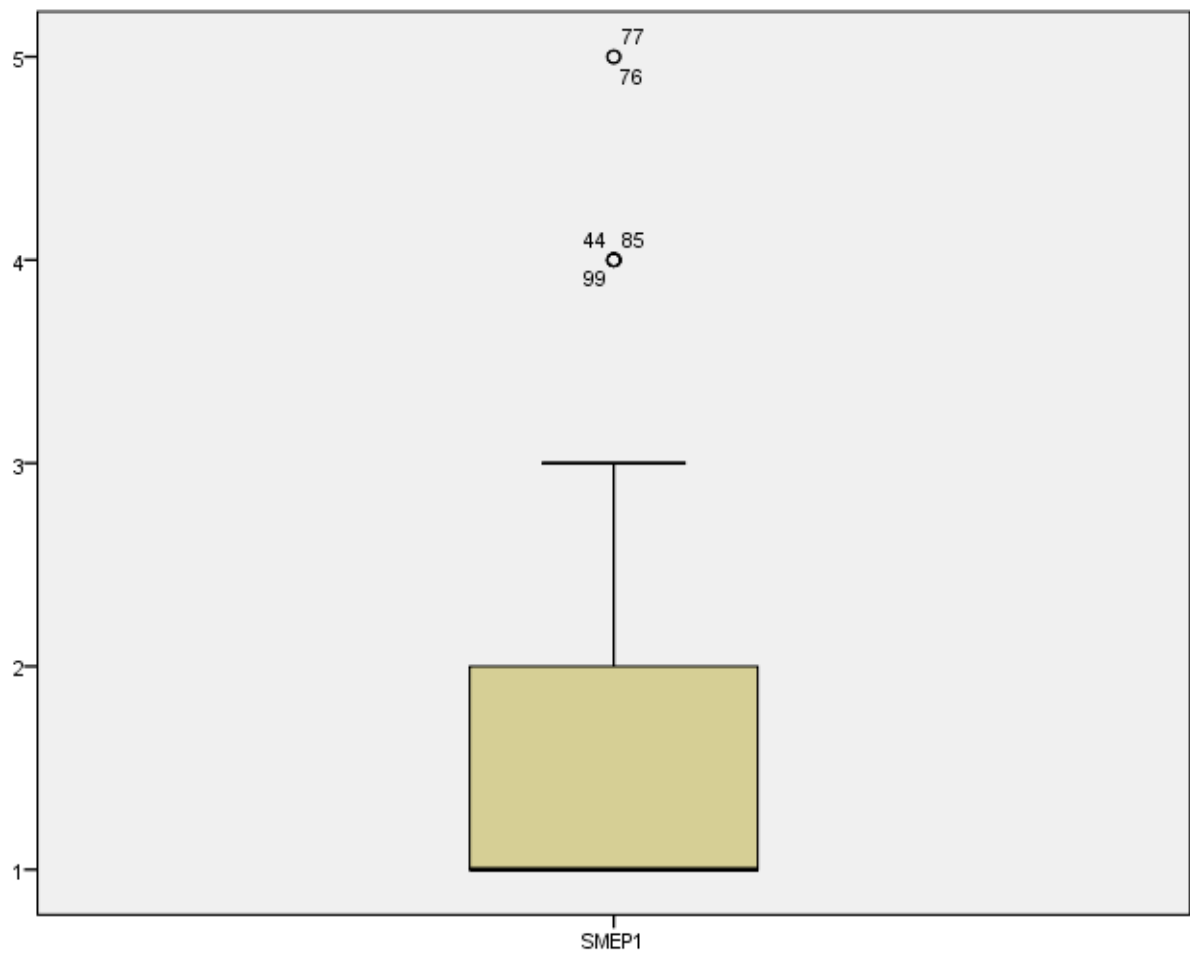

**SMEP2**

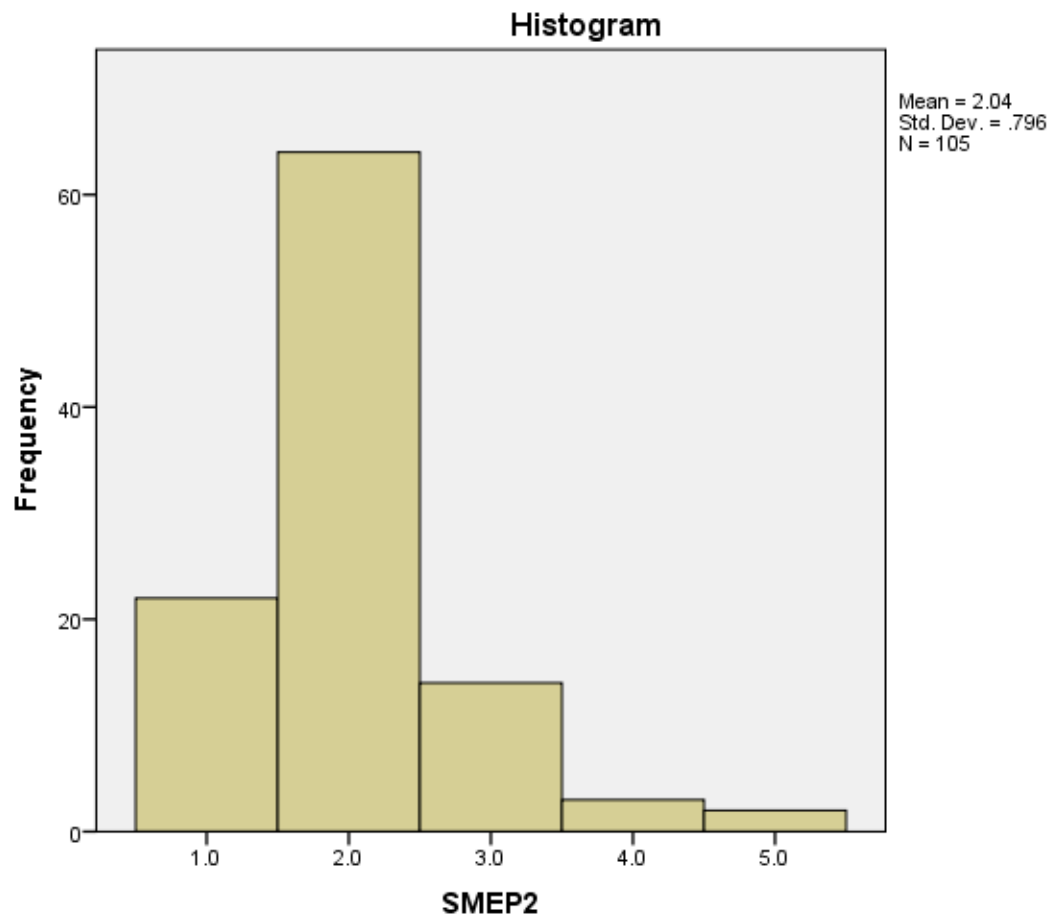

SMEP2 Stem-and-Leaf Plot

[illegible]

Normal Q-Q Plot of SMEP2

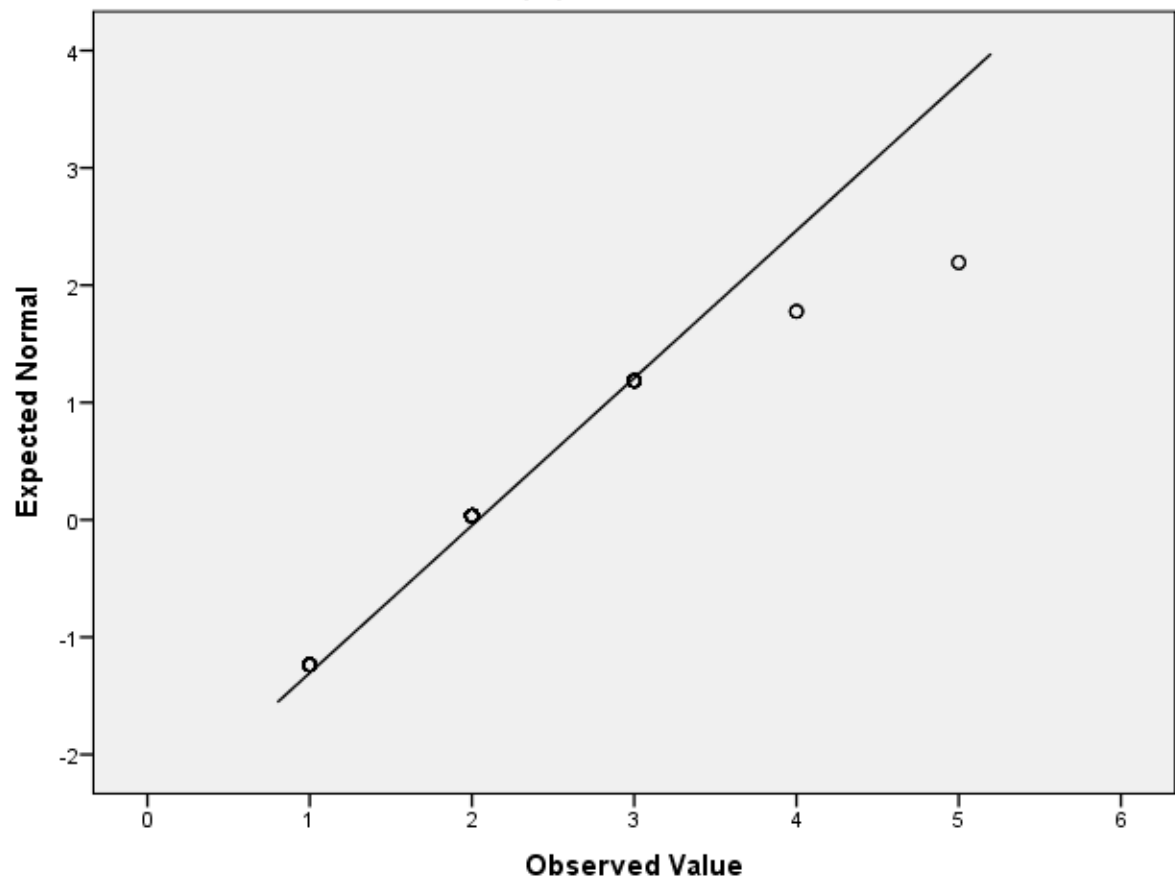

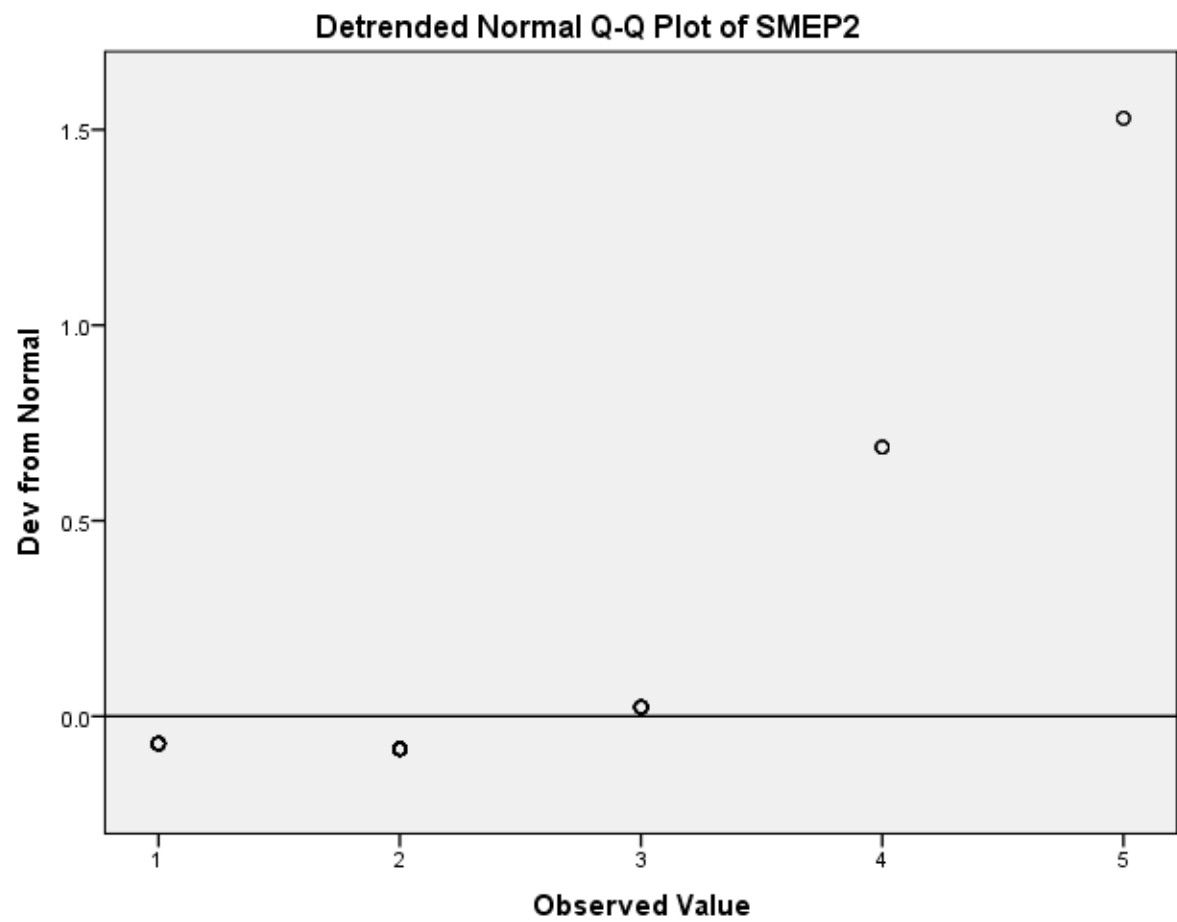

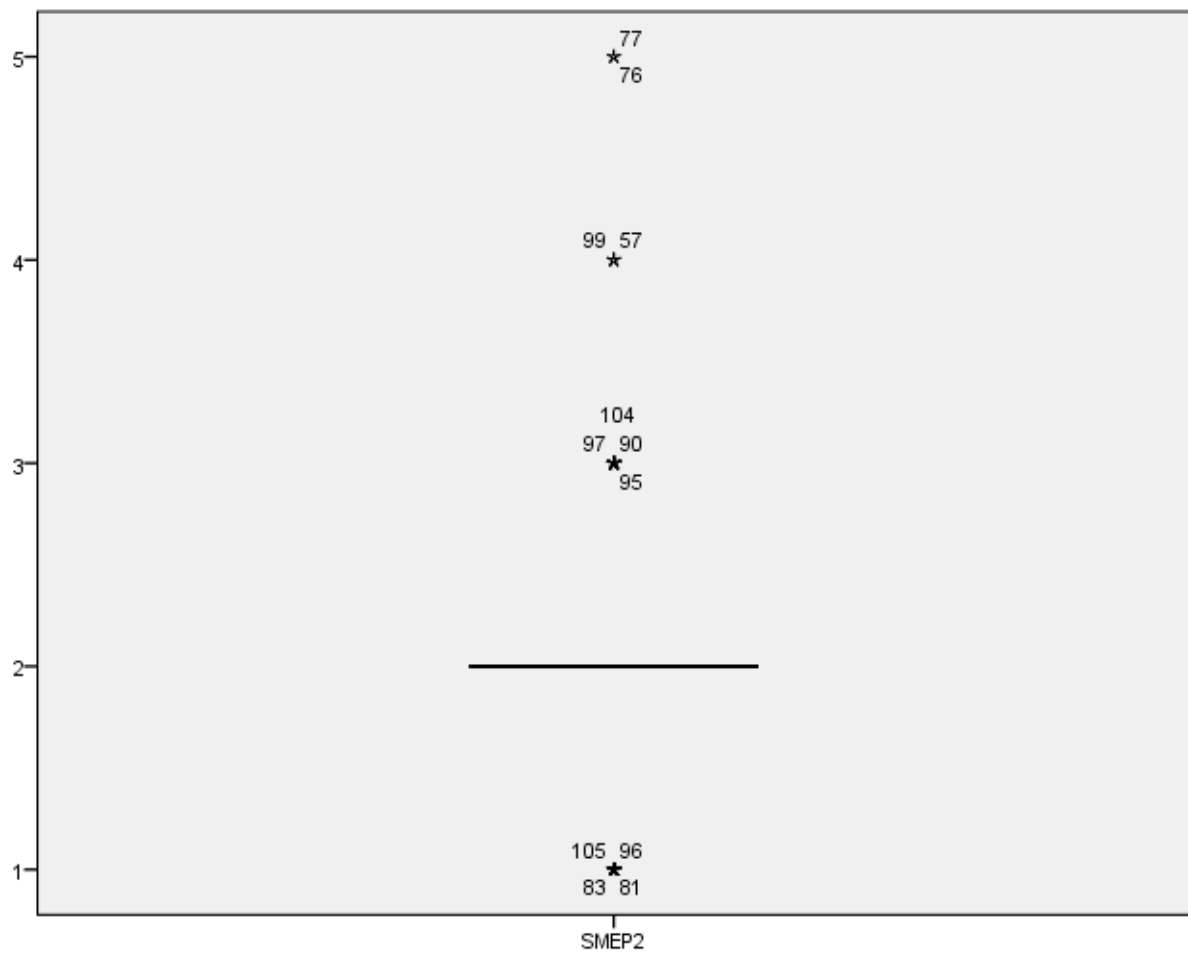

**SMEP3**

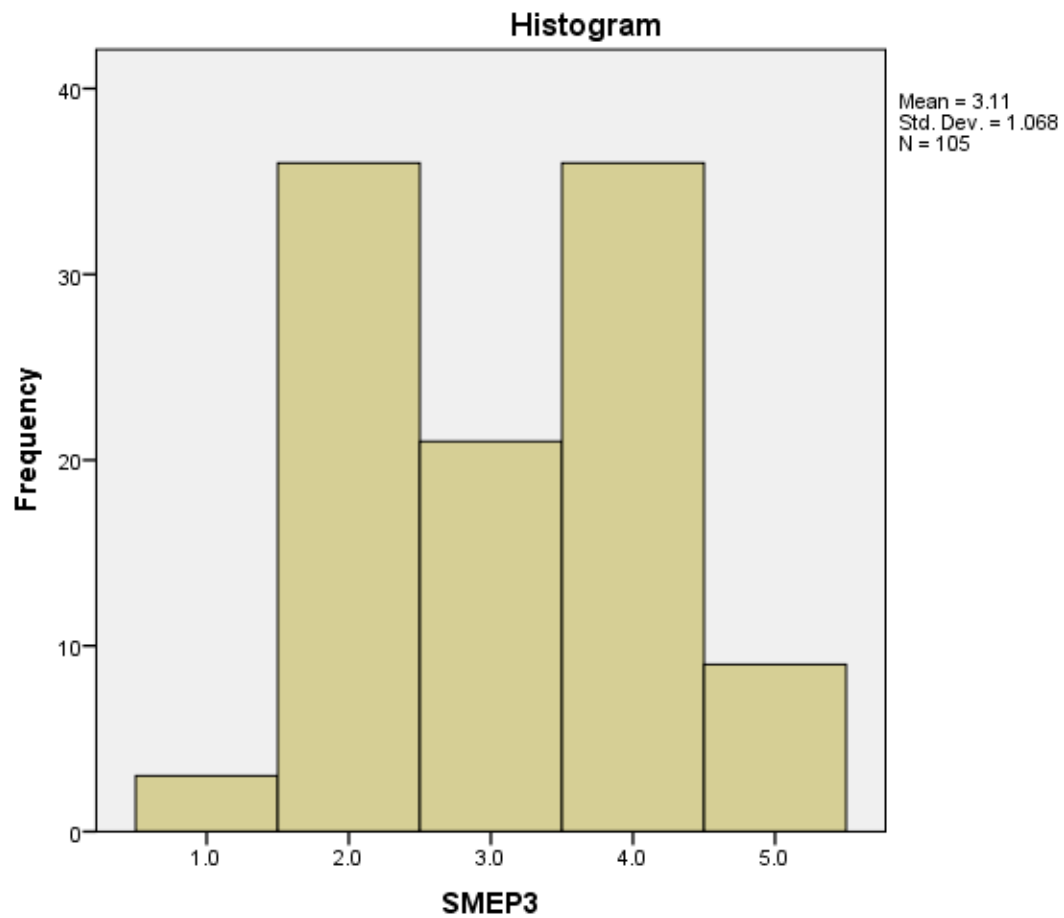

SMEP3 Stem-and-Leaf Plot

```
Frequency      Stem & Leaf  

    3.00       1 .  000  

     .00       1 .  

   36.00       2 .  000000000000000000000000000000000000  

     .00       2 .  

   21.00       3 .  00000000000000000000  

     .00       3 .  

   36.00       4 .  000000000000000000000000000000000000  

     .00       4 .  

     9.00       5 .  000000000  
  
Stem width:        1.0  
Each leaf:        1 case(s)
```



Normal Q-Q Plot of SMEP3

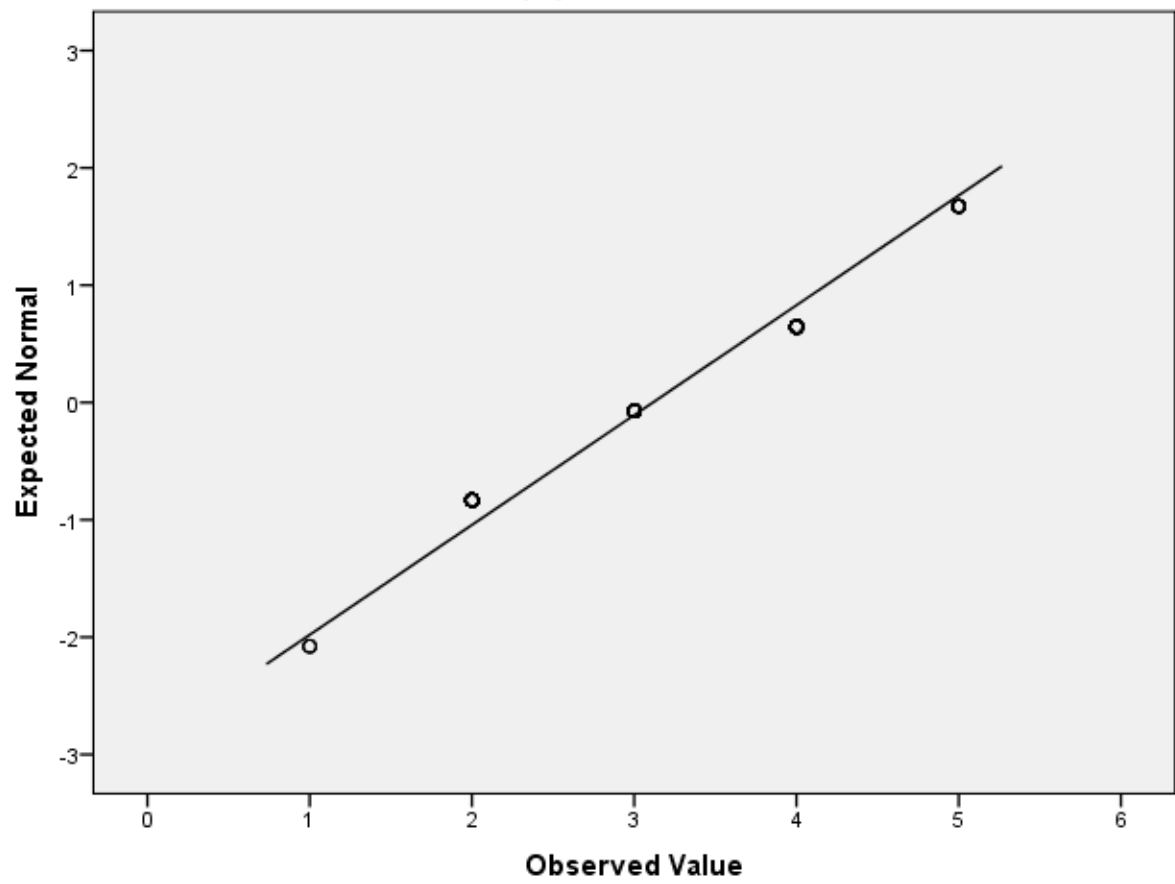

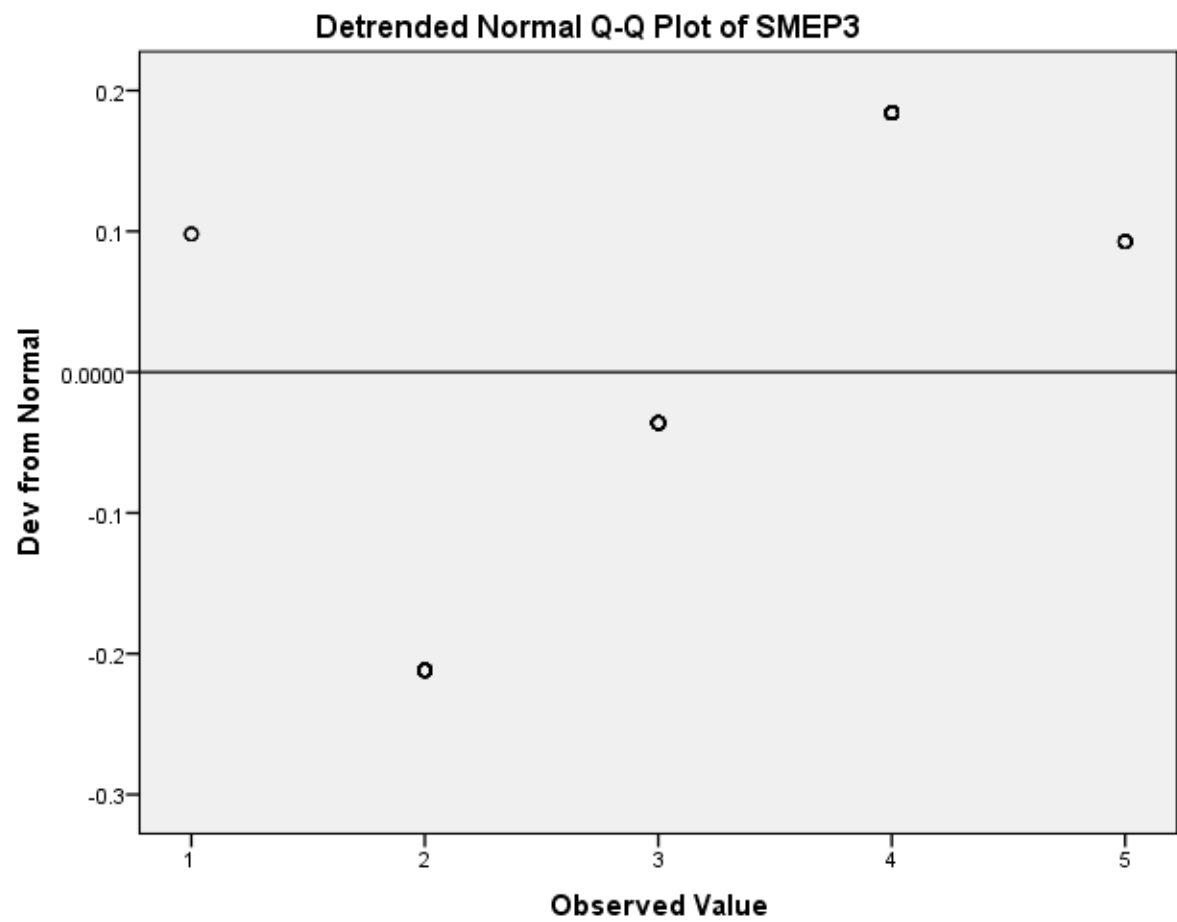

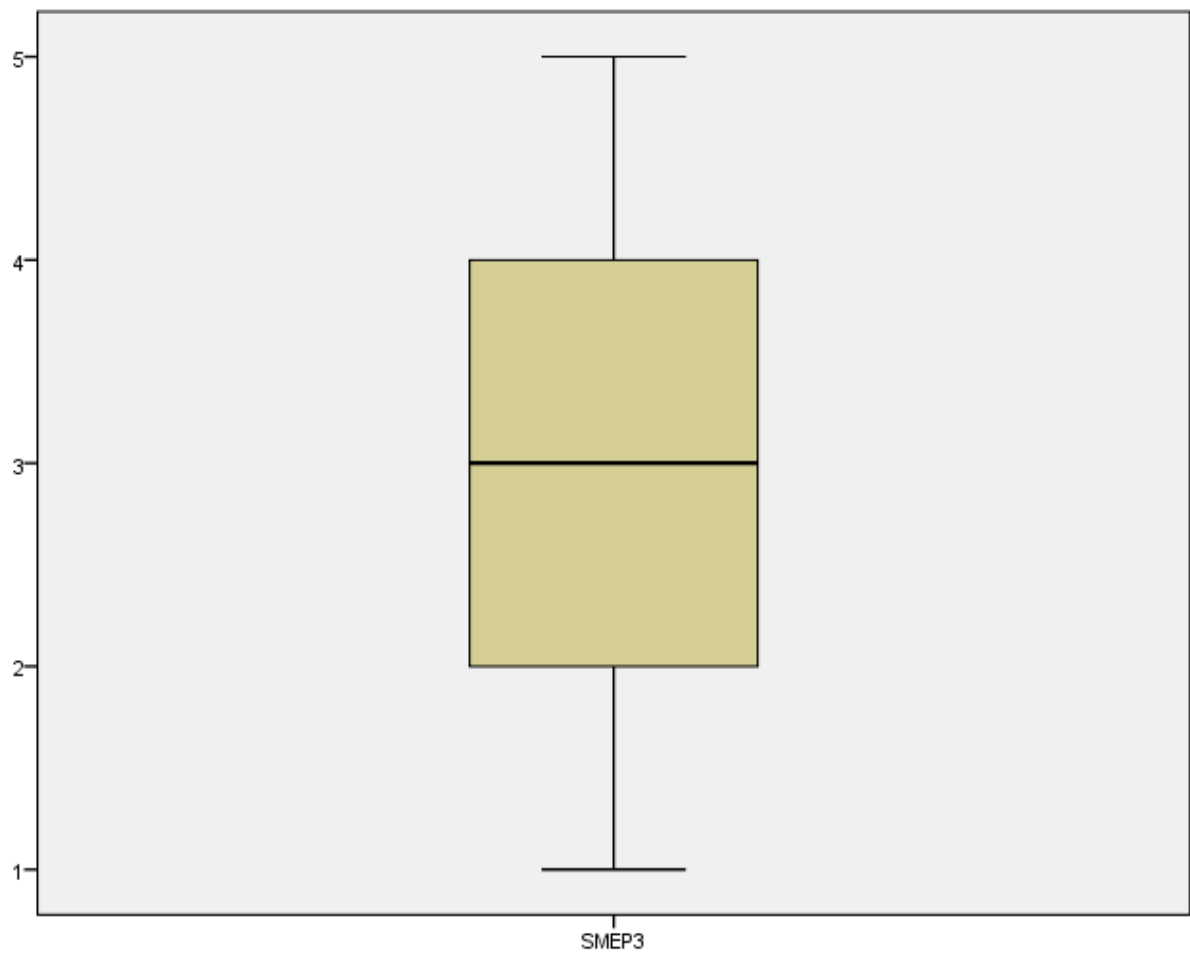

**SMEP5**

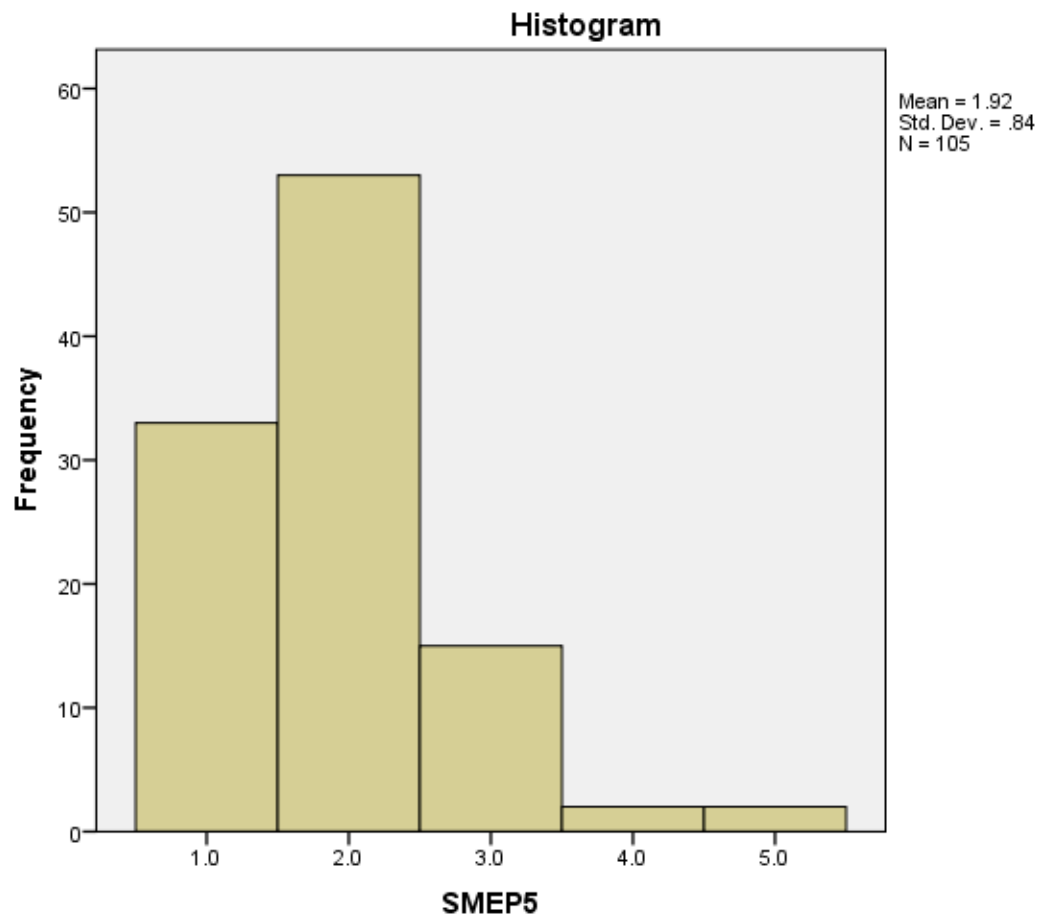

SMEP5 Stem-and-Leaf Plot

[illegible]

Normal Q-Q Plot of SMEP5

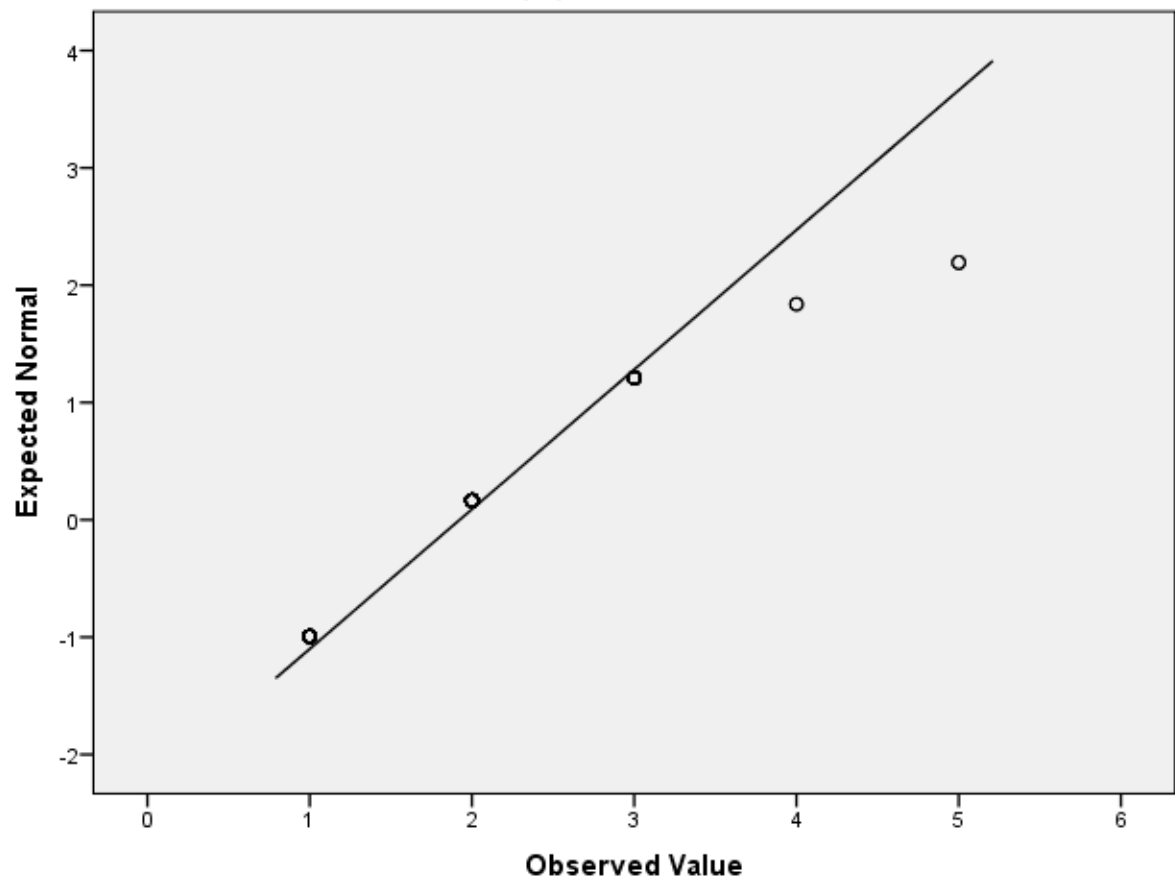

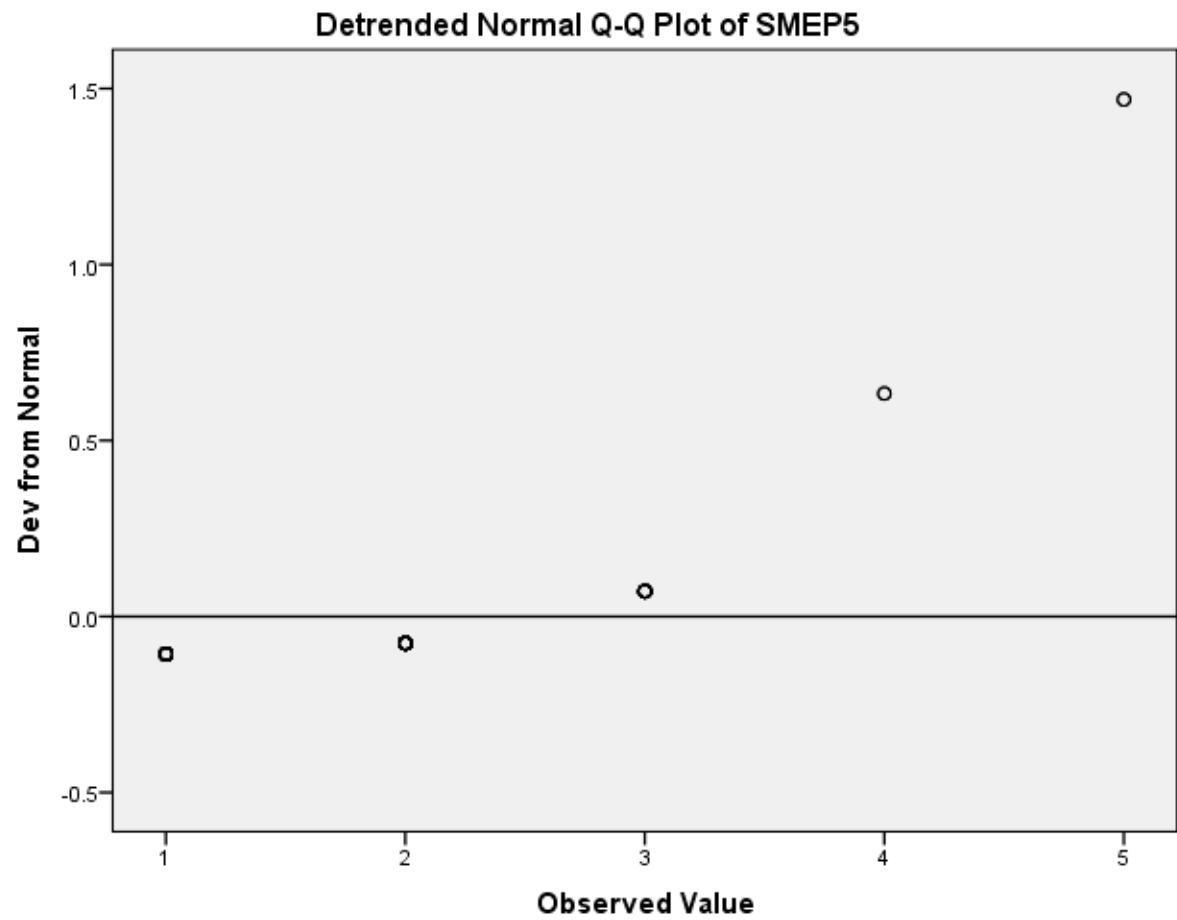

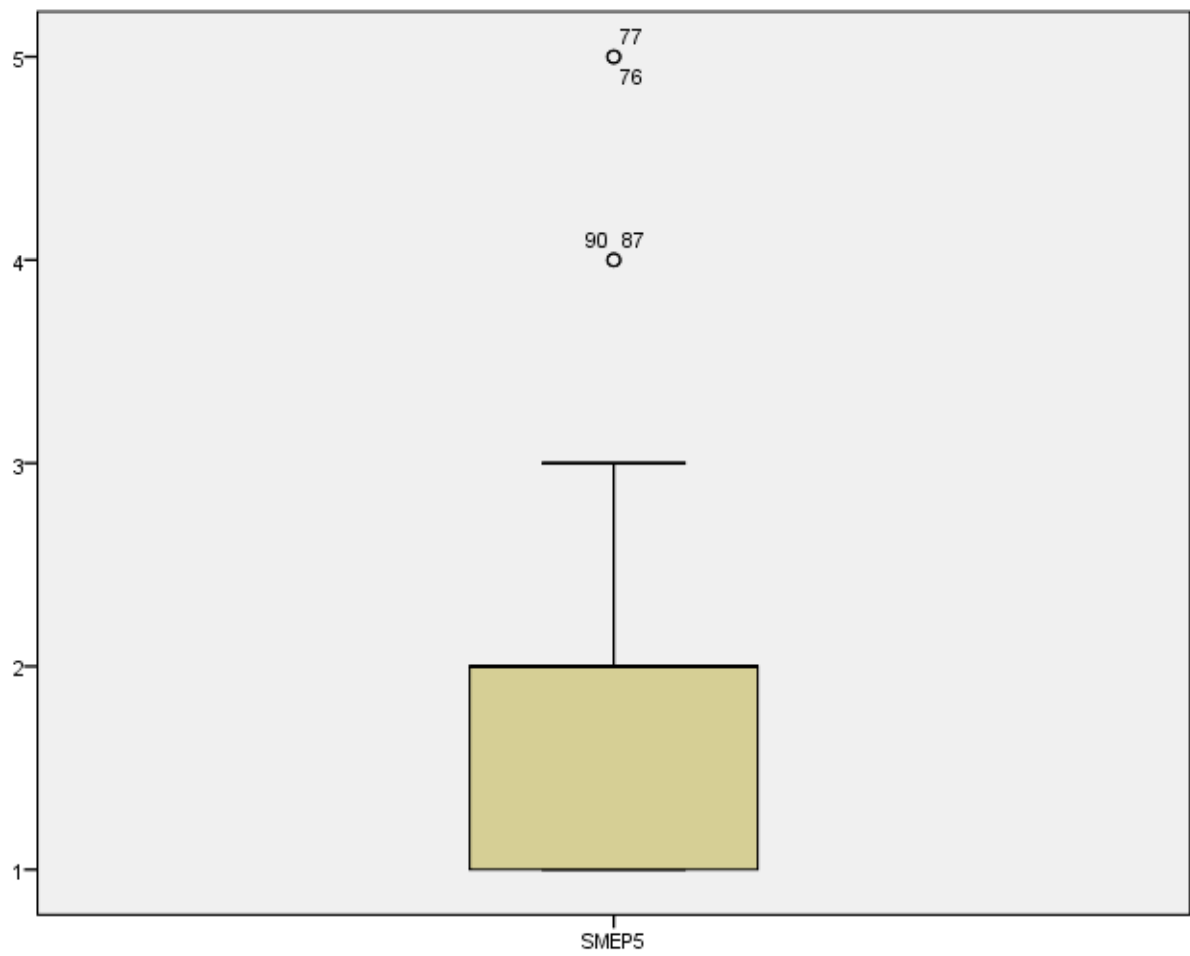

**SMEP6**

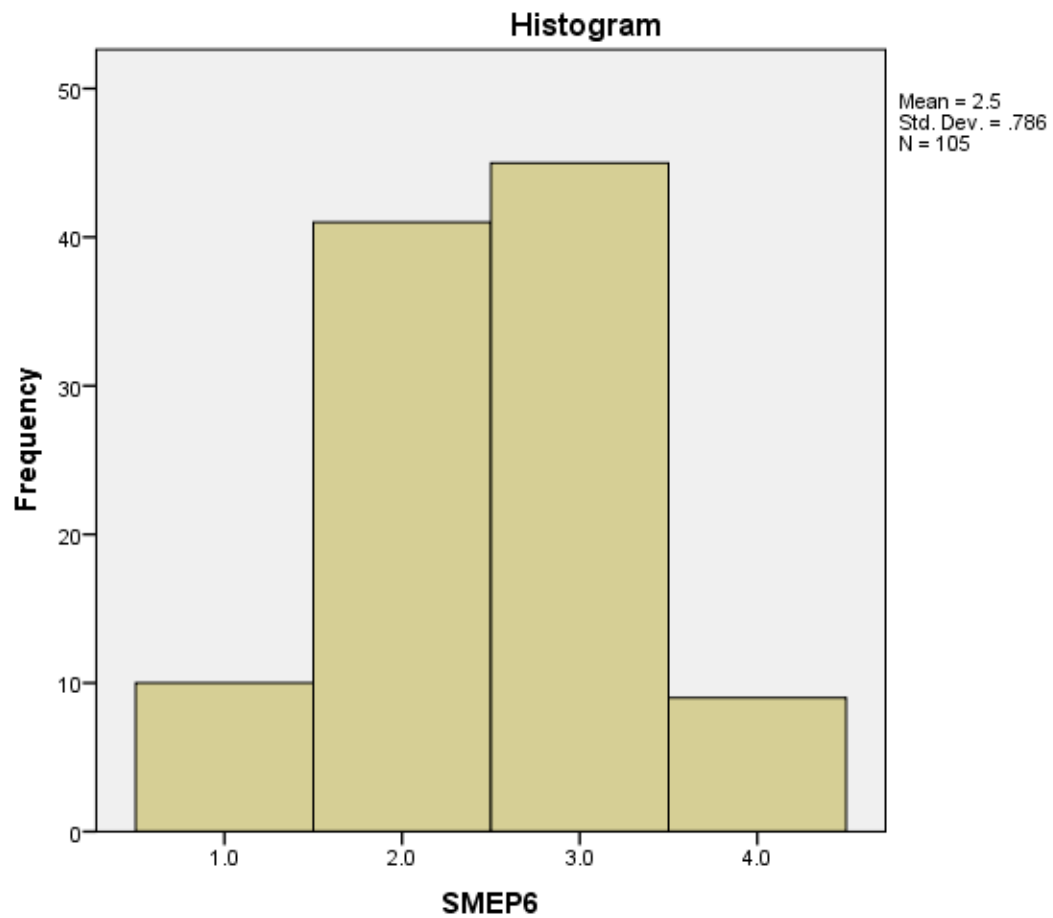

SMEP6 Stem-and-Leaf Plot

[illegible]



Normal Q-Q Plot of SMEP6

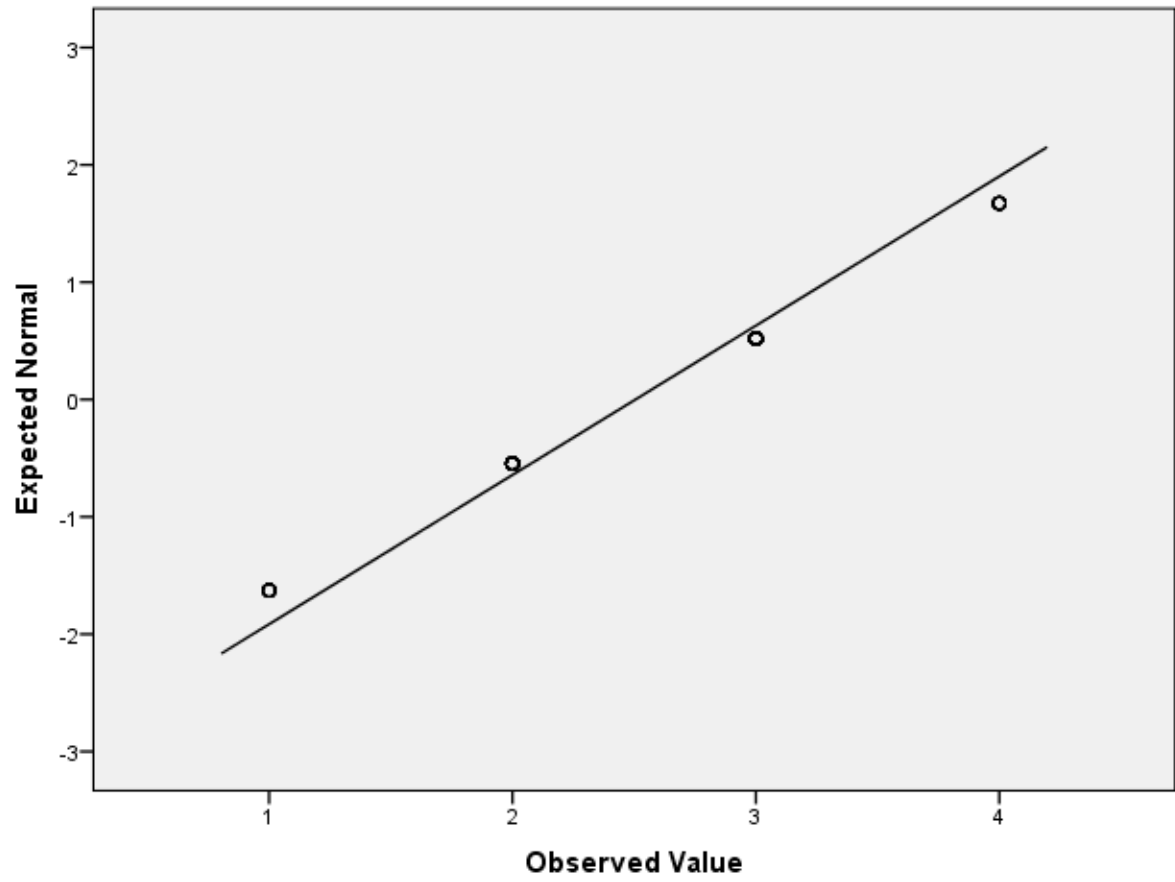

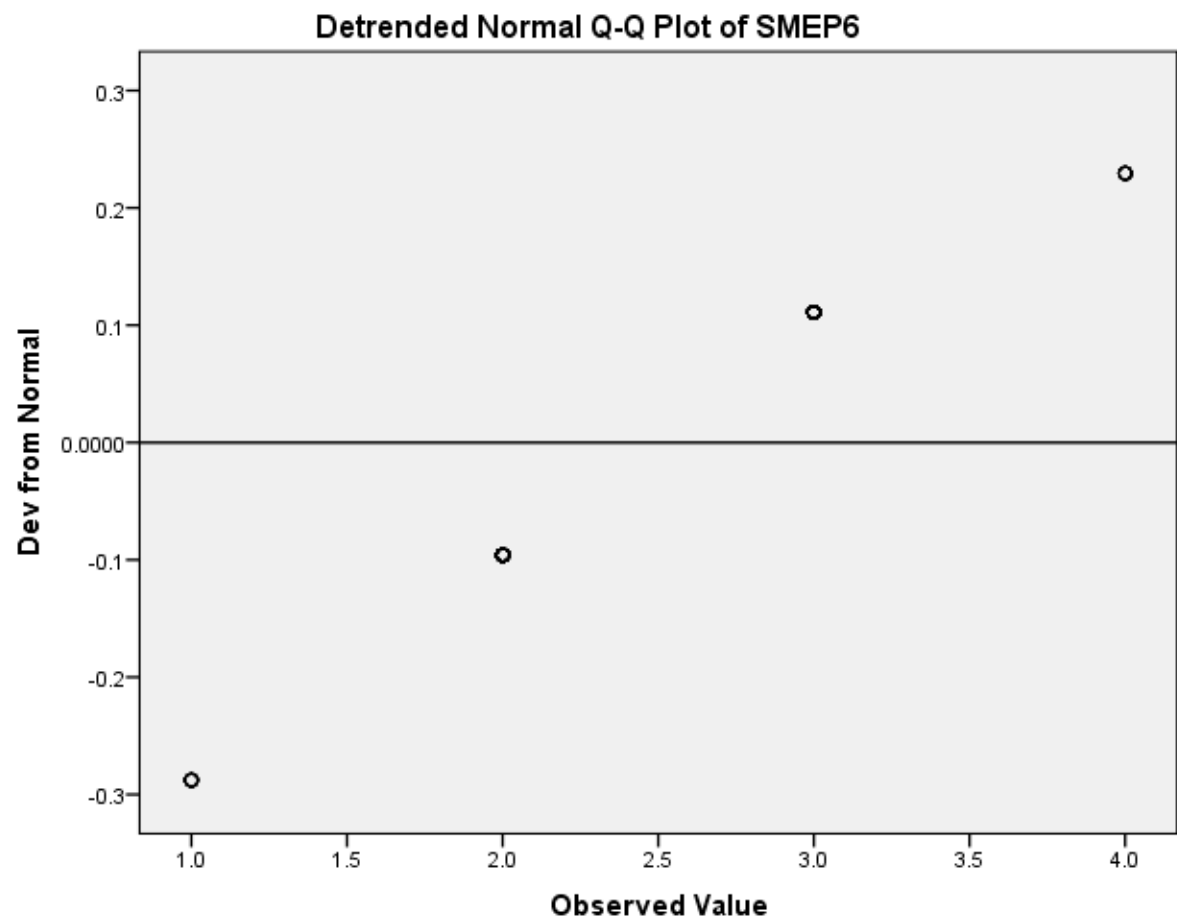

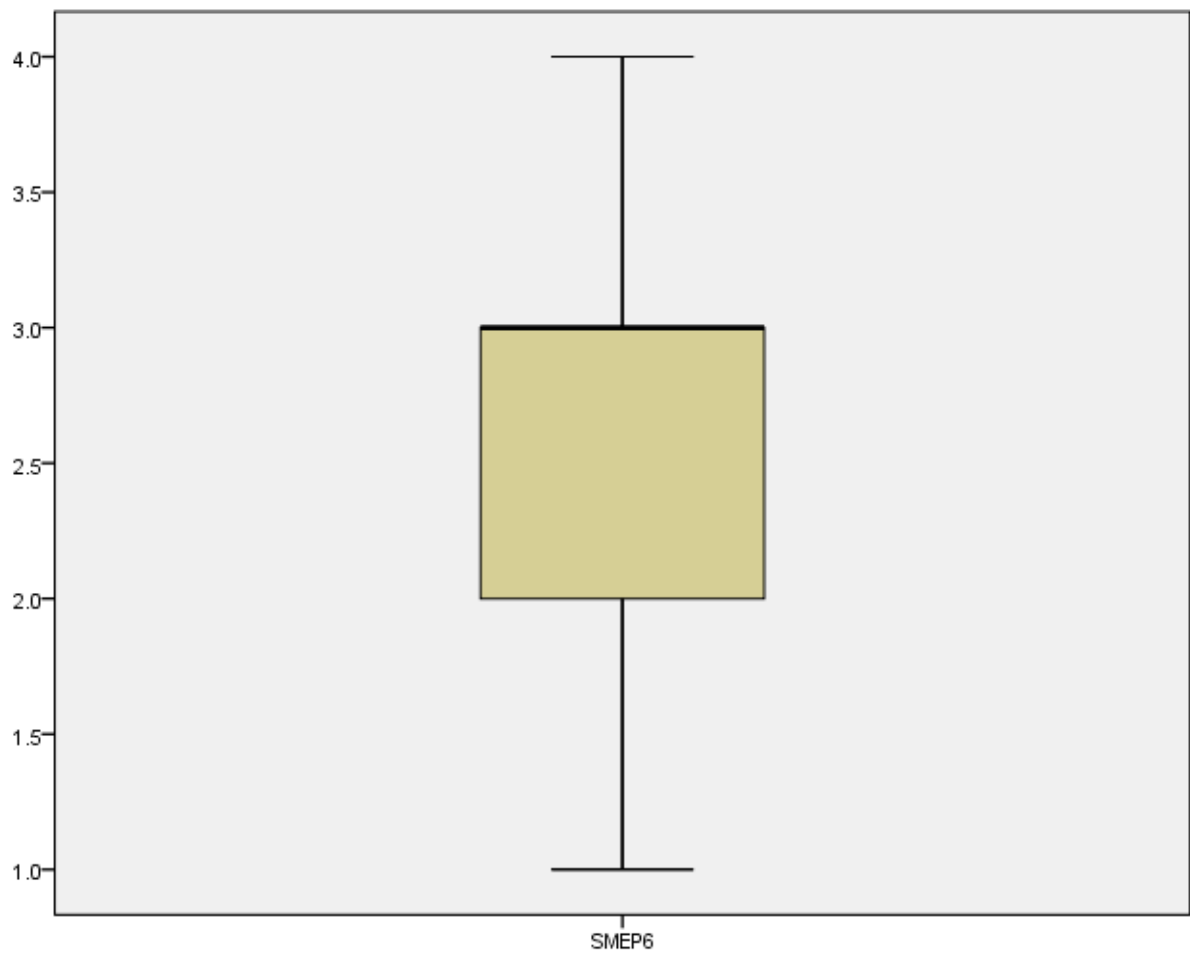

**SMEP7**

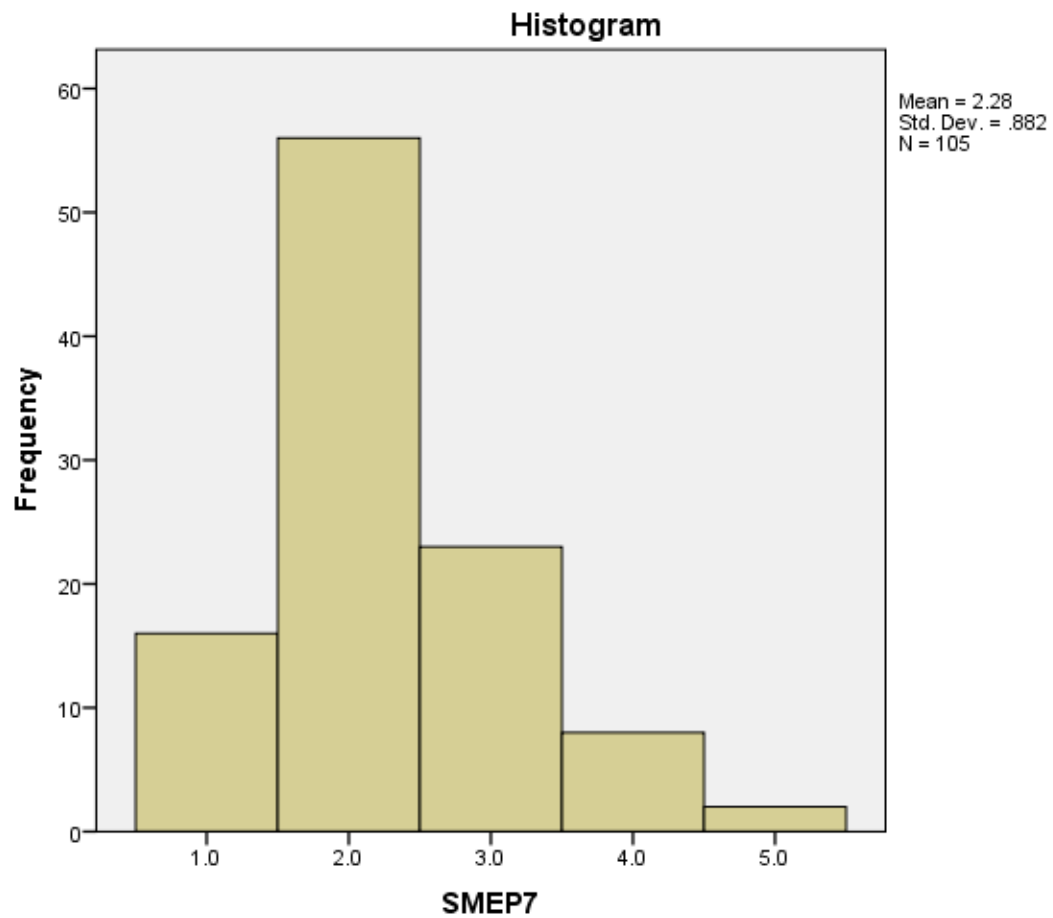

SMEP7 Stem-and-Leaf Plot

[illegible]

Normal Q-Q Plot of SMEP7

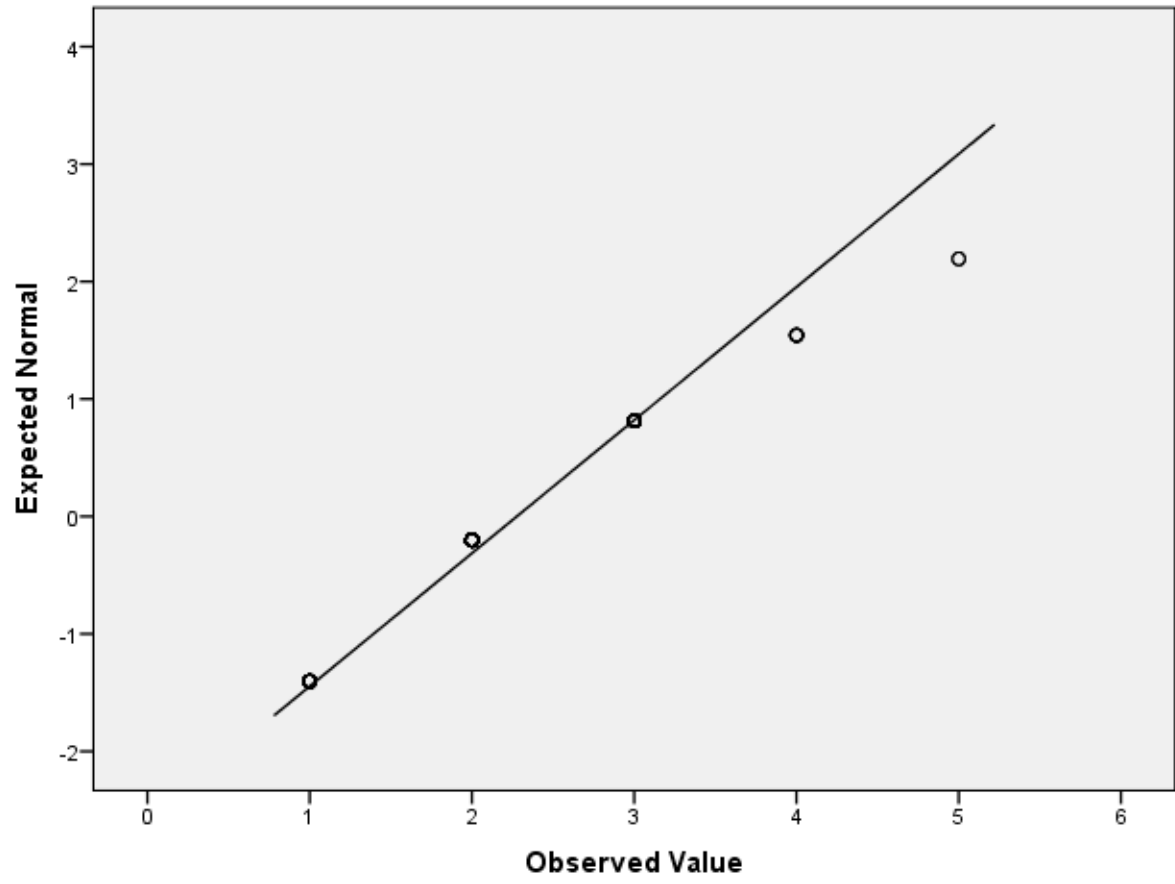

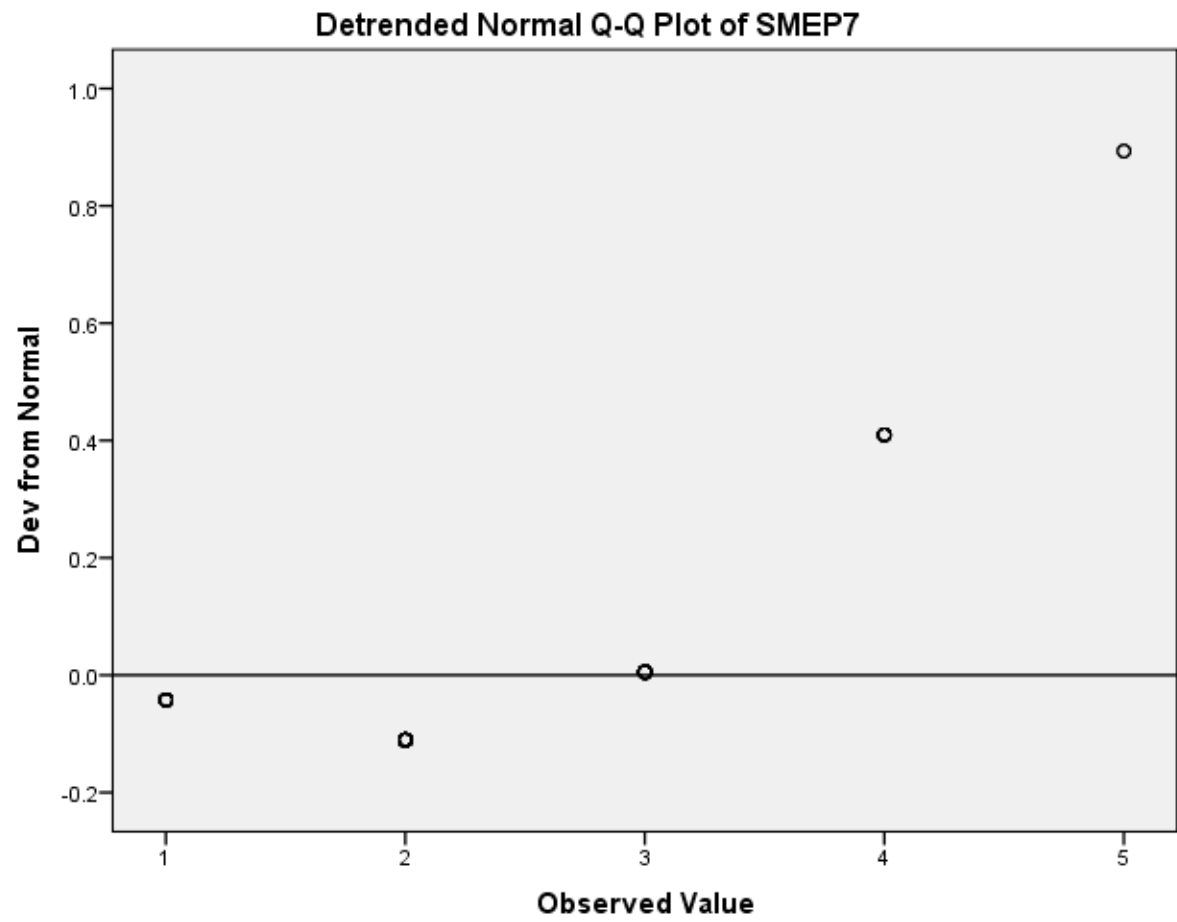

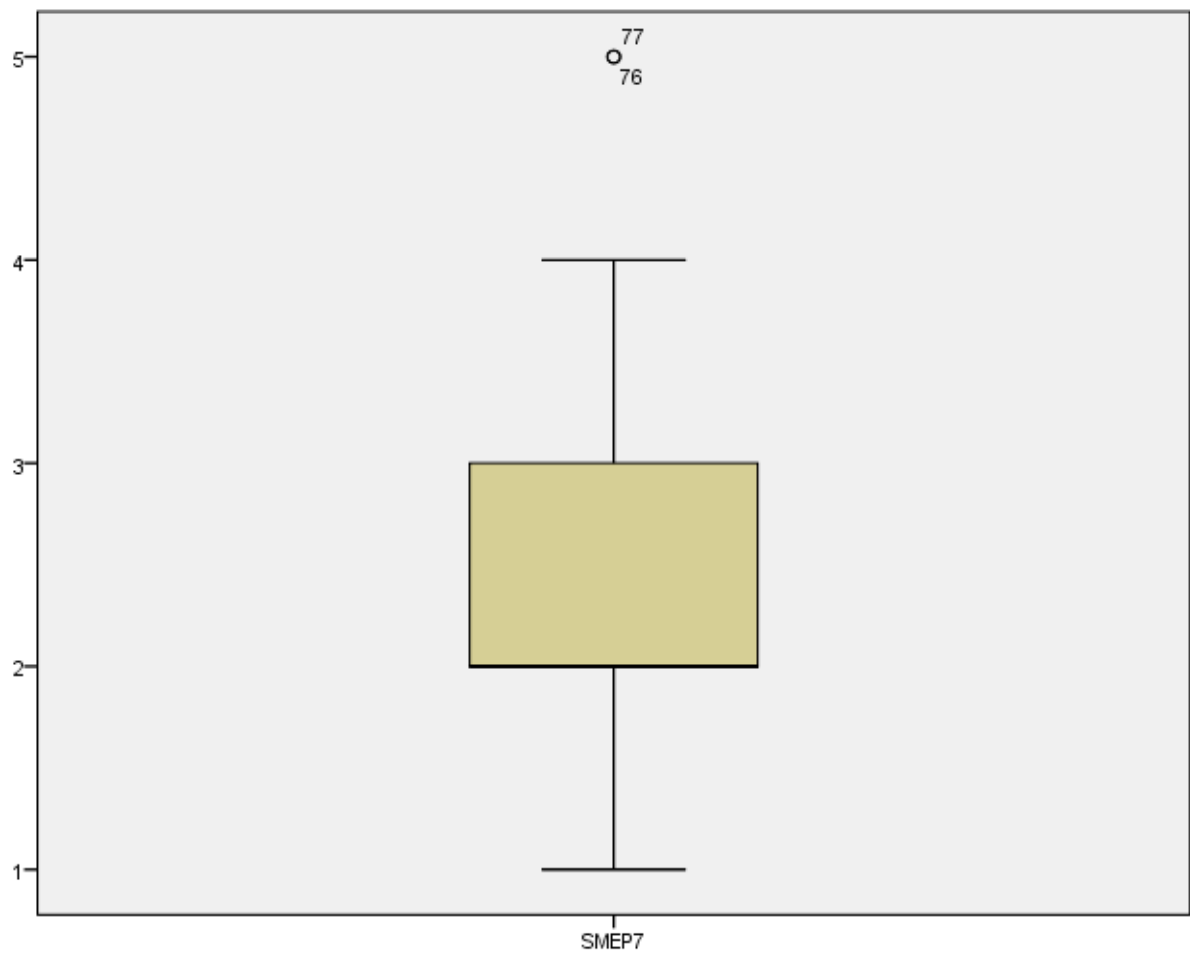

**SMEP8**

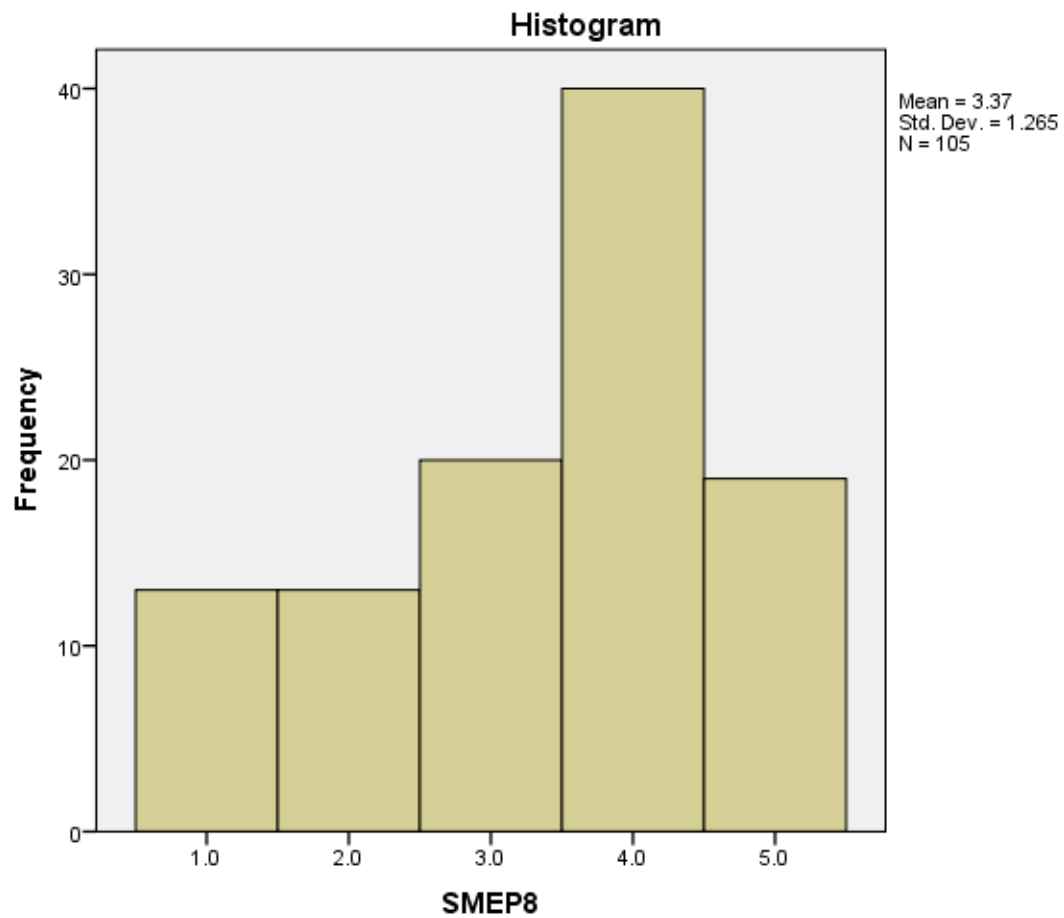

SMEP8 Stem-and-Leaf Plot

[illegible]



Normal Q-Q Plot of SMEP8

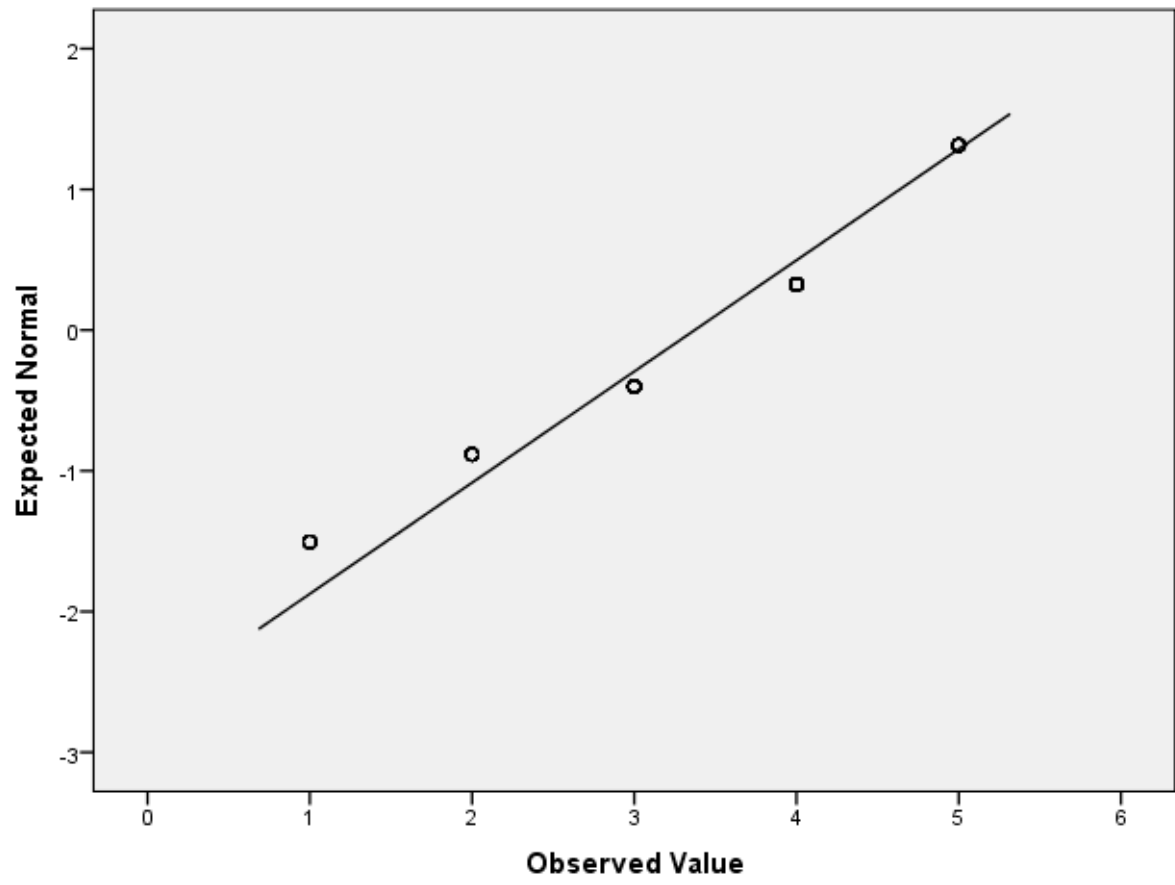

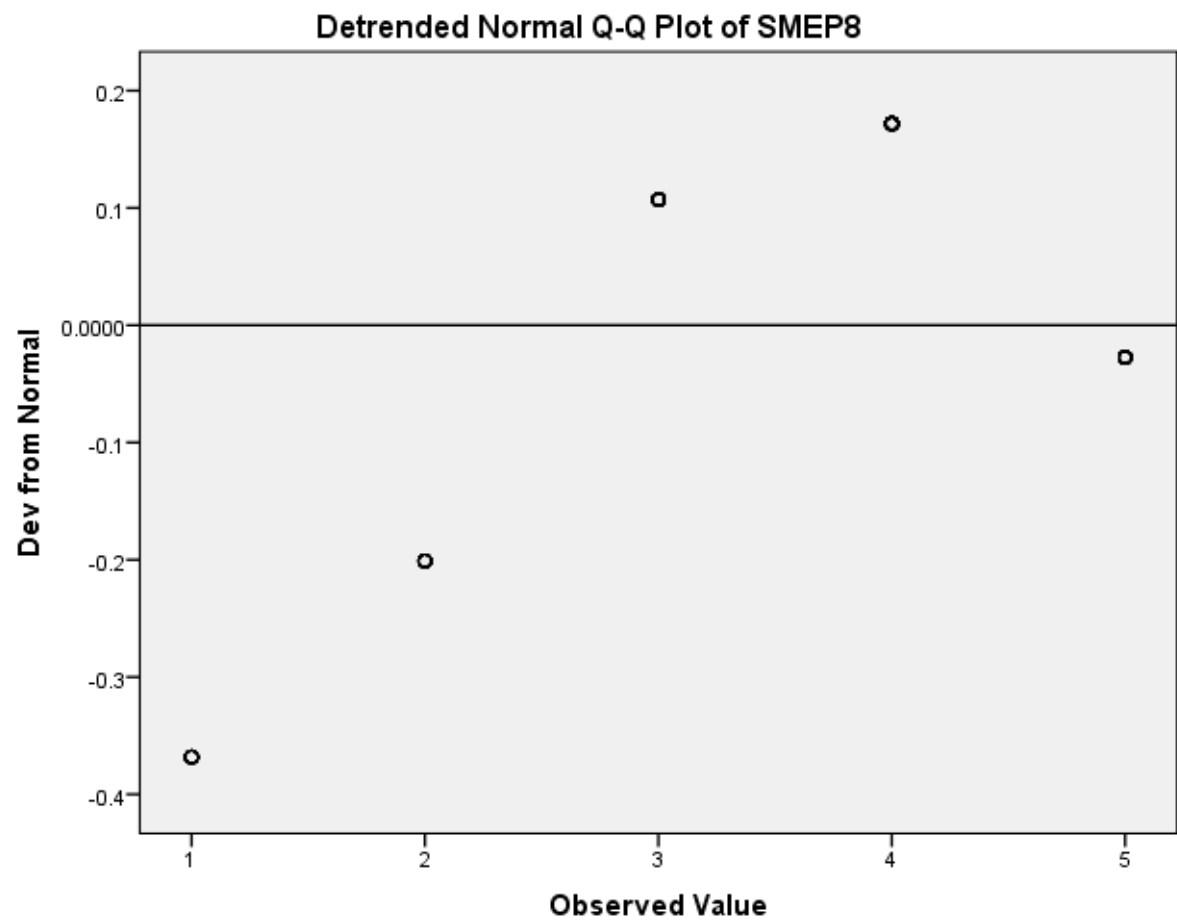

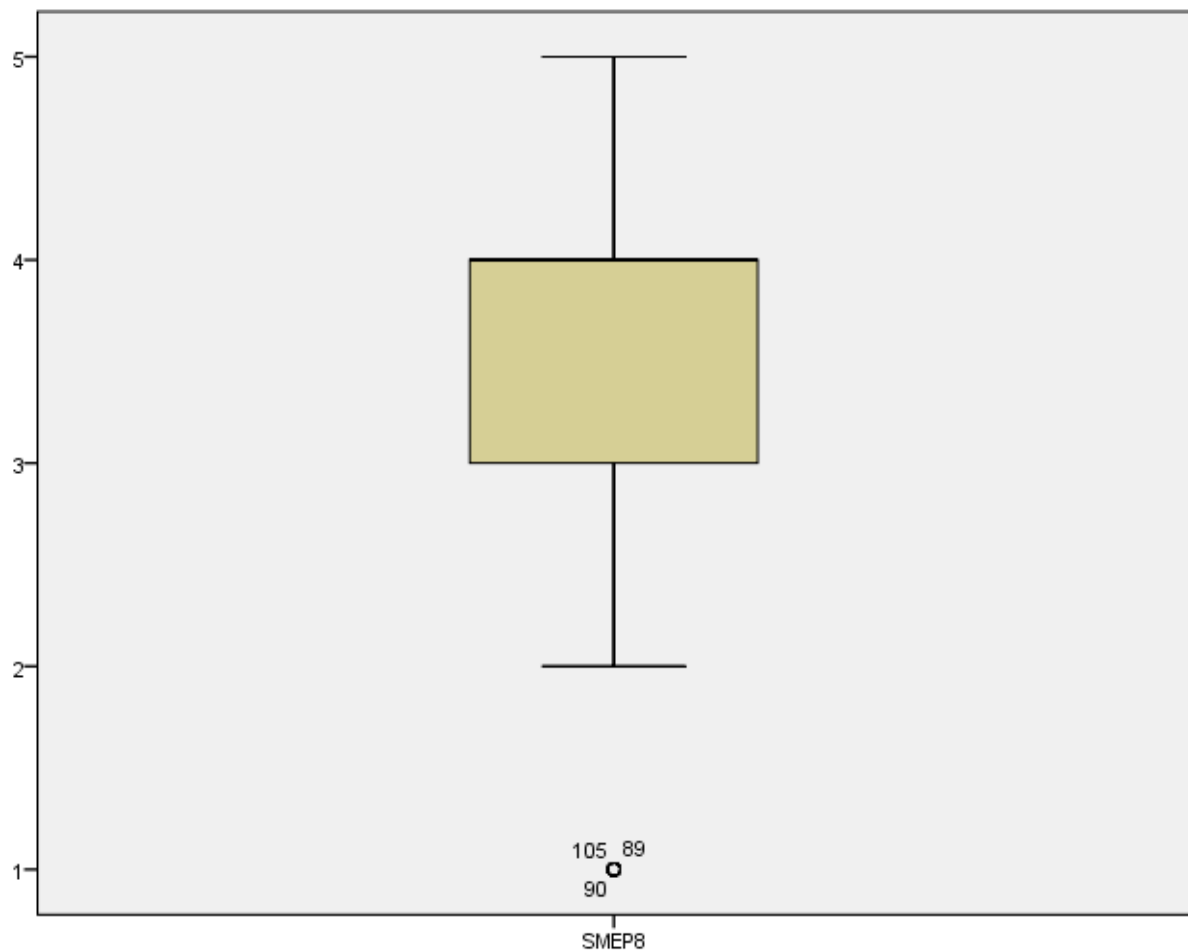

```

EXAMINE VARIABLES=MDRM SMPM SMFM
  /PLOT BOXPLOT STEMLEAF HISTOGRAM NPLOT
  /COMPARE GROUPS
  /STATISTICS EXTREME
  /MISSING REPORT
  /NOTOTAL.

```

## Explore

| Notes          |                |                                                                      |
|----------------|----------------|----------------------------------------------------------------------|
| Output Created |                | 15-SEP-2022 14:35:39                                                 |
| Comments       |                |                                                                      |
| Input          | Data           | C:\DBA\research paper,\German med paper\statistics\110 spss data.sav |
|                | Active Dataset | DataSet1                                                             |
|                | Filter         | <none>                                                               |

|                        |                                |                                                                                                                                                           |             |
|------------------------|--------------------------------|-----------------------------------------------------------------------------------------------------------------------------------------------------------|-------------|
|                        | Weight                         | <none>                                                                                                                                                    |             |
|                        | Split File                     | <none>                                                                                                                                                    |             |
|                        | N of Rows in Working Data File |                                                                                                                                                           | 110         |
| Missing Value Handling | Definition of Missing          | User-defined missing values for dependent variables are treated as missing. User-defined and system missing values for factors are treated as valid data. |             |
|                        | Cases Used                     | Statistics are based on cases with no missing values for any dependent variable or factor used.                                                           |             |
| Syntax                 |                                | EXAMINE VARIABLES=MDRM SMPM SMFM<br>/PLOT BOXPLOT STEMLEAF<br>HISTOGRAM NPLOT<br>/COMPARE GROUPS<br>/STATISTICS EXTREME<br>/MISSING REPORT<br>/NOTOTAL.   |             |
| Resources              | Processor Time                 |                                                                                                                                                           | 00:00:01.06 |
|                        | Elapsed Time                   |                                                                                                                                                           | 00:00:01.08 |

[DataSet1] C:\DBA\research paper,\German med paper\statistics\110 spss data.sav

#### Case Processing Summary

|      | Cases |         |         |         |       |         |
|------|-------|---------|---------|---------|-------|---------|
|      | Valid |         | Missing |         | Total |         |
|      | N     | Percent | N       | Percent | N     | Percent |
| MDRM | 110   | 100.0%  | 0       | 0.0%    | 110   | 100.0%  |
| SMPM | 110   | 100.0%  | 0       | 0.0%    | 110   | 100.0%  |
| SMFM | 110   | 100.0%  | 0       | 0.0%    | 110   | 100.0%  |

#### Extreme Values

|      |         |   | Case Number | Value              |
|------|---------|---|-------------|--------------------|
| MDRM | Highest | 1 | 76          | 3.4166666666666666 |
|      |         |   |             | 67664              |

|      |         |        |         |     |               |                    |
|------|---------|--------|---------|-----|---------------|--------------------|
|      |         |        | 2       | 77  | 3.25000000000 | 01000              |
|      |         |        | 3       | 90  | 3.25000000000 | 01000              |
|      |         |        | 4       | 85  | 3.16666666666 | 67664              |
|      |         |        | 5       | 21  | 3.08333333333 | 34334 <sup>a</sup> |
|      |         |        | 1       | 9   | 1.25000000000 | 01000              |
|      |         |        | 2       | 2   | 1.58333333333 | 34332              |
|      |         | Lowest | 3       | 110 | 1.75000000000 | 01000              |
|      |         |        | 4       | 14  | 1.75000000000 | 01000              |
|      |         |        | 5       | 8   | 1.75000000000 | 01000 <sup>b</sup> |
|      |         |        | 1       | 76  | 3.42708333333 | 34334              |
| SMPM |         |        | 2       | 21  | 3.26041666666 | 67664              |
|      |         |        | Highest | 57  | 3.26041666666 | 67664              |
|      |         |        | 4       | 99  | 3.26041666666 | 67664              |
|      |         |        | 5       | 56  | 3.25000000000 | 01000              |
|      |         |        | 1       | 9   | 1.03125000000 | 01000              |
|      |         |        | 2       | 2   | 1.19791666666 | 67667              |
|      |         | Lowest | 3       | 8   | 1.71875000000 | 01000              |
|      |         |        | 4       | 6   | 1.71875000000 | 01000              |
|      |         |        | 5       | 32  | 1.73958333333 | 34332              |
|      |         |        | 1       | 56  | 3.70833333333 | 34334              |
| SMFM | Highest |        | 2       | 55  | 3.31770833333 | 34334              |

|        |   |    |                             |
|--------|---|----|-----------------------------|
|        | 3 | 74 | 3.3020833333333333<br>34334 |
|        | 4 | 21 | 3.2239583333333333<br>34334 |
|        | 5 | 99 | 3.2239583333333333<br>34334 |
|        | 1 | 9  | 1.046875000000<br>01000     |
|        | 2 | 2  | 1.1302083333333333<br>34332 |
| Lowest | 3 | 6  | 1.578125000000<br>01000     |
|        | 4 | 12 | 1.7291666666666666<br>67667 |
|        | 5 | 8  | 1.7447916666666666<br>67667 |

- a. Only a partial list of cases with the value 3.0833333333333334 are shown in the table of upper extremes.
- b. Only a partial list of cases with the value 1.75000000000001000 are shown in the table of lower extremes.

**Tests of Normality**

|      | Kolmogorov-Smirnov <sup>a</sup> |     |      | Shapiro-Wilk |     |      |
|------|---------------------------------|-----|------|--------------|-----|------|
|      | Statistic                       | df  | Sig. | Statistic    | df  | Sig. |
| MDRM | .126                            | 110 | .000 | .969         | 110 | .015 |
| SMPM | .123                            | 110 | .000 | .945         | 110 | .000 |
| SMFM | .159                            | 110 | .000 | .927         | 110 | .000 |

- a. Lilliefors Significance Correction

**MDRM**

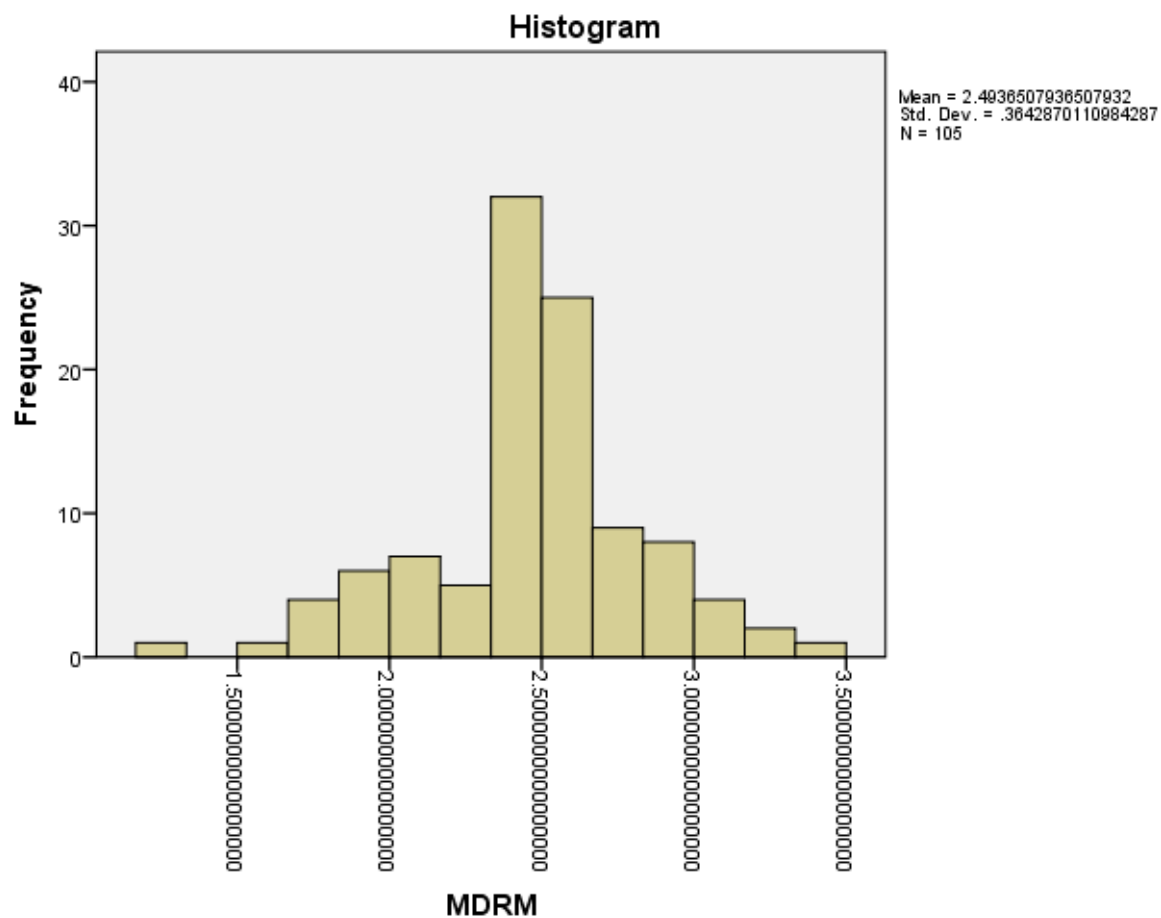

#### MDRM Stem-and-Leaf Plot

| Frequency | Stem &   | Leaf                          |
|-----------|----------|-------------------------------|
| 6.00      | Extremes | (= $1.75$ )                   |
| 2.00      | 19 .     | 11                            |
| 9.00      | 20 .     | 000088888                     |
| 2.00      | 21 .     | 66                            |
| 5.00      | 22 .     | 55555                         |
| 7.00      | 23 .     | 3333333                       |
| 9.00      | 24 .     | 111111111                     |
| 27.00     | 25 .     | 00000000000000008888888888888 |
| 14.00     | 26 .     | 666666666666666               |
| 9.00      | 27 .     | 555555555                     |
| 3.00      | 28 .     | 333                           |
| 3.00      | 29 .     | 111                           |
| 5.00      | 30 .     | 00888                         |
| 4.00      | Extremes | ( $\geq 3.17$ )               |

Stem width: .1000000  
Each leaf: 1 case(s)

Normal Q-Q Plot of MDRM

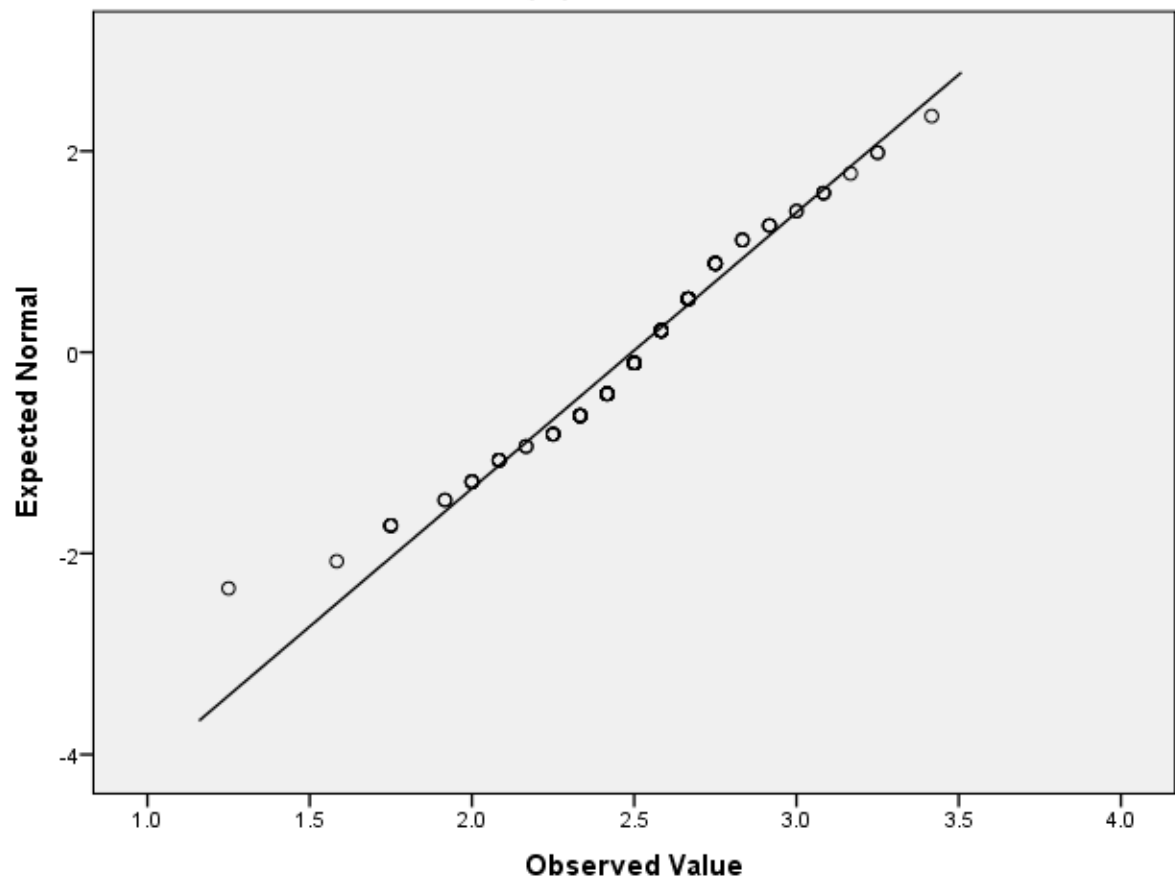



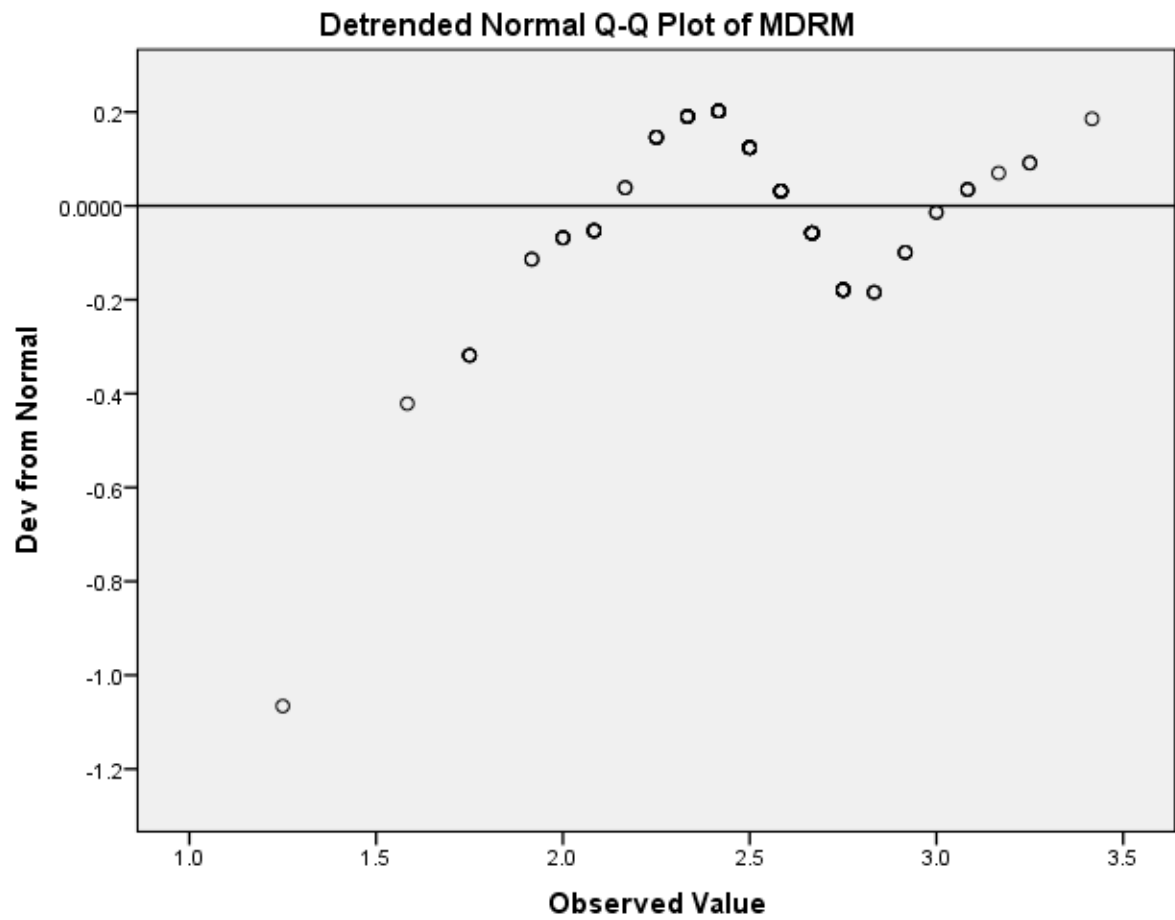

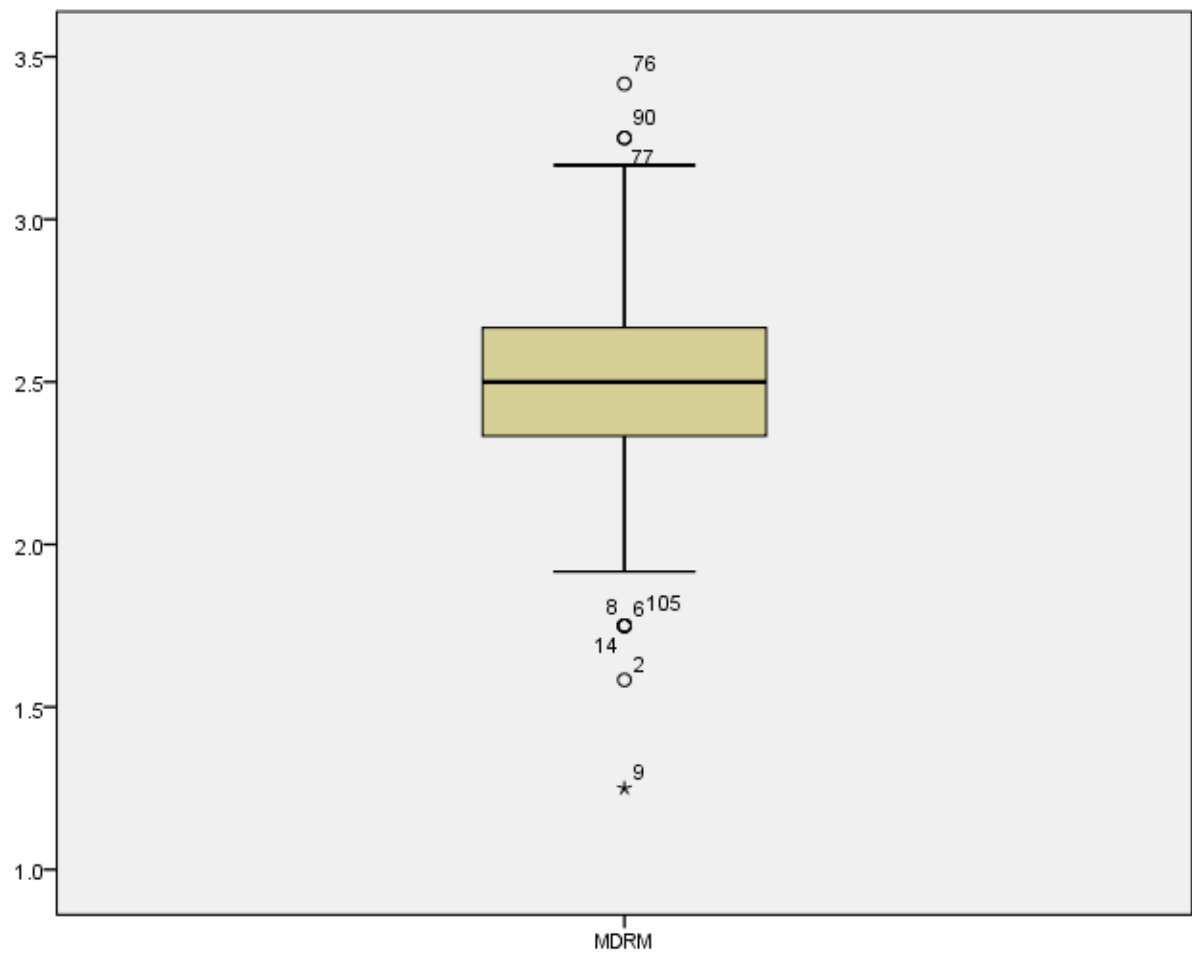

**SMPM**

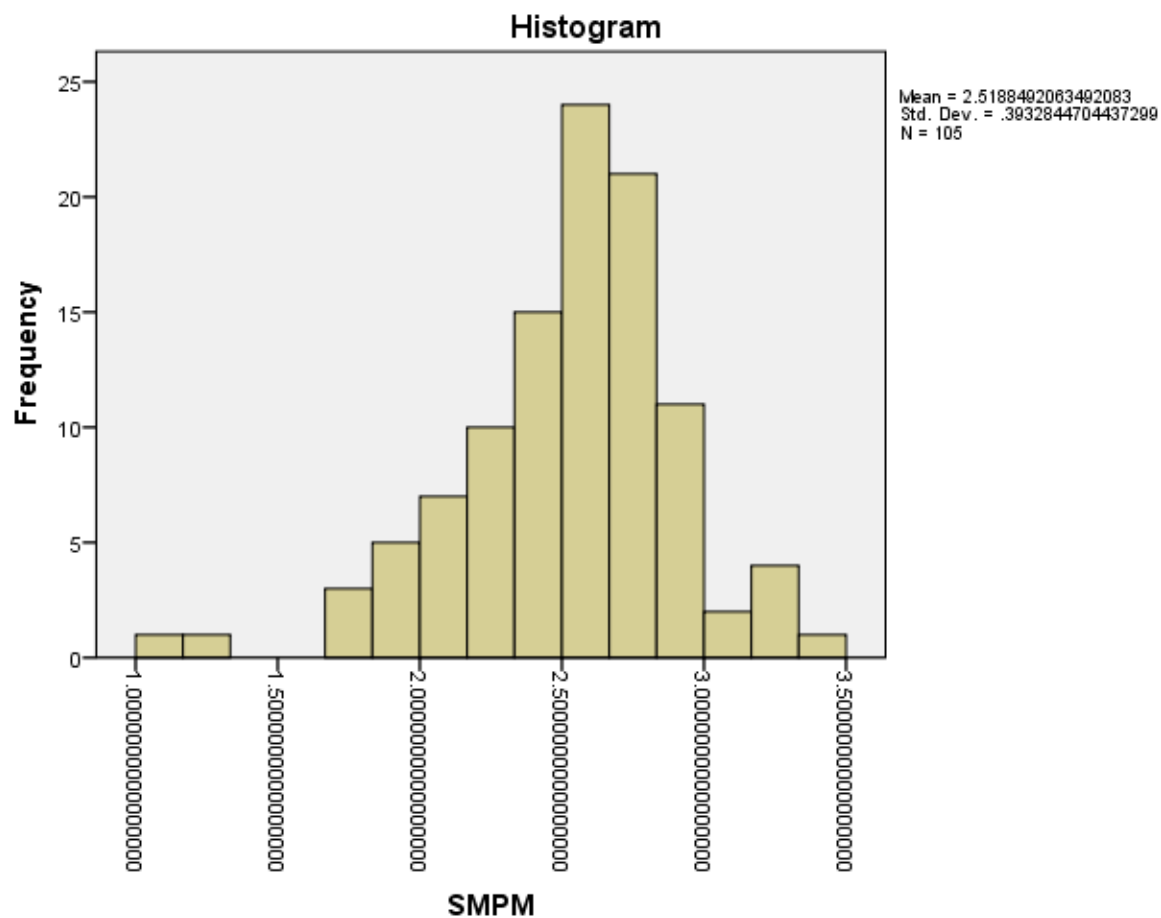

#### SMPM Stem-and-Leaf Plot

| Frequency | Stem &   | Leaf                    |
|-----------|----------|-------------------------|
| 5.00      | Extremes | (=<1.74)                |
| 2.00      | 18 .     | 67                      |
| 2.00      | 19 .     | 66                      |
| 5.00      | 20 .     | 01244                   |
| 3.00      | 21 .     | 255                     |
| 7.00      | 22 .     | 5666889                 |
| 5.00      | 23 .     | 01289                   |
| 13.00     | 24 .     | 1222223333333           |
| 23.00     | 25 .     | 44455666677777788888999 |
| 7.00      | 26 .     | 5788999                 |
| 12.00     | 27 .     | 000000001128            |
| 10.00     | 28 .     | 1134444566              |
| 3.00      | 29 .     | 478                     |
| 1.00      | 30 .     | 0                       |
| 2.00      | 31 .     | 45                      |
| 4.00      | 32 .     | 5666                    |
| 1.00      | Extremes | (>=3.43)                |

Stem width: .1000000  
 Each leaf: 1 case(s)

Normal Q-Q Plot of SMPM

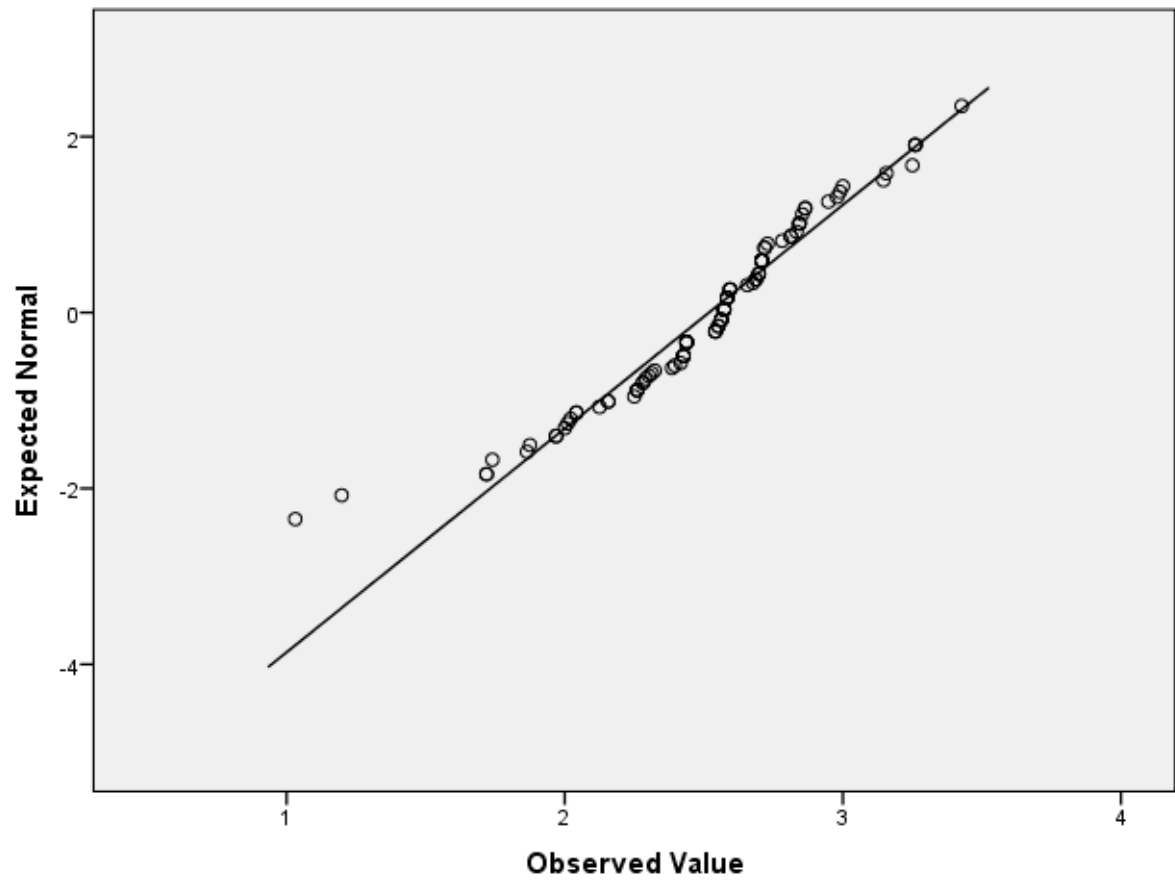

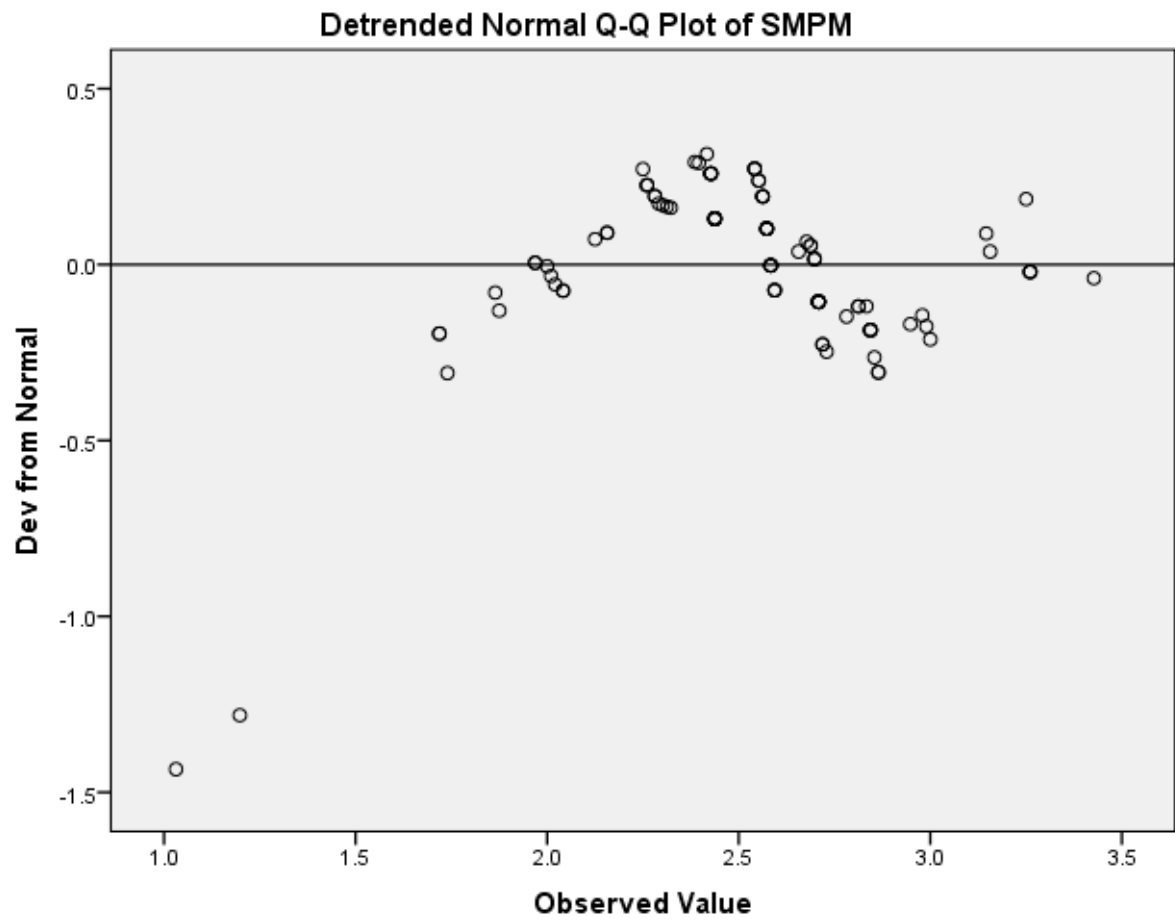

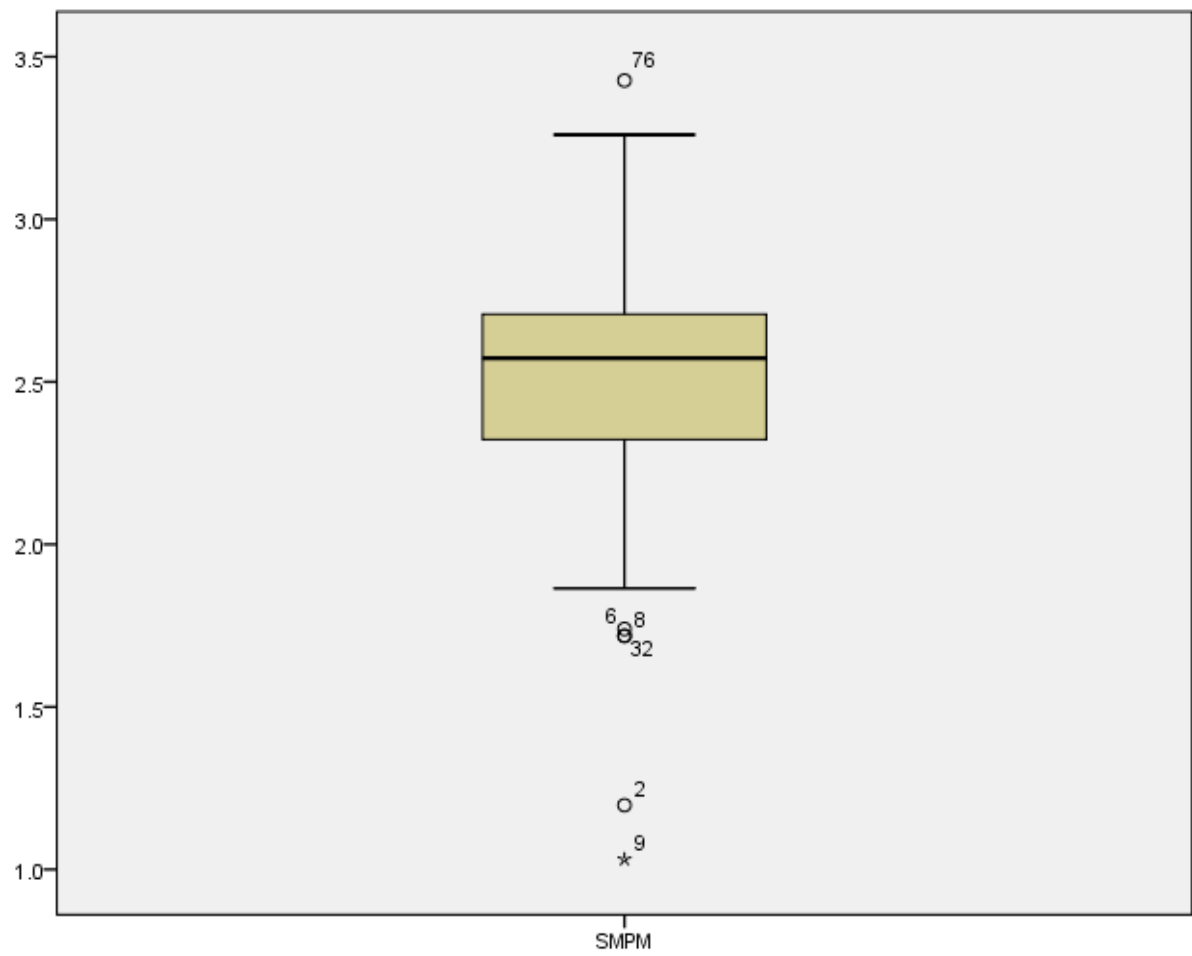

**SMFM**

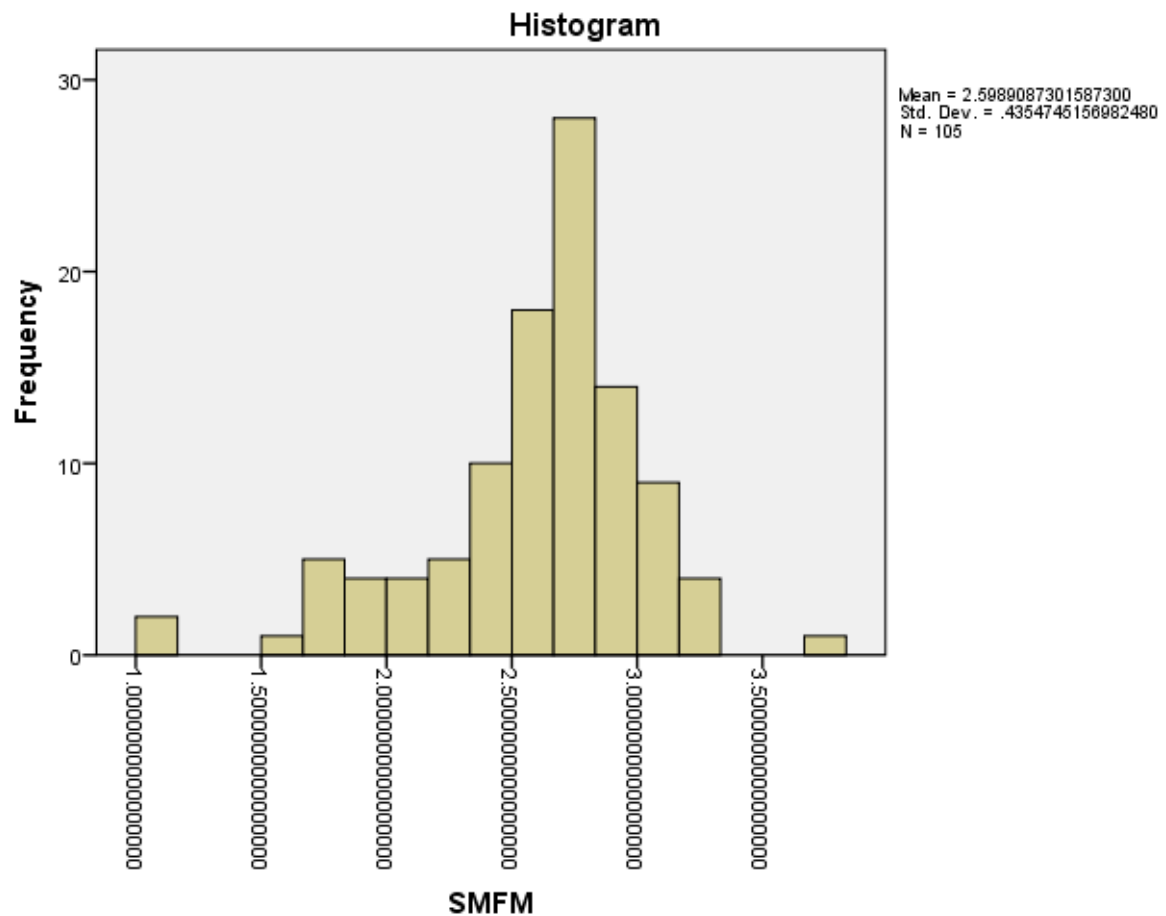

#### SMFM Stem-and-Leaf Plot

| Frequency | Stem &   | Leaf                 |
|-----------|----------|----------------------|
| 8.00      | Extremes | (=<1.80)             |
| 1.00      | 18 .     | 9                    |
| 2.00      | 19 .     | 57                   |
| 3.00      | 20 .     | 013                  |
| 2.00      | 21 .     | 05                   |
| 3.00      | 22 .     | 035                  |
| 2.00      | 23 .     | 00                   |
| 10.00     | 24 .     | 0556778888           |
| 12.00     | 25 .     | 112225566789         |
| 13.00     | 26 .     | 4455567799999        |
| 20.00     | 27 .     | 00001112222222224668 |
| 6.00      | 28 .     | 167899               |
| 8.00      | 29 .     | 01237789             |
| 8.00      | 30 .     | 01155799             |
| 2.00      | 31 .     | 33                   |
| 2.00      | 32 .     | 22                   |
| 2.00      | 33 .     | 01                   |
| 1.00      | Extremes | (>=3.71)             |

Stem width: .1000000  
Each leaf: 1 case(s)

Normal Q-Q Plot of SMFM

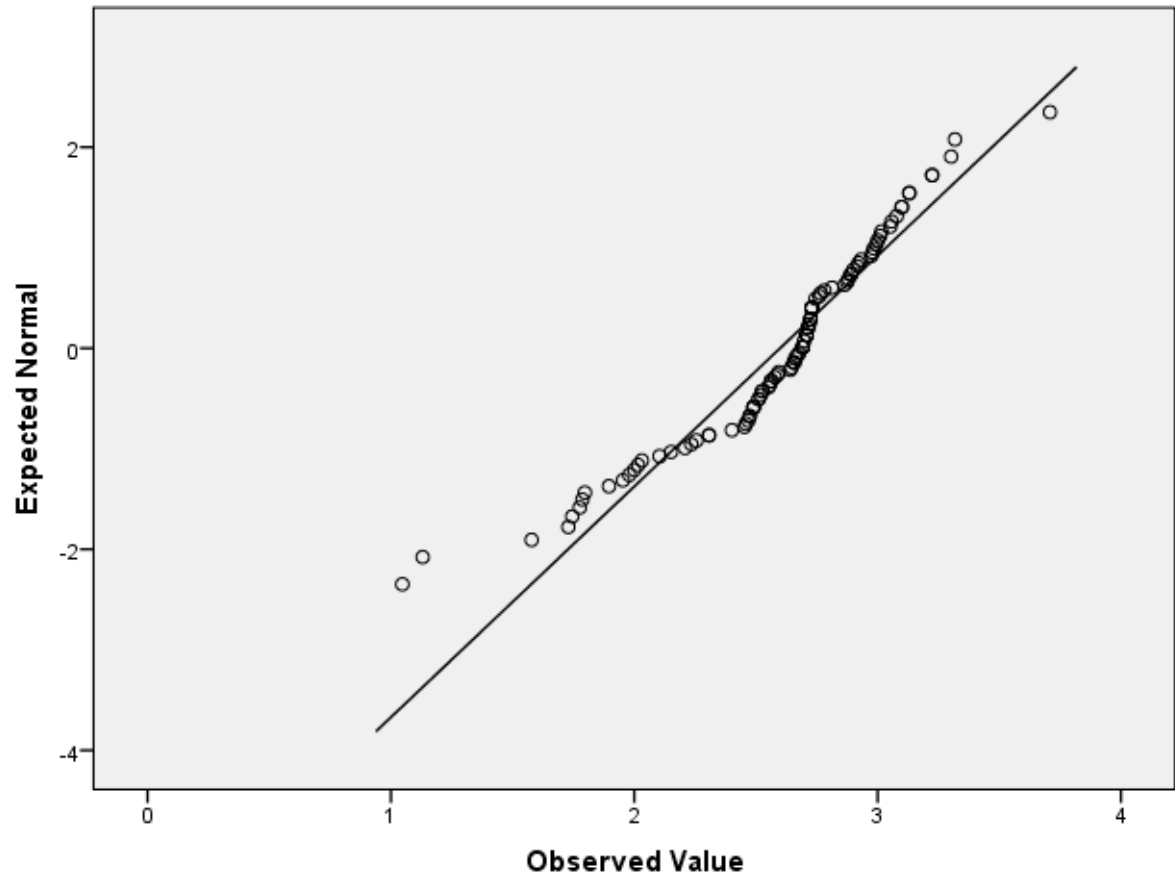



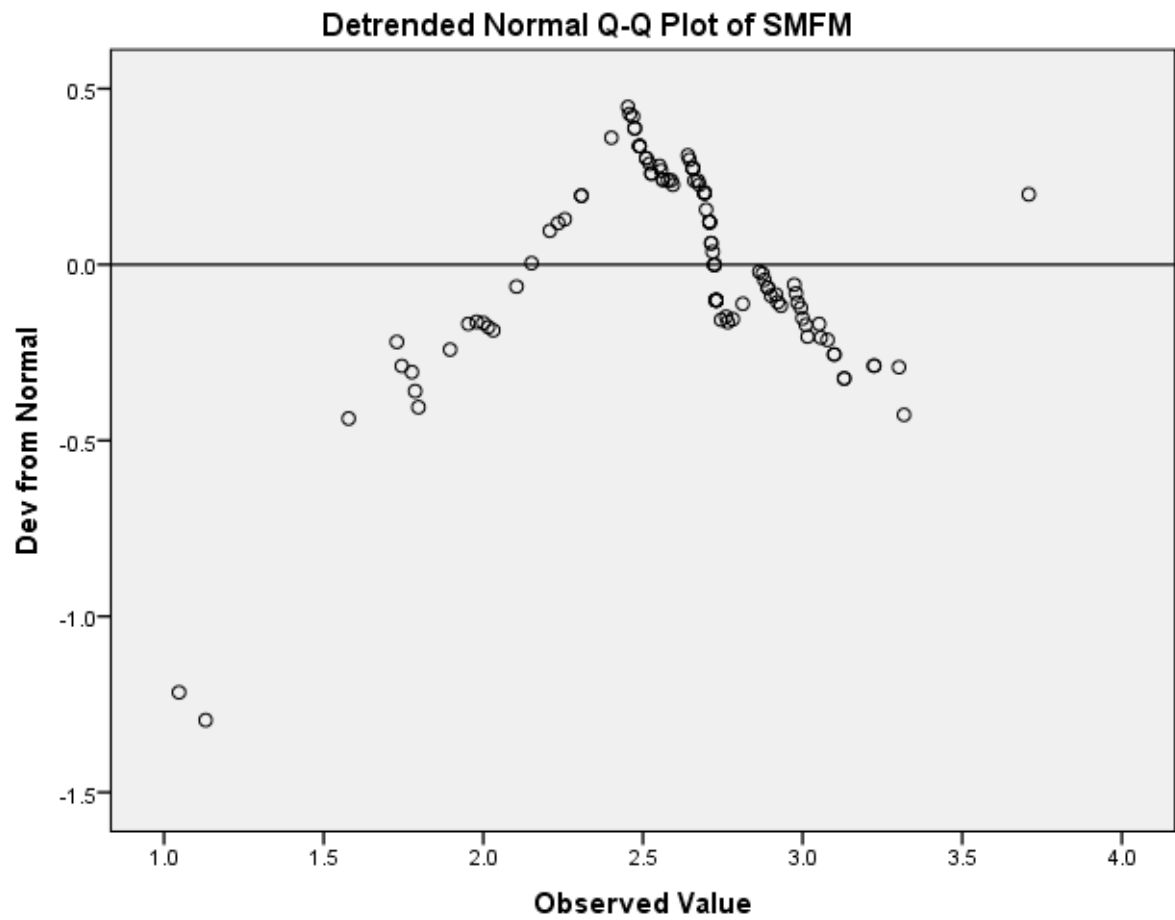

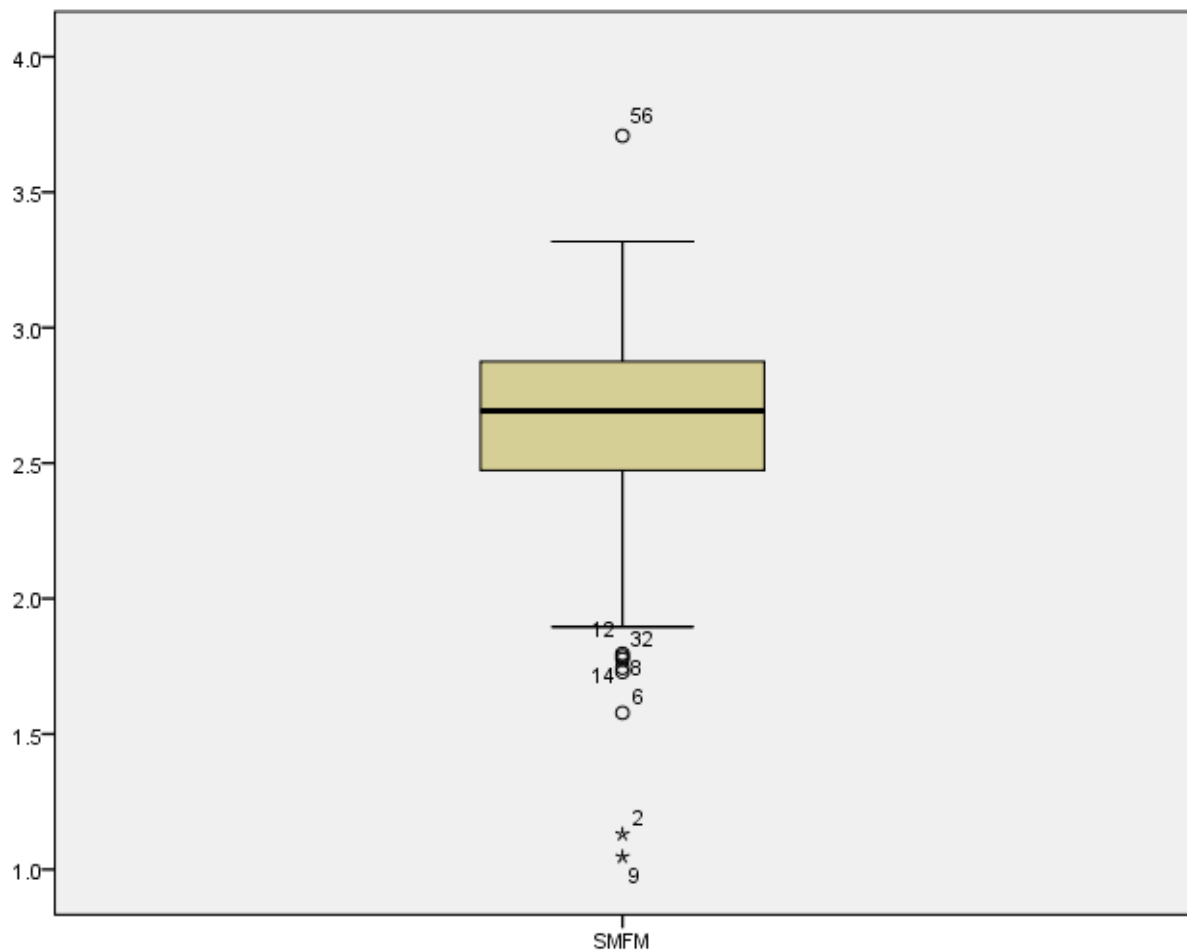

```

FACTOR
/VARIABLES MDR1 MDR2 MDR3 MDR4 MDR5 MDR6 MDR7 MDR8 MDR9 MDR11
/MISSING LISTWISE
/ANALYSIS MDR1 MDR2 MDR3 MDR4 MDR5 MDR6 MDR7 MDR8 MDR9 MDR11
/PRINT INITIAL KMO EXTRACTION ROTATION
/PLOT EIGEN
/CRITERIA MINEIGEN(1) ITERATE(25)
/EXTRACTION PC
/CRITERIA ITERATE(25)
/ROTATION VARIMAX
/METHOD=CORRELATION.

```

## Factor Analysis

### Notes

Output Created  
Comments

15-SEP-2022 14:38:30

|                        |                           |                                                                                       |
|------------------------|---------------------------|---------------------------------------------------------------------------------------|
| Input                  | Data                      | C:\DBA\research paper,\German med paper\statistics\110 spss data.sav                  |
|                        | Active Dataset            | DataSet1                                                                              |
|                        | Filter                    | <none>                                                                                |
|                        | Weight                    | <none>                                                                                |
|                        | Split File                | <none>                                                                                |
| Missing Value Handling | N of Rows in Working Data | 110                                                                                   |
|                        | File                      |                                                                                       |
|                        | Definition of Missing     | MISSING=EXCLUDE: User-defined missing values are treated as missing.                  |
| Syntax                 | Cases Used                | LISTWISE: Statistics are based on cases with no missing values for any variable used. |
|                        |                           | FACTOR                                                                                |
|                        |                           | /VARIABLES MDR1 MDR2 MDR3 MDR4 MDR5 MDR6 MDR7 MDR8 MDR9 MDR11                         |
|                        |                           | /MISSING LISTWISE                                                                     |
|                        |                           | /ANALYSIS MDR1 MDR2 MDR3 MDR4 MDR5 MDR6 MDR7 MDR8 MDR9 MDR11                          |
| Resources              |                           | /PRINT INITIAL KMO EXTRACTION ROTATION                                                |
|                        |                           | /PLOT EIGEN                                                                           |
|                        |                           | /CRITERIA MINEIGEN(1)                                                                 |
|                        |                           | ITERATE(25)                                                                           |
|                        |                           | /EXTRACTION PC                                                                        |
| Resources              | Processor Time            | 00:00:00.14                                                                           |
|                        | Elapsed Time              | 00:00:00.13                                                                           |
|                        | Maximum Memory Required   | 13688 (13.367K) bytes                                                                 |

[DataSet1] C:\DBA\research paper,\German med paper\statistics\110 spss data.sav

#### KMO and Bartlett's Test

|                                                     |         |
|-----------------------------------------------------|---------|
| Kaiser-Meyer-Olkin Measure of Sampling Adequacy.    | .800    |
| Bartlett's Test of Sphericity    Approx. Chi-Square | 314.127 |

|      |      |
|------|------|
| df   | 45   |
| Sig. | .000 |

| Communalities |         |            |
|---------------|---------|------------|
|               | Initial | Extraction |
| MDR1          | 1.000   | .575       |
| MDR2          | 1.000   | .454       |
| MDR3          | 1.000   | .301       |
| MDR4          | 1.000   | .558       |
| MDR5          | 1.000   | .529       |
| MDR6          | 1.000   | .524       |
| MDR7          | 1.000   | .799       |
| MDR8          | 1.000   | .486       |
| MDR9          | 1.000   | .566       |
| MDR11         | 1.000   | .361       |

Extraction Method: Principal  
Component Analysis.

| Total Variance Explained |                     |               |              |                                     |               |
|--------------------------|---------------------|---------------|--------------|-------------------------------------|---------------|
| Component                | Initial Eigenvalues |               |              | Extraction Sums of Squared Loadings |               |
|                          | Total               | % of Variance | Cumulative % | Total                               | % of Variance |
| 1                        | 3.767               | 37.665        | 37.665       | 3.767                               | 37.665        |
| 2                        | 1.386               | 13.859        | 51.525       | 1.386                               | 13.859        |
| 3                        | .994                | 9.940         | 61.465       |                                     |               |
| 4                        | .811                | 8.110         | 69.575       |                                     |               |
| 5                        | .746                | 7.458         | 77.033       |                                     |               |
| 6                        | .629                | 6.290         | 83.323       |                                     |               |
| 7                        | .607                | 6.072         | 89.395       |                                     |               |
| 8                        | .509                | 5.086         | 94.481       |                                     |               |
| 9                        | .351                | 3.509         | 97.990       |                                     |               |
| 10                       | .201                | 2.010         | 100.000      |                                     |               |

| Total Variance Explained |                                     |                                   |               |              |
|--------------------------|-------------------------------------|-----------------------------------|---------------|--------------|
| Component                | Extraction Sums of Squared Loadings | Rotation Sums of Squared Loadings |               |              |
|                          | Cumulative %                        | Total                             | % of Variance | Cumulative % |
| 1                        | 37.665                              | 3.250                             | 32.505        | 32.505       |

|    |        |       |        |        |
|----|--------|-------|--------|--------|
| 2  | 51.525 | 1.902 | 19.020 | 51.525 |
| 3  |        |       |        |        |
| 4  |        |       |        |        |
| 5  |        |       |        |        |
| 6  |        |       |        |        |
| 7  |        |       |        |        |
| 8  |        |       |        |        |
| 9  |        |       |        |        |
| 10 |        |       |        |        |

Extraction Method: Principal Component Analysis.

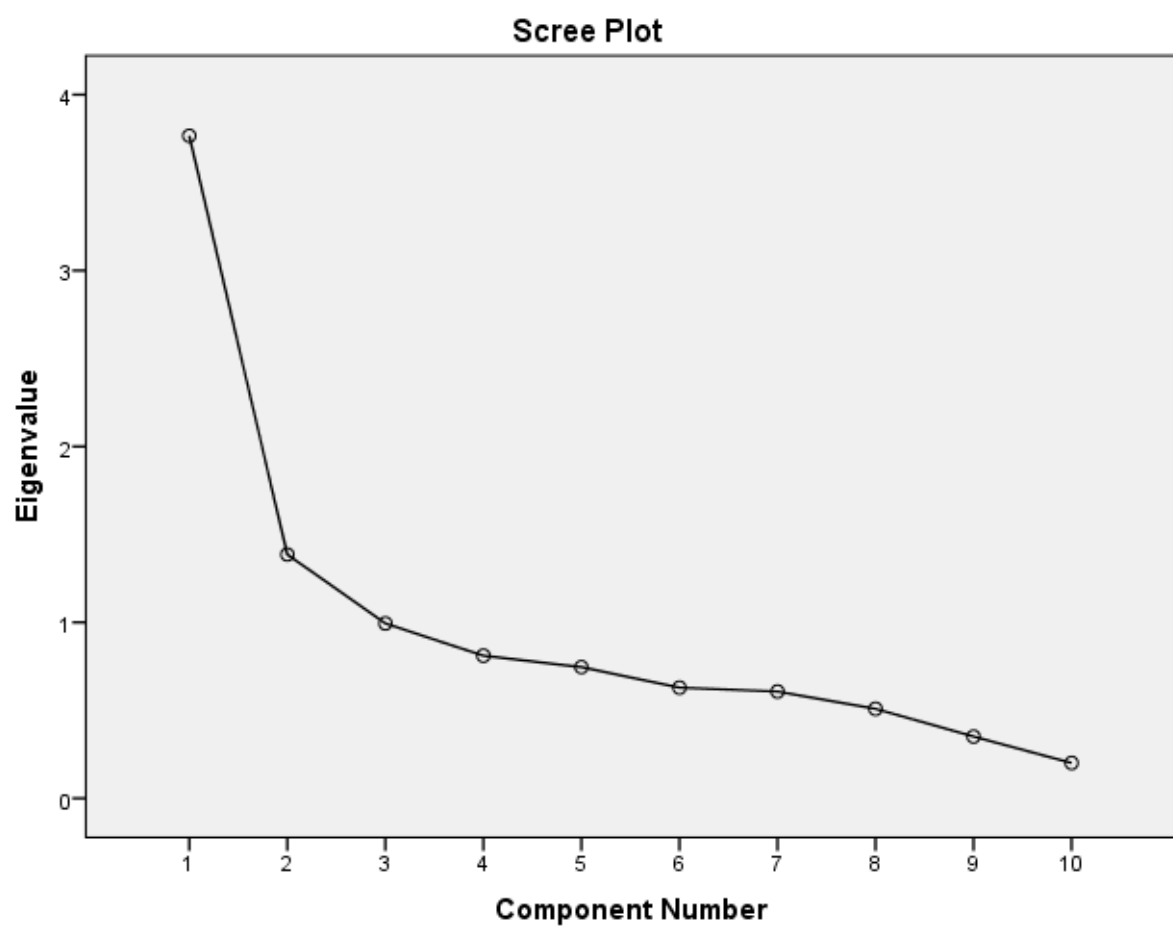

**Component Matrix<sup>a</sup>**

|      | Component |       |
|------|-----------|-------|
|      | 1         | 2     |
| MDR1 | -.758     | -.002 |
| MDR2 | .671      | -.065 |

|       |       |      |
|-------|-------|------|
| MDR3  | -.359 | .415 |
| MDR4  | .713  | .223 |
| MDR5  | -.327 | .650 |
| MDR6  | .719  | .087 |
| MDR7  | .892  | .060 |
| MDR8  | .570  | .402 |
| MDR9  | -.470 | .587 |
| MDR11 | .375  | .469 |

Extraction Method: Principal

Component Analysis.<sup>a</sup>

a. 2 components extracted.

| Rotated Component Matrix <sup>a</sup> |           |       |
|---------------------------------------|-----------|-------|
|                                       | Component |       |
|                                       | 1         | 2     |
| MDR1                                  | -.672     | .351  |
| MDR2                                  | .563      | -.370 |
| MDR3                                  | -.124     | .534  |
| MDR4                                  | .735      | -.134 |
| MDR5                                  | .013      | .727  |
| MDR6                                  | .677      | -.257 |
| MDR7                                  | .817      | -.362 |
| MDR8                                  | .691      | .090  |
| MDR9                                  | -.143     | .739  |
| MDR11                                 | .550      | .241  |

Extraction Method: Principal

Component Analysis.

Rotation Method: Varimax with

Kaiser Normalization.<sup>a</sup>

a. Rotation converged in 3 iterations.

| Component Transformation Matrix |      |       |
|---------------------------------|------|-------|
| Component                       | 1    | 2     |
| 1                               | .885 | -.466 |
| 2                               | .466 | .885  |

Extraction Method: Principal Component

Analysis.

Rotation Method: Varimax with Kaiser

Normalization.

FACTOR

```
/VARIABLES MDR1 MDR2 MDR3 MDR4 MDR5 MDR6 MDR7 MDR8 MDR9 MDR11  
/MISSING LISTWISE  
/ANALYSIS MDR1 MDR2 MDR3 MDR4 MDR5 MDR6 MDR7 MDR8 MDR9 MDR11  
/PRINT INITIAL CORRELATION KMO EXTRACTION ROTATION FSCORE  
/FORMAT SORT BLANK(.10)  
/PLOT EIGEN  
/CRITERIA MINEIGEN(1) ITERATE(25)  
/EXTRACTION PC  
/CRITERIA ITERATE(25)  
/ROTATION VARIMAX  
/SAVE REG(ALL)  
/METHOD=COVARIANCE.
```

## Factor Analysis

### Notes

|                           |                                                                                       |
|---------------------------|---------------------------------------------------------------------------------------|
| Output Created            | 15-SEP-2022 14:40:48                                                                  |
| Comments                  |                                                                                       |
| Data                      | C:\DBA\research paper,\German med paper\statistics\110 spss data.sav                  |
| Active Dataset            | DataSet1                                                                              |
| Filter                    | <none>                                                                                |
| Weight                    | <none>                                                                                |
| Split File                | <none>                                                                                |
| N of Rows in Working Data | 110                                                                                   |
| File                      |                                                                                       |
| Definition of Missing     | MISSING=EXCLUDE: User-defined missing values are treated as missing.                  |
| Missing Value Handling    | LISTWISE: Statistics are based on cases with no missing values for any variable used. |
| Cases Used                |                                                                                       |

|                   |                                                                                                                                                                                                                                                                                                                                                                                                                                        |                       |
|-------------------|----------------------------------------------------------------------------------------------------------------------------------------------------------------------------------------------------------------------------------------------------------------------------------------------------------------------------------------------------------------------------------------------------------------------------------------|-----------------------|
| Syntax            | FACTOR<br>/VARIABLES MDR1 MDR2 MDR3<br>MDR4 MDR5 MDR6 MDR7 MDR8<br>MDR9 MDR11<br>/MISSING LISTWISE<br>/ANALYSIS MDR1 MDR2 MDR3<br>MDR4 MDR5 MDR6 MDR7 MDR8<br>MDR9 MDR11<br>/PRINT INITIAL CORRELATION<br>KMO EXTRACTION ROTATION<br>FSCORE<br>/FORMAT SORT BLANK(.10)<br>/PLOT EIGEN<br>/CRITERIA MINEIGEN(1)<br>ITERATE(25)<br>/EXTRACTION PC<br>/CRITERIA ITERATE(25)<br>/ROTATION VARIMAX<br>/SAVE REG(ALL)<br>/METHOD=COVARIANCE. |                       |
|                   |                                                                                                                                                                                                                                                                                                                                                                                                                                        |                       |
| Resources         | Processor Time                                                                                                                                                                                                                                                                                                                                                                                                                         | 00:00:00.14           |
|                   | Elapsed Time                                                                                                                                                                                                                                                                                                                                                                                                                           | 00:00:00.13           |
|                   | Maximum Memory Required                                                                                                                                                                                                                                                                                                                                                                                                                | 14616 (14.273K) bytes |
| Variables Created | FAC1_1                                                                                                                                                                                                                                                                                                                                                                                                                                 | Component score 1     |
|                   | FAC2_1                                                                                                                                                                                                                                                                                                                                                                                                                                 | Component score 2     |

[DataSet1] C:\DBA\research paper,\German med paper\statistics\110 spss data.sav

| Correlation Matrix |      |       |       |       |       |       |       |
|--------------------|------|-------|-------|-------|-------|-------|-------|
|                    |      | MDR1  | MDR2  | MDR3  | MDR4  | MDR5  | MDR6  |
| Correlation        | MDR1 | 1.000 | -.394 | .231  | -.392 | .223  | -.382 |
|                    | MDR2 | -.394 | 1.000 | -.155 | .534  | -.175 | .519  |
|                    | MDR3 | .231  | -.155 | 1.000 | -.080 | .201  | -.211 |
|                    | MDR4 | -.392 | .534  | -.080 | 1.000 | -.113 | .425  |
|                    | MDR5 | .223  | -.175 | .201  | -.113 | 1.000 | -.135 |
|                    | MDR6 | -.382 | .519  | -.211 | .425  | -.135 | 1.000 |
|                    | MDR7 | -.709 | .508  | -.273 | .635  | -.232 | .554  |
|                    | MDR8 | -.410 | .160  | -.101 | .367  | -.006 | .395  |
|                    | MDR9 | .327  | -.247 | .244  | -.177 | .348  | -.260 |



|       |       |      |       |      |      |      |
|-------|-------|------|-------|------|------|------|
| MDR11 | -.278 | .080 | -.064 | .231 | .011 | .230 |
|-------|-------|------|-------|------|------|------|

**Correlation Matrix**

|       | MDR7  | MDR8  | MDR9  | MDR11 |
|-------|-------|-------|-------|-------|
| MDR1  | -.709 | -.410 | .327  | -.278 |
| MDR2  | .508  | .160  | -.247 | .080  |
| MDR3  | -.273 | -.101 | .244  | -.064 |
| MDR4  | .635  | .367  | -.177 | .231  |
| MDR5  | -.232 | -.006 | .348  | .011  |
| MDR6  | .554  | .395  | -.260 | .230  |
| MDR7  | 1.000 | .482  | -.363 | .315  |
| MDR8  | .482  | 1.000 | -.098 | .262  |
| MDR9  | -.363 | -.098 | 1.000 | .015  |
| MDR11 | .315  | .262  | .015  | 1.000 |

**KMO and Bartlett's Test<sup>a</sup>**

|                                                  |         |
|--------------------------------------------------|---------|
| Kaiser-Meyer-Olkin Measure of Sampling Adequacy. | .800    |
| Approx. Chi-Square                               | 314.127 |
| Bartlett's Test of Sphericity                    | df      |
|                                                  | 45      |
| Sig.                                             | .000    |

a. Based on correlations

**Communalities**

|       | Raw     |            | Rescaled |            |
|-------|---------|------------|----------|------------|
|       | Initial | Extraction | Initial  | Extraction |
| MDR1  | .755    | .449       | 1.000    | .595       |
| MDR2  | .507    | .188       | 1.000    | .371       |
| MDR3  | .762    | .145       | 1.000    | .191       |
| MDR4  | .472    | .215       | 1.000    | .455       |
| MDR5  | .771    | .250       | 1.000    | .325       |
| MDR6  | .751    | .384       | 1.000    | .511       |
| MDR7  | .719    | .563       | 1.000    | .783       |
| MDR8  | .430    | .153       | 1.000    | .356       |
| MDR9  | 1.470   | 1.250      | 1.000    | .850       |
| MDR11 | 1.000   | .523       | 1.000    | .523       |

Extraction Method: Principal Component Analysis.

**Total Variance Explained**

| Component |    | Initial Eigenvalues <sup>a</sup> |               |              | Extraction Sums of Squared Loadings |               |
|-----------|----|----------------------------------|---------------|--------------|-------------------------------------|---------------|
|           |    | Total                            | % of Variance | Cumulative % | Total                               | % of Variance |
| Raw       | 1  | 2.763                            | 36.184        | 36.184       | 2.763                               | 36.184        |
|           | 2  | 1.359                            | 17.791        | 53.975       | 1.359                               | 17.791        |
|           | 3  | .761                             | 9.960         | 63.935       |                                     |               |
|           | 4  | .682                             | 8.935         | 72.870       |                                     |               |
|           | 5  | .599                             | 7.844         | 80.714       |                                     |               |
|           | 6  | .488                             | 6.395         | 87.108       |                                     |               |
|           | 7  | .362                             | 4.741         | 91.849       |                                     |               |
|           | 8  | .300                             | 3.928         | 95.777       |                                     |               |
|           | 9  | .190                             | 2.490         | 98.267       |                                     |               |
|           | 10 | .132                             | 1.733         | 100.000      |                                     |               |
| Rescaled  | 1  | 2.763                            | 36.184        | 36.184       | 3.579                               | 35.786        |
|           | 2  | 1.359                            | 17.791        | 53.975       | 1.383                               | 13.834        |
|           | 3  | .761                             | 9.960         | 63.935       |                                     |               |
|           | 4  | .682                             | 8.935         | 72.870       |                                     |               |
|           | 5  | .599                             | 7.844         | 80.714       |                                     |               |
|           | 6  | .488                             | 6.395         | 87.108       |                                     |               |
|           | 7  | .362                             | 4.741         | 91.849       |                                     |               |
|           | 8  | .300                             | 3.928         | 95.777       |                                     |               |
|           | 9  | .190                             | 2.490         | 98.267       |                                     |               |
|           | 10 | .132                             | 1.733         | 100.000      |                                     |               |

**Total Variance Explained**

| Component |   | Extraction Sums of Squared Loadings <sup>a</sup> | Rotation Sums of Squared Loadings |               |              |
|-----------|---|--------------------------------------------------|-----------------------------------|---------------|--------------|
|           |   | Cumulative %                                     | Total                             | % of Variance | Cumulative % |
| Raw       | 1 | 36.184                                           | 2.157                             | 28.238        | 28.238       |
|           | 2 | 53.975                                           | 1.966                             | 25.737        | 53.975       |
|           | 3 |                                                  |                                   |               |              |
|           | 4 |                                                  |                                   |               |              |
|           | 5 |                                                  |                                   |               |              |
|           | 6 |                                                  |                                   |               |              |
|           | 7 |                                                  |                                   |               |              |

|          |    |        |       |        |        |
|----------|----|--------|-------|--------|--------|
|          | 8  |        |       |        |        |
|          | 9  |        |       |        |        |
|          | 10 |        |       |        |        |
|          | 1  | 35.786 | 3.137 | 31.369 | 31.369 |
|          | 2  | 49.619 | 1.825 | 18.251 | 49.619 |
|          | 3  |        |       |        |        |
|          | 4  |        |       |        |        |
| Rescaled | 5  |        |       |        |        |
|          | 6  |        |       |        |        |
|          | 7  |        |       |        |        |
|          | 8  |        |       |        |        |
|          | 9  |        |       |        |        |
|          | 10 |        |       |        |        |

Extraction Method: Principal Component Analysis.

a. When analyzing a covariance matrix, the initial eigenvalues are the same across the raw and rescaled solution.

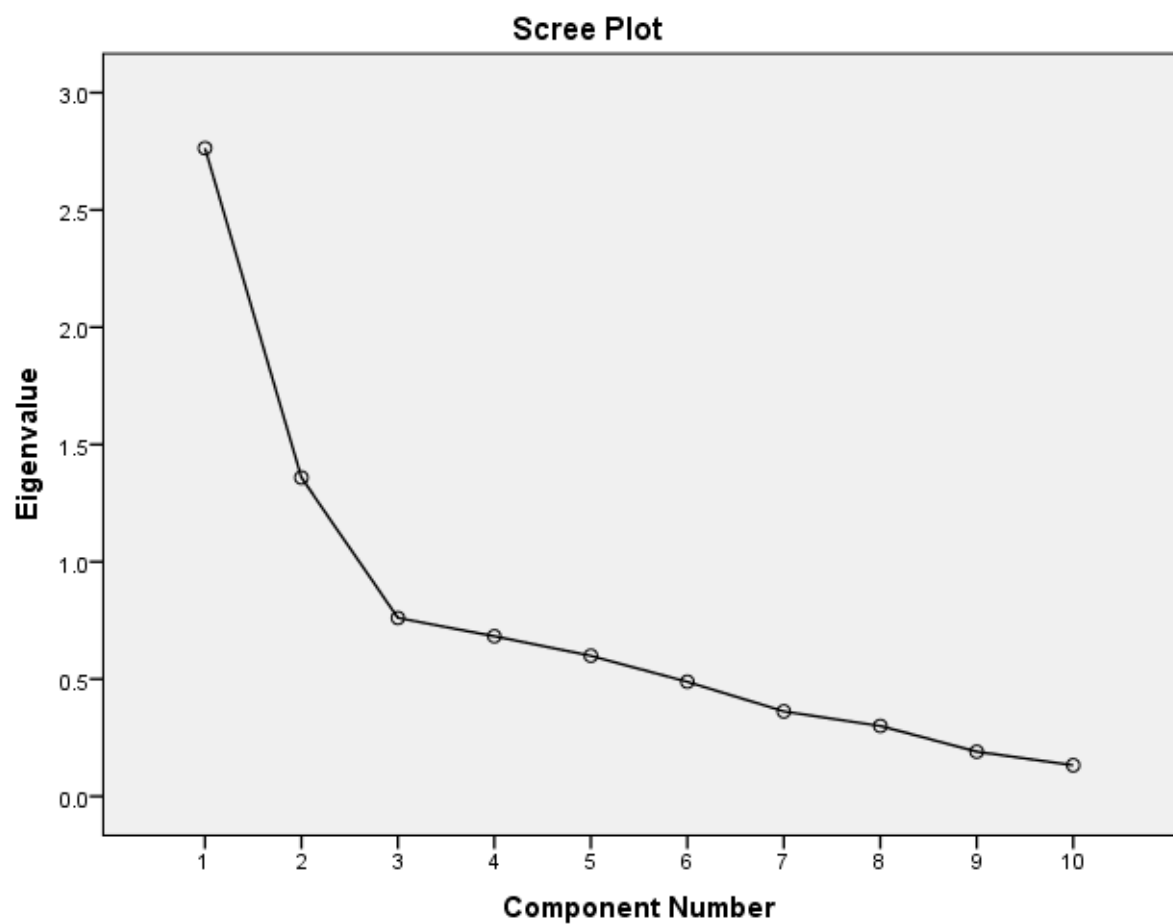

**Component Matrix<sup>a</sup>**

|       | Raw       |       | Rescaled  |       |
|-------|-----------|-------|-----------|-------|
|       | Component |       | Component |       |
|       | 1         | 2     | 1         | 2     |
| MDR7  | .720      | .211  | .850      | .248  |
| MDR1  | -.649     | -.168 | -.747     | -.193 |
| MDR6  | .584      | .208  | .674      | .240  |
| MDR9  | -.810     | .771  | -.668     | .636  |
| MDR4  | .412      | .212  | .600      | .308  |
| MDR2  | .427      | .079  | .599      | .110  |
| MDR8  | .309      | .241  | .471      | .367  |
| MDR5  | -.363     | .345  | -.413     | .393  |
| MDR3  | -.357     | .133  | -.409     | .152  |
| MDR11 | .346      | .635  | .346      | .635  |

Extraction Method: Principal Component Analysis.<sup>a</sup>

a. 2 components extracted.

**Rotated Component Matrix<sup>a</sup>**

|       | Raw       |       | Rescaled  |       |
|-------|-----------|-------|-----------|-------|
|       | Component |       | Component |       |
|       | 1         | 2     | 1         | 2     |
| MDR7  | .681      | -.315 | .804      | -.371 |
| MDR1  | -.600     | .300  | -.690     | .345  |
| MDR11 | .678      | .252  | .678      | .252  |
| MDR6  | .577      | -.227 | .666      | -.262 |
| MDR4  | .450      | -.111 | .655      | -.162 |
| MDR8  | .391      |       | .596      |       |
| MDR2  | .373      | -.221 | .524      | -.311 |
| MDR9  |           | 1.113 |           | .918  |
| MDR5  |           | .498  |           | .567  |
| MDR3  | -.182     | .335  | -.208     | .384  |

Extraction Method: Principal Component Analysis.

Rotation Method: Varimax with Kaiser Normalization.<sup>a</sup>

a. Rotation converged in 3 iterations.

**Component Transformation Matrix**

| Component | 1    | 2     |
|-----------|------|-------|
| 1         | .754 | -.657 |
| 2         | .657 | .754  |

Extraction Method: Principal Component Analysis.

Rotation Method: Varimax with Kaiser Normalization.

**Component Score Coefficient****Matrix<sup>a</sup>**

|       | Component |       |
|-------|-----------|-------|
|       | 1         | 2     |
| MDR1  | -.224     | .053  |
| MDR2  | .110      | -.041 |
| MDR3  | -.029     | .138  |
| MDR4  | .147      | .013  |
| MDR5  | .060      | .244  |
| MDR6  | .225      | -.020 |
| MDR7  | .253      | -.046 |
| MDR8  | .132      | .039  |
| MDR9  | .184      | .752  |
| MDR11 | .401      | .270  |

Extraction Method: Principal Component Analysis.

Rotation Method: Varimax with Kaiser Normalization.

Component Scores.<sup>a</sup>

a. Coefficients are standardized.

**Component Score Covariance Matrix**

| Component | 1     | 2     |
|-----------|-------|-------|
| 1         | 1.000 | .000  |
| 2         | .000  | 1.000 |

Extraction Method: Principal Component

Analysis.

Rotation Method: Varimax with Kaiser

Normalization.

Component Scores.

FACTOR

```
/VARIABLES SMEF1 SMEF2 SMEF3 SMEF4 SMEF6 SMEF5
/MISSING LISTWISE
/ANALYSIS SMEF1 SMEF2 SMEF3 SMEF4 SMEF6 SMEF5
/PRINT INITIAL CORRELATION KMO EXTRACTION ROTATION FSCORE
/FORMAT SORT BLANK(.10)
/PLOT EIGEN
/CRITERIA MINEIGEN(1) ITERATE(25)
/EXTRACTION PC
/CRITERIA ITERATE(25)
/ROTATION VARIMAX
/SAVE REG(ALL)
/METHOD=COVARIANCE.
```

## Factor Analysis

| Notes                  |                           |                                                                                       |
|------------------------|---------------------------|---------------------------------------------------------------------------------------|
| Output Created         |                           | 15-SEP-2022 14:44:07                                                                  |
| Comments               |                           |                                                                                       |
| Input                  | Data                      | C:\DBA\research paper,\German med paper\statistics\110 spss data.sav                  |
|                        | Active Dataset            | DataSet1                                                                              |
|                        | Filter                    | <none>                                                                                |
|                        | Weight                    | <none>                                                                                |
|                        | Split File                | <none>                                                                                |
|                        | N of Rows in Working Data | 110                                                                                   |
|                        | File                      |                                                                                       |
| Missing Value Handling | Definition of Missing     | MISSING=EXCLUDE: User-defined missing values are treated as missing.                  |
|                        | Cases Used                | LISTWISE: Statistics are based on cases with no missing values for any variable used. |

|                   |                                                                                                                                                                                                                                                                                                                                                                                                    |                     |
|-------------------|----------------------------------------------------------------------------------------------------------------------------------------------------------------------------------------------------------------------------------------------------------------------------------------------------------------------------------------------------------------------------------------------------|---------------------|
| Syntax            | FACTOR<br>/VARIABLES SMEF1 SMEF2<br>SMEF3 SMEF4 SMEF6 SMEF5<br>/MISSING LISTWISE<br>/ANALYSIS SMEF1 SMEF2 SMEF3<br>SMEF4 SMEF6 SMEF5<br>/PRINT INITIAL CORRELATION<br>KMO EXTRACTION ROTATION<br>FSCORE<br>/FORMAT SORT BLANK(.10)<br>/PLOT EIGEN<br>/CRITERIA MINEIGEN(1)<br>ITERATE(25)<br>/EXTRACTION PC<br>/CRITERIA ITERATE(25)<br>/ROTATION VARIMAX<br>/SAVE REG(ALL)<br>/METHOD=COVARIANCE. |                     |
|                   |                                                                                                                                                                                                                                                                                                                                                                                                    |                     |
| Resources         | Processor Time                                                                                                                                                                                                                                                                                                                                                                                     | 00:00:00.11         |
|                   | Elapsed Time                                                                                                                                                                                                                                                                                                                                                                                       | 00:00:00.10         |
|                   | Maximum Memory Required                                                                                                                                                                                                                                                                                                                                                                            | 6120 (5.977K) bytes |
| Variables Created | FAC1_2                                                                                                                                                                                                                                                                                                                                                                                             | Component score 1   |
|                   | FAC2_2                                                                                                                                                                                                                                                                                                                                                                                             | Component score 2   |

[DataSet1] C:\DBA\research paper,\German med paper\statistics\110 spss data.sav

**Correlation Matrix**

|             |       | SMEF1 | SMEF2 | SMEF3 | SMEF4 | SMEF6 | SMEF5 |
|-------------|-------|-------|-------|-------|-------|-------|-------|
| Correlation | SMEF1 | 1.000 | .391  | .093  | .437  | -.128 | .239  |
|             | SMEF2 | .391  | 1.000 | .296  | .699  | -.250 | .485  |
|             | SMEF3 | .093  | .296  | 1.000 | .247  | -.085 | .118  |
|             | SMEF4 | .437  | .699  | .247  | 1.000 | -.207 | .470  |
|             | SMEF6 | -.128 | -.250 | -.085 | -.207 | 1.000 | -.139 |
|             | SMEF5 | .239  | .485  | .118  | .470  | -.139 | 1.000 |

**KMO and Bartlett's Test<sup>a</sup>**

|                                                  |      |
|--------------------------------------------------|------|
| Kaiser-Meyer-Olkin Measure of Sampling Adequacy. | .765 |
|--------------------------------------------------|------|

|                               |                    |         |
|-------------------------------|--------------------|---------|
|                               | Approx. Chi-Square | 139.558 |
| Bartlett's Test of Sphericity | df                 | 15      |
|                               | Sig.               | .000    |

a. Based on correlations

| Communalities |         |            |          |            |
|---------------|---------|------------|----------|------------|
|               | Raw     |            | Rescaled |            |
|               | Initial | Extraction | Initial  | Extraction |
| SMEF1         | .595    | .229       | 1.000    | .385       |
| SMEF2         | .573    | .423       | 1.000    | .739       |
| SMEF3         | .616    | .108       | 1.000    | .175       |
| SMEF4         | .756    | .607       | 1.000    | .804       |
| SMEF6         | 1.066   | 1.065      | 1.000    | .999       |
| SMEF5         | .436    | .166       | 1.000    | .380       |

Extraction Method: Principal Component Analysis.

| Total Variance Explained |   |                                  |               |              |                                     |               |
|--------------------------|---|----------------------------------|---------------|--------------|-------------------------------------|---------------|
| Component                |   | Initial Eigenvalues <sup>a</sup> |               |              | Extraction Sums of Squared Loadings |               |
|                          |   | Total                            | % of Variance | Cumulative % | Total                               | % of Variance |
| Raw                      | 1 | 1.684                            | 41.661        | 41.661       | 1.684                               | 41.661        |
|                          | 2 | .914                             | 22.625        | 64.285       | .914                                | 22.625        |
|                          | 3 | .569                             | 14.068        | 78.353       |                                     |               |
|                          | 4 | .415                             | 10.277        | 88.630       |                                     |               |
|                          | 5 | .271                             | 6.711         | 95.342       |                                     |               |
|                          | 6 | .188                             | 4.658         | 100.000      |                                     |               |
| Rescaled                 | 1 | 1.684                            | 41.661        | 41.661       | 2.499                               | 41.654        |
|                          | 2 | .914                             | 22.625        | 64.285       | .982                                | 16.372        |
|                          | 3 | .569                             | 14.068        | 78.353       |                                     |               |
|                          | 4 | .415                             | 10.277        | 88.630       |                                     |               |
|                          | 5 | .271                             | 6.711         | 95.342       |                                     |               |
|                          | 6 | .188                             | 4.658         | 100.000      |                                     |               |

Total Variance Explained



| Component |   | Extraction Sums of Squared Loadings <sup>a</sup> | Rotation Sums of Squared Loadings |               |              |
|-----------|---|--------------------------------------------------|-----------------------------------|---------------|--------------|
|           |   |                                                  | Total                             | % of Variance | Cumulative % |
| Raw       | 1 | 41.661                                           | 1.517                             | 37.532        | 37.532       |
|           | 2 | 64.285                                           | 1.081                             | 26.753        | 64.285       |
|           | 3 |                                                  |                                   |               |              |
|           | 4 |                                                  |                                   |               |              |
|           | 5 |                                                  |                                   |               |              |
|           | 6 |                                                  |                                   |               |              |
| Rescaled  | 1 | 41.654                                           | 2.446                             | 40.766        | 40.766       |
|           | 2 | 58.026                                           | 1.036                             | 17.260        | 58.026       |
|           | 3 |                                                  |                                   |               |              |
|           | 4 |                                                  |                                   |               |              |
|           | 5 |                                                  |                                   |               |              |
|           | 6 |                                                  |                                   |               |              |

Extraction Method: Principal Component Analysis.

a. When analyzing a covariance matrix, the initial eigenvalues are the same across the raw and rescaled solution.

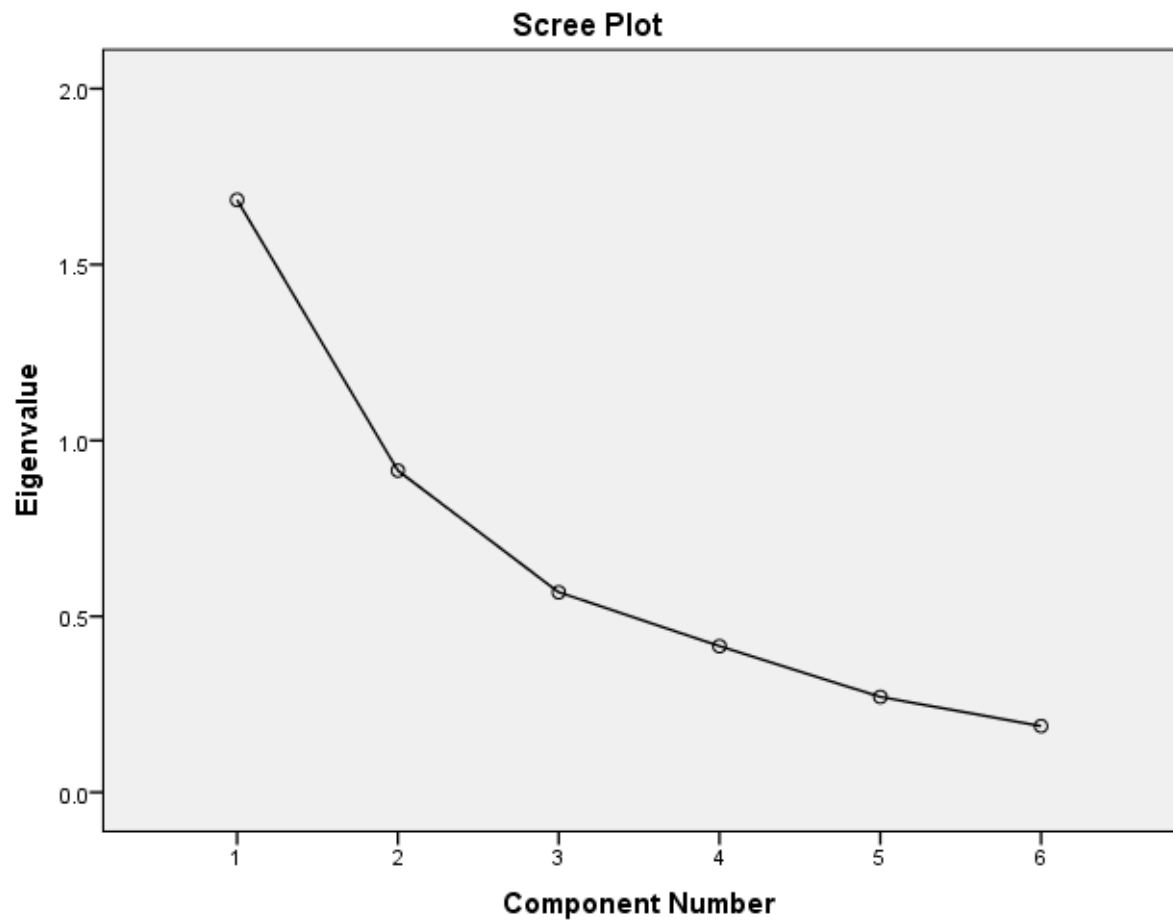

**Component Matrix<sup>a</sup>**

|       | Raw       |      | Rescaled  |      |
|-------|-----------|------|-----------|------|
|       | Component |      | Component |      |
|       | 1         | 2    | 1         | 2    |
| SMEF4 | .729      | .276 | .838      | .318 |
| SMEF2 | .624      | .184 | .825      | .243 |
| SMEF5 | .381      | .145 | .576      | .220 |
| SMEF1 | .439      | .191 | .569      | .248 |
| SMEF3 | .300      | .133 | .382      | .170 |
| SMEF6 | -.580     | .854 | -.561     | .827 |

Extraction Method: Principal Component Analysis.<sup>a</sup>

a. 2 components extracted.

**Rotated Component Matrix<sup>a</sup>**

|       | Raw       |       | Rescaled  |       |
|-------|-----------|-------|-----------|-------|
|       | Component |       | Component |       |
|       | 1         | 2     | 1         | 2     |
| SMEF4 | .774      | -.095 | .890      | -.109 |
| SMEF2 | .638      | -.128 | .843      | -.169 |
| SMEF1 | .477      |       | .619      |       |
| SMEF5 | .404      |       | .612      |       |
| SMEF3 | .327      |       | .417      |       |
| SMEF6 | -.115     | 1.026 | -.112     | .993  |

Extraction Method: Principal Component Analysis.

Rotation Method: Varimax with Kaiser Normalization.<sup>a</sup>

a. Rotation converged in 3 iterations.

#### Component Transformation Matrix

| Component | 1    | 2     |
|-----------|------|-------|
| 1         | .885 | -.466 |
| 2         | .466 | .885  |

Extraction Method: Principal Component Analysis.

Rotation Method: Varimax with Kaiser Normalization.

#### Component Score Coefficient Matrix<sup>a</sup>

|       | Component |       |
|-------|-----------|-------|
|       | 1         | 2     |
| SMEF1 | .253      | .049  |
| SMEF2 | .319      | .004  |
| SMEF3 | .177      | .036  |
| SMEF4 | .455      | .057  |
| SMEF6 | .134      | 1.019 |
| SMEF5 | .181      | .023  |

Extraction Method: Principal Component Analysis.

Rotation Method: Varimax with Kaiser Normalization.

Component Scores.<sup>a</sup>

a. Coefficients are standardized.

**Component Score Covariance Matrix**

| Component | 1     | 2     |
|-----------|-------|-------|
| 1         | 1.000 | .000  |
| 2         | .000  | 1.000 |

Extraction Method: Principal Component Analysis.

Rotation Method: Varimax with Kaiser

Normalization.

Component Scores.

FACTOR

```

/VARIABLES SMEP1 SMEP2 SMEP3 SMEP5 SMEP6 SMEP7 SMEP8
/MISSING LISTWISE
/ANALYSIS SMEP1 SMEP2 SMEP3 SMEP5 SMEP6 SMEP7 SMEP8
/PRINT INITIAL CORRELATION KMO EXTRACTION ROTATION FSCORE
/FORMAT SORT BLANK(.10)
/PLOT EIGEN
/CRITERIA MINEIGEN(1) ITERATE(25)
/EXTRACTION PC
/CRITERIA ITERATE(25)
/ROTATION VARIMAX
/SAVE REG(ALL)
/METHOD=COVARIANCE.

```

## Factor Analysis

### Notes

|                |                           |                                                                      |
|----------------|---------------------------|----------------------------------------------------------------------|
| Output Created | 15-SEP-2022 14:46:40      |                                                                      |
| Comments       |                           |                                                                      |
| Input          | Data                      | C:\DBA\research paper,\German med paper\statistics\110 spss data.sav |
|                | Active Dataset            | DataSet1                                                             |
|                | Filter                    | <none>                                                               |
|                | Weight                    | <none>                                                               |
|                | Split File                | <none>                                                               |
|                | N of Rows in Working Data | 110                                                                  |
|                | File                      |                                                                      |

|                        |                         |                                                                                                                                                                                                                                                                                                                                                                                                                   |
|------------------------|-------------------------|-------------------------------------------------------------------------------------------------------------------------------------------------------------------------------------------------------------------------------------------------------------------------------------------------------------------------------------------------------------------------------------------------------------------|
| Missing Value Handling | Definition of Missing   | MISSING=EXCLUDE: User-defined missing values are treated as missing.                                                                                                                                                                                                                                                                                                                                              |
|                        | Cases Used              | LISTWISE: Statistics are based on cases with no missing values for any variable used.                                                                                                                                                                                                                                                                                                                             |
| Syntax                 |                         | FACTOR<br>/VARIABLES SMEP1 SMEP2<br>SMEP3 SMEP5 SMEP6 SMEP7<br>SMEP8<br>/MISSING LISTWISE<br>/ANALYSIS SMEP1 SMEP2 SMEP3<br>SMEP5 SMEP6 SMEP7 SMEP8<br>/PRINT INITIAL CORRELATION<br>KMO EXTRACTION ROTATION<br>FSCORE<br>/FORMAT SORT BLANK(.10)<br>/PLOT EIGEN<br>/CRITERIA MINEIGEN(1)<br>ITERATE(25)<br>/EXTRACTION PC<br>/CRITERIA ITERATE(25)<br>/ROTATION VARIMAX<br>/SAVE REG(ALL)<br>/METHOD=COVARIANCE. |
|                        |                         |                                                                                                                                                                                                                                                                                                                                                                                                                   |
| Resources              | Processor Time          | 00:00:00.11                                                                                                                                                                                                                                                                                                                                                                                                       |
|                        | Elapsed Time            | 00:00:00.12                                                                                                                                                                                                                                                                                                                                                                                                       |
|                        | Maximum Memory Required | 7896 (7.711K) bytes                                                                                                                                                                                                                                                                                                                                                                                               |
| Variables Created      | FAC1_3                  | Component score 1                                                                                                                                                                                                                                                                                                                                                                                                 |
|                        | FAC2_3                  | Component score 2                                                                                                                                                                                                                                                                                                                                                                                                 |

[DataSet1] C:\DBA\research paper,\German med paper\statistics\110 spss data.sav

| Correlation Matrix |       |       |       |       |       |       |       |
|--------------------|-------|-------|-------|-------|-------|-------|-------|
|                    |       | SMEP1 | SMEP2 | SMEP3 | SMEP5 | SMEP6 | SMEP7 |
| Correlation        | SMEP1 | 1.000 | .528  | .240  | .469  | .328  | .410  |
|                    | SMEP2 | .528  | 1.000 | .346  | .479  | .353  | .464  |
|                    | SMEP3 | .240  | .346  | 1.000 | .256  | .091  | .282  |
|                    | SMEP5 | .469  | .479  | .256  | 1.000 | .263  | .379  |
|                    | SMEP6 | .328  | .353  | .091  | .263  | 1.000 | .158  |

|  |       |       |       |       |       |      |       |
|--|-------|-------|-------|-------|-------|------|-------|
|  | SMEP7 | .410  | .464  | .282  | .379  | .158 | 1.000 |
|  | SMEP8 | -.236 | -.138 | -.025 | -.036 | .080 | -.196 |

#### Correlation Matrix

|             |       | SMEP8 |
|-------------|-------|-------|
| Correlation | SMEP1 | -.236 |
|             | SMEP2 | -.138 |
|             | SMEP3 | -.025 |
|             | SMEP5 | -.036 |
|             | SMEP6 | .080  |
|             | SMEP7 | -.196 |
|             | SMEP8 | 1.000 |

#### KMO and Bartlett's Test<sup>a</sup>

|                                                  |      |         |
|--------------------------------------------------|------|---------|
| Kaiser-Meyer-Olkin Measure of Sampling Adequacy. |      | .792    |
| Approx. Chi-Square                               |      | 144.905 |
| Bartlett's Test of Sphericity                    | df   | 21      |
|                                                  | Sig. | .000    |

a. Based on correlations

#### Communalities

|       | Raw     |            | Rescaled |            |
|-------|---------|------------|----------|------------|
|       | Initial | Extraction | Initial  | Extraction |
| SMEP1 | .845    | .493       | 1.000    | .583       |
| SMEP2 | .633    | .379       | 1.000    | .598       |
| SMEP3 | 1.141   | .497       | 1.000    | .436       |
| SMEP5 | .706    | .344       | 1.000    | .487       |
| SMEP6 | .618    | .143       | 1.000    | .231       |
| SMEP7 | .779    | .368       | 1.000    | .472       |
| SMEP8 | 1.601   | 1.571      | 1.000    | .981       |

Extraction Method: Principal Component Analysis.

**Total Variance Explained**

| Component |   | Initial Eigenvalues <sup>a</sup> |               |              | Extraction Sums of Squared Loadings |               |
|-----------|---|----------------------------------|---------------|--------------|-------------------------------------|---------------|
|           |   | Total                            | % of Variance | Cumulative % | Total                               | % of Variance |
| Raw       | 1 | 2.265                            | 35.826        | 35.826       | 2.265                               | 35.826        |
|           | 2 | 1.529                            | 24.183        | 60.009       | 1.529                               | 24.183        |
|           | 3 | .891                             | 14.100        | 74.108       |                                     |               |
|           | 4 | .532                             | 8.415         | 82.523       |                                     |               |
|           | 5 | .437                             | 6.908         | 89.432       |                                     |               |
|           | 6 | .375                             | 5.936         | 95.368       |                                     |               |
|           | 7 | .293                             | 4.632         | 100.000      |                                     |               |
| Rescaled  | 1 | 2.265                            | 35.826        | 35.826       | 2.617                               | 37.381        |
|           | 2 | 1.529                            | 24.183        | 60.009       | 1.172                               | 16.742        |
|           | 3 | .891                             | 14.100        | 74.108       |                                     |               |
|           | 4 | .532                             | 8.415         | 82.523       |                                     |               |
|           | 5 | .437                             | 6.908         | 89.432       |                                     |               |
|           | 6 | .375                             | 5.936         | 95.368       |                                     |               |
|           | 7 | .293                             | 4.632         | 100.000      |                                     |               |

**Total Variance Explained**

| Component |   | Extraction Sums of Squared Loadings <sup>a</sup> | Rotation Sums of Squared Loadings |               |              |
|-----------|---|--------------------------------------------------|-----------------------------------|---------------|--------------|
|           |   | Cumulative %                                     | Total                             | % of Variance | Cumulative % |
| Raw       | 1 | 35.826                                           | 2.100                             | 33.214        | 33.214       |
|           | 2 | 60.009                                           | 1.694                             | 26.795        | 60.009       |
|           | 3 |                                                  |                                   |               |              |
|           | 4 |                                                  |                                   |               |              |
|           | 5 |                                                  |                                   |               |              |
|           | 6 |                                                  |                                   |               |              |
|           | 7 |                                                  |                                   |               |              |
| Rescaled  | 1 | 37.381                                           | 2.650                             | 37.851        | 37.851       |
|           | 2 | 54.123                                           | 1.139                             | 16.273        | 54.123       |
|           | 3 |                                                  |                                   |               |              |
|           | 4 |                                                  |                                   |               |              |
|           | 5 |                                                  |                                   |               |              |
|           | 6 |                                                  |                                   |               |              |
|           | 7 |                                                  |                                   |               |              |

Extraction Method: Principal Component Analysis.

a. When analyzing a covariance matrix, the initial eigenvalues are the same across the raw and rescaled solution.

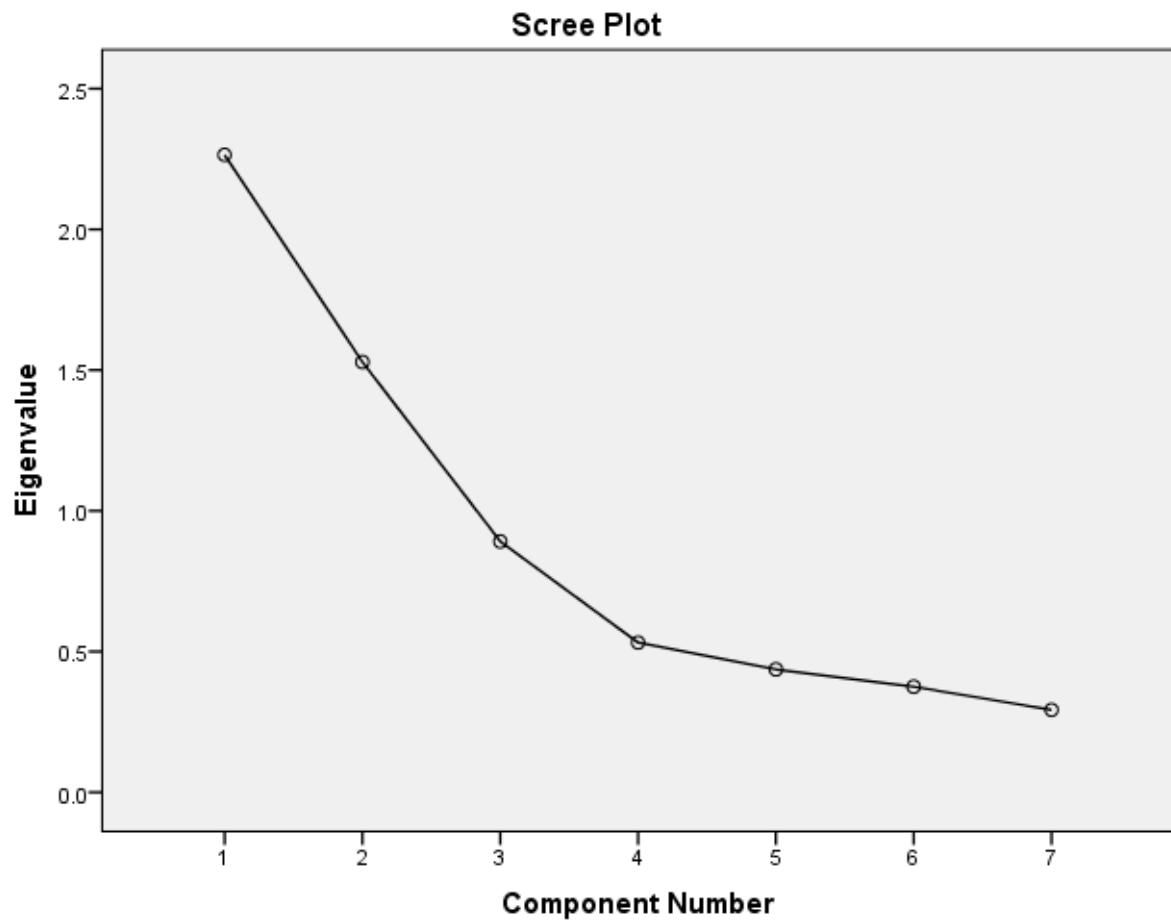

| Component Matrix <sup>a</sup> |           |       |           |      |
|-------------------------------|-----------|-------|-----------|------|
|                               | Raw       |       | Rescaled  |      |
|                               | Component |       | Component |      |
|                               | 1         | 2     | 1         | 2    |
| SMEP1                         | .695      | .098  | .756      | .107 |
| SMEP2                         | .582      | .201  | .731      | .252 |
| SMEP7                         | .599      | .095  | .679      | .108 |
| SMEP5                         | .520      | .270  | .619      | .321 |
| SMEP3                         | .583      | .397  | .546      | .371 |
| SMEP6                         | .269      | .265  | .342      | .337 |
| SMEP8                         | -.634     | 1.081 | -.501     | .855 |



Extraction Method: Principal Component Analysis.<sup>a</sup>

a. 2 components extracted.

**Rotated Component Matrix<sup>a</sup>**

|       | Raw       |       | Rescaled  |       |
|-------|-----------|-------|-----------|-------|
|       | Component |       | Component |       |
|       | 1         | 2     | 1         | 2     |
| SMEP2 | .608      | -.099 | .763      | -.124 |
| SMEP1 | .659      | -.243 | .717      | -.264 |
| SMEP5 | .586      |       | .698      |       |
| SMEP3 | .701      |       | .657      |       |
| SMEP7 | .573      | -.200 | .649      | -.226 |
| SMEP6 | .362      | .106  | .461      | .135  |
| SMEP8 |           | 1.252 |           | .990  |

Extraction Method: Principal Component Analysis.

Rotation Method: Varimax with Kaiser Normalization.<sup>a</sup>

a. Rotation converged in 3 iterations.

**Component Transformation Matrix**

| Component | 1    | 2     |
|-----------|------|-------|
| 1         | .881 | -.474 |
| 2         | .474 | .881  |

Extraction Method: Principal Component Analysis.

Rotation Method: Varimax with Kaiser Normalization.

**Component Score Coefficient**

**Matrix<sup>a</sup>**

|       | Component |       |
|-------|-----------|-------|
|       | 1         | 2     |
| SMEP1 | .276      | -.082 |
| SMEP2 | .230      | -.005 |
| SMEP3 | .373      | .114  |
| SMEP5 | .240      | .039  |
| SMEP6 | .147      | .076  |

|       |      |       |
|-------|------|-------|
| SMEP7 | .232 | -.062 |
| SMEP8 | .112 | .956  |

Extraction Method: Principal

Component Analysis.

Rotation Method: Varimax with

Kaiser Normalization.

Component Scores.<sup>a</sup>

a. Coefficients are standardized.

**Component Score Covariance Matrix**

| Component | 1     | 2     |
|-----------|-------|-------|
| 1         | 1.000 | .000  |
| 2         | .000  | 1.000 |

Extraction Method: Principal Component

Analysis.

Rotation Method: Varimax with Kaiser

Normalization.

Component Scores.
